# Supplementary material for: Directed, nickel-catalyzed 1,2-alkylsulfenylation of alkenyl carbonyl compounds
Source: Royal Society of Chemistry journal article supplement (doi:10.1039/d2sc01563c), 2022-01-01

# Directed, Nickel-Catalyzed 1,2-Alkylsulfenylation of Alkenyl Carbonyl Compounds

Zi-Qi Li,<sup>a</sup> Wen-Ji He,<sup>a</sup> Hui-Qi Ni,<sup>a</sup> and Keary M. Engle<sup>a\*</sup>

<sup>a</sup> Department of Chemistry, The Scripps Research Institute, 10550 North Torrey Pines Road, La Jolla, California 92037, United States

\*keary@scripps.edu

## Table of Contents

|                                                            |           |
|------------------------------------------------------------|-----------|
| <b>General Information .....</b>                           | <b>2</b>  |
| <b>Table of Substrates .....</b>                           | <b>3</b>  |
| <b>Experimental Procedures .....</b>                       | <b>4</b>  |
| <b>Representative Procedures and Analytical Data .....</b> | <b>9</b>  |
| <b>X-Ray Crystallography .....</b>                         | <b>26</b> |
| <b>DFT Calculations .....</b>                              | <b>47</b> |
| <b>References .....</b>                                    | <b>55</b> |
| <b>NMR Spectra .....</b>                                   | <b>56</b> |

## General Information

Unless otherwise stated, all materials were used as received from commercial sources without further purification. All glassware and magnetic stir bars were dried in an oven at 100 °C overnight unless otherwise stated. All solvents were purchased from MilliporeSigma (Sure/Seal™) and used as received. 2-Dram (8-mL) reaction tubes were purchased from Fisher (Cat#: 50976409). Caps with TFE septa were purchased from Chemglass (Cat#: CG-4910-16). Ambient (room) temperature refers to 21–24 °C. Elevated temperatures were maintained by an IKA heating block for 2-dram vials or a silicone oil bath for larger vessels. Thin-layer chromatography (TLC) was performed using EMD Millipore 250 mm silica gel F-254 plates (250 μm) with F-254 fluorescent indicator and visualized by UV fluorescence quenching, iodine, Seebach's stain, or potassium permanganate stain. SiliCycle SiliaFlash P60 silica gel (particle size 40–63 μm) was used for flash chromatography. Analtech thin layer chromatography products (20 cm × 20 cm, 1000 micron) were used for preparative TLC. <sup>1</sup>H, <sup>13</sup>C and <sup>19</sup>F NMR spectra were recorded on a Bruker DRX equipped with a 5 mm DCH cryoprobe (600 MHz, 150 MHz, and 376 MHz, respectively). <sup>1</sup>H NMR spectra were reported relative to Me<sub>4</sub>Si (δ 0.0) unless otherwise stated. <sup>13</sup>C NMR spectra were calibrated to residual solvent signals (CDCl<sub>3</sub> at 77.16 ppm). High-resolution mass spectra (HRMS) were recorded on an Agilent LC/MSD TOF mass spectrometer by electrospray ionization time of flight experiments or atmospheric-pressure chemical ionization time of flight experiments.

## Commercial Suppliers of Chemicals:

The following chemicals were purchased from the suppliers indicated:

Ni(COD)<sub>2</sub>: Strem (1295-35-8)

Tetrahydrofuran: MilliporeSigma (401757-100ML)

All commercial reagents were purchased from MilliporeSigma, Alfa Aesar, Oakwood, TCI or Strem and used as received.

## Table of Substrates

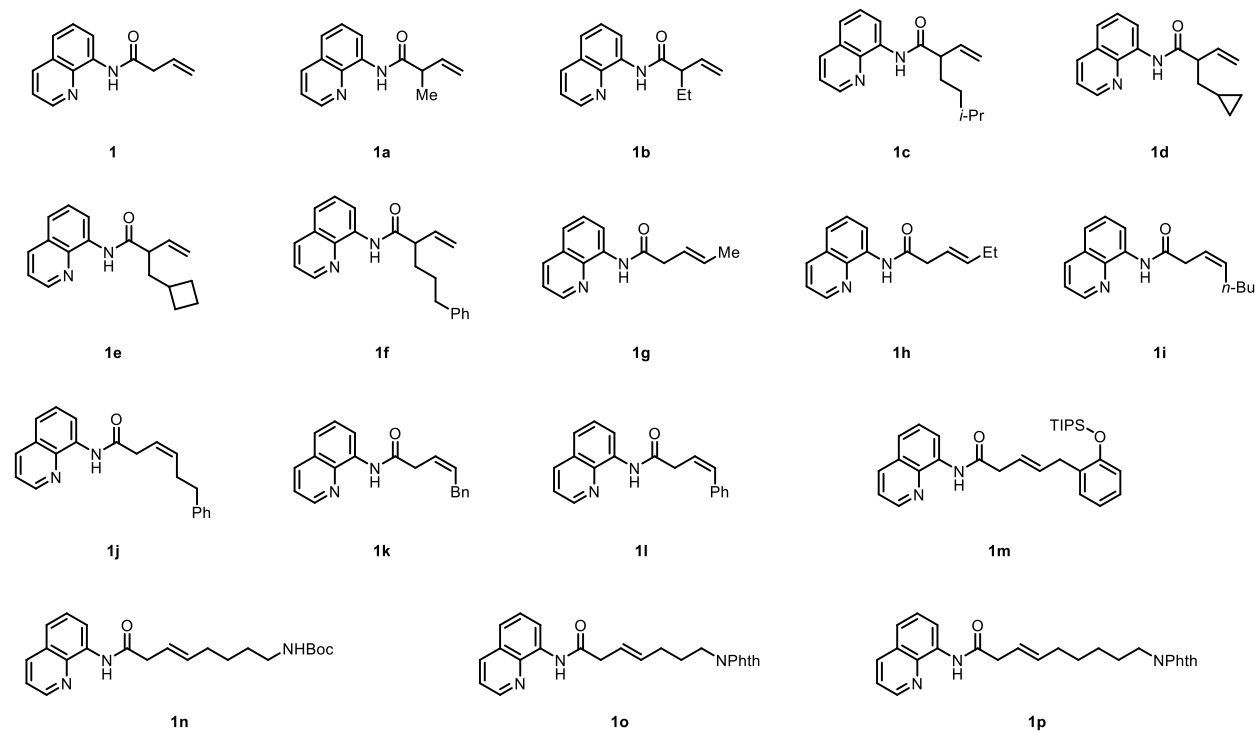

**Scheme S1.** List of alkene substrates used in this study.<sup>1-2</sup>

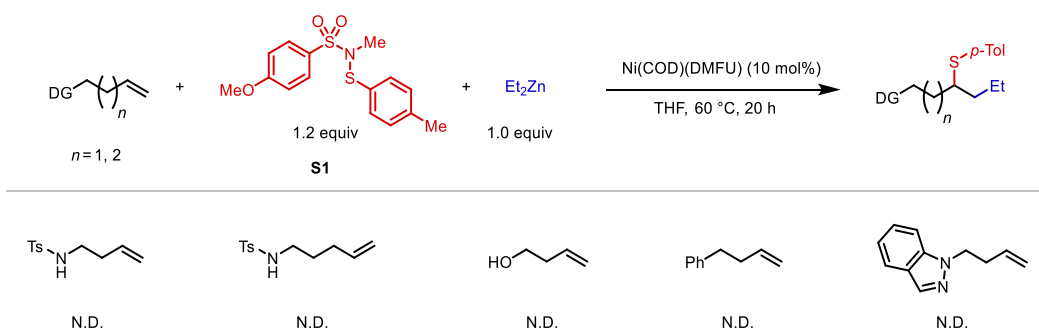

**Scheme S2.** Limitations. N.D. = product not detected.

## Experimental Procedures

### General Procedure A for the Synthesis of N-S Reagents

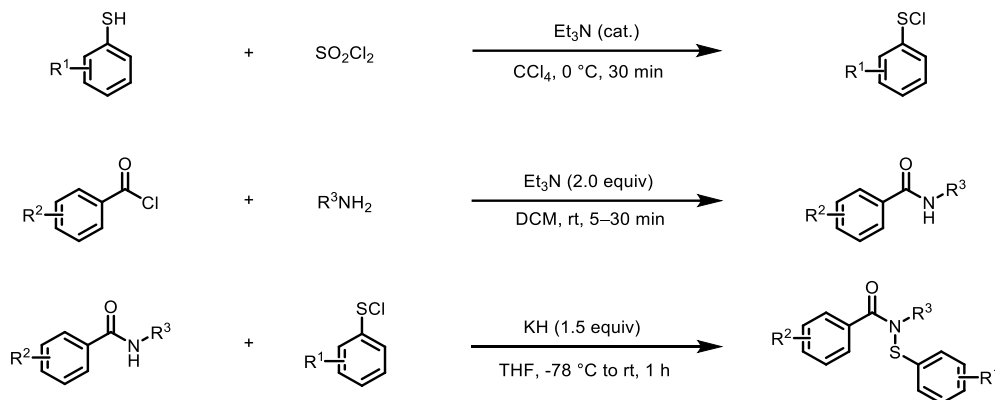

**Synthesis of sulfonyl chlorides:** The reaction was carried out according to a modified literature procedure.<sup>3</sup> To a solution of thiol (100 mmol) in CCl<sub>4</sub> (100 mL) was added triethylamine (3 drops). The solution was cooled to 0 °C. Sulfuryl chloride (110 mmol) was added dropwise. The reaction was kept stirring at 0 °C for an additional 30 min. After this time, the solvent was removed, and the residue was used without further purification.

**Synthesis of *N*-alkylbenzamides:** To a solution of the appropriate benzoyl chloride (1.0 equiv) in DCM (0.7 M) were added triethylamine (2.0 equiv) and the appropriate alkyl amine (1.2 equiv) under 0 °C. The reaction was warmed to room temperature and stirred for an additional 5–30 min, and reaction progress was monitored by TLC. After this time, the reaction was quenched with water. The aqueous solution was extracted with DCM (×3). The combined organic layers were dried over Na<sub>2</sub>SO<sub>4</sub>. The organic solvent was removed under reduced pressure, and the residue was subjected to flash column chromatography on silica gel with hexanes/ethyl acetate as the eluent to afford the product. For the synthesis of *N*-methylbenzamides, an aqueous solution of methylamine was used; in this case, no purification was required before subjecting the residue to the next step.

**Synthesis of N-S reagents:** The reaction was carried out according to a modified literature procedure.<sup>4</sup> To a solution of *N*-alkylbenzamide (5 mmol) in THF (10 mL) was added KH (1.5 equiv). The reaction mixture was stirred at room temperature for 1 h. After this time, solution of ArSCl in THF (5 mL) was added dropwise at -78 °C until a light-yellow color persisted, suggesting the reaction had reached completion. The reaction was allowed to warm to room temperature and continue stirring for an additional 1 h, and reaction progress was monitored by TLC. After this time, the reaction was quenched with water. The aqueous solution was extracted with DCM (×3). The combined organic layers were dried over Na<sub>2</sub>SO<sub>4</sub>. The organic solvent was removed under reduced pressure, and the residue was subjected to flash column chromatography on silica gel with hexanes/ethyl acetate as the eluent to afford the product.

### Large-scale synthesis of S10:

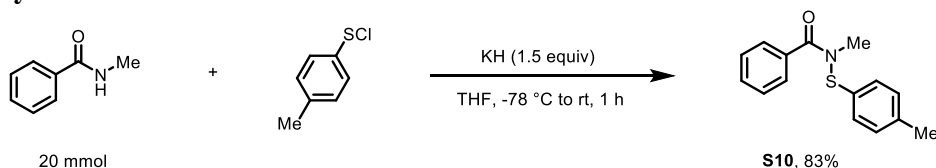

Following General Procedure A, **S10** was prepared on 20 mmol scale with 83% isolated yield.



## General Procedure B for Nickel-catalyzed Carbosulfenylation

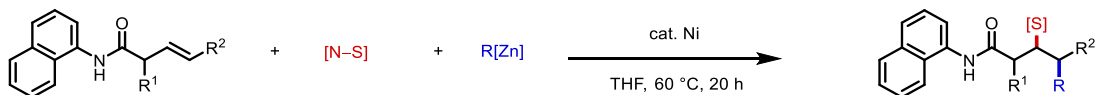

Outside of the glovebox, to an oven-dried 1-dram (4-mL) reaction tube equipped with a magnetic stir bar were added the appropriate alkene (0.1 mmol) and N-S reagent (0.12 mmol). The vial was then introduced into an argon-filled glovebox antechamber. Once transferred inside the glovebox, Ni(COD)(DMFU)<sup>5</sup> (3.1 mg, 10 mol%) or Ni(COD)<sub>2</sub> (2.8 mg, 10 mol%) was added to the vial, followed by THF (1.0 mL). The vial was sealed with a screw-top septum cap and removed from the glovebox. The dialkylzinc reagent (0.1 mmol, 1 M in THF) or alkylzinc bromide (0.1 mmol, 0.5 M in THF) was added dropwise over the course of 15 min as the reaction vessel was heated to 60 °C while stirring. The reaction was left to stir at 60 °C for 30 min. After this time, N-S reagent (0.06 mmol, 0.6 M in THF) was added in one portion followed by dropwise addition of dialkylzinc reagent (0.05 mmol, 1 M in THF) or alkylzinc bromide (0.05 mmol, 0.5 M in THF) over the course of 10 min. Following addition of the reagents, the septum cap was sealed with grease. The reaction was left to stir at 60 °C for 20 h. After this time, the reaction was diluted with saturated NaHCO<sub>3</sub> solution (10 mL). The aqueous solution was then extracted with ethyl acetate (3 × 2 mL). The combined organic layers were dried by passage through a pad of silica gel with ethyl acetate as eluent. The filtrate was concentrated and purified by preparative thin-layer chromatography (PTLC) to furnish the desired product.

## Large-Scale Experiment

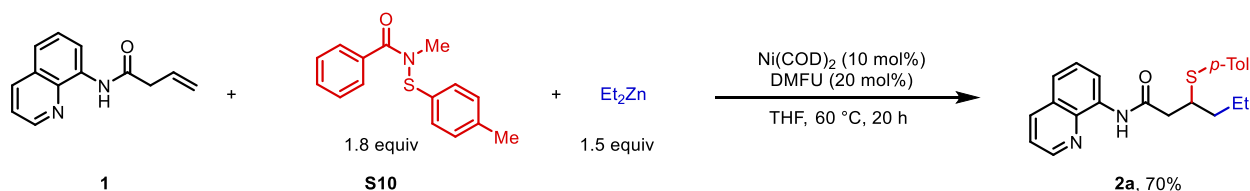

Outside of the glovebox, to an oven-dried 100-mL round-bottom flask equipped with a magnetic stir bar were added alkene **1** (530 mg, 2.5 mmol), N-S reagent (770 mg, 3.0 mmol), and DMFU (72 mg, 0.5 mmol). The vial was then introduced into an argon-filled glovebox antechamber. Once transferred inside the glovebox, Ni(COD)<sub>2</sub> (69 mg, 0.25 mmol) and THF (20 mL) were added to the flask. The flask was sealed with a septum cap, removed from the glovebox and then equipped with a nitrogen-filled balloon. The dialkylzinc reagent (2.5 mmol, 1 M in THF) was added dropwise over the course of 20 min as the reaction vessel was heated to 60 °C while stirring. The reaction was left to stir at 60 °C for 30 min. After this time, the N-S reagent (1.5 mmol, 0.6 M in THF) was added in one portion followed by dropwise addition of dialkylzinc reagent (1.25 mmol, 1 M in THF) over the course of 15 min. The reaction was left to stir at 60 °C for 20 h. After this time, the reaction was concentrated, and the crude residue was purified by column chromatography to furnish the desired product **2a** in 70% yield (639 mg).

## Optimization of Reaction Conditions for Carbosulfenylation Using Et<sub>2</sub>Zn as Nucleophile

Using **S1** as a benchmark, the reaction conditions were optimized under the following standard conditions:

Outside of the glovebox, to an oven-dried 1-dram (4-mL) reaction tube equipped with a magnetic stir bar were added alkene **1** (21.2 mg, 0.1 mmol) and **S1** (40 mg, 0.12 mmol). The vial was then introduced into an argon-filled glovebox antechamber. Once transferred inside the glovebox, the appropriate nickel catalyst<sup>6</sup> (0.01 mmol) and solvent (1.0 mL) were added to the vial. The vial was sealed with a screw-top septum cap and removed from the glovebox. Diethylzinc (0.1 mL, 0.1 mmol) was added dropwise over the course of 15 min at 60 °C while stirring. After the addition, the septum cap was sealed with grease. The reaction was left to stir at 60 °C for 20 h.

**Table S1: Optimization of Reaction Conditions for Carbosulfenylation Using Et<sub>2</sub>Zn as Nucleophile<sup>a</sup>**

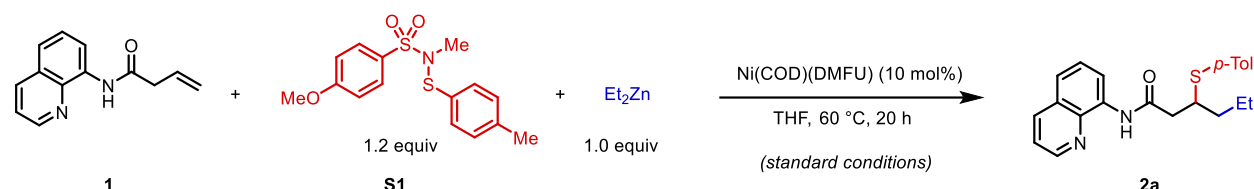

| Entry | Deviation from Standard Condition                                                        | Yield (%) ( <b>1/2a</b> ) <sup>b</sup> |
|-------|------------------------------------------------------------------------------------------|----------------------------------------|
| 1     | None                                                                                     | 22/76                                  |
| 2     | Adding Et <sub>2</sub> Zn at room temperature dropwise then heating to 60°C              | 40/56                                  |
| 3     | Ni(COD) <sub>2</sub> + DMFU (20 mol%) in place of Ni(COD)(DMFU)                          | 24/72                                  |
| 4     | Other Ni precatalysts                                                                    | See below                              |
| 5     | 2.0 equiv <b>S1</b> in place of 1.2 equiv                                                | 27/72                                  |
| 6     | 1.2 equiv Et <sub>2</sub> Zn in place of 1.0 equiv                                       | 12/76                                  |
| 7     | 2-MeTHF in place of THF                                                                  | 12/26                                  |
| 8     | Dioxane in place of THF                                                                  | 26/74                                  |
| 9     | DMF in place of THF                                                                      | 25/48                                  |
| 10    | Toluene in place of THF                                                                  | 32/66                                  |
| 11    | Portionwise (General Procedure B): <b>S1</b> (1.2 + 0.6), Et <sub>2</sub> Zn (1.0 + 0.5) | 8/82                                   |

<sup>a</sup>The reactions were performed on 0.1 mmol scale. <sup>b</sup>Yields were determined by <sup>1</sup>H NMR analysis of the crude reaction mixture with CH<sub>2</sub>Br<sub>2</sub> as internal standard.

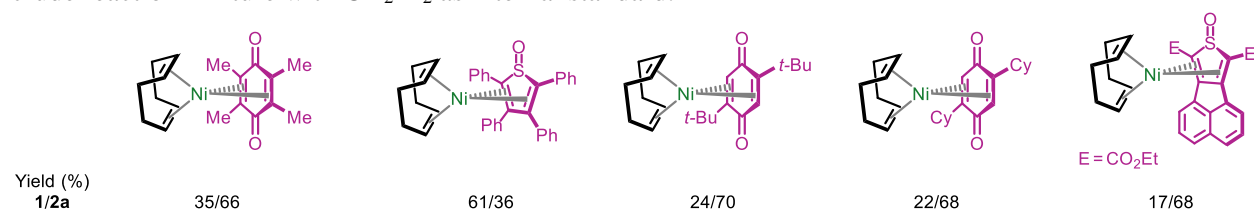

## Comparison Between Batchwise and Single-batch Addition with **S10** as Electrophile

Using General Procedure B, a series of sulfenylating agents were evaluated (see manuscript Table 1), with **S10** giving the best yield.<sup>7</sup> The following experiments were performed with **S10** to test the importance of portionwise addition. In all cases diethylzinc solution was added in a dropwise fashion.

**Table S2: Comparison Between Batchwise and Single-batch Addition with **S10** as Electrophile<sup>a</sup>**

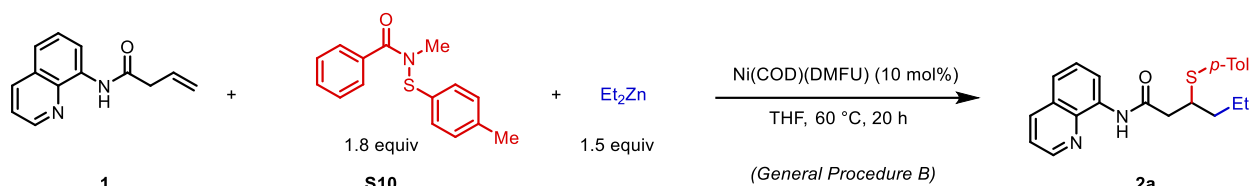

| Entry | Deviation from General Procedure B                                           | Yield (%) ( <b>1/2a</b> ) <sup>b</sup> |
|-------|------------------------------------------------------------------------------|----------------------------------------|
| 1     | None (batchwise): <b>S10</b> (1.2 + 0.6), $\text{Et}_2\text{Zn}$ (1.0 + 0.5) | 2/90                                   |
| 2     | Single-batch: <b>S10</b> (1.8), $\text{Et}_2\text{Zn}$ (1.5)                 | 12/78                                  |
| 3     | Single-batch: <b>S10</b> (1.8), $\text{Et}_2\text{Zn}$ (1.2)                 | 6/80                                   |
| 4     | Single-batch: <b>S10</b> (1.8), $\text{Et}_2\text{Zn}$ (1.0)                 | 10/80                                  |
| 5     | Single-batch: <b>S10</b> (1.5), $\text{Et}_2\text{Zn}$ (1.0)                 | 10/78                                  |

<sup>a</sup>The reactions were performed on 0.1 mmol scale. <sup>b</sup>Yields were determined by <sup>1</sup>H NMR analysis of the crude reaction mixture with  $\text{CH}_2\text{Br}_2$  as internal standard.

### Comparison between **S10**, **S23**, **S25**, and Corresponding Aryldisulfides

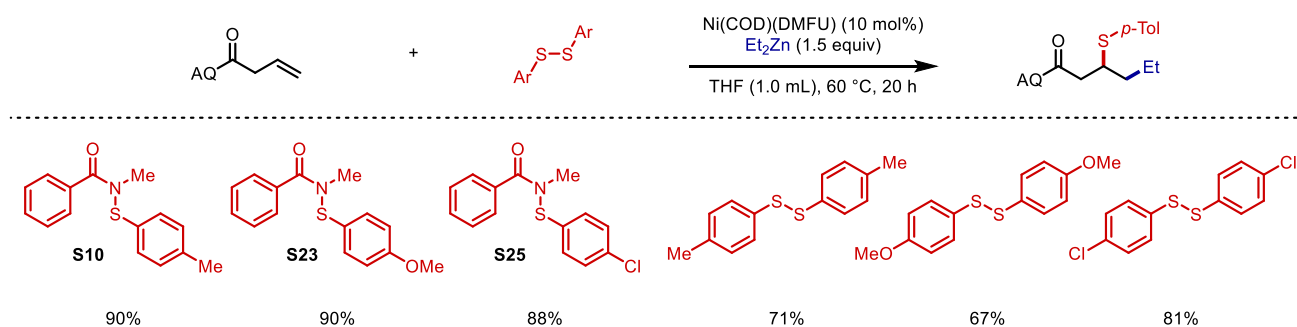

### Optimization of Reaction Conditions for Carbosulfenylation Using Alkylzinc Bromide as Nucleophile

Using (3-ethoxy-3-oxopropyl)zinc bromide or cyclohexylzinc bromide as nucleophile, we briefly optimized the reaction condition according to General Procedure B.

**Table S3: Optimization of Reaction Conditions for Carbosulfenylation Using Alkylzinc Bromide as Nucleophile<sup>a</sup>**

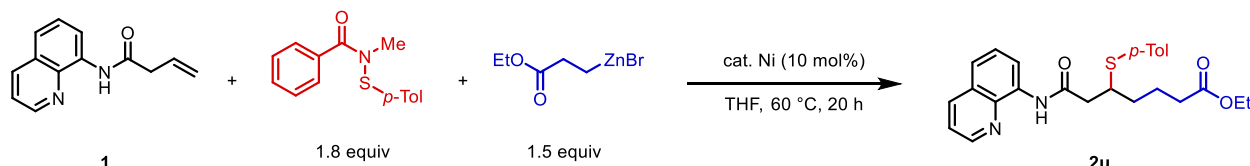

| Entry | Ni catalysts                         | Yield% ( <b>1/2u</b> ) <sup>b</sup> |
|-------|--------------------------------------|-------------------------------------|
| 1     | $\text{Ni}(\text{COD})(\text{DMFU})$ | 46/18                               |
| 2     | $\text{Ni}(\text{COD})_2$            | 26/32                               |
| 3     | $\text{NiBr}_2$                      | 32/18                               |
| 4     | $\text{NiBr}_2\cdot\text{glyme}$     | 25/26                               |
| 5     | $\text{Ni}(\text{acac})_2$           | 41/16                               |

<sup>a</sup>The reactions were performed on 0.1 mmol scale. <sup>b</sup>Yields were determined by <sup>1</sup>H NMR analysis of the crude reaction mixture with  $\text{CH}_2\text{Br}_2$  as internal standard.

**Table S4: Optimization of Reaction Conditions for Carbosulfenylation Using Alkylzinc Bromide as Nucleophile<sup>a</sup>**

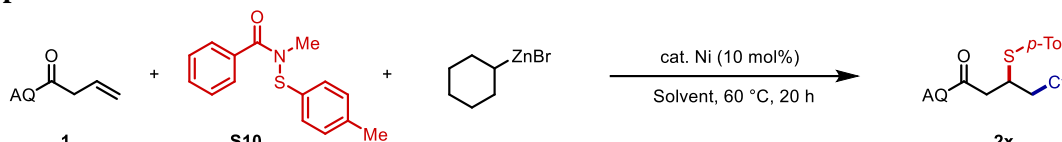

| Entry          | cat. Ni              | Solvent                      | Yield (%) (1/2x) <sup>c</sup> |
|----------------|----------------------|------------------------------|-------------------------------|
| 1              | Ni(COD) <sub>2</sub> | THF (1.0 mL)                 | 47/18                         |
| 2 <sup>b</sup> | Ni(COD) <sub>2</sub> | THF (1.0 mL)                 | trace/trace                   |
| 3              | Ni(COD)(DQ)          | THF (1.0 mL)                 | 59/10                         |
| 4              | Ni(COD)(DMFU)        | THF (1.0 mL)                 | 55/14                         |
| 5              | Ni(COD) <sub>2</sub> | THF (1.0 mL) + MeCN (0.1 mL) | 70/6                          |
| 6              | Ni(COD) <sub>2</sub> | THF (0.6 mL)                 | 53/14                         |
| 7              | Ni(COD) <sub>2</sub> | THF (1.5 mL)                 | 42/20                         |

<sup>a</sup>The reactions were performed on 0.1 mmol scale. <sup>b</sup>Cy<sub>2</sub>Zn in place of CyZnBr. <sup>c</sup>Yields were determined by <sup>1</sup>H NMR analysis of the crude reaction mixture with CH<sub>2</sub>Br<sub>2</sub> as internal standard.

### Reactions of Internal Alkene **1g** with **S18** and **S19** as Electrophiles

Using **1g** as alkene substrate and **S18** or **S19** as the electrophile, the following experiments were carried out following General Procedure B. Yields and diastereoselectivities were determined by <sup>1</sup>H NMR analysis of the crude reaction mixture with CH<sub>2</sub>Br<sub>2</sub> as internal standard.

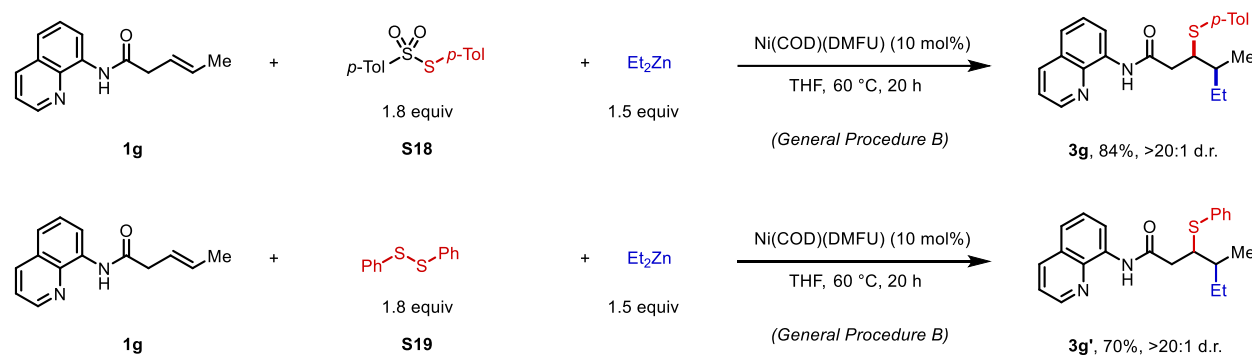

**Scheme S3.** Reactions of Internal Alkene **1g** with **S18** and **S19** as Electrophiles

## Representative Procedures and Analytical Data

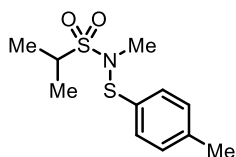

***N*-methyl-*N*-(*p*-tolylthio)propane-2-sulfonamide (S6):** The reaction was carried out following a literature procedure<sup>8</sup> using *N*-methylpropane-2-sulfonamide (685 mg, 5 mmol), 4-methylbenzenesulfonyl chloride, triethylamine (1.4 mL, 10 mmol), and CCl<sub>4</sub> (10 mL). The reaction was run for 30 min at room temperature, and the product was purified by column chromatography using silica gel to afford **S6** as a white solid. <sup>1</sup>H NMR (600 MHz, CDCl<sub>3</sub>) δ 7.47–7.42 (m, 2H), 7.20–7.17 (m, 2H), 3.52 (hept, *J* = 6.9 Hz, 1H), 3.30 (s, 3H), 2.35 (s, 3H), 1.38 (d, *J* = 6.9 Hz, 6H). <sup>13</sup>C NMR (151 MHz, CDCl<sub>3</sub>) δ 138.91, 132.56, 130.04, 128.91, 53.45, 42.78, 21.31, 16.72. HRMS (ESI-TOF) Calcd for C<sub>11</sub>H<sub>18</sub>NO<sub>2</sub>S<sub>2</sub><sup>+</sup> [M+H] 260.0779, found 260.0770.

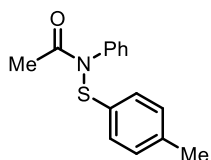

***N*-phenyl-*N*-(*p*-tolylthio)acetamide (S8):** The reaction was carried out following General Procedure A using *N*-phenylacetamide (675 mg, 5 mmol), 4-methylbenzenesulfonyl chloride, KH (300 mg, 7.5 mmol), and THF (10 mL). The reaction was run for 1 h at room temperature, and the product was purified by column chromatography using silica gel to afford **S8** as a white solid. <sup>1</sup>H NMR (600 MHz, CDCl<sub>3</sub>) δ 7.35–7.29 (m, 2H), 7.28–7.24 (m, 3H), 7.18–7.11 (m, 4H), 2.35–2.18 (m, 6H). <sup>13</sup>C NMR (151 MHz, CDCl<sub>3</sub>) δ 174.10, 145.17, 138.41, 133.75, 130.00, 129.25, 128.27, 127.54, 126.99, 22.97, 21.19. HRMS (ESI-TOF) Calcd for C<sub>15</sub>H<sub>16</sub>NOS<sup>+</sup> [M+H] 258.0953, found 258.0949.

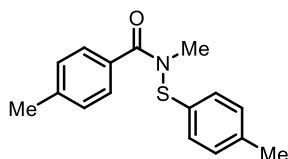

***N*,4-dimethyl-*N*-(*p*-tolylthio)benzamide (S11):** The reaction was carried out following General Procedure A using *N*,4-dimethylbenzamide (745 mg, 5 mmol), 4-methylbenzenesulfonyl chloride, KH (300 mg, 7.5 mmol), and THF (10 mL). The reaction was run for 1 h at room temperature, and the product was purified by column chromatography using silica gel to afford **S11** as a white solid. <sup>1</sup>H NMR (600 MHz, CDCl<sub>3</sub>) δ 7.45–7.41 (m, 2H), 7.17–7.12 (m, 4H), 7.03 (d, *J* = 7.8 Hz, 2H), 3.38 (s, 3H), 2.36 (s, 3H), 2.33 (s, 3H). <sup>13</sup>C NMR (151 MHz, CDCl<sub>3</sub>) δ 176.66, 140.68, 137.56, 133.84, 132.36, 130.20, 128.59, 128.03, 125.79, 40.65, 21.61, 21.19. HRMS (ESI-TOF) Calcd for C<sub>16</sub>H<sub>18</sub>NOS<sup>+</sup> [M+H] 272.1109, found 272.1104.

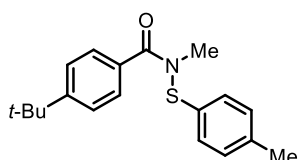

**4-(*tert*-butyl)-*N*-methyl-*N*-(*p*-tolylthio)benzamide (S12):** The reaction was carried out following General Procedure A using 4-(*tert*-butyl)-*N*-methylbenzamide (955 mg, 5 mmol), 4-methylbenzenesulfonyl chloride, KH (300 mg, 7.5 mmol), and THF (10 mL). The reaction was run for 1 h at room temperature, and the product was purified by column chromatography using silica gel to afford **S12** as a white solid. <sup>1</sup>H NMR (600 MHz, CDCl<sub>3</sub>) δ 7.50–7.45 (m, 2H), 7.38–7.33 (m, 2H), 7.17–7.12 (m, 2H), 7.06–7.01 (m, 2H), 3.38 (s, 3H), 2.32 (s, 3H), 1.30 (s, 9H). <sup>13</sup>C NMR (151 MHz, CDCl<sub>3</sub>) δ 176.52, 153.72, 137.45, 133.91, 132.23, 130.17, 127.86, 125.69, 124.85, 40.58, 34.94, 31.28, 21.16. HRMS (ESI-TOF) Calcd for C<sub>19</sub>H<sub>24</sub>NOS<sup>+</sup> [M+H] 314.1579, found 314.1577.

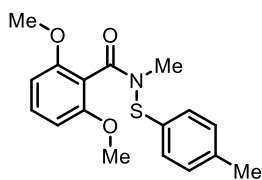

**2,6-dimethoxy-*N*-methyl-*N*-(*p*-tolylthio)benzamide (S14):** The reaction was carried out following General Procedure A using 2,6-dimethoxy-*N*-methylbenzamide (975 mg, 5 mmol), 4-methylbenzenesulfonyl chloride, KH (300 mg, 7.5 mmol), and THF (10 mL). The reaction was run for 1 h at room temperature, and the product was purified by column chromatography using silica gel to afford **S14** as a white solid. <sup>1</sup>H NMR (600 MHz, CDCl<sub>3</sub>) δ 7.23 (t, *J* = 8.4 Hz, 1H), 7.09 (s, 4H), 6.50 (d, *J* = 8.4 Hz, 2H), 3.74 (s, 6H), 3.41 (s, 3H), 2.31 (s, 3H). <sup>13</sup>C NMR (151 MHz, CDCl<sub>3</sub>) δ 172.45, 156.77, 136.93, 133.76, 130.26, 129.69, 129.55, 126.19, 103.62, 55.62, 38.74, 21.05. HRMS (ESI-TOF) Calcd for C<sub>17</sub>H<sub>20</sub>NO<sub>3</sub>S<sup>+</sup> [M+H] 318.1164, found 318.1163.

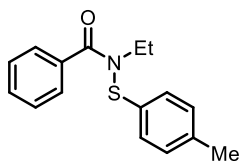

***N*-ethyl-*N*-(*p*-tolylthio)benzamide (S15):** The reaction was carried out following General Procedure A using *N*-ethylbenzamide (745 mg, 5 mmol), 4-methylbenzenesulfonyl chloride, KH (300 mg, 7.5 mmol), and THF (10 mL). The reaction was run for 1 h at room temperature, and the product was purified by column chromatography using silica gel to afford **S15** as a white solid.  $^1\text{H NMR}$  (600 MHz,  $\text{CDCl}_3$ )  $\delta$  7.52–7.47 (m, 2H), 7.35–7.31 (m, 1H), 7.30–7.24 (m, 2H), 6.80 (qd,  $J = 1.5, 0.9$  Hz, 2H), 6.68 (s, 2H), 3.78 (q,  $J = 7.1$  Hz, 2H), 2.33 (s, 3H), 1.31 (t,  $J = 7.1$  Hz, 3H).  $^{13}\text{C NMR}$  (151 MHz,  $\text{CDCl}_3$ )  $\delta$  176.20, 138.99, 136.97, 135.10, 130.07, 128.73, 127.63, 127.45, 121.73, 40.39, 21.21. **HRMS** (ESI-TOF) Calcd for  $\text{C}_{16}\text{H}_{18}\text{NOS}^+$  [ $\text{M}+\text{H}$ ] 272.1109, found 272.1107.

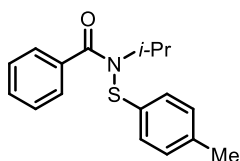

***N*-isopropyl-*N*-(*p*-tolylthio)benzamide (S16):** The reaction was carried out following General Procedure A using *N*-isopropylbenzamide (815 mg, 5 mmol), 4-methylbenzenesulfonyl chloride, KH (300 mg, 7.5 mmol), and THF (10 mL). The reaction was run for 1 h at room temperature, and the product was purified by column chromatography using silica gel to afford **S16** as a white solid.  $^1\text{H NMR}$  (600 MHz,  $\text{CDCl}_3$ )  $\delta$  7.49–7.45 (m, 2H), 7.39–7.33 (m, 1H), 7.33–7.29 (m, 2H), 7.07 (t,  $J = 7.2$  Hz, 4H), 4.89 (s, 1H), 2.29 (s, 3H), 1.23 (d,  $J = 6.6$  Hz, 6H).  $^{13}\text{C NMR}$  (151 MHz,  $\text{CDCl}_3$ )  $\delta$  176.83, 136.77, 136.71, 136.49, 129.87, 129.77, 127.94, 127.30, 124.88, 51.76, 21.20, 21.12. **HRMS** (ESI-TOF) Calcd for  $\text{C}_{17}\text{H}_{20}\text{NOS}^+$  [ $\text{M}+\text{H}$ ] 286.1266, found 286.1268.

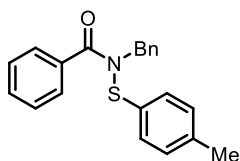

***N*-benzyl-*N*-(*p*-tolylthio)benzamide (S17):** The reaction was carried out following General Procedure A using *N*-benzylbenzamide (1.1 g, 5 mmol), 4-methylbenzenesulfonyl chloride, KH (300 mg, 7.5 mmol), and THF (10 mL). The reaction was run for 1 h at room temperature, and the product was purified by column chromatography using silica gel to afford **S17** as a white solid.  $^1\text{H NMR}$  (600 MHz,  $\text{CDCl}_3$ )  $\delta$  7.53–7.49 (m, 2H), 7.42–7.38 (m, 1H), 7.38–7.29 (m, 7H), 7.14–7.10 (m, 2H), 6.99 (d,  $J = 7.9$  Hz, 2H), 4.90 (s, 2H), 2.33 (s, 3H).  $^{13}\text{C NMR}$  (151 MHz,  $\text{CDCl}_3$ )  $\delta$  176.43, 137.71, 137.42, 135.48, 133.64, 130.36, 130.18, 128.86, 128.67, 127.97, 127.83, 127.80, 126.17, 54.10, 21.22. **HRMS** (ESI-TOF) Calcd for  $\text{C}_{21}\text{H}_{20}\text{NOS}^+$  [ $\text{M}+\text{H}$ ] 334.1266, found 334.1263.

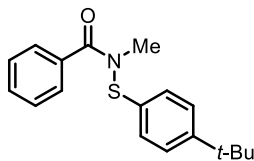

***N*-((4-*tert*-butyl)phenylthio)-*N*-methylbenzamide (S22):** The reaction was carried out following General Procedure A using *N*-methylbenzamide (675 mg, 5 mmol), 4-(*tert*-butyl)-benzenesulfonyl chloride, KH (300 mg, 7.5 mmol), and THF (10 mL). The reaction was run for 1 h at room temperature, and the product was purified by column chromatography using silica gel to afford **S22** as a white solid.  $^1\text{H NMR}$  (600 MHz,  $\text{CDCl}_3$ )  $\delta$  7.55–7.50 (m, 2H), 7.42–7.38 (m, 1H), 7.37–7.32 (m, 4H), 7.06 (d,  $J = 8.2$  Hz, 2H), 3.40 (s, 3H), 1.30 (s, 9H).  $^{13}\text{C NMR}$  (151 MHz,  $\text{CDCl}_3$ )  $\delta$  176.57, 150.90, 135.39, 133.67, 130.33, 127.93, 127.89, 126.51, 125.62, 40.53, 34.70, 31.35. **HRMS** (ESI-TOF) Calcd for  $\text{C}_{18}\text{H}_{22}\text{NOS}^+$  [ $\text{M}+\text{H}$ ] 300.1422, found 300.1414.

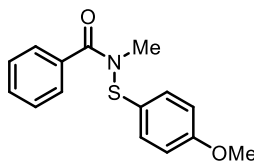

***N*-((4-methoxyphenyl)thio)-*N*-methylbenzamide (S23):** The reaction was carried out following General Procedure A using *N*-methylbenzamide (675 mg, 5 mmol), 4-methoxybenzenesulfonyl chloride, KH (300 mg, 7.5 mmol), and THF (10 mL). The reaction was run for 1 h at room temperature, and the product was purified by column chromatography using silica gel to afford **S23** as a white solid.  $^1\text{H NMR}$  (600 MHz,  $\text{CDCl}_3$ )  $\delta$  7.54–7.50 (m, 2H), 7.45–7.41 (m, 1H), 7.40–7.36 (m, 2H), 7.15 (d,  $J = 8.3$  Hz, 2H), 6.88–6.82 (m, 2H), 3.79 (s, 3H), 3.35 (s, 3H).  $^{13}\text{C NMR}$  (151 MHz,  $\text{CDCl}_3$ )  $\delta$  176.46, 160.45, 135.76, 131.48, 130.26, 128.15, 127.96, 127.08, 114.96, 55.52, 40.35. **HRMS** (ESI-TOF) Calcd for  $\text{C}_{15}\text{H}_{16}\text{NO}_2\text{S}^+$  [ $\text{M}+\text{H}$ ] 274.0902, found 274.0901.

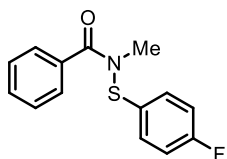

***N*-((4-fluorophenyl)thio)-*N*-methylbenzamide (S24):** The reaction was carried out following General Procedure A using *N*-methylbenzamide (675 mg, 5 mmol), 4-fluorobenzenesulfonyl chloride, KH (300 mg, 7.5 mmol), and THF (10 mL). The reaction was run for 1 h at room temperature, and the product was purified by column chromatography using silica gel to afford **S24** as a white solid.  $^1\text{H NMR}$  (600 MHz,  $\text{CDCl}_3$ )  $\delta$  7.52–7.47 (m, 2H), 7.46–7.41 (m, 1H), 7.40–7.34 (m, 2H), 7.13 (t,  $J = 6.9$  Hz, 2H), 7.08–7.01 (m, 2H), 3.39 (s, 3H).  $^{13}\text{C NMR}$  (151 MHz,  $\text{CDCl}_3$ )  $\delta$  176.43, 163.40, 135.22, 132.20 (d,  $J_{\text{C-F}} = 3.4$  Hz), 130.51, 128.85, 128.04, 127.89, 116.71 (d,  $J_{\text{C-F}} = 22.4$  Hz), 40.64.  $^{19}\text{F NMR}$  (471 MHz,  $\text{CDCl}_3$ )  $\delta$  -113.56. **HRMS** (ESI-TOF) Calcd for  $\text{C}_{14}\text{H}_{13}\text{FNOS}^+$  [ $\text{M}+\text{H}$ ] 262.0702, found 262.0703.

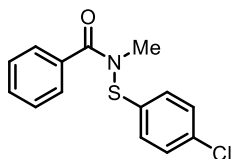

***N*-((4-chlorophenyl)thio)-*N*-methylbenzamide (S25):** The reaction was carried out following General Procedure A using *N*-methylbenzamide (675 mg, 5 mmol), 4-chlorobenzenesulfonyl chloride, KH (300 mg, 7.5 mmol), and THF (10 mL). The reaction was run for 1 h at room temperature, and the product was purified by column chromatography using silica gel to afford **S25** as a white solid.  $^1\text{H NMR}$  (600 MHz,  $\text{CDCl}_3$ )  $\delta$  7.50–7.45 (m, 2H), 7.42–7.36 (m, 1H), 7.35–7.26 (m, 4H), 7.01 (d,  $J = 8.2$  Hz, 2H), 3.40 (s, 3H).  $^{13}\text{C NMR}$  (151 MHz,  $\text{CDCl}_3$ )  $\delta$  176.21, 135.98, 134.85, 133.00, 130.46, 129.56, 127.92, 127.54, 125.88, 40.56. **HRMS** (ESI-TOF) Calcd for  $\text{C}_{14}\text{H}_{13}\text{ClNOS}^+$  [ $\text{M}+\text{H}$ ] 278.0406, found 278.0406.

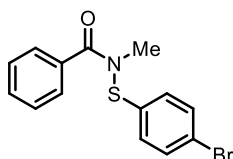

***N*-((4-bromophenyl)thio)-*N*-methylbenzamide (S26):** The reaction was carried out following General Procedure A using *N*-methylbenzamide (675 mg, 5 mmol), 4-bromobenzenesulfonyl chloride, KH (300 mg, 7.5 mmol), and THF (10 mL). The reaction was run for 1 h at room temperature, and the product was purified by column chromatography using silica gel to afford **S26** as a white solid.  $^1\text{H NMR}$  (600 MHz,  $\text{CDCl}_3$ )  $\delta$  7.50–7.45 (m, 4H), 7.44–7.39 (m, 1H), 7.36–7.32 (m, 2H), 6.97 (d,  $J = 8.3$  Hz, 2H), 3.42 (s, 3H).  $^{13}\text{C NMR}$  (151 MHz,  $\text{CDCl}_3$ )  $\delta$  176.41, 136.82, 134.90, 132.58, 130.59, 128.04, 127.61, 125.97, 120.89, 40.65. **HRMS** (ESI-TOF) Calcd for  $\text{C}_{14}\text{H}_{13}\text{BrNOS}^+$  [ $\text{M}+\text{H}$ ] 321.9901, found 321.9898.

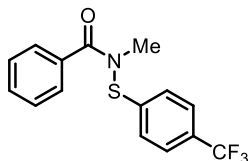

***N*-methyl-*N*-((4-(trifluoromethyl)phenyl)thio)benzamide (S27):** The reaction was carried out following General Procedure A using *N*-methylbenzamide (675 mg, 5 mmol), 4-trifluoromethylbenzenesulfonyl chloride, KH (300 mg, 7.5 mmol), and THF (10 mL). The reaction was run for 1 h at room temperature, and the product was purified by column chromatography using silica gel to afford **S27** as a white solid.  $^1\text{H NMR}$  (600 MHz,  $\text{CDCl}_3$ )  $\delta$  7.62–7.57 (m, 2H), 7.51–7.45 (m, 2H), 7.45–7.39 (m, 1H), 7.33 (dd,  $J = 8.3, 6.9$  Hz, 2H), 7.15 (d,  $J = 8.2$  Hz, 2H), 3.46 (s, 3H).  $^{13}\text{C NMR}$  (151 MHz,  $\text{CDCl}_3$ )  $\delta$  176.35, 143.12, 134.60 (d,  $J_{\text{C-F}} = 2.2$  Hz), 130.76 (d,  $J_{\text{C-F}} = 2.1$  Hz), 128.63 (q,  $J_{\text{C-F}} = 32.6$  Hz), 128.11 (d,  $J_{\text{C-F}} = 2.2$  Hz), 127.46 (d,  $J_{\text{C-F}} = 2.1$  Hz), 126.44 (q,  $J_{\text{C-F}} = 4.2, 3.6$  Hz), 124.02 (q,  $J_{\text{C-F}} = 271.7$  Hz), 122.68, 40.70.  $^{19}\text{F NMR}$  (471 MHz,  $\text{CDCl}_3$ )  $\delta$  -62.74. **HRMS** (ESI-TOF) Calcd for  $\text{C}_{15}\text{H}_{13}\text{F}_3\text{NOS}^+$  [ $\text{M}+\text{H}$ ] 312.0670, found 312.0670.

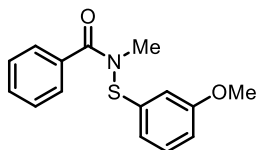

***N*-((3-methoxyphenyl)thio)-*N*-methylbenzamide (S28):** The reaction was carried out following General Procedure A using *N*-methylbenzamide (675 mg, 5 mmol), 3-methoxybenzenesulfonyl chloride, KH (300 mg, 7.5 mmol), and THF (10 mL). The reaction was run for 1 h at room temperature, and the product was purified by column chromatography using silica gel to afford **S28** as a white solid.  $^1\text{H NMR}$  (600 MHz,  $\text{CDCl}_3$ )  $\delta$  7.52–7.46 (m, 2H), 7.39–7.34 (m, 1H), 7.32–7.27 (m, 2H), 7.23 (t,  $J = 8.0$  Hz, 1H), 6.72 (ddd,  $J = 8.3, 2.5, 0.9$  Hz, 1H), 6.67 (dd,  $J = 7.8, 1.8$  Hz, 1H), 6.60 (d,  $J = 2.4$  Hz, 1H), 3.73 (s, 3H), 3.41 (s, 3H).  $^{13}\text{C NMR}$  (151 MHz,  $\text{CDCl}_3$ )  $\delta$  176.28, 160.33, 138.92, 135.01, 130.30, 130.28, 127.79, 127.51, 116.06, 112.46, 109.29, 55.23, 40.56. **HRMS** (ESI-TOF) Calcd for  $\text{C}_{15}\text{H}_{16}\text{NO}_2\text{S}^+$  [ $\text{M}+\text{H}$ ] 274.0902, found 274.0906.

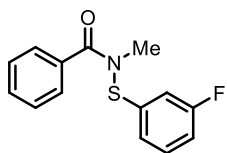

***N*-((3-fluorophenyl)thio)-*N*-methylbenzamide (S29):** The reaction was carried out following General Procedure A using *N*-methylbenzamide (675 mg, 5 mmol), 3-fluorobenzenesulfonyl chloride, KH (300 mg, 7.5 mmol), and THF (10 mL). The reaction was run for 1 h at room temperature, and the product was purified by column chromatography using silica gel to afford **S29** as a white solid. **<sup>1</sup>H NMR** (600 MHz, CDCl<sub>3</sub>) δ 7.51–7.46 (m, 2H), 7.44–7.40 (m, 1H), 7.37–7.28 (m, 3H), 6.90 (tdd, *J* = 8.4, 2.5, 0.9 Hz, 1H), 6.85 (dt, *J* = 7.9, 1.3 Hz, 1H), 6.80 (dt, *J* = 9.1, 2.1 Hz, 1H), 3.45 (s, 3H). **<sup>13</sup>C NMR** (151 MHz, CDCl<sub>3</sub>) δ 176.39, 163.41 (d, *J*<sub>C-F</sub> = 249.9 Hz), 140.37 (d, *J*<sub>C-F</sub> = 7.2 Hz), 134.83, 131.00 (d, *J*<sub>C-F</sub> = 8.7 Hz), 130.61, 128.04, 127.55, 119.14, 113.78 (d, *J*<sub>C-F</sub> = 21.5 Hz), 110.73 (d, *J*<sub>C-F</sub> = 24.6 Hz), 40.76. **<sup>19</sup>F NMR** (471 MHz, CDCl<sub>3</sub>) δ -110.99. **HRMS** (ESI-TOF) Calcd for C<sub>14</sub>H<sub>13</sub>FNOS<sup>+</sup> [M+H] 262.0702, found 262.0702.

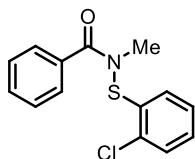

***N*-((2-chlorophenyl)thio)-*N*-methylbenzamide (S30):** The reaction was carried out following General Procedure A using *N*-methylbenzamide (675 mg, 5 mmol), 2-chlorobenzenesulfonyl chloride, KH (300 mg, 7.5 mmol), and THF (10 mL). The reaction was run for 1 h at room temperature, and the product was purified by column chromatography using silica gel to afford **S30** as a white solid. **<sup>1</sup>H NMR** (600 MHz, CDCl<sub>3</sub>) δ 7.49–7.46 (m, 2H), 7.40 (ddt, *J* = 8.8, 7.1, 1.3 Hz, 1H), 7.37–7.28 (m, 4H), 7.15 (ddd, *J* = 8.0, 7.4, 1.5 Hz, 1H), 7.07 (dd, *J* = 7.9, 1.5 Hz, 1H), 3.45 (s, 3H). **<sup>13</sup>C NMR** (151 MHz, CDCl<sub>3</sub>) δ 176.54, 137.13, 134.57, 130.69, 130.11, 128.02, 127.80, 127.45, 126.96, 122.88, 40.45. **HRMS** (ESI-TOF) Calcd for C<sub>14</sub>H<sub>13</sub>ClNOS<sup>+</sup> [M+H] 278.0406, found 278.0407.

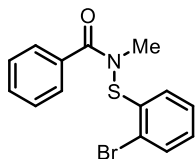

***N*-((2-bromophenyl)thio)-*N*-methylbenzamide (S31):** The reaction was carried out following General Procedure A using *N*-methylbenzamide (675 mg, 5 mmol), 2-bromobenzenesulfonyl chloride, KH (300 mg, 7.5 mmol), and THF (10 mL). The reaction was run for 1 h at room temperature, and the product was purified by column chromatography using silica gel to afford **S31** as a white solid. **<sup>1</sup>H NMR** (600 MHz, CDCl<sub>3</sub>) δ 7.50–7.44 (m, 3H), 7.43–7.37 (m, 2H), 7.31 (dd, *J* = 8.4, 7.0 Hz, 2H), 7.10–7.02 (m, 2H), 3.46 (s, 3H). **<sup>13</sup>C NMR** (151 MHz, CDCl<sub>3</sub>) δ 176.51, 138.97, 134.55, 133.28, 130.72, 128.39, 128.04, 127.46, 127.13, 122.86, 116.34, 40.41. **HRMS** (ESI-TOF) Calcd for C<sub>14</sub>H<sub>13</sub>BrNOS<sup>+</sup> [M+H] 321.9901, found 321.9897.

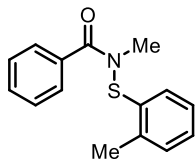

***N*-methyl-*N*-(*o*-tolylthio)benzamide (S32):** The reaction was carried out following General Procedure A using *N*-methylbenzamide (675 mg, 5 mmol), 2-methylbenzenesulfonyl chloride, KH (300 mg, 7.5 mmol), and THF (10 mL). The reaction was run for 1 h at room temperature, and the product was purified by column chromatography using silica gel to afford **S32** as a white solid. **<sup>1</sup>H NMR** (600 MHz, CDCl<sub>3</sub>) δ 7.51–7.46 (m, 2H), 7.39 (ddt, *J* = 8.0, 6.9, 1.3 Hz, 1H), 7.32–7.29 (m, 2H), 7.28–7.26 (m, 1H), 7.14–7.08 (m, 3H), 3.43 (s, 3H), 2.07 (s, 3H). **<sup>13</sup>C NMR** (151 MHz, CDCl<sub>3</sub>) δ 176.59, 136.65, 135.06, 132.82, 130.76, 130.39, 127.89, 127.49, 127.02, 126.16, 122.36, 40.55, 18.68. **HRMS** (ESI-TOF) Calcd for C<sub>15</sub>H<sub>16</sub>NOS<sup>+</sup> [M+H] 258.0953, found 258.0954.

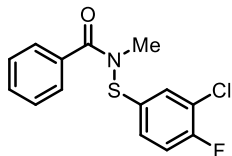

***N*-((3-chloro-4-fluorophenyl)thio)-*N*-methylbenzamide (S33):** The reaction was carried out following General Procedure A using *N*-methylbenzamide (675 mg, 5 mmol), 3-chloro-4-fluorobenzenesulfonyl chloride, KH (300 mg, 7.5 mmol), and THF (10 mL). The reaction was run for 1 h at room temperature, and the product was purified by column chromatography using silica gel to afford **S33** as a white solid. **<sup>1</sup>H NMR** (600 MHz, CDCl<sub>3</sub>) δ 7.48 (d, *J* = 7.6 Hz, 2H), 7.39 (t, *J* = 7.4 Hz, 1H), 7.33 (t, *J* = 7.5 Hz, 2H), 7.14–7.11 (m, 1H), 7.08 (t, *J* = 8.6 Hz, 1H), 6.97 (d, *J* = 8.2 Hz, 1H), 3.38 (s, 3H). **<sup>13</sup>C NMR** (151 MHz, CDCl<sub>3</sub>) δ 175.92, 157.39 (d, *J*<sub>C-F</sub> = 250.3 Hz), 134.75, 133.79 (d, *J*<sub>C-F</sub> = 3.8 Hz), 130.53, 127.98, 127.71, 127.65, 125.62 (d, *J*<sub>C-F</sub> = 7.0 Hz), 122.23 (d, *J*<sub>C-F</sub> = 18.6 Hz), 117.62 (d, *J*<sub>C-F</sub> = 22.0 Hz), 40.66. **<sup>19</sup>F NMR** (471 MHz, CDCl<sub>3</sub>) δ -116.23. **HRMS** (ESI-TOF) Calcd for C<sub>14</sub>H<sub>12</sub>ClFNO<sup>+</sup> [M+H] 296.0312, found 296.0310.



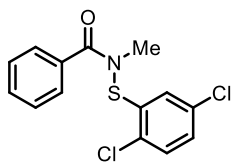

***N*-((2,5-dichlorophenyl)thio)-*N*-methylbenzamide (S34):** The reaction was carried out following General Procedure A using *N*-methylbenzamide (675 mg, 5 mmol), 2,5-dichlorobenzenesulfonyl chloride, KH (300 mg, 7.5 mmol), and THF (10 mL). The reaction was run for 1 h at room temperature, and the product was purified by column chromatography using silica gel to afford **S34** as a white solid. <sup>1</sup>H NMR (600 MHz, CDCl<sub>3</sub>) δ 7.49–7.45 (m, 2H), 7.43–7.38 (m, 1H), 7.32 (t, *J* = 7.6 Hz, 2H), 7.19 (dd, *J* = 8.4, 1.3 Hz, 1H), 7.09 (ddd, *J* = 8.3, 2.4, 1.1 Hz, 1H), 7.02 (d, *J* = 2.3 Hz, 1H), 3.45 (s, 3H). <sup>13</sup>C NMR (151 MHz, CDCl<sub>3</sub>) δ 176.00, 139.04, 134.24, 134.15, 131.05, 130.80, 128.10, 127.30, 126.98, 125.75, 122.38, 40.55. HRMS (ESI-TOF) Calcd for C<sub>14</sub>H<sub>12</sub>Cl<sub>2</sub>NOS<sup>+</sup> [M+H] 312.0017, found 312.0013.

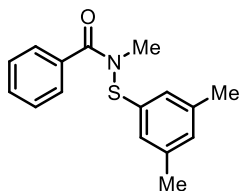

***N*-((3,5-dimethylphenyl)thio)-*N*-methylbenzamide (S35):** The reaction was carried out following General Procedure A using *N*-methylbenzamide (675 mg, 5 mmol), 3,5-dimethylbenzenesulfonyl chloride, KH (300 mg, 7.5 mmol), and THF (10 mL). The reaction was run for 1 h at room temperature, and the product was purified by column chromatography using silica gel to afford **S35** as a white solid. <sup>1</sup>H NMR (600 MHz, CDCl<sub>3</sub>) δ 7.52–7.47 (m, 2H), 7.35–7.31 (m, 1H), 7.30–7.24 (m, 2H), 6.80 (qd, *J* = 1.5, 0.9 Hz, 1H), 6.68 (s, 2H), 3.40 (s, 3H), 2.24 (s, 6H). <sup>13</sup>C NMR (151 MHz, CDCl<sub>3</sub>) δ 176.20, 138.99, 136.97, 135.10, 130.07, 128.73, 127.63, 127.45, 121.73, 40.39, 21.21. HRMS (ESI-TOF) Calcd for C<sub>16</sub>H<sub>18</sub>NOS<sup>+</sup> [M+H] 272.1109, found 272.1109.

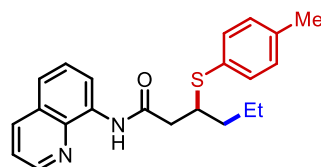

***N*-(quinolin-8-yl)-3-(*p*-tolylthio)hexanamide (2a):** The reaction was carried out following General Procedure B using **1** (21.2 mg, 0.1 mmol), **S10** (53.8 mg, 1.8 mmol), diethylzinc (0.15 mmol, 1.0 M in toluene), Ni(COD)(DMFU) (3.1 mg, 0.01 mmol), and THF (1.0 mL). The reaction was run for 20 h at 60 °C, and the product was purified by preparative thin-layer chromatography (PTLC) to afford 30.9 mg (85%) of **2a** as a colorless oil. <sup>1</sup>H NMR (600 MHz, CDCl<sub>3</sub>) δ 9.88 (s, 1H), 8.80 (dd, *J* = 4.2, 1.7 Hz, 1H), 8.75 (dd, *J* = 7.3, 1.7 Hz, 1H), 8.15 (dd, *J* = 8.3, 1.7 Hz, 1H), 7.55–7.47 (m, 2H), 7.44 (dd, *J* = 8.3, 4.2 Hz, 1H), 7.42–7.39 (m, 2H), 7.10–7.05 (m, 2H), 3.69–3.64 (m, 1H), 2.80 (dd, *J* = 14.9, 6.8 Hz, 1H), 2.72 (dd, *J* = 14.9, 6.9 Hz, 1H), 2.28 (s, 3H), 1.75–1.68 (m, 1H), 1.68–1.61 (m, 2H), 1.60–1.52 (m, 1H), 0.94 (t, *J* = 7.1 Hz, 3H). <sup>13</sup>C NMR (151 MHz, CDCl<sub>3</sub>) δ 169.63, 148.25, 138.47, 137.58, 136.44, 134.52, 133.57, 130.38, 129.83, 128.04, 127.50, 121.72, 121.65, 116.68, 45.77, 44.15, 36.94, 21.20, 20.36, 13.98. HRMS (ESI-TOF) Calcd for C<sub>22</sub>H<sub>25</sub>N<sub>2</sub>OS<sup>+</sup> [M+H] 365.1688, found 365.1680.

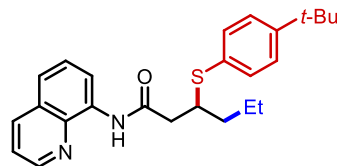

**3-((4-(*tert*-butyl)phenyl)thio)-*N*-(quinolin-8-yl)hexanamide (2b):** The reaction was carried out following General Procedure B using **1** (21.2 mg, 0.1 mmol), **S22** (53.8 mg, 1.8 mmol), diethylzinc (0.15 mmol, 1.0 M in toluene), Ni(COD)(DMFU) (3.1 mg, 0.01 mmol), and THF (1.0 mL). The reaction was run for 20 h at 60 °C, and the product was purified by preparative thin-layer chromatography (PTLC) to afford 36.1 mg (89%) of **2b** as a colorless oil. <sup>1</sup>H NMR (600 MHz, CDCl<sub>3</sub>) δ 9.90 (s, 1H), 8.81 (dd, *J* = 4.2, 1.7 Hz, 1H), 8.75 (dd, *J* = 7.2, 1.8 Hz, 1H), 8.15 (dd, *J* = 8.3, 1.7 Hz, 1H), 7.53–7.48 (m, 2H), 7.46–7.42 (m, 3H), 7.30–7.27 (m, 2H), 3.70 (dtd, *J* = 7.8, 6.7, 5.2 Hz, 1H), 2.83 (dd, *J* = 14.9, 6.6 Hz, 1H), 2.73 (dd, *J* = 15.0, 7.1 Hz, 1H), 1.78–1.71 (m, 1H), 1.70–1.63 (m, 2H), 1.62–1.53 (m, 1H), 1.27 (s, 9H), 0.95 (t, *J* = 7.2 Hz, 3H). <sup>13</sup>C NMR (151 MHz, CDCl<sub>3</sub>) δ 169.67, 150.62, 148.26, 138.49, 136.46, 134.53, 132.94, 130.58, 128.05, 127.52, 126.10, 121.73, 121.65, 116.69, 45.51, 44.30, 36.95, 34.63, 31.36, 20.39, 14.00. HRMS (ESI-TOF) Calcd for C<sub>25</sub>H<sub>31</sub>N<sub>2</sub>OS<sup>+</sup> [M+H] 407.2157, found 407.2155.

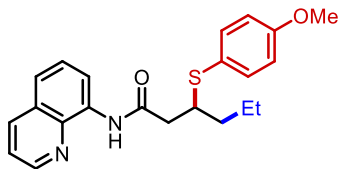

**3-((4-methoxyphenyl)thio)-N-(quinolin-8-yl)hexanamide (2c):** The reaction was carried out following General Procedure B using **1** (21.2 mg, 0.1 mmol), **S23** (49.1 mg, 1.8 mmol), diethylzinc (0.15 mmol, 1.0 M in toluene), Ni(COD)(DMFU) (3.1 mg, 0.01 mmol), and THF (1.0 mL). The reaction was run for 20 h at 60 °C, and the product was purified by preparative thin-layer chromatography (PTLC) to afford 34.2 mg (90%) of **2c** as a colorless oil. <sup>1</sup>H NMR (600 MHz, CDCl<sub>3</sub>) δ 9.89 (s, 1H), 8.81 (dd, *J* = 4.2, 1.7 Hz, 1H), 8.76 (dd, *J* = 7.3, 1.7 Hz, 1H), 8.15 (dd, *J* = 8.3, 1.7 Hz, 1H), 7.54–7.49 (m, 2H), 7.48–7.47 (m, 2H), 7.45 (dd, *J* = 8.2, 4.2 Hz, 1H), 6.83–6.79 (m, 2H), 3.75 (s, 3H), 3.59–3.53 (m, 1H), 2.76 (dd, *J* = 14.9, 7.1 Hz, 1H), 2.70 (dd, *J* = 14.9, 6.7 Hz, 1H), 1.72–1.52 (m, 4H), 0.94 (t, *J* = 7.0 Hz, 3H). <sup>13</sup>C NMR (151 MHz, CDCl<sub>3</sub>) δ 169.67, 159.74, 148.26, 138.48, 136.46, 136.26, 134.53, 128.05, 127.52, 124.08, 121.73, 121.64, 116.70, 114.62, 55.38, 46.46, 44.12, 36.88, 20.35, 13.98. HRMS (ESI-TOF) Calcd for C<sub>22</sub>H<sub>25</sub>N<sub>2</sub>O<sub>2</sub>S<sup>+</sup> [M+H] 381.1637, found 381.1632.

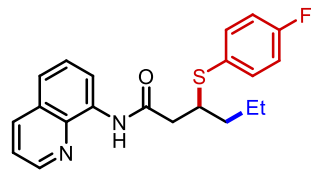

**3-((4-fluorophenyl)thio)-N-(quinolin-8-yl)hexanamide (2d):** The reaction was carried out following General Procedure B using **1** (21.2 mg, 0.1 mmol), **S24** (47.0 mg, 1.8 mmol), diethylzinc (0.15 mmol, 1.0 M in toluene), Ni(COD)(DMFU) (3.1 mg, 0.01 mmol), and THF (1.0 mL). The reaction was run for 20 h at 60 °C, and the product was purified by preparative thin-layer chromatography (PTLC) to afford 31.3 mg (85%) of **2d** as a colorless oil. <sup>1</sup>H NMR (600 MHz, CDCl<sub>3</sub>) δ 9.87 (s, 1H), 8.81 (dd, *J* = 4.2, 1.7 Hz, 1H), 8.74 (dd, *J* = 7.1, 1.9 Hz, 1H), 8.16 (dd, *J* = 8.2, 1.7 Hz, 1H), 7.55–7.47 (m, 4H), 7.46 (dd, *J* = 8.2, 4.2 Hz, 1H), 7.00–6.92 (m, 2H), 3.67–3.61 (m, 1H), 2.81–2.71 (m, 2H), 1.75–1.68 (m, 1H), 1.68–1.60 (m, 2H), 1.60–1.52 (m, 1H), 0.94 (t, *J* = 7.2 Hz, 3H). <sup>13</sup>C NMR (151 MHz, CDCl<sub>3</sub>) δ 169.43, 162.59 (d, *J*<sub>C-F</sub> = 247.7 Hz), 148.29, 138.44, 136.52, 135.67 (d, *J*<sub>C-F</sub> = 8.3 Hz), 134.39, 129.20 (d, *J*<sub>C-F</sub> = 3.3 Hz), 128.06, 127.51, 121.79, 121.77, 116.74, 116.13 (d, *J*<sub>C-F</sub> = 21.5 Hz), 46.42, 44.12, 37.05, 20.32, 13.95. <sup>19</sup>F NMR (376 MHz, CDCl<sub>3</sub>) δ -116.72. HRMS (ESI-TOF) Calcd for C<sub>21</sub>H<sub>22</sub>FN<sub>2</sub>OS<sup>+</sup> [M+H] 369.1437, found 369.1431.

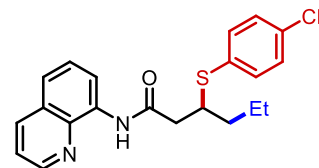

**3-((4-chlorophenyl)thio)-N-(quinolin-8-yl)hexanamide (2e):** The reaction was carried out following General Procedure B using **1** (21.2 mg, 0.1 mmol), **S25** (50.0 mg, 1.8 mmol), diethylzinc (0.15 mmol, 1.0 M in toluene), Ni(COD)(DMFU) (3.1 mg, 0.01 mmol), and THF (1.0 mL). The reaction was run for 20 h at 60 °C, and the product was purified by preparative thin-layer chromatography (PTLC) to afford 30.3 mg (79%) of **2e** as a colorless oil. <sup>1</sup>H NMR (600 MHz, CDCl<sub>3</sub>) δ 9.86 (s, 1H), 8.80 (dd, *J* = 4.2, 1.7 Hz, 1H), 8.73 (dd, *J* = 7.1, 1.9 Hz, 1H), 8.16 (dd, *J* = 8.3, 1.7 Hz, 1H), 7.55–7.48 (m, 2H), 7.46 (dd, *J* = 8.2, 4.2 Hz, 1H), 7.44–7.38 (m, 2H), 7.24–7.18 (m, 2H), 3.72 (dtd, *J* = 7.9, 6.8, 5.4 Hz, 1H), 2.83–2.71 (m, 2H), 1.79–1.70 (m, 1H), 1.70–1.59 (m, 2H), 1.59–1.50 (m, 1H), 0.94 (t, *J* = 7.3 Hz, 3H). <sup>13</sup>C NMR (151 MHz, CDCl<sub>3</sub>) δ 169.29, 148.30, 138.43, 136.51, 134.36, 134.00, 133.42, 133.08, 129.19, 128.06, 127.51, 121.81, 121.77, 116.71, 45.85, 44.17, 37.13, 20.35, 13.96. HRMS (ESI-TOF) Calcd for C<sub>21</sub>H<sub>22</sub>ClN<sub>2</sub>OS<sup>+</sup> [M+H] 385.1141, found 385.1134.

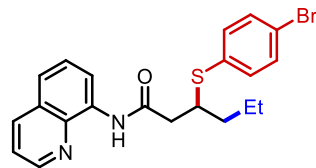

**3-((4-bromophenyl)thio)-N-(quinolin-8-yl)hexanamide (2f):** The reaction was carried out following General Procedure B using **1** (21.2 mg, 0.1 mmol), **S26** (57.8 mg, 1.8 mmol), diethylzinc (0.15 mmol, 1.0 M in toluene), Ni(COD)(DMFU) (3.1 mg, 0.01 mmol), and THF (1.0 mL). The reaction was run for 20 h at 60 °C, and the product was purified by preparative thin-layer chromatography (PTLC) to afford 33.4 mg (78%) of **2f** as a colorless oil. <sup>1</sup>H NMR (600 MHz, CDCl<sub>3</sub>) δ 9.86 (s, 1H), 8.80 (dd, *J* = 4.2, 1.7 Hz, 1H), 8.73 (dd, *J* = 7.1, 1.9 Hz, 1H), 8.16 (dd, *J* = 8.3, 1.7 Hz, 1H), 7.61–7.49 (m, 1H), 7.46 (dd, *J* = 8.2, 4.2 Hz, 1H), 7.35 (d, *J* = 1.5 Hz, 3H), 3.74 (dtd, *J* = 7.9, 6.9, 5.4 Hz, 1H), 2.83–2.71 (m, 2H), 1.80–1.69 (m, 1H), 1.70–1.59 (m, 2H), 1.58–1.49 (m, 1H), 0.94 (t, *J* = 7.2 Hz, 3H). <sup>13</sup>C NMR (151 MHz, CDCl<sub>3</sub>) δ 169.27, 148.30, 138.43, 136.51, 134.35,

134.11, 133.81, 132.11, 128.06, 127.52, 121.82, 121.77, 121.39, 116.72, 45.70, 44.18, 37.14, 20.36, 13.97. **HRMS** (ESI-TOF) Calcd for  $C_{21}H_{22}BrN_2OS^+$  [M+H] 429.0636, found 429.0632.

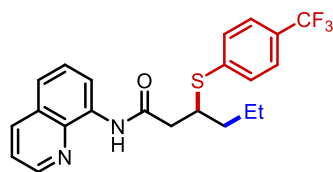

**N-(quinolin-8-yl)-3-((4-(trifluoromethyl)phenyl)thio)hexanamide (2g):** The reaction was carried out following General Procedure B using **1** (21.2 mg, 0.1 mmol), **S27** (56.0 mg, 1.8 mmol), diethylzinc (0.15 mmol, 1.0 M in toluene), Ni(COD)(DMFU) (3.1 mg, 0.01 mmol), and THF (1.0 mL). The reaction was run for 20 h at 60 °C, and the product was purified by preparative thin-layer chromatography (PTLC) to afford 25.1 mg (60%) of **2g** as a colorless oil. **<sup>1</sup>H NMR** (600 MHz, CDCl<sub>3</sub>) δ 9.86 (s, 1H), 8.79 (dd, *J* = 4.2, 1.7 Hz, 1H), 8.71 (dd, *J* = 6.1, 2.9 Hz, 1H), 8.16 (dd, *J* = 8.2, 1.7 Hz, 1H), 7.54–7.50 (m, 4H), 7.48–7.44 (m, 3H), 3.91 (dtd, *J* = 8.1, 6.8, 5.3 Hz, 1H), 2.89–2.79 (m, 2H), 1.81 (ddt, *J* = 14.0, 10.1, 5.7 Hz, 1H), 1.75–1.67 (m, 1H), 1.63 (dddd, *J* = 13.1, 10.2, 7.6, 3.9 Hz, 1H), 1.56 (dddd, *J* = 13.2, 10.2, 7.3, 5.9 Hz, 1H), 0.95 (t, *J* = 7.3 Hz, 3H). **<sup>13</sup>C NMR** (151 MHz, CDCl<sub>3</sub>) δ 169.10, 148.32, 140.65 (d, *J*<sub>C-F</sub> = 1.4 Hz), 138.42, 136.53, 134.29, 130.54, 128.47 (q, *J*<sub>C-F</sub> = 32.5 Hz), 128.06, 127.49, 125.80 (q, *J*<sub>C-F</sub> = 3.9 Hz), 124.20 (q, *J*<sub>C-F</sub> = 271.8 Hz), 121.88, 121.80, 116.71, 44.68, 44.25, 37.23, 20.39, 13.97. **<sup>19</sup>F NMR** (376 MHz, CDCl<sub>3</sub>) δ –65.19. **HRMS** (ESI-TOF) Calcd for  $C_{22}H_{22}F_3N_2OS^+$  [M+H] 419.1405, found 419.1402.

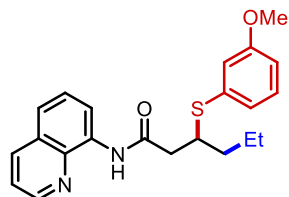

**3-((3-methoxyphenyl)thio)-N-(quinolin-8-yl)hexanamide (2h):** The reaction was carried out following General Procedure B using **1** (21.2 mg, 0.1 mmol), **S28** (49.1 mg, 1.8 mmol), diethylzinc (0.15 mmol, 1.0 M in toluene), Ni(COD)(DMFU) (3.1 mg, 0.01 mmol), and THF (1.0 mL). The reaction was run for 20 h at 60 °C, and the product was purified by preparative thin-layer chromatography (PTLC) to afford 23.9 mg (63%) of **2h** as a colorless oil. **<sup>1</sup>H NMR** (600 MHz, CDCl<sub>3</sub>) δ 9.89 (s, 1H), 8.80 (dd, *J* = 4.2, 1.7 Hz, 1H), 8.75 (dd, *J* = 7.1, 1.9 Hz, 1H), 8.16 (dd, *J* = 8.2, 1.7 Hz, 1H), 7.55–7.48 (m, 2H), 7.46 (dd, *J* = 8.2, 4.2 Hz, 1H), 7.18 (dd, *J* = 8.3, 7.6 Hz, 1H), 7.08 (ddd, *J* = 7.6, 1.6, 0.9 Hz, 1H), 7.04 (dd, *J* = 2.5, 1.6 Hz, 1H), 6.75 (ddd, *J* = 8.3, 2.6, 1.0 Hz, 1H), 3.78 (dtd, *J* = 8.0, 6.8, 5.2 Hz, 1H), 3.75 (s, 3H), 2.85 (dd, *J* = 14.9, 6.6 Hz, 1H), 2.77 (dd, *J* = 15.0, 7.1 Hz, 1H), 1.81–1.73 (m, 1H), 1.72–1.61 (m, 2H), 1.59–1.53 (m, 1H), 0.94 (t, *J* = 7.3 Hz, 3H). **<sup>13</sup>C NMR** (151 MHz, CDCl<sub>3</sub>) δ 169.54, 159.89, 148.30, 138.49, 136.47, 135.83, 134.50, 129.86, 128.06, 127.52, 124.55, 121.76, 121.71, 117.48, 116.70, 113.20, 55.38, 45.28, 44.20, 37.05, 20.39, 14.02. **HRMS** (ESI-TOF) Calcd for  $C_{22}H_{25}N_2O_2S^+$  [M+H] 381.1637, found 381.1628.

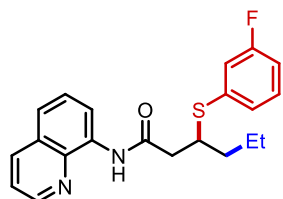

**3-((3-fluorophenyl)thio)-N-(quinolin-8-yl)hexanamide (2i):** The reaction was carried out following General Procedure B using **1** (21.2 mg, 0.1 mmol), **S29** (47.0 mg, 1.8 mmol), diethylzinc (0.15 mmol, 1.0 M in toluene), Ni(COD)(DMFU) (3.1 mg, 0.01 mmol), and THF (1.0 mL). The reaction was run for 20 h at 60 °C, and the product was purified by preparative thin-layer chromatography (PTLC) to afford 25.0 mg (68%) of **2i** as a colorless oil. **<sup>1</sup>H NMR** (600 MHz, CDCl<sub>3</sub>) δ 9.89 (s, 1H), 8.81 (dd, *J* = 4.2, 1.7 Hz, 1H), 8.75 (dd, *J* = 7.0, 2.0 Hz, 1H), 8.16 (dd, *J* = 8.2, 1.7 Hz, 1H), 7.54–7.49 (m, 2H), 7.45 (dd, *J* = 8.2, 4.2 Hz, 1H), 7.27–7.24 (m, 1H), 7.24–7.19 (m, 2H), 6.91–6.86 (m, 1H), 3.80 (dtd, *J* = 8.0, 6.8, 5.4 Hz, 1H), 2.83 (dd, *J* = 15.0, 6.7 Hz, 1H), 2.79 (dd, *J* = 15.0, 6.9 Hz, 1H), 1.78 (ddt, *J* = 13.7, 9.9, 5.6 Hz, 1H), 1.72–1.59 (m, 2H), 1.59–1.52 (m, 1H), 0.94 (t, *J* = 7.3 Hz, 3H). **<sup>13</sup>C NMR** (151 MHz, CDCl<sub>3</sub>) δ 169.15, 162.71 (d, *J*<sub>C-F</sub> = 248.7 Hz), 148.23, 138.35, 137.12 (d, *J*<sub>C-F</sub> = 7.7 Hz), 136.39, 134.28, 130.18 (d, *J*<sub>C-F</sub> = 8.8 Hz), 127.96, 127.40, 127.35 (d, *J*<sub>C-F</sub> = 3.2 Hz), 121.70, 121.68, 118.57 (d, *J*<sub>C-F</sub> = 22.5 Hz), 116.61, 113.94 (d, *J*<sub>C-F</sub> = 21.0 Hz), 45.28, 43.99, 36.97, 20.26, 13.87. **<sup>19</sup>F NMR** (376 MHz, CDCl<sub>3</sub>) δ –112.10. **HRMS** (ESI-TOF) Calcd for  $C_{21}H_{22}FN_2OS^+$  [M+H] 369.1437, found 369.1433.

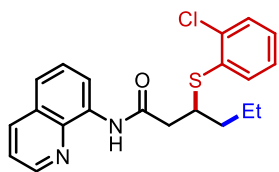

**3-((2-chlorophenyl)thio)-N-(quinolin-8-yl)hexanamide (2j):** The reaction was carried out following General Procedure B using **1** (21.2 mg, 0.1 mmol), **S30** (50.0 mg, 1.8 mmol), diethylzinc (0.15 mmol, 1.0 M in toluene), Ni(COD)(DMFU) (3.1 mg, 0.01 mmol), and THF (1.0 mL). The reaction was run for 20 h at 60 °C, and the product was purified by preparative thin-layer chromatography (PTLC) to afford 22.7 mg (59%) of **2j** as a colorless oil. <sup>1</sup>H NMR (600 MHz, CDCl<sub>3</sub>) δ 9.89 (s, 1H), 8.80 (dd, *J* = 4.2, 1.7 Hz, 1H), 8.72 (dd, *J* = 6.6, 2.4 Hz, 1H), 8.15 (dd, *J* = 8.3, 1.7 Hz, 1H), 7.55 (dd, *J* = 7.9, 1.6 Hz, 1H), 7.53–7.49 (m, 2H), 7.45 (dd, *J* = 8.2, 4.2 Hz, 1H), 7.34 (dd, *J* = 7.9, 1.4 Hz, 1H), 7.18 (td, *J* = 7.6, 1.4 Hz, 1H), 7.10 (td, *J* = 7.7, 1.6 Hz, 1H), 3.95 (tt, *J* = 7.9, 5.5 Hz, 1H), 2.91 (dd, *J* = 15.1, 5.8 Hz, 1H), 2.81 (dd, *J* = 15.1, 7.7 Hz, 1H), 1.83 (ddt, *J* = 13.9, 10.2, 5.5 Hz, 1H), 1.77–1.70 (m, 1H), 1.69–1.62 (m, 1H), 1.58 (dddd, *J* = 13.3, 10.2, 7.3, 5.9 Hz, 1H), 0.94 (t, *J* = 7.3 Hz, 3H). <sup>13</sup>C NMR (151 MHz, CDCl<sub>3</sub>) δ 169.33, 148.33, 138.45, 136.46, 135.50, 134.61, 134.39, 131.67, 130.02, 128.03, 127.56, 127.46, 127.36, 121.79, 121.77, 116.68, 44.11, 43.94, 36.94, 20.35, 14.03. HRMS (ESI-TOF) Calcd for C<sub>21</sub>H<sub>22</sub>ClN<sub>2</sub>OS<sup>+</sup> [M+H] 385.1141, found 385.1140.

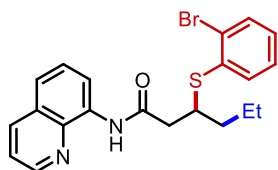

**3-((2-bromophenyl)thio)-N-(quinolin-8-yl)hexanamide (2k):** The reaction was carried out following General Procedure B using **1** (21.2 mg, 0.1 mmol), **S31** (57.8 mg, 1.8 mmol), diethylzinc (0.15 mmol, 1.0 M in toluene), Ni(COD)(DMFU) (3.1 mg, 0.01 mmol), and THF (1.0 mL). The reaction was run for 20 h at 60 °C, and the product was purified by preparative thin-layer chromatography (PTLC) to afford 20.5 mg (48%) of **2k** as a colorless oil. <sup>1</sup>H NMR (600 MHz, CDCl<sub>3</sub>) δ 9.89 (s, 1H), 8.80 (dd, *J* = 4.2, 1.7 Hz, 1H), 8.73 (dd, *J* = 6.7, 2.3 Hz, 1H), 8.15 (dd, *J* = 8.2, 1.7 Hz, 1H), 7.55–7.49 (m, 4H), 7.45 (dd, *J* = 8.2, 4.2 Hz, 1H), 7.24 (td, *J* = 7.6, 1.4 Hz, 1H), 7.01 (td, *J* = 7.6, 1.6 Hz, 1H), 3.95 (tt, *J* = 7.9, 5.4 Hz, 1H), 2.93 (dd, *J* = 15.1, 5.6 Hz, 1H), 2.81 (dd, *J* = 15.2, 7.8 Hz, 1H), 1.84 (ddt, *J* = 14.0, 10.7, 5.6 Hz, 1H), 1.78–1.71 (m, 1H), 1.66 (dddd, *J* = 15.2, 10.3, 7.4, 5.1 Hz, 1H), 1.60–1.54 (m, 1H), 0.95 (t, *J* = 7.3 Hz, 3H). <sup>13</sup>C NMR (151 MHz, CDCl<sub>3</sub>) δ 169.34, 148.34, 138.45, 136.79, 136.47, 134.39, 133.32, 131.12, 128.04, 128.03, 127.54, 127.46, 125.72, 121.81, 121.78, 116.69, 44.22, 44.01, 36.87, 20.37, 14.05. HRMS (ESI-TOF) Calcd for C<sub>21</sub>H<sub>22</sub>BrN<sub>2</sub>OS<sup>+</sup> [M+H] 429.0636, found 429.0631.

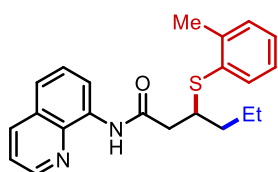

**N-(quinolin-8-yl)-3-(o-tolylthio)hexanamide (2l):** The reaction was carried out following General Procedure B using **1** (21.2 mg, 0.1 mmol), **S32** (46.3 mg, 1.8 mmol), diethylzinc (0.15 mmol, 1.0 M in toluene), Ni(COD)(DMFU) (3.1 mg, 0.01 mmol), and THF (1.0 mL). The reaction was run for 20 h at 60 °C, and the product was purified by preparative thin-layer chromatography (PTLC) to afford 26.2 mg (72%) of **2l** as a colorless oil. <sup>1</sup>H NMR (600 MHz, CDCl<sub>3</sub>) δ 9.88 (s, 1H), 8.79 (dd, *J* = 4.2, 1.7 Hz, 1H), 8.74 (dd, *J* = 7.1, 1.9 Hz, 1H), 8.15 (dd, *J* = 8.3, 1.7 Hz, 1H), 7.54–7.48 (m, 4H), 7.45 (dd, *J* = 8.2, 4.2 Hz, 1H), 7.17–7.11 (m, 2H), 7.09 (td, *J* = 7.3, 1.5 Hz, 1H), 3.81 (tt, *J* = 7.7, 5.6 Hz, 1H), 2.86 (dd, *J* = 15.0, 5.9 Hz, 1H), 2.77 (dd, *J* = 15.0, 7.6 Hz, 1H), 2.42 (s, 3H), 1.81 (ddt, *J* = 13.7, 10.0, 5.6 Hz, 1H), 1.74–1.66 (m, 1H), 1.66–1.54 (m, 2H), 0.94 (t, *J* = 7.3 Hz, 3H). <sup>13</sup>C NMR (151 MHz, CDCl<sub>3</sub>) δ 169.59, 148.27, 139.65, 138.47, 136.46, 134.48, 134.34, 131.58, 130.46, 128.04, 127.51, 126.87, 126.61, 121.74, 121.70, 116.67, 44.32, 44.06, 37.06, 20.91, 20.36, 14.08. HRMS (ESI-TOF) Calcd for C<sub>22</sub>H<sub>25</sub>N<sub>2</sub>OS<sup>+</sup> [M+H] 365.1688, found 365.1682.

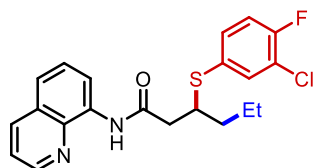

**3-((3-chloro-4-fluorophenyl)thio)-N-(quinolin-8-yl)hexanamide (2m):** The reaction was carried out following General Procedure B using **1** (21.2 mg, 0.1 mmol), **S33** (53.1 mg, 1.8 mmol), diethylzinc (0.15 mmol, 1.0 M in toluene), Ni(COD)(DMFU) (3.1 mg, 0.01 mmol), and THF (1.0 mL). The reaction was run for 20 h at 60 °C, and the product was purified by preparative thin-layer chromatography (PTLC) to afford 30.2 mg (75%) of **2m** as a colorless oil. <sup>1</sup>H NMR (600 MHz, CDCl<sub>3</sub>) δ 9.87 (s, 1H), 8.82 (dd, *J* = 4.2, 1.7 Hz, 1H), 8.73 (dd, *J* = 6.6, 2.4 Hz, 1H), 8.16 (dd, *J* = 8.2, 1.7 Hz, 1H), 7.56 (dd, *J* = 6.9, 2.3 Hz, 1H), 7.53–7.50 (m, 2H), 7.46 (dd, *J* = 8.2, 4.2 Hz, 1H), 7.37 (ddd, *J* = 8.5, 4.5, 2.3 Hz, 1H), 7.01 (t, *J* = 8.7 Hz,



1H), 3.71–3.66 (m, 1H), 2.79 (dd,  $J = 14.3, 5.8$  Hz, 1H), 2.76 (dd,  $J = 14.4, 6.8$  Hz, 1H), 1.77–1.70 (m, 1H), 1.69–1.59 (m, 2H), 1.59–1.52 (m, 1H), 0.95 (t,  $J = 7.3$  Hz, 3H).  $^{13}\text{C NMR}$  (151 MHz,  $\text{CDCl}_3$ )  $\delta$  169.13, 158.61, 148.36, 138.43, 136.53, 135.20, 134.30, 133.21 (d,  $J_{\text{C-F}} = 7.1$  Hz), 130.99 (d,  $J_{\text{C-F}} = 4.3$  Hz), 128.08, 127.50, 121.86, 121.80, 121.41 (d,  $J_{\text{C-F}} = 18.1$  Hz), 117.08 (d,  $J_{\text{C-F}} = 21.4$  Hz), 116.71, 46.65, 44.23, 37.16, 20.33, 13.96.  $^{19}\text{F NMR}$  (376 MHz,  $\text{CDCl}_3$ )  $\delta$  -116.38. **HRMS** (ESI-TOF) Calcd for  $\text{C}_{21}\text{H}_{21}\text{ClFN}_2\text{OS}^+$   $[\text{M}+\text{H}]$  403.1047, found 403.1031.

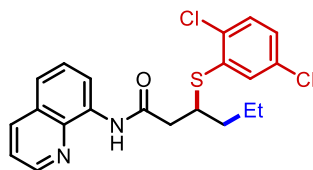

**3-((2,5-dichlorophenyl)thio)-N-(quinolin-8-yl)hexanamide (2n):** The reaction was carried out following General Procedure B using **1** (21.2 mg, 0.1 mmol), **S34** (56.0 mg, 1.8 mmol), diethylzinc (0.15 mmol, 1.0 M in toluene), Ni(COD)(DMFU) (3.1 mg, 0.01 mmol), and THF (1.0 mL). The reaction was run for 20 h at 60 °C, and the product was purified by preparative thin-layer chromatography (PTLC) to afford 20.9 mg (50%) of **2n** as a colorless oil.  $^1\text{H NMR}$  (600 MHz,  $\text{CDCl}_3$ )  $\delta$  9.89 (s, 1H), 8.81 (dd,  $J = 4.2, 1.7$  Hz, 1H), 8.72 (dd,  $J = 6.4, 2.6$  Hz, 1H), 8.16 (dd,  $J = 8.2, 1.7$  Hz, 1H), 7.55–7.50 (m, 3H), 7.46 (dd,  $J = 8.2, 4.2$  Hz, 1H), 7.22 (d,  $J = 8.5$  Hz, 1H), 7.04 (dd,  $J = 8.5, 2.4$  Hz, 1H), 3.98–3.91 (m, 1H), 2.89 (dd,  $J = 15.1, 6.4$  Hz, 1H), 2.84 (dd,  $J = 15.1, 7.1$  Hz, 1H), 1.84 (ddt,  $J = 14.0, 10.2, 5.7$  Hz, 1H), 1.74 (dddd,  $J = 14.1, 10.2, 7.8, 5.1$  Hz, 1H), 1.64 (dddd,  $J = 14.4, 7.0, 5.1, 3.5$  Hz, 1H), 1.61–1.53 (m, 1H), 0.96 (t,  $J = 7.3$  Hz, 3H).  $^{13}\text{C NMR}$  (151 MHz,  $\text{CDCl}_3$ )  $\delta$  168.94, 148.36, 138.45, 136.67, 136.48, 134.31, 133.52, 133.08, 130.87, 130.76, 128.04, 127.49, 127.48, 121.85, 121.79, 116.75, 44.18, 44.10, 36.99, 20.30, 14.03. **HRMS** (ESI-TOF) Calcd for  $\text{C}_{21}\text{H}_{21}\text{Cl}_2\text{N}_2\text{OS}^+$   $[\text{M}+\text{H}]$  419.0752, found 419.0741.

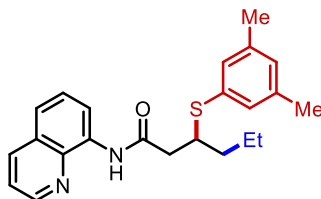

**3-((3,5-dimethylphenyl)thio)-N-(quinolin-8-yl)hexanamide (2o):** The reaction was carried out following General Procedure B using **1** (21.2 mg, 0.1 mmol), **S35** (48.8 mg, 1.8 mmol), diethylzinc (0.15 mmol, 1.0 M in toluene), Ni(COD)(DMFU) (3.1 mg, 0.01 mmol), and THF (1.0 mL). The reaction was run for 20 h at 60 °C, and the product was purified by preparative thin-layer chromatography (PTLC) to afford 24.2 mg (64%) of **2o** as a white solid.  $^1\text{H NMR}$  (600 MHz,  $\text{CDCl}_3$ )  $\delta$  9.89 (s, 1H), 8.80 (dd,  $J = 4.2, 1.7$  Hz, 1H), 8.76 (dd,  $J = 7.2, 1.8$  Hz, 1H), 8.15 (dd,  $J = 8.2, 1.7$  Hz, 1H), 7.54–7.48 (m, 2H), 7.45 (dd,  $J = 8.2, 4.2$  Hz, 1H), 7.11 (dd,  $J = 1.5, 0.8$  Hz, 2H), 6.81 (dt,  $J = 1.6, 0.8$  Hz, 1H), 3.76–3.70 (m, 1H), 2.82 (dd,  $J = 14.9, 6.7$  Hz, 1H), 2.74 (dd,  $J = 14.9, 7.0$  Hz, 1H), 2.23 (d,  $J = 0.8$  Hz, 6H), 1.79–1.72 (m, 1H), 1.70–1.62 (m, 2H), 1.61–1.52 (m, 1H), 0.95 (t,  $J = 7.2$  Hz, 3H).  $^{13}\text{C NMR}$  (151 MHz,  $\text{CDCl}_3$ )  $\delta$  169.67, 148.26, 138.59, 138.48, 136.45, 134.53, 133.77, 130.40, 129.15, 128.05, 127.50, 121.71, 121.65, 116.66, 45.33, 44.31, 36.96, 21.27, 20.36, 14.01. **HRMS** (ESI-TOF) Calcd for  $\text{C}_{23}\text{H}_{27}\text{N}_2\text{OS}^+$   $[\text{M}+\text{H}]$  379.1844, found 379.1836.

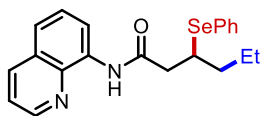

**3-(phenylselanyl)-N-(quinolin-8-yl)hexanamide (2p):** The reaction was carried out following General Procedure B using **1** (21.2 mg, 0.1 mmol), diphenyldiselenide (56.3 mg, 1.8 mmol), diethylzinc (0.15 mmol, 1.0 M in toluene), Ni(COD)(DMFU) (3.1 mg, 0.01 mmol), and THF (1.0 mL). The reaction was run for 20 h at 60 °C, and the product was purified by preparative thin-layer chromatography (PTLC) to afford 20.2 mg (51%) of **2p** as a colorless oil.  $^1\text{H NMR}$  (600 MHz,  $\text{CDCl}_3$ )  $\delta$  9.83 (s, 1H), 8.81 (dd,  $J = 4.2, 1.7$  Hz, 1H), 8.76–8.66 (m, 1H), 8.16 (dd,  $J = 8.2, 1.7$  Hz, 1H), 7.81–7.58 (m, 2H), 7.55–7.48 (m, 2H), 7.45 (dd,  $J = 8.2, 4.2$  Hz, 1H), 7.30–7.20 (m, 3H), 3.94–3.66 (m, 1H), 2.88 (d,  $J = 7.1$  Hz, 2H), 1.87–1.69 (m, 2H), 1.69–1.61 (m, 1H), 1.59–1.49 (m, 1H), 0.93 (t,  $J = 7.3$  Hz, 3H).  $^{13}\text{C NMR}$  (151 MHz,  $\text{CDCl}_3$ )  $\delta$  169.79, 148.26, 138.49, 136.49, 135.60, 134.47, 129.15, 128.50, 128.06, 127.85, 127.54, 121.75, 121.68, 116.71, 45.07, 41.15, 37.76, 21.27, 13.90. **HRMS** (ESI-TOF) Calcd for  $\text{C}_{21}\text{H}_{23}\text{N}_2\text{OSe}^+$   $[\text{M}+\text{H}]$  393.1035, found 393.1021.

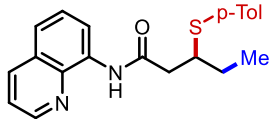

***N*-(quinolin-8-yl)-3-(*p*-tolylthio)pentanamide (2q):** The reaction was carried out following General Procedure B using **1** (21.2 mg, 0.1 mmol), **S10** (46.3 mg, 1.8 mmol), dimethylzinc (0.15 mmol, 1.0 M in THF), Ni(COD)(DMFU) (3.1 mg, 0.01 mmol), and THF (1.0 mL). The reaction was run for 20 h at 60 °C, and the product was purified by preparative thin-layer chromatography (PTLC) to afford 28.4 mg (81%) of **2q** as a colorless oil. <sup>1</sup>H NMR (600 MHz, CDCl<sub>3</sub>) δ 9.89 (s, 1H), 8.81 (dd, *J* = 4.2, 1.7 Hz, 1H), 8.75 (dd, *J* = 7.3, 1.7 Hz, 1H), 8.15 (dd, *J* = 8.2, 1.7 Hz, 1H), 7.54–7.48 (m, 2H), 7.45 (dd, *J* = 8.2, 4.2 Hz, 1H), 7.43–7.39 (m, 2H), 7.10–7.06 (m, 2H), 3.62 (qd, *J* = 7.1, 5.3 Hz, 1H), 2.79 (dd, *J* = 14.9, 6.9 Hz, 1H), 2.74 (dd, *J* = 15.0, 6.9 Hz, 1H), 2.29 (s, 3H), 1.79 (dq, *J* = 14.7, 7.4, 5.3 Hz, 1H), 1.73–1.65 (m, 1H), 1.12 (t, *J* = 7.3 Hz, 3H). <sup>13</sup>C NMR (151 MHz, CDCl<sub>3</sub>) δ 169.63, 148.26, 138.48, 137.60, 136.46, 134.51, 133.59, 130.39, 129.84, 128.05, 127.51, 121.73, 121.67, 116.69, 47.62, 43.68, 27.71, 21.20, 11.62. HRMS (ESI-TOF) Calcd for C<sub>21</sub>H<sub>23</sub>N<sub>2</sub>OS<sup>+</sup> [M+H] 351.1531, found 351.1529.

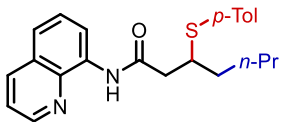

***N*-(quinolin-8-yl)-3-(*p*-tolylthio)heptanamide (2r):** The reaction was carried out following General Procedure C using **1** (21.2 mg, 0.1 mmol), **S10** (46.3 mg, 1.8 mmol), *n*-propylzinc bromide (0.15 mmol, 0.5 M in THF), Ni(COD)<sub>2</sub> (2.8 mg, 0.01 mmol), and THF (1.0 mL). The reaction was run for 20 h at 60 °C, and the product was purified by preparative thin-layer chromatography (PTLC) to afford 18.1 mg (48%) of **2r** as a colorless oil. <sup>1</sup>H NMR (600 MHz, CDCl<sub>3</sub>) δ 9.88 (s, 1H), 8.81 (dd, *J* = 4.2, 1.7 Hz, 1H), 8.75 (dd, *J* = 7.2, 1.7 Hz, 1H), 8.16 (dd, *J* = 8.2, 1.7 Hz, 1H), 7.56–7.48 (m, 2H), 7.46 (dd, *J* = 8.2, 4.2 Hz, 1H), 7.41 (d, *J* = 8.1 Hz, 2H), 7.08 (d, *J* = 7.7 Hz, 1H), 3.66 (dtd, *J* = 8.0, 6.8, 5.3 Hz, 1H), 2.99–2.58 (m, 2H), 2.29 (s, 3H), 1.88–1.70 (m, 1H), 1.70–1.50 (m, 3H), 1.41–1.29 (m, 2H), 0.90 (t, *J* = 7.3 Hz, 3H). <sup>13</sup>C NMR (150 MHz, CDCl<sub>3</sub>) δ 169.65, 148.27, 138.51, 137.61, 136.47, 134.55, 133.60, 130.41, 129.86, 128.07, 127.54, 121.74, 121.66, 116.71, 46.01, 44.15, 34.48, 29.28, 22.64, 21.22, 14.15. HRMS (ESI-TOF) Calcd for C<sub>23</sub>H<sub>27</sub>N<sub>2</sub>OS<sup>+</sup> [M+H] 379.1844, found 379.1832.

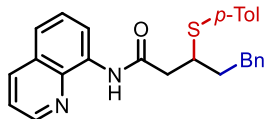

**5-phenyl-*N*-(quinolin-8-yl)-3-(*p*-tolylthio)pentanamide (2s):** The reaction was carried out following General Procedure C using **1** (21.2 mg, 0.1 mmol), **S10** (46.3 mg, 1.8 mmol), benzylzinc bromide (0.15 mmol, 0.5 M in THF), Ni(COD)<sub>2</sub> (2.8 mg, 0.01 mmol), and THF (1.0 mL). The reaction was run for 20 h at 60 °C, and the product was purified by preparative thin-layer chromatography (PTLC) to afford 29.0 mg (68%) of **2s** as a colorless oil. <sup>1</sup>H NMR (600 MHz, CDCl<sub>3</sub>) δ 9.88 (s, 1H), 8.80 (dd, *J* = 4.2, 1.7 Hz, 1H), 8.75 (dd, *J* = 7.3, 1.8 Hz, 1H), 8.15 (dd, *J* = 8.2, 1.7 Hz, 1H), 7.54–7.48 (m, 2H), 7.45 (dd, *J* = 8.2, 4.2 Hz, 1H), 7.41 (d, *J* = 8.1 Hz, 2H), 7.29–7.22 (m, 2H), 7.22–7.17 (m, 2H), 7.17–7.12 (m, 1H), 7.11–7.04 (m, 2H), 3.77–3.61 (m, 1H), 3.07–2.93 (m, 1H), 2.92–2.81 (m, 2H), 2.76 (dd, *J* = 14.9, 6.8 Hz, 1H), 2.29 (s, 3H), 2.12–2.02 (m, 1H), 2.00–1.91 (m, 1H). <sup>13</sup>C NMR (150 MHz, CDCl<sub>3</sub>) δ 169.36, 148.26, 141.65, 138.49, 137.82, 136.47, 134.48, 133.77, 129.99, 129.92, 128.62, 128.52, 128.06, 127.52, 126.04, 121.74, 121.71, 116.74, 45.64, 44.12, 36.43, 33.36, 21.23. HRMS (ESI-TOF) Calcd for C<sub>27</sub>H<sub>27</sub>N<sub>2</sub>OS<sup>+</sup> [M+H] 427.1844, found 427.1842.

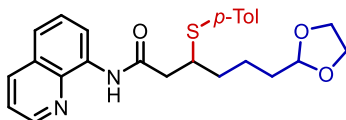

**6-(1,3-dioxolan-2-yl)-*N*-(quinolin-8-yl)-3-(*p*-tolylthio)hexanamide (2t):** The reaction was carried out following General Procedure C using **1** (21.2 mg, 0.1 mmol), **S10** (46.3 mg, 1.8 mmol), (2-(1,3-dioxolan-2-yl)ethyl)zinc bromide (0.15 mmol, 0.5 M in THF), Ni(COD)<sub>2</sub> (2.8 mg, 0.01 mmol), and THF (1.0 mL). The reaction was run for 20 h at 60 °C, and the product was purified by preparative thin-layer chromatography (PTLC) to afford 10.9 mg (25%) of **2t** as a colorless oil. <sup>1</sup>H NMR (600 MHz, CDCl<sub>3</sub>) δ 9.87 (s, 1H), 8.81 (dd, *J* = 4.2, 1.7 Hz, 1H), 8.74 (dd, *J* = 7.2, 1.8 Hz, 1H), 8.16 (dd, *J* = 8.2, 1.7 Hz, 1H), 7.59–7.49 (m, 2H), 7.46 (dd, *J* = 8.2, 4.2 Hz, 1H), 7.41 (d, *J* = 8.0 Hz, 2H), 7.07 (d, *J* = 7.8 Hz, 2H), 5.02–4.74 (m, 1H), 4.10–3.90 (m, 2H), 3.87–3.74 (m, 2H), 3.68–3.61 (m, 1H), 2.91–2.57 (m, 2H), 2.29 (s, 3H), 1.89–1.75 (m, 2H), 1.76–1.65 (m, 4H). <sup>13</sup>C NMR (150 MHz, CDCl<sub>3</sub>) δ 169.49, 148.27, 138.50, 137.71, 136.46, 134.53, 133.75, 130.22, 129.87, 128.06, 127.53, 121.74, 121.67, 116.72, 104.50, 65.00, 64.99, 46.03, 44.03, 34.57, 33.66, 21.60, 21.23. HRMS (ESI-TOF) Calcd for C<sub>25</sub>H<sub>29</sub>N<sub>2</sub>O<sub>3</sub>S<sup>+</sup> [M+H] 437.1899, found 437.1883.

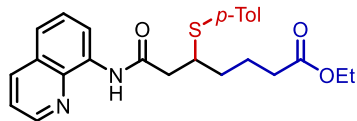

**ethyl 7-oxo-7-(quinolin-8-ylamino)-5-(*p*-tolylthio)heptanoate (2u):**

The reaction was carried out following General Procedure C using **1** (21.2 mg, 0.1 mmol), **S10** (46.3 mg, 1.8 mmol), (3-ethoxy-3-oxopropyl)zinc bromide (0.15 mmol, 0.5 M in THF), Ni(COD)<sub>2</sub> (2.8 mg, 0.01 mmol), and THF (1.0 mL). The reaction was run for 20 h at 60 °C, and the product was purified by preparative thin-layer chromatography (PTLC) to afford 8.3 mg (19%) of **2u** as a colorless oil. <sup>1</sup>H NMR (600 MHz, CDCl<sub>3</sub>) δ 9.87 (s, 1H), 8.81 (dd, *J* = 4.2, 1.7 Hz, 1H), 8.74 (dd, *J* = 7.1, 1.9 Hz, 1H), 8.16 (dd, *J* = 8.3, 1.7 Hz, 1H), 7.58–7.49 (m, 2H), 7.46 (dd, *J* = 8.2, 4.2 Hz, 1H), 7.41 (d, *J* = 8.1 Hz, 2H), 7.08 (d, *J* = 7.7 Hz, 2H), 4.10 (q, *J* = 7.1 Hz, 2H), 3.74–3.52 (m, 1H), 3.01–2.65 (m, 2H), 2.43–2.31 (m, 2H), 2.29 (s, 3H), 2.04–1.94 (m, 1H), 1.92–1.83 (m, 1H), 1.81–1.73 (m, 1H), 1.72–1.64 (m, 1H), 1.23 (t, *J* = 7.1 Hz, 3H). <sup>13</sup>C NMR (150 MHz, CDCl<sub>3</sub>) δ 173.46, 169.38, 148.29, 138.49, 137.83, 136.48, 134.48, 133.80, 130.04, 129.91, 128.07, 127.52, 121.76, 121.73, 116.73, 60.44, 45.74, 43.96, 34.15, 34.12, 22.59, 21.23, 14.36. HRMS (ESI-TOF) Calcd for C<sub>25</sub>H<sub>29</sub>N<sub>2</sub>O<sub>3</sub>S<sup>+</sup> [M+H] 437.1899, found 437.1897.

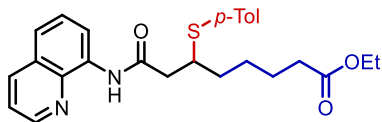

**ethyl 8-oxo-8-(quinolin-8-ylamino)-6-(*p*-tolylthio)octanoate (2v):**

The reaction was carried out following General Procedure C using **1** (21.2 mg, 0.1 mmol), **S10** (46.3 mg, 1.8 mmol), (4-ethoxy-4-oxobutyl)zinc bromide (0.15 mmol, 0.5 M in THF), Ni(COD)<sub>2</sub> (2.8 mg, 0.01 mmol), and THF (1.0 mL). The reaction was run for 20 h at 60 °C, and the product was purified by preparative thin-layer chromatography (PTLC) to afford 8.1 mg (18%) of **2v** as a colorless oil. <sup>1</sup>H NMR (600 MHz, CDCl<sub>3</sub>) δ 9.87 (s, 1H), 8.81 (dd, *J* = 4.2, 1.6 Hz, 1H), 8.74 (dd, *J* = 7.2, 1.8 Hz, 1H), 8.16 (dd, *J* = 8.3, 1.6 Hz, 1H), 7.81–7.48 (m, 2H), 7.46 (dd, *J* = 8.2, 4.2 Hz, 1H), 7.40 (d, *J* = 8.2 Hz, 2H), 7.08 (d, *J* = 7.8 Hz, 2H), 4.24–4.02 (m, 2H), 3.81–3.51 (m, 1H), 2.93–2.61 (m, 2H), 2.36–2.19 (m, 5H), 1.95–1.71 (m, 1H), 1.71–1.60 (m, 3H), 1.24 (t, *J* = 7.1 Hz, 2H). <sup>13</sup>C NMR (150 MHz, CDCl<sub>3</sub>) δ 173.74, 169.48, 148.29, 138.50, 137.78, 136.48, 134.50, 133.74, 130.13, 129.90, 128.07, 127.54, 121.76, 121.71, 116.73, 60.37, 45.87, 44.08, 34.37, 26.66, 24.89, 21.23, 14.39. HRMS (ESI-TOF) Calcd for C<sub>26</sub>H<sub>31</sub>N<sub>2</sub>O<sub>3</sub>S<sup>+</sup> [M+H] 451.2055, found 451.2055.

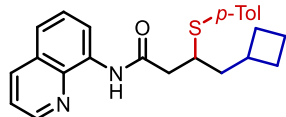

**4-cyclobutyl-N-(quinolin-8-yl)-3-(*p*-tolylthio)butanamide (2w):**

The reaction was carried out following General Procedure C using **1** (21.2 mg, 0.1 mmol), **S10** (46.3 mg, 1.8 mmol), cyclobutylzinc bromide (0.15 mmol, 0.5 M in THF), Ni(COD)<sub>2</sub> (2.8 mg, 0.01 mmol), and THF (1.0 mL). The reaction was run for 20 h at 60 °C, and the product was purified by preparative thin-layer chromatography (PTLC) to afford 19.5 mg (50%) of **2w** as a colorless oil. <sup>1</sup>H NMR (600 MHz, CDCl<sub>3</sub>) δ 9.87 (s, 1H), 8.81 (dd, *J* = 4.2, 1.7 Hz, 1H), 8.75 (dd, *J* = 7.3, 1.7 Hz, 1H), 8.16 (dd, *J* = 8.2, 1.7 Hz, 1H), 7.58–7.48 (m, 2H), 7.46 (dd, *J* = 8.2, 4.2 Hz, 1H), 7.40 (d, *J* = 8.1 Hz, 2H), 7.14–7.01 (m, 2H), 3.72–3.47 (m, 1H), 3.01–2.56 (m, 3H), 2.28 (s, 3H), 2.15–2.03 (m, 2H), 1.92–1.75 (m, 4H), 1.73–1.61 (m, 2H). <sup>13</sup>C NMR (150 MHz, CDCl<sub>3</sub>) δ 169.59, 148.26, 137.55, 136.46, 134.55, 133.47, 130.50, 129.84, 128.07, 127.54, 121.73, 121.65, 116.71, 44.34, 44.13, 42.06, 33.94, 28.80, 28.62, 21.22, 18.69. HRMS (ESI-TOF) Calcd for C<sub>24</sub>H<sub>27</sub>N<sub>2</sub>O<sub>3</sub>S<sup>+</sup> [M+H] 391.1844, found 391.1842.

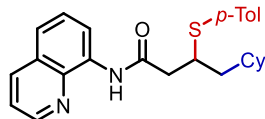

**4-cyclohexyl-N-(quinolin-8-yl)-3-(*p*-tolylthio)butanamide (2x):**

The reaction was carried out following General Procedure C using **1** (21.2 mg, 0.1 mmol), **S10** (46.3 mg, 1.8 mmol), cyclohexylzinc bromide (0.15 mmol, 0.5 M in THF), Ni(COD)<sub>2</sub> (2.8 mg, 0.01 mmol), and THF (1.0 mL). The reaction was run for 20 h at 60 °C, and the product was purified by preparative thin-layer chromatography (PTLC) to afford 7.5 mg (18%) of **2x** as a white solid. <sup>1</sup>H NMR (600 MHz, CDCl<sub>3</sub>) δ 9.87 (s, 1H), 8.81 (dd, *J* = 4.2, 1.7 Hz, 1H), 8.75 (dd, *J* = 7.2, 1.8 Hz, 1H), 8.16 (dd, *J* = 8.3, 1.7 Hz, 1H), 7.60–7.48 (m, 2H), 7.46 (dd, *J* = 8.2, 4.2 Hz, 1H), 7.41 (d, *J* = 8.1 Hz, 2H), 7.10–7.01 (m, 2H), 3.80–3.70 (m, 1H), 3.04–2.59 (m, 2H), 2.29 (s, 3H), 1.85 (d, *J* = 12.9 Hz, 1H), 1.83–1.61 (m, 4H), 1.59–1.51 (m, 2H), 1.30–1.20 (m, 3H), 1.19–1.04 (m, 1H), 1.01–0.69 (m, 2H). <sup>13</sup>C NMR (150 MHz, CDCl<sub>3</sub>) δ 169.66, 148.26, 138.52, 137.62, 136.47, 134.56, 133.67, 130.24, 129.85, 128.07, 127.55, 121.74, 121.64, 116.73, 44.64,

43.18, 42.58, 35.09, 33.80, 32.76, 26.71, 26.44, 26.28, 21.23. **HRMS** (ESI-TOF) Calcd for C<sub>26</sub>H<sub>31</sub>N<sub>2</sub>OS<sup>+</sup> [M+H] 419.2157, found 419.2147.

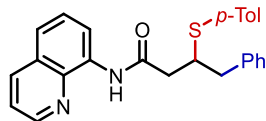

**4-phenyl-N-(quinolin-8-yl)-3-(p-tolylthio)butanamide (2y):** The reaction was carried out following General Procedure C using **1** (21.2 mg, 0.1 mmol), **S10** (46.3 mg, 1.8 mmol), phenylzinc bromide (0.15 mmol, 0.5 M in THF), Ni(COD)<sub>2</sub> (2.8 mg, 0.01 mmol), and THF (1.0 mL). The reaction was run for 20 h at 60 °C, and the product was purified by preparative thin-layer chromatography (PTLC) to afford 11.5 mg (28%) of **2y** as a colorless oil. **<sup>1</sup>H NMR** (600 MHz, CDCl<sub>3</sub>) δ 9.84 (s, 1H), 8.80 (dd, *J* = 4.2, 1.7 Hz, 1H), 8.74 (dd, *J* = 7.1, 1.8 Hz, 1H), 8.16 (dd, *J* = 8.2, 1.7 Hz, 1H), 7.71–7.49 (m, 2H), 7.46 (dd, *J* = 8.2, 4.2 Hz, 1H), 7.39 (d, *J* = 8.1 Hz, 2H), 7.30–7.24 (m, 3H), 7.23–7.17 (m, 1H), 7.07 (d, *J* = 7.8 Hz, 2H), 4.10–3.85 (m, 1H), 3.35–2.90 (m, 2H), 2.86–2.66 (m, 2H), 2.48–2.08 (m, 3H). **<sup>13</sup>C NMR** (150 MHz, CDCl<sub>3</sub>) δ 169.35, 148.25, 138.68, 138.49, 137.77, 136.48, 134.49, 133.63, 130.33, 129.90, 129.64, 128.53, 128.06, 127.54, 126.73, 121.74, 121.68, 116.75, 47.09, 42.61, 41.18, 21.24. **HRMS** (ESI-TOF) Calcd for C<sub>26</sub>H<sub>25</sub>N<sub>2</sub>OS<sup>+</sup> [M+H] 413.1688, found 413.1682.

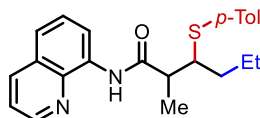

**2-methyl-N-(quinolin-8-yl)-3-(p-tolylthio)hexanamide (3a):** The reaction was carried out following General Procedure B using **1a** (22.6 mg, 0.1 mmol), **S1** (58.9 mg, 1.8 mmol), diethylzinc (0.15 mmol, 1.0 M in toluene), Ni(COD)(DMFU) (3.1 mg, 0.01 mmol), and THF (1.0 mL). The reaction was run for 20 h at 60 °C, and the product was purified by preparative thin-layer chromatography (PTLC) to afford 28.4 mg (75%, 1.3:1 d.r.) of **3a** as a colorless oil. **<sup>1</sup>H NMR** (600 MHz, CDCl<sub>3</sub>) (major) δ 9.94 (s, 1H), 8.85–8.79 (m, 1H), 8.76 (d, *J* = 7.3 Hz, 1H), 8.15 (dd, *J* = 8.2, 1.7 Hz, 1H), 7.57–7.48 (m, 2H), 7.45 (dd, *J* = 8.3, 4.2 Hz, 1H), 7.42 (d, *J* = 8.1 Hz, 1H), 7.39 (d, *J* = 8.1 Hz, 1H), 7.08 (d, *J* = 7.9 Hz, 2H), 3.64–3.54 (m, 1H), 2.87–2.74 (m, 1H), 2.31 (s, 3H), 1.87–1.66 (m, 2H), 1.60–1.49 (m, 2H), 1.41 (d, *J* = 7.0 Hz, 3H), 0.92 (t, *J* = 7.1 Hz, 3H); (minor) δ 10.1 (s, 1H), 8.85–8.79 (m, 1H), 8.76 (d, *J* = 7.3 Hz, 1H), 8.15 (dd, *J* = 8.2, 1.7 Hz, 1H), 7.57–7.48 (m, 2H), 7.45 (dd, *J* = 8.3, 4.2 Hz, 1H), 7.42 (d, *J* = 8.1 Hz, 1H), 7.39 (d, *J* = 8.1 Hz, 1H), 7.05 (d, *J* = 7.9 Hz, 2H), 3.41–3.37 (m, 1H), 2.87–2.74 (m, 1H), 2.28 (s, 3H), 1.87–1.66 (m, 2H), 1.60–1.49 (m, 2H), 1.45 (d, *J* = 7.0 Hz, 3H), 0.91 (t, *J* = 7.0 Hz, 4H). **<sup>13</sup>C NMR** (151 MHz, CDCl<sub>3</sub>) (major) δ 173.26, 148.26, 138.65, 137.09, 136.44, 134.55, 132.63, 131.89, 129.88, 128.05, 127.54, 121.70, 121.55, 116.64, 52.44, 46.48, 33.01, 21.23, 20.45, 14.09, 13.63; (minor) δ 173.00, 148.25, 138.70, 137.27, 136.39, 134.65, 133.00, 131.54, 129.83, 128.07, 127.52, 121.69, 121.56, 116.67, 53.92, 46.82, 34.62, 21.20, 20.93, 15.74, 13.95. **HRMS** (ESI-TOF) Calcd for C<sub>23</sub>H<sub>27</sub>N<sub>2</sub>OS<sup>+</sup> [M+H] 379.1844, found 379.1830.

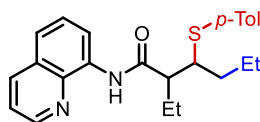

**2-ethyl-N-(quinolin-8-yl)-3-(p-tolylthio)hexanamide (3b):** The reaction was carried out following General Procedure B using **1b** (24.0 mg, 0.1 mmol), **S1** (58.9 mg, 1.8 mmol), diethylzinc (0.15 mmol, 1.0 M in toluene), Ni(COD)(DMFU) (3.1 mg, 0.01 mmol), and THF (1.0 mL). The reaction was run for 20 h at 60 °C, and the product was purified by preparative thin-layer chromatography (PTLC) to afford 24.3 mg (62%, 3.1:1 d.r.) of **3b** as a colorless oil. **<sup>1</sup>H NMR** (600 MHz, CDCl<sub>3</sub>) (major) δ 9.90 (s, 1H), 8.85–8.77 (m, 2H), 8.16 (d, *J* = 8.2 Hz, 1H), 7.60–7.32 (m, 5H), 7.13 (dt, *J* = 7.9, 0.7 Hz, 2H), 3.34–3.30 (m, 1H), 2.54 (ddd, *J* = 9.2, 6.7, 5.1 Hz, 1H), 2.34 (s, 3H), 2.00–1.75 (m, 3H), 1.57–1.50 (m, 3H), 0.99 (t, *J* = 7.4 Hz, 3H), 0.91 (t, *J* = 7.1 Hz, 3H); (minor) δ 10.02 (s, 1H), 8.85–8.77 (m, 2H), 8.16 (d, *J* = 8.2 Hz, 1H), 7.60–7.32 (m, 5H), 7.15–7.00 (m, 2H), 3.45 (ddd, *J* = 8.7, 6.7, 3.9 Hz, 1H), 2.59 (ddd, *J* = 10.0, 6.7, 4.3 Hz, 1H), 2.32 (s, 3H), 2.00–1.75 (m, 3H), 1.57–1.50 (m, 3H), 0.95 (t, *J* = 7.4 Hz, 3H), 0.89 (t, *J* = 7.1 Hz, 3H). **<sup>13</sup>C NMR** (151 MHz, CDCl<sub>3</sub>) (major) δ 172.53, 148.25, 138.64, 137.13, 136.42, 134.54, 132.89, 132.08, 129.84, 128.06, 127.57, 121.69, 121.52, 116.70, 54.79, 52.56, 33.79, 22.46, 21.26, 20.25, 14.08, 12.55; (minor) δ 172.42, 148.27, 138.66, 137.33, 136.41, 134.58, 132.96, 131.64, 129.93, 128.11, 127.56, 121.71, 121.61, 116.67, 54.87, 52.84, 34.10, 24.34, 21.26, 20.87, 13.97, 12.31. **HRMS** (ESI-TOF) Calcd for C<sub>24</sub>H<sub>29</sub>N<sub>2</sub>OS<sup>+</sup> [M+H] 393.2001, found 393.2011.



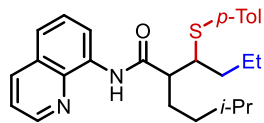

**2-isopentyl-*N*-(quinolin-8-yl)-3-(*p*-tolylthio)hexanamide (3c):** The reaction was carried out following General Procedure B using **1c** (28.2 mg, 0.1 mmol), **S1** (58.9 mg, 1.8 mmol), diethylzinc (0.15 mmol, 1.0 M in toluene), Ni(COD)(DMFU) (3.1 mg, 0.01 mmol), and THF (1.0 mL). The reaction was run for 20 h at 60 °C, and the product was purified by preparative thin-layer chromatography (PTLC) to afford 22.6 mg (52%, 1.8:1 d.r.) of **3c** as a colorless oil. **<sup>1</sup>H NMR** (600 MHz, CDCl<sub>3</sub>) (major) δ 9.89 (s, 1H), 8.84–8.76 (m, 2H), 8.16 (d, *J* = 8.2 Hz, 1H), 7.56–7.48 (m, 2H), 7.48–7.44 (m, 1H), 7.39 (d, *J* = 8.1 Hz, 2H), 7.09 (d, *J* = 7.8 Hz, 2H), 3.49–3.43 (m, 1H), 2.64–2.60 (m, 1H), 2.33 (s, 3H), 1.96–1.64 (m, 4H), 1.58–1.49 (m, 3H), 1.33–1.15 (m, 2H), 0.96–0.82 (m, 9H); (minor) δ 10.02 (s, 1H), 8.84–8.76 (m, 2H), 8.16 (d, *J* = 8.2 Hz, 1H), 7.56–7.48 (m, 2H), 7.48–7.44 (m, 1H), 7.39 (d, *J* = 8.1 Hz, 2H), 7.12 (d, *J* = 7.8 Hz, 2H), 3.33–3.29 (m, 1H), 2.60–2.55 (m, 1H), 2.34 (s, 3H), 1.96–1.64 (m, 4H), 1.58–1.49 (m, 3H), 1.33–1.15 (m, 2H), 0.96–0.82 (m, 9H). **<sup>13</sup>C NMR** (151 MHz, CDCl<sub>3</sub>) (major) δ 172.61, 148.24, 138.65, 137.10, 136.41, 134.57, 132.79, 132.17, 129.86, 128.07, 127.58, 121.70, 121.51, 116.69, 53.31, 52.86, 37.15, 33.75, 28.36, 26.87, 22.85, 22.46, 21.27, 20.41, 14.09; (minor) δ 172.49, 148.26, 138.69, 137.34, 136.40, 134.61, 133.04, 131.67, 129.92, 128.11, 127.57, 121.71, 121.57, 116.67, 53.27, 52.85, 36.82, 34.06, 28.96, 26.87, 22.74, 22.52, 20.93, 20.41, 13.98. **HRMS** (ESI-TOF) Calcd for C<sub>27</sub>H<sub>35</sub>N<sub>2</sub>OS<sup>+</sup> [M+H] 435.2470, found 435.2463.

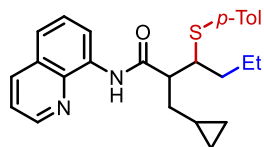

**2-(cyclopropylmethyl)-*N*-(quinolin-8-yl)-3-(*p*-tolylthio)hexanamide (3d):** The reaction was carried out following General Procedure B using **1d** (26.6 mg, 0.1 mmol), **S1** (58.9 mg, 1.8 mmol), diethylzinc (0.15 mmol, 1.0 M in toluene), Ni(COD)(DMFU) (3.1 mg, 0.01 mmol), and THF (1.0 mL). The reaction was run for 20 h at 60 °C, and the product was purified by preparative thin-layer chromatography (PTLC) to afford 21.7 mg (52%, 2.9:1 d.r.) of **3d** as a colorless oil. **<sup>1</sup>H NMR** (600 MHz, CDCl<sub>3</sub>) (major) δ 9.93 (s, 1H), 9.05–8.60 (m, 2H), 8.16 (dd, *J* = 8.2, 1.7 Hz, 1H), 7.55–7.49 (m, 2H), 7.46 (dd, *J* = 8.2, 4.2 Hz, 1H), 7.39 (d, *J* = 8.1 Hz, 2H), 7.14–7.05 (m, 2H), 3.64–3.36 (m, 1H), 2.96–2.66 (m, 1H), 2.33 (s, 3H), 1.99–1.90 (m, 1H), 1.87–1.77 (m, 1H), 1.68–1.61 (m, 1H), 1.56–1.44 (m, 3H), 1.01–0.84 (m, 3H), 0.80–0.71 (m, 1H), 0.51–0.32 (m, 2H), 0.20–0.10 (m, 1H), 0.08–0.01 (m, 1H); (minor) δ 10.09 (s, 1H), 9.05–8.60 (m, 2H), 8.16 (dd, *J* = 8.2, 1.7 Hz, 1H), 7.55–7.49 (m, 2H), 7.46 (dd, *J* = 8.2, 4.2 Hz, 1H), 7.39 (d, *J* = 8.1 Hz, 2H), 7.17–7.11 (m, 2H), 3.42–3.32 (m, 1H), 2.76–2.67 (m, 1H), 2.34 (s, 3H), 1.92–1.87 (m, 1H), 1.87–1.77 (m, 1H), 1.68–1.61 (m, 1H), 1.56–1.44 (m, 3H), 1.01–0.84 (m, 3H), 0.71–0.66 (m, 1H), 0.36–0.28 (m, 2H), 0.13–0.07 (m, 1H), 0.08–0.01 (m, 1H). **<sup>13</sup>C NMR** (151 MHz, CDCl<sub>3</sub>) (major) δ 172.77, 148.26, 138.66, 137.11, 136.42, 134.64, 132.82, 132.13, 129.86, 128.08, 127.60, 121.69, 121.49, 116.71, 53.38, 52.49, 34.20, 33.76, 21.28, 20.23, 14.09, 9.74, 5.37, 4.30; (minor) δ 172.70, 148.28, 138.68, 137.29, 136.40, 134.68, 132.87, 131.58, 129.91, 128.11, 127.57, 121.71, 121.57, 116.67, 53.55, 52.48, 36.14, 34.08, 21.26, 20.82, 13.98, 9.47, 4.98, 4.51. **HRMS** (ESI-TOF) Calcd for C<sub>26</sub>H<sub>31</sub>N<sub>2</sub>OS<sup>+</sup> [M+H] 419.2157, found 419.2153.

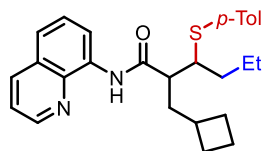

**2-(cyclobutylmethyl)-*N*-(quinolin-8-yl)-3-(*p*-tolylthio)hexanamide (3e):** The reaction was carried out following General Procedure B using **1e** (28.0 mg, 0.1 mmol), **S1** (58.9 mg, 1.8 mmol), diethylzinc (0.15 mmol, 1.0 M in toluene), Ni(COD)(DMFU) (3.1 mg, 0.01 mmol), and THF (1.0 mL). The reaction was run for 20 h at 60 °C, and the product was purified by preparative thin-layer chromatography (PTLC) to afford 22.5 mg (52%, 3.7 d.r.) of **3e** as a colorless oil. **<sup>1</sup>H NMR** (600 MHz, CDCl<sub>3</sub>) (major) δ 9.83 (s, 1H), 8.98–8.68 (m, 2H), 8.16 (dd, *J* = 8.2, 1.8 Hz, 1H), 7.56–7.48 (m, 2H), 7.48–7.43 (m, 1H), 7.38 (d, *J* = 8.1 Hz, 2H), 7.08 (d, *J* = 7.8 Hz, 2H), 3.43 (ddd, *J* = 8.5, 6.5, 3.8 Hz, 1H), 2.60–2.55 (m, 1H), 2.32 (s, 3H), 2.40–2.27 (m, 1H), 2.11–1.94 (m, 3H), 1.86–1.71 (m, 4H), 1.69–1.59 (m, 2H), 1.57–1.49 (m, 2H), 0.91 (t, *J* = 7.1 Hz, 3H); (minor) δ 10.00 (s, 1H), 8.98–8.68 (m, 2H), 8.16 (dd, *J* = 8.2, 1.8 Hz, 1H), 7.56–7.48 (m, 2H), 7.48–7.43 (m, 1H), 7.38 (d, *J* = 8.1 Hz, 2H), 7.13 (d, *J* = 7.8 Hz, 0H), 3.30–3.26 (m, 1H), 2.57–2.51 (m, 1H), 2.34 (s, 3H), 2.40–2.27 (m, 1H), 2.11–1.94 (m, 3H), 1.86–1.71 (m, 4H), 1.69–1.59 (m, 2H), 1.57–1.49 (m, 2H), 0.88 (t, *J* = 6.3 Hz, 3H). **<sup>13</sup>C NMR** (151 MHz, CDCl<sub>3</sub>) (major) δ 172.59, 148.28, 138.64, 137.08, 136.41, 134.56, 132.82, 132.15, 129.83, 128.07, 127.58, 121.70, 121.51, 116.68, 52.79, 51.03, 36.32, 34.62, 33.70, 28.78, 28.22, 21.27, 20.18,

18.49, 14.12; (minor)  $\delta$  172.53, 148.31, 138.67, 137.34, 136.41, 134.62, 133.00, 131.62, 129.91, 128.12, 127.58, 121.72, 121.60, 116.67, 53.07, 51.14, 38.38, 34.48, 34.12, 28.63, 28.31, 20.88, 20.18, 18.54, 13.98. **HRMS** (ESI-TOF) Calcd for  $C_{27}H_{33}N_2OS^+$  [M+H] 433.2314, found 433.2307.

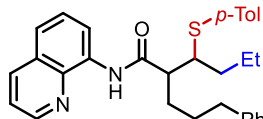

**2-(3-phenylpropyl)-N-(quinolin-8-yl)-3-(p-tolylthio)hexanamide (3f):** The reaction was carried out following General Procedure B using **1f** (33.0 mg, 0.1 mmol), **S1** (58.9 mg, 1.8 mmol), diethylzinc (0.15 mmol, 1.0 M in toluene), Ni(COD)(DMFU) (3.1 mg, 0.01 mmol), and THF (1.0 mL). The reaction was run for 20 h at 60 °C, and the product was purified by preparative thin-layer chromatography (PTLC) to afford 24.6 mg (51%, 1.7:1 d.r.) of **3f** as a colorless oil. **<sup>1</sup>H NMR** (600 MHz,  $CDCl_3$ ) (major)  $\delta$  9.93 (s, 1H), 8.92–8.70 (m, 2H), 8.23–8.14 (m, 1H), 7.60–7.51 (m, 2H), 7.49 (dd,  $J = 8.2, 4.2$  Hz, 1H), 7.40 (d,  $J = 8.1$  Hz, 2H), 7.26–7.20 (m, 2H), 7.18–7.14 (m, 3H), 7.13–7.10 (m, 2H), 3.50–3.44 (m, 1H), 2.72–2.56 (m, 3H), 2.36 (s, 3H), 2.05–1.63 (m, 6H), 1.58–1.51 (m, 2H), 0.93 (t,  $J = 7.2$  Hz, 3H); (minor) 10.06 (s, 1H), 8.92–8.70 (m, 2H), 8.23–8.14 (m, 1H), 7.60–7.51 (m, 2H), 7.49 (dd,  $J = 8.2, 4.2$  Hz, 1H), 7.46 (d,  $J = 8.1$  Hz, 2H), 7.26–7.20 (m, 2H), 7.18–7.14 (m, 3H), 7.13–7.10 (m, 2H), 3.34–3.27 (m, 1H), 2.72–2.56 (m, 3H), 2.38 (s, 3H), 2.05–1.63 (m, 6H), 1.58–1.51 (m, 2H), 0.91 (t,  $J = 7.2$  Hz, 3H). **<sup>13</sup>C NMR** (151 MHz,  $CDCl_3$ ) (major)  $\delta$  172.42, 148.26, 142.23, 138.62, 137.16, 136.42, 134.50, 132.85, 132.07, 129.88, 128.52, 128.37, 128.06, 127.55, 125.84, 121.70, 121.58, 116.71, 52.97, 52.74, 36.12, 33.74, 29.89, 28.88, 21.27, 20.35, 14.06; (minor)  $\delta$  172.29, 148.28, 142.23, 138.65, 137.45, 136.41, 134.54, 133.19, 131.53, 129.97, 128.54, 128.36, 128.11, 127.55, 125.82, 121.72, 121.65, 116.69, 53.26, 52.96, 35.95, 33.98, 30.84, 29.54, 21.28, 20.94, 13.96. **HRMS** (ESI-TOF) Calcd for  $C_{31}H_{35}N_2OS^+$  [M+H] 483.2470, found 483.2465.

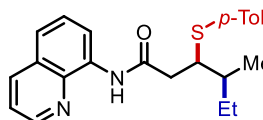

**4-methyl-N-(quinolin-8-yl)-3-(p-tolylthio)hexanamide (3g):** The reaction was carried out following General Procedure B using **1g** (22.6 mg, 0.1 mmol), **S10** (46.3 mg, 1.8 mmol), diethylzinc (0.15 mmol, 1.0 M in toluene), Ni(COD)(DMFU) (3.1 mg, 0.01 mmol), and THF (1.0 mL). The reaction was run for 20 h at 60 °C, and the product was purified by preparative thin-layer chromatography (PTLC) to afford 33.6 mg (89%) of **3g** as a white solid. **<sup>1</sup>H NMR** (600 MHz,  $CDCl_3$ )  $\delta$  9.92 (s, 1H), 8.80 (dd,  $J = 4.2, 1.7$  Hz, 1H), 8.73 (dd,  $J = 7.3, 1.7$  Hz, 1H), 8.15 (dd,  $J = 8.3, 1.7$  Hz, 1H), 7.53–7.47 (m, 2H), 7.44 (dd,  $J = 8.2, 4.2$  Hz, 1H), 7.40–7.36 (m, 2H), 7.02–6.98 (m, 2H), 3.79 (ddd,  $J = 8.8, 5.0, 3.8$  Hz, 1H), 2.84 (dd,  $J = 15.1, 4.9$  Hz, 1H), 2.67 (dd,  $J = 15.1, 8.8$  Hz, 1H), 2.21 (s, 3H), 1.81 (dddd,  $J = 13.4, 6.6, 4.8, 3.3$  Hz, 1H), 1.63–1.53 (m, 1H), 1.38–1.31 (m, 1H), 1.09 (d,  $J = 6.8$  Hz, 3H), 0.92 (t,  $J = 7.4$  Hz, 3H). **<sup>13</sup>C NMR** (151 MHz,  $CDCl_3$ )  $\delta$  169.99, 148.24, 138.49, 137.10, 136.42, 134.58, 132.72, 131.71, 129.75, 128.03, 127.49, 121.70, 121.59, 116.68, 51.83, 40.52, 38.82, 26.68, 21.12, 16.00, 12.15. **HRMS** (ESI-TOF) Calcd for  $C_{23}H_{27}N_2OS^+$  [M+H] 379.1844, found 379.1838. **X-ray** (single-crystal) Colorless crystals of X-ray diffraction quality were obtained by vapor diffusion of hexane to a saturated solution of **4g** in ethyl acetate (CCDC 2154909).<sup>7</sup>

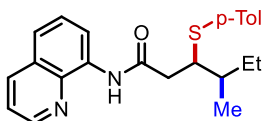

**4-methyl-N-(quinolin-8-yl)-3-(p-tolylthio)hexanamide (3h):** The reaction was carried out following General Procedure B using **1h** (24.0 mg, 0.1 mmol), **S10** (46.3 mg, 1.8 mmol), dimethylzinc (0.15 mmol, 1.0 M in THF), Ni(COD)(DMFU) (3.1 mg, 0.01 mmol), and THF (1.0 mL). The reaction was run for 20 h at 60 °C, and the product was purified by preparative thin-layer chromatography (PTLC) to afford 29.1 mg (77%) of **3h** as a colorless oil. **<sup>1</sup>H NMR** (600 MHz,  $CDCl_3$ )  $\delta$  9.87 (s, 1H), 8.80 (dd,  $J = 4.2, 1.7$  Hz, 1H), 8.72 (dd,  $J = 7.2, 1.7$  Hz, 1H), 8.14 (dd,  $J = 8.3, 1.7$  Hz, 1H), 7.53–7.47 (m, 2H), 7.44 (dd,  $J = 8.2, 4.2$  Hz, 1H), 7.41–7.36 (m, 2H), 7.01–6.99 (m, 2H), 3.82 (ddd,  $J = 7.8, 6.3, 3.4$  Hz, 1H), 2.85 (dd,  $J = 15.0, 6.4$  Hz, 1H), 2.79 (dd,  $J = 15.0, 7.8$  Hz, 1H), 2.22 (s, 3H), 1.87–1.78 (m, 1H), 1.73 (dq,  $J = 12.8, 7.4, 5.3$  Hz, 1H), 1.36 (ddq,  $J = 13.4, 8.4, 7.3$  Hz, 1H), 1.05 (d,  $J = 6.8$  Hz, 3H), 0.93 (t,  $J = 7.4$  Hz, 3H). **<sup>13</sup>C NMR** (151 MHz,  $CDCl_3$ )  $\delta$  169.91, 148.26, 138.46, 137.05, 136.43, 134.54, 132.72, 131.80, 129.78, 128.03, 127.48, 121.71, 121.61, 116.65, 52.17, 42.39, 39.00, 27.18, 21.12, 15.71, 12.15. **HRMS** (ESI-TOF) Calcd for  $C_{23}H_{27}N_2OS^+$  [M+H] 379.1844, found 379.1834.

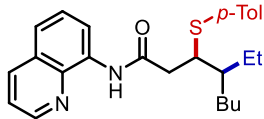

**4-ethyl-N-(quinolin-8-yl)-3-(p-tolylthio)octanamide (3i):** The reaction was carried out following General Procedure B using **1i** (26.8 mg, 0.1 mmol), **S10** (46.3 mg, 1.8 mmol), diethylzinc (0.15 mmol, 1.0 M in toluene), Ni(COD)(DMFU) (3.1 mg, 0.01 mmol), and THF (1.0 mL). The reaction was run for 20 h at 60 °C, and the product was purified by preparative thin-layer chromatography (PTLC) to afford 31.1 mg (74%) of **3i** as a colorless oil. <sup>1</sup>H NMR (600 MHz, CDCl<sub>3</sub>) δ 9.89 (s, 1H), 8.80 (dd, *J* = 4.2, 1.7 Hz, 1H), 8.72 (dd, *J* = 7.2, 1.8 Hz, 1H), 8.14 (dd, *J* = 8.3, 1.7 Hz, 1H), 7.52–7.47 (m, 2H), 7.44 (dd, *J* = 8.2, 4.2 Hz, 1H), 7.40–7.36 (m, 2H), 7.01–6.97 (m, 2H), 3.91 (ddd, *J* = 8.5, 5.7, 3.1 Hz, 1H), 2.85 (dd, *J* = 15.0, 5.7 Hz, 1H), 2.73 (dd, *J* = 15.0, 8.3 Hz, 1H), 2.21 (s, 3H), 1.74 (tt, *J* = 13.6, 7.3 Hz, 1H), 1.60 (pd, *J* = 6.5, 3.1 Hz, 1H), 1.50–1.22 (m, 7H), 0.95 (t, *J* = 7.4 Hz, 3H), 0.86 (t, *J* = 7.0 Hz, 3H). <sup>13</sup>C NMR (151 MHz, CDCl<sub>3</sub>) δ 169.98, 148.22, 138.47, 137.07, 136.41, 134.55, 132.72, 131.75, 129.75, 128.03, 127.48, 121.69, 121.58, 116.66, 49.86, 43.94, 41.48, 30.44, 30.09, 24.00, 23.07, 21.11, 14.18, 12.43. HRMS (ESI-TOF) Calcd for C<sub>21</sub>H<sub>21</sub>ClN<sub>2</sub>OS<sup>+</sup> [M+H] 421.2314, found 421.2305.

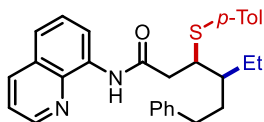

**4-ethyl-6-phenyl-N-(quinolin-8-yl)-3-(p-tolylthio)hexanamide (3j):** The reaction was carried out following General Procedure B using **1j** (31.6 mg, 0.1 mmol), **S10** (46.3 mg, 1.8 mmol), diethylzinc (0.15 mmol, 1.0 M in toluene), Ni(COD)(DMFU) (3.1 mg, 0.01 mmol), and THF (1.0 mL). The reaction was run for 20 h at 60 °C, and the product was purified by preparative thin-layer chromatography (PTLC) to afford 34.6 mg (74%) of **3j** as a colorless oil. <sup>1</sup>H NMR (600 MHz, CDCl<sub>3</sub>) δ 9.85 (s, 1H), 8.79 (dd, *J* = 4.2, 1.7 Hz, 1H), 8.71 (dd, *J* = 7.1, 1.8 Hz, 1H), 8.15 (dd, *J* = 8.2, 1.7 Hz, 1H), 7.54–7.47 (m, 2H), 7.44 (dd, *J* = 8.2, 4.2 Hz, 1H), 7.38–7.35 (m, 2H), 7.18 (tt, *J* = 7.6, 1.7 Hz, 2H), 7.14–7.11 (m, 2H), 7.09–7.05 (m, 1H), 7.01–6.98 (m, 2H), 3.96 (ddd, *J* = 8.1, 5.9, 3.3 Hz, 1H), 2.82 (dd, *J* = 15.0, 5.9 Hz, 1H), 2.73 (dd, *J* = 15.1, 8.1 Hz, 1H), 2.63 (t, *J* = 7.9 Hz, 2H), 2.22 (s, 3H), 1.84–1.71 (m, 3H), 1.71–1.65 (m, 1H), 1.49–1.41 (m, 1H), 0.96 (t, *J* = 7.4 Hz, 3H). <sup>13</sup>C NMR (151 MHz, CDCl<sub>3</sub>) δ 169.81, 148.23, 142.41, 138.45, 137.21, 136.42, 134.51, 132.90, 131.54, 129.81, 128.53, 128.39, 128.02, 127.47, 125.79, 121.71, 121.61, 116.67, 49.68, 43.31, 41.47, 34.01, 32.70, 23.86, 21.13, 12.29. HRMS (ESI-TOF) Calcd for C<sub>30</sub>H<sub>33</sub>N<sub>2</sub>OS<sup>+</sup> [M+H] 469.2314, found 469.2310.

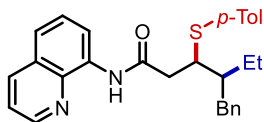

**4-benzyl-N-(quinolin-8-yl)-3-(p-tolylthio)hexanamide (3k):** The reaction was carried out following General Procedure B using **1k** (30.2 mg, 0.1 mmol), **S10** (46.3 mg, 1.8 mmol), diethylzinc (0.15 mmol, 1.0 M in toluene), Ni(COD)(DMFU) (3.1 mg, 0.01 mmol), and THF (1.0 mL). The reaction was run for 20 h at 60 °C, and the product was purified by preparative thin-layer chromatography (PTLC) to afford 23.2 mg (51%) of **3k** as a colorless oil. <sup>1</sup>H NMR (600 MHz, CDCl<sub>3</sub>) δ 9.85 (s, 1H), 8.79 (dd, *J* = 4.2, 1.7 Hz, 1H), 8.73 (dd, *J* = 7.0, 2.0 Hz, 1H), 8.15 (dd, *J* = 8.2, 1.7 Hz, 1H), 7.53–7.48 (m, 2H), 7.45 (dd, *J* = 8.2, 4.2 Hz, 1H), 7.24–7.20 (m, 4H), 7.18–7.14 (m, 3H), 6.98–6.90 (m, 2H), 3.90 (ddd, *J* = 8.6, 5.9, 2.8 Hz, 1H), 2.89 (dd, *J* = 15.0, 5.9 Hz, 1H), 2.81–2.72 (m, 2H), 2.69 (dd, *J* = 13.8, 7.5 Hz, 1H), 2.22 (s, 3H), 1.98 (pd, *J* = 6.9, 2.8 Hz, 1H), 1.77 (ddd, *J* = 13.7, 7.4, 6.3 Hz, 1H), 1.35 (dp, *J* = 14.3, 7.2 Hz, 1H), 0.94 (t, *J* = 7.4 Hz, 3H). <sup>13</sup>C NMR (151 MHz, CDCl<sub>3</sub>) δ 169.70, 148.22, 140.84, 138.48, 136.89, 136.41, 134.52, 132.16, 131.54, 129.75, 129.36, 128.47, 128.03, 127.49, 126.04, 121.71, 121.64, 116.72, 48.62, 46.16, 41.35, 37.12, 23.56, 21.11, 12.27. HRMS (ESI-TOF) Calcd for C<sub>29</sub>H<sub>31</sub>N<sub>2</sub>OS<sup>+</sup> [M+H] 455.2157, found 455.2151.

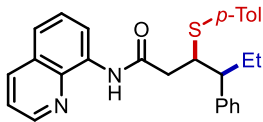

**4-phenyl-N-(quinolin-8-yl)-3-(p-tolylthio)hexanamide (3l):** The reaction was carried out following General Procedure B using **1l** (28.8 mg, 0.1 mmol), **S10** (46.3 mg, 1.8 mmol), diethylzinc (0.15 mmol, 1.0 M in toluene), Ni(COD)(DMFU) (3.1 mg, 0.01 mmol), and THF (1.0 mL). The reaction was run for 20 h at 60 °C, and the product was purified by preparative thin-layer chromatography (PTLC) to afford 15.4 mg (35%) of **3l** as a colorless oil. <sup>1</sup>H NMR (600 MHz, CDCl<sub>3</sub>) δ 9.78 (s, 1H), 8.78 (dd, *J* = 4.2, 1.7 Hz, 1H), 8.72 (dd, *J* = 7.2, 1.8 Hz, 1H), 8.15 (dd, *J* = 8.2, 1.7 Hz, 1H), 7.53–7.48 (m, 2H), 7.44 (dd, *J* = 8.2, 4.2 Hz, 1H), 7.40–7.37 (m, 2H), 7.34–7.29 (m, 4H), 7.28–7.24 (m, 1H), 7.05–7.00 (m, 2H), 4.03 (td, *J* = 7.0, 4.5 Hz, 1H), 2.98 (dt, *J* = 9.8, 4.9 Hz, 1H), 2.75 (dd, *J* = 15.2, 6.8

Hz, 1H), 2.66 (dd,  $J = 15.2, 7.3$  Hz, 1H), 2.25 (s, 3H), 2.11–2.01 (m, 1H), 2.03–1.93 (m, 1H), 0.83 (t,  $J = 7.3$  Hz, 3H).  $^{13}\text{C NMR}$  (151 MHz,  $\text{CDCl}_3$ )  $\delta$  169.77, 148.25, 141.11, 138.49, 137.19, 136.43, 134.52, 132.69, 131.91, 129.87, 129.31, 128.38, 128.05, 127.49, 126.95, 121.73, 121.66, 116.71, 52.32, 51.20, 42.47, 25.64, 21.17, 12.52. **HRMS** (ESI-TOF) Calcd for  $\text{C}_{28}\text{H}_{29}\text{ClN}_2\text{OS}^+$  [M+H] 441.2001, found 441.1989.

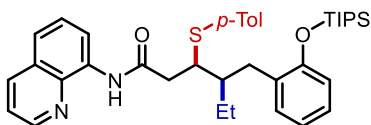

***N*-(quinolin-8-yl)-3-(*p*-tolylthio)-4-(2-(triisopropylsilyloxy)benzyl)hexanamide (3m):** The reaction was carried out following General Procedure B using **1m** (47.4 mg, 0.1 mmol), **S10** (46.3 mg, 1.8 mmol), diethylzinc (0.15 mmol, 1.0 M in toluene), Ni(COD)(DMFU) (3.1 mg, 0.01 mmol), and THF (1.0 mL).

The reaction was run for 20 h at 60 °C, and the product was purified by preparative thin-layer chromatography (PTLC) to afford 35.1 mg (56%) of **3m** as a colorless oil.  $^1\text{H NMR}$  (600 MHz,  $\text{CDCl}_3$ )  $\delta$  9.85 (s, 1H), 8.79 (dd,  $J = 4.2, 1.7$  Hz, 1H), 8.67 (dd,  $J = 6.7, 2.2$  Hz, 1H), 8.14 (dd,  $J = 8.3, 1.7$  Hz, 1H), 7.50–7.46 (m, 2H), 7.44 (dd,  $J = 8.2, 4.2$  Hz, 1H), 7.35–7.32 (m, 2H), 7.15 (dd,  $J = 7.5, 1.8$  Hz, 1H), 7.00 (td,  $J = 7.7, 1.8$  Hz, 1H), 6.96–6.93 (m, 2H), 6.80 (td,  $J = 7.4, 1.2$  Hz, 1H), 6.75 (dd,  $J = 8.1, 1.2$  Hz, 1H), 3.91 (ddd,  $J = 8.5, 5.5, 2.9$  Hz, 1H), 2.94–2.83 (m, 3H), 2.73 (dd,  $J = 14.8, 8.5$  Hz, 1H), 2.18 (s, 3H), 2.16–2.09 (m, 1H), 1.55 (dp,  $J = 14.4, 7.2$  Hz, 1H), 1.46 (ddd,  $J = 14.1, 7.5, 6.5$  Hz, 1H), 1.28 (dq,  $J = 14.9, 7.4$  Hz, 3H), 1.07 (dd,  $J = 7.5, 4.6$  Hz, 18H), 0.90 (t,  $J = 7.4$  Hz, 3H).  $^{13}\text{C NMR}$  (151 MHz,  $\text{CDCl}_3$ )  $\delta$  169.74, 154.45, 148.18, 138.48, 136.87, 136.35, 134.60, 132.32, 131.66, 131.01, 130.81, 129.71, 127.98, 127.45, 126.85, 121.63, 121.47, 120.70, 118.05, 116.65, 49.41, 44.52, 41.56, 31.52, 23.56, 21.09, 18.26, 18.23, 13.32, 12.50. **HRMS** (ESI-TOF) Calcd for  $\text{C}_{38}\text{H}_{51}\text{N}_2\text{O}_2\text{SSi}^+$  [M+H] 627.3441, found 627.3432.

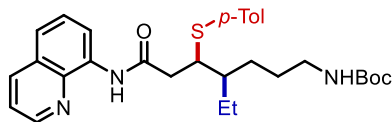

***tert*-butyl (4-ethyl-7-oxo-7-(quinolin-8-ylamino)-5-(*p*-tolylthio)heptyl)carbamate (3n):** The reaction was carried out following General Procedure B using **1n** (36.9 mg, 0.1 mmol), **S10** (46.3 mg, 1.8 mmol), diethylzinc (0.15 mmol, 1.0 M in toluene), Ni(COD)(DMFU) (3.1 mg, 0.01 mmol), and THF (1.0 mL). The

reaction was run for 20 h at 60 °C, and the product was purified by preparative thin-layer chromatography (PTLC) to afford 14.1 mg (27%) of **3n** as a colorless oil.  $^1\text{H NMR}$  (600 MHz,  $\text{CDCl}_3$ )  $\delta$  9.88 (s, 1H), 8.81 (dd,  $J = 4.2, 1.7$  Hz, 1H), 8.72 (dd,  $J = 7.0, 2.0$  Hz, 1H), 8.16 (dd,  $J = 8.3, 1.7$  Hz, 1H), 7.55–7.47 (m, 2H), 7.46 (dd,  $J = 8.2, 4.2$  Hz, 1H), 7.41–7.35 (m, 2H), 7.04–6.99 (m, 2H), 4.53 (s, 1H), 3.91 (ddd,  $J = 8.5, 5.6, 3.1$  Hz, 1H), 3.11 (s, 2H), 2.84 (dd,  $J = 15.1, 5.6$  Hz, 1H), 2.72 (dd,  $J = 15.2, 8.3$  Hz, 1H), 2.22 (s, 3H), 1.71 (ddd,  $J = 12.9, 10.3, 6.0$  Hz, 1H), 1.61–1.40 (m, 13H), 1.37–1.24 (m, 2H), 0.93 (t,  $J = 7.4$  Hz, 3H).  $^{13}\text{C NMR}$  (151 MHz,  $\text{CDCl}_3$ )  $\delta$  169.83, 156.13, 148.29, 138.48, 137.24, 136.45, 134.52, 132.71, 131.64, 129.86, 128.05, 127.50, 121.74, 121.67, 116.70, 79.15, 49.62, 43.77, 41.14, 40.83, 28.60, 28.25, 28.01, 23.79, 12.40. **HRMS** (ESI-TOF) Calcd for  $\text{C}_{30}\text{H}_{40}\text{N}_3\text{O}_3\text{S}^+$  [M+H] 522.2790, found 522.2791.

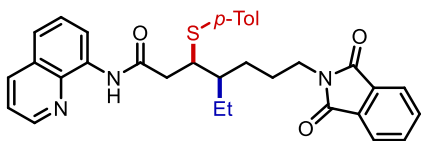

**7-(1,3-dioxoisindolin-2-yl)-4-ethyl-*N*-(quinolin-8-yl)-3-(*p*-tolylthio)heptanamide (3o):** The reaction was carried out following General Procedure B using **1o** (39.9 mg, 0.1 mmol), **S10** (46.3 mg, 1.8 mmol), diethylzinc (0.15 mmol, 1.0 M in toluene), Ni(COD)(DMFU) (3.1 mg, 0.01 mmol), and THF (1.0 mL). The

reaction was run for 20 h at 60 °C, and the product was purified by preparative thin-layer chromatography (PTLC) to afford 39.7 mg (72%) of **3o** as a colorless oil.  $^1\text{H NMR}$  (600 MHz,  $\text{CDCl}_3$ )  $\delta$  9.86 (s, 1H), 8.80 (dd,  $J = 4.2, 1.7$  Hz, 1H), 8.70 (dd,  $J = 6.9, 2.0$  Hz, 1H), 8.14 (dd,  $J = 8.3, 1.7$  Hz, 1H), 7.83 (dd,  $J = 5.4, 3.0$  Hz, 2H), 7.69 (dd,  $J = 5.4, 3.0$  Hz, 2H), 7.53–7.47 (m, 2H), 7.44 (dd,  $J = 8.2, 4.2$  Hz, 1H), 7.37–7.34 (m, 2H), 7.01–6.97 (m, 2H), 3.90 (ddd,  $J = 8.5, 5.5, 3.1$  Hz, 1H), 3.76–3.64 (m, 2H), 2.83 (dd,  $J = 15.2, 5.5$  Hz, 1H), 2.70 (dd,  $J = 15.1, 8.4$  Hz, 1H), 2.21 (s, 3H), 1.83–1.70 (m, 3H), 1.68–1.60 (m, 1H), 1.52–1.41 (m, 2H), 1.42–1.34 (m, 1H), 0.92 (t,  $J = 7.4$  Hz, 3H).  $^{13}\text{C NMR}$  (151 MHz,  $\text{CDCl}_3$ )  $\delta$  169.73, 168.51, 148.24, 138.44, 137.22, 136.39, 134.50, 133.94, 132.83, 132.29, 131.45, 129.81, 128.00, 127.46, 123.28, 121.68, 121.59, 116.68, 49.59, 43.71, 41.02, 38.36, 28.09, 27.05, 23.76, 21.12, 12.39. **HRMS** (ESI-TOF) Calcd for  $\text{C}_{33}\text{H}_{34}\text{N}_3\text{O}_3\text{S}^+$  [M+H] 552.2321, found 552.2325.

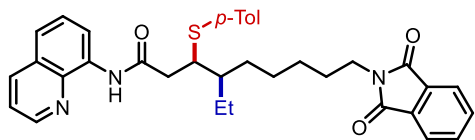

**9-(1,3-dioxisoindolin-2-yl)-4-ethyl-N-(quinolin-8-yl)-3-(p-tolylthio)nonanamide (3p):** The reaction was carried out following General Procedure B using **1p** (42.7 mg, 0.1 mmol), **S10** (46.3 mg, 1.8 mmol), diethylzinc (0.15 mmol, 1.0 M in toluene), Ni(COD)(DMFU) (3.1 mg, 0.01 mmol), and THF (1.0

mL). The reaction was run for 20 h at 60 °C, and the product was purified by preparative thin-layer chromatography (PTLC) to afford 35.9 mg (62%) of **3p** as a colorless oil. <sup>1</sup>H NMR (600 MHz, CDCl<sub>3</sub>) δ 9.88 (s, 1H), 8.79 (dd, *J* = 4.2, 1.7 Hz, 1H), 8.71 (dd, *J* = 7.3, 1.7 Hz, 1H), 8.14 (dd, *J* = 8.2, 1.7 Hz, 1H), 7.84 (dd, *J* = 5.4, 3.1 Hz, 2H), 7.69 (dd, *J* = 5.4, 3.0 Hz, 2H), 7.53–7.45 (m, 2H), 7.44 (dd, *J* = 8.2, 4.2 Hz, 1H), 7.40–7.35 (m, 2H), 7.02–6.94 (m, 2H), 3.91 (ddd, *J* = 8.5, 5.3, 3.1 Hz, 1H), 3.69–3.64 (m, 2H), 2.82 (dd, *J* = 15.1, 5.3 Hz, 1H), 2.69 (dd, *J* = 15.2, 8.6 Hz, 1H), 2.20 (s, 3H), 1.74–1.63 (m, 3H), 1.59 (pd, *J* = 6.4, 3.0 Hz, 1H), 1.49–1.42 (m, 2H), 1.42–1.24 (m, 5H), 0.92 (t, *J* = 7.4 Hz, 3H). <sup>13</sup>C NMR (151 MHz, CDCl<sub>3</sub>) δ 169.91, 168.55, 148.22, 138.44, 137.08, 136.38, 134.54, 133.93, 132.72, 132.31, 131.69, 129.74, 128.00, 127.47, 123.26, 121.67, 121.55, 116.65, 49.66, 43.99, 41.09, 38.16, 30.67, 28.66, 27.44, 27.31, 23.82, 21.09, 12.39. HRMS (ESI-TOF) Calcd for C<sub>35</sub>H<sub>38</sub>N<sub>3</sub>O<sub>3</sub>S<sup>+</sup> [M+H] 580.2634, found 580.2643.

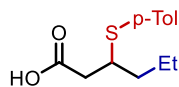

**3-(p-tolylthio)hexanoic acid (4):** The reaction was carried out following a modified literature procedure<sup>1</sup> using **2a** (36.4 mg, 0.1 mmol) and HCl (6 M, 1 mL). The reaction was run for 40 h at 70 °C, and the product was purified by preparative thin-layer chromatography (PTLC) to afford 20.0 mg (84%) of **4** as a colorless oil. <sup>1</sup>H NMR (600

MHz, CDCl<sub>3</sub>) δ 7.35 (d, *J* = 8.1 Hz, 2H), 7.11 (d, *J* = 7.5 Hz, 1H), 3.59–3.19 (m, 1H), 2.90–2.44 (m, 2H), 2.33 (s, 3H), 1.75–1.42 (m, 4H), 0.92 (t, *J* = 7.0 Hz, 2H). <sup>13</sup>C NMR (151 MHz, CDCl<sub>3</sub>) δ 177.81, 138.01, 134.07, 129.88, 129.67, 44.97, 40.36, 36.67, 21.27, 20.23, 13.90. HRMS (ESI-TOF) Calcd for C<sub>13</sub>H<sub>17</sub>O<sub>2</sub>S<sup>-</sup> [M-H] 237.0949, found 237.0941.



## X-Ray Crystallography

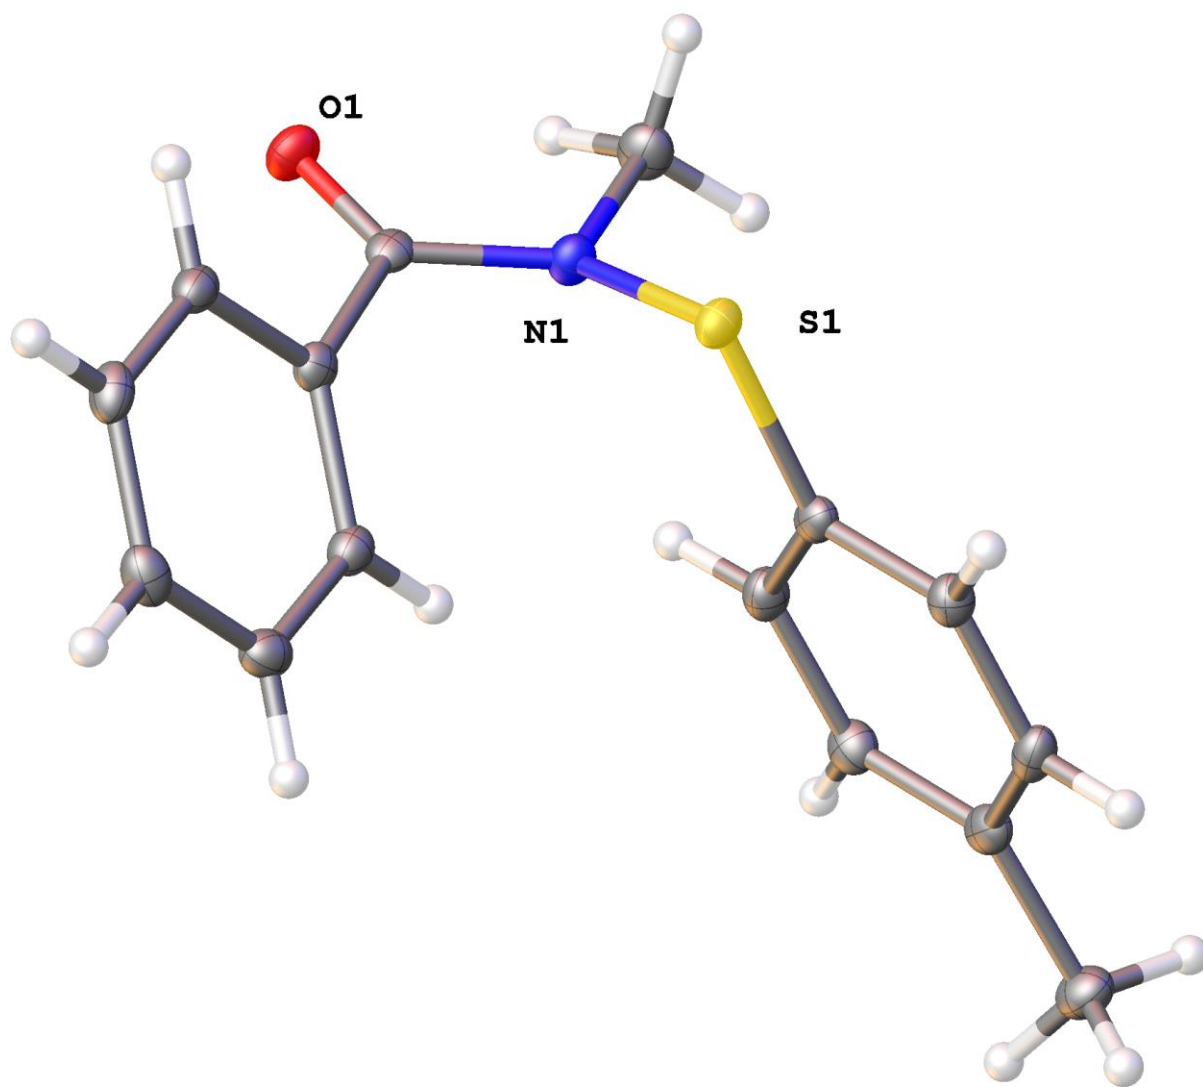

## Experimental Summary

The single crystal X-ray diffraction studies were carried out on a Bruker APEX II Ultra diffractometer equipped with Mo K radiation ( $\lambda = 0.71073$ ). Crystals of the subject compound were used as received (grown from Hexane). A  $0.200 \times 0.035 \times 0.035$  mm colorless crystal was mounted on a Cryoloop with Paratone oil.

Data were collected in a nitrogen gas stream at 100(2) K using  $\phi$  and  $\omega$  scans. Crystal-to-detector distance was 45 mm using exposure time 2.0 s (depending on the detector 2 $\theta$  position) with a scan width of 0.70°. Data collection was 99.7% complete to 25.242° in  $\theta$ . A total of 13350 reflections were collected. 2508 reflections were found to be symmetry independent, with a  $R_{\text{int}}$  of 0.0422. Indexing and unit cell refinement indicated a **Primitive, Monoclinic** lattice. The space group was found to be  $P2_1/n$ . The data were integrated using the Bruker SAINT Software program and scaled using the SADABS software program. Solution by direct methods (SHELXT) produced a complete phasing model consistent with the proposed structure. All nonhydrogen atoms were refined anisotropically by full-matrix least-squares (SHELXL-2014). All carbon bonded hydrogen atoms were placed using a riding model. Their positions were constrained relative to their parent atom using the appropriate HFIX command in SHELXL-2014. Crystallographic data are summarized in **Table S5**.

Notes: Excellent data and refinement.

**Table S5:** Crystal data and structure refinement for **S10** (CCDC 2149662).

|                                   |                                             |                  |
|-----------------------------------|---------------------------------------------|------------------|
| Report date                       | 2022-02-01                                  |                  |
| Identification code               | Engle389                                    |                  |
| Empirical formula                 | C <sub>15</sub> H <sub>15</sub> N O S       |                  |
| Molecular formula                 | C <sub>15</sub> H <sub>15</sub> N O S       |                  |
| Formula weight                    | 257.34                                      |                  |
| Temperature                       | 100.0 K                                     |                  |
| Wavelength                        | 0.71073 Å                                   |                  |
| Crystal system                    | Monoclinic                                  |                  |
| Space group                       | P 1 21/n 1                                  |                  |
| Unit cell dimensions              | a = 15.7788(18) Å                           | α = 90°.         |
|                                   | b = 5.6659(7) Å                             | β = 116.848(3)°. |
|                                   | c = 16.0675(19) Å                           | γ = 90°.         |
| Volume                            | 1281.6(3) Å <sup>3</sup>                    |                  |
| Z                                 | 4                                           |                  |
| Density (calculated)              | 1.334 Mg/m <sup>3</sup>                     |                  |
| Absorption coefficient            | 0.239 mm <sup>-1</sup>                      |                  |
| F(000)                            | 544                                         |                  |
| Crystal size                      | 0.2 x 0.035 x 0.035 mm <sup>3</sup>         |                  |
| Crystal color, habit              | colorless plank                             |                  |
| Theta range for data collection   | 1.501 to 26.029°.                           |                  |
| Index ranges                      | -19 ≤ h ≤ 14, -7 ≤ k ≤ 7, -19 ≤ l ≤ 19      |                  |
| Reflections collected             | 13350                                       |                  |
| Independent reflections           | 2508 [R(int) = 0.0422]                      |                  |
| Completeness to theta = 25.242°   | 99.7 %                                      |                  |
| Absorption correction             | Semi-empirical from equivalents             |                  |
| Max. and min. transmission        | 0.6465 and 0.6136                           |                  |
| Refinement method                 | Full-matrix least-squares on F <sup>2</sup> |                  |
| Data / restraints / parameters    | 2508 / 0 / 165                              |                  |
| Goodness-of-fit on F <sup>2</sup> | 1.087                                       |                  |
| Final R indices [I > 2σ(I)]       | R1 = 0.0403, wR2 = 0.0912                   |                  |
| R indices (all data)              | R1 = 0.0456, wR2 = 0.0935                   |                  |
| Largest diff. peak and hole       | 0.314 and -0.276 e.Å <sup>-3</sup>          |                  |



**Table S6:** Atomic coordinates ( $\times 10^4$ ) and equivalent isotropic displacement parameters ( $\text{\AA}^2 \times 10^3$ ) for **S10**.  
 $U(\text{eq})$  is defined as one third of the trace of the orthogonalized  $U^{ij}$  tensor.

|       | x       | y        | z       | U(eq) |
|-------|---------|----------|---------|-------|
| S(1)  | 6197(1) | 5994(1)  | 8282(1) | 14(1) |
| O(1)  | 4514(1) | 7166(3)  | 9317(1) | 18(1) |
| N(1)  | 5587(1) | 7492(3)  | 8749(1) | 15(1) |
| C(1)  | 6124(2) | 9283(4)  | 9456(1) | 19(1) |
| C(2)  | 4773(1) | 6564(3)  | 8742(1) | 13(1) |
| C(3)  | 4212(1) | 4804(4)  | 7997(1) | 13(1) |
| C(4)  | 3937(1) | 5214(4)  | 7053(1) | 15(1) |
| C(5)  | 3348(1) | 3619(4)  | 6391(1) | 17(1) |
| C(6)  | 3037(1) | 1598(4)  | 6658(1) | 18(1) |
| C(7)  | 3316(1) | 1173(4)  | 7599(1) | 18(1) |
| C(8)  | 3898(1) | 2775(4)  | 8264(1) | 16(1) |
| C(9)  | 6134(1) | 7901(4)  | 7381(1) | 14(1) |
| C(10) | 5638(1) | 10024(4) | 7156(1) | 16(1) |
| C(11) | 5642(1) | 11417(4) | 6446(1) | 16(1) |
| C(12) | 6125(1) | 10733(4) | 5942(1) | 16(1) |
| C(13) | 6604(1) | 8576(4)  | 6170(1) | 17(1) |
| C(14) | 6619(1) | 7175(4)  | 6883(1) | 15(1) |
| C(15) | 6146(2) | 12275(4) | 5188(1) | 20(1) |

**Table S7:** Bond lengths [Å] and angles [°] for **S10**.

|                  |            |                     |            |
|------------------|------------|---------------------|------------|
| S(1)-N(1)        | 1.6924(17) | C(4)-C(3)-C(2)      | 122.54(18) |
| S(1)-C(9)        | 1.771(2)   | C(8)-C(3)-C(2)      | 117.76(17) |
| O(1)-C(2)        | 1.217(2)   | C(8)-C(3)-C(4)      | 119.52(18) |
| N(1)-C(1)        | 1.472(3)   | C(3)-C(4)-H(4)      | 120.1      |
| N(1)-C(2)        | 1.383(3)   | C(5)-C(4)-C(3)      | 119.85(19) |
| C(1)-H(1A)       | 0.9800     | C(5)-C(4)-H(4)      | 120.1      |
| C(1)-H(1B)       | 0.9800     | C(4)-C(5)-H(5)      | 119.7      |
| C(1)-H(1C)       | 0.9800     | C(4)-C(5)-C(6)      | 120.58(19) |
| C(2)-C(3)        | 1.502(3)   | C(6)-C(5)-H(5)      | 119.7      |
| C(3)-C(4)        | 1.395(3)   | C(5)-C(6)-H(6)      | 120.1      |
| C(3)-C(8)        | 1.394(3)   | C(5)-C(6)-C(7)      | 119.73(19) |
| C(4)-H(4)        | 0.9500     | C(7)-C(6)-H(6)      | 120.1      |
| C(4)-C(5)        | 1.385(3)   | C(6)-C(7)-H(7)      | 120.1      |
| C(5)-H(5)        | 0.9500     | C(8)-C(7)-C(6)      | 119.89(19) |
| C(5)-C(6)        | 1.389(3)   | C(8)-C(7)-H(7)      | 120.1      |
| C(6)-H(6)        | 0.9500     | C(3)-C(8)-H(8)      | 119.8      |
| C(6)-C(7)        | 1.392(3)   | C(7)-C(8)-C(3)      | 120.43(18) |
| C(7)-H(7)        | 0.9500     | C(7)-C(8)-H(8)      | 119.8      |
| C(7)-C(8)        | 1.386(3)   | C(10)-C(9)-S(1)     | 123.91(15) |
| C(8)-H(8)        | 0.9500     | C(10)-C(9)-C(14)    | 119.67(18) |
| C(9)-C(10)       | 1.391(3)   | C(14)-C(9)-S(1)     | 116.42(16) |
| C(9)-C(14)       | 1.396(3)   | C(9)-C(10)-H(10)    | 120.2      |
| C(10)-H(10)      | 0.9500     | C(11)-C(10)-C(9)    | 119.59(19) |
| C(10)-C(11)      | 1.390(3)   | C(11)-C(10)-H(10)   | 120.2      |
| C(11)-H(11)      | 0.9500     | C(10)-C(11)-H(11)   | 119.1      |
| C(11)-C(12)      | 1.393(3)   | C(10)-C(11)-C(12)   | 121.72(19) |
| C(12)-C(13)      | 1.396(3)   | C(12)-C(11)-H(11)   | 119.1      |
| C(12)-C(15)      | 1.506(3)   | C(11)-C(12)-C(13)   | 117.65(19) |
| C(13)-H(13)      | 0.9500     | C(11)-C(12)-C(15)   | 121.46(19) |
| C(13)-C(14)      | 1.385(3)   | C(13)-C(12)-C(15)   | 120.89(19) |
| C(14)-H(14)      | 0.9500     | C(12)-C(13)-H(13)   | 119.2      |
| C(15)-H(15A)     | 0.9800     | C(14)-C(13)-C(12)   | 121.61(19) |
| C(15)-H(15B)     | 0.9800     | C(14)-C(13)-H(13)   | 119.2      |
| C(15)-H(15C)     | 0.9800     | C(9)-C(14)-H(14)    | 120.1      |
|                  |            | C(13)-C(14)-C(9)    | 119.75(19) |
| N(1)-S(1)-C(9)   | 102.88(9)  | C(13)-C(14)-H(14)   | 120.1      |
| C(1)-N(1)-S(1)   | 116.34(13) | C(12)-C(15)-H(15A)  | 109.5      |
| C(2)-N(1)-S(1)   | 121.20(14) | C(12)-C(15)-H(15B)  | 109.5      |
| C(2)-N(1)-C(1)   | 118.48(16) | C(12)-C(15)-H(15C)  | 109.5      |
| N(1)-C(1)-H(1A)  | 109.5      | H(15A)-C(15)-H(15B) | 109.5      |
| N(1)-C(1)-H(1B)  | 109.5      | H(15A)-C(15)-H(15C) | 109.5      |
| N(1)-C(1)-H(1C)  | 109.5      | H(15B)-C(15)-H(15C) | 109.5      |
| H(1A)-C(1)-H(1B) | 109.5      |                     |            |
| H(1A)-C(1)-H(1C) | 109.5      |                     |            |
| H(1B)-C(1)-H(1C) | 109.5      |                     |            |
| O(1)-C(2)-N(1)   | 121.13(18) |                     |            |
| O(1)-C(2)-C(3)   | 120.82(18) |                     |            |
| N(1)-C(2)-C(3)   | 118.05(16) |                     |            |

**Table S8:** Anisotropic displacement parameters ( $\text{\AA}^2 \times 10^3$ ) for **S10**. The anisotropic displacement factor exponent takes the form:  $-2\pi^2[h^2 a^{*2}U^{11} + \dots + 2 h k a^* b^* U^{12}]$ .

|       | U <sup>11</sup> | U <sup>22</sup> | U <sup>33</sup> | U <sup>23</sup> | U <sup>13</sup> | U <sup>12</sup> |
|-------|-----------------|-----------------|-----------------|-----------------|-----------------|-----------------|
| S(1)  | 15(1)           | 14(1)           | 16(1)           | 1(1)            | 9(1)            | 2(1)            |
| O(1)  | 22(1)           | 19(1)           | 18(1)           | -3(1)           | 13(1)           | -1(1)           |
| N(1)  | 16(1)           | 15(1)           | 15(1)           | -3(1)           | 9(1)            | -2(1)           |
| C(1)  | 20(1)           | 19(1)           | 18(1)           | -6(1)           | 9(1)            | -5(1)           |
| C(2)  | 14(1)           | 12(1)           | 13(1)           | 4(1)            | 6(1)            | 3(1)            |
| C(3)  | 13(1)           | 13(1)           | 16(1)           | -1(1)           | 8(1)            | 2(1)            |
| C(4)  | 15(1)           | 15(1)           | 17(1)           | 2(1)            | 9(1)            | 2(1)            |
| C(5)  | 16(1)           | 20(1)           | 15(1)           | 1(1)            | 7(1)            | 3(1)            |
| C(6)  | 15(1)           | 17(1)           | 22(1)           | -5(1)           | 8(1)            | -1(1)           |
| C(7)  | 16(1)           | 14(1)           | 25(1)           | 3(1)            | 12(1)           | 0(1)            |
| C(8)  | 15(1)           | 18(1)           | 16(1)           | 4(1)            | 8(1)            | 3(1)            |
| C(9)  | 13(1)           | 15(1)           | 13(1)           | -2(1)           | 6(1)            | -5(1)           |
| C(10) | 15(1)           | 18(1)           | 17(1)           | -3(1)           | 8(1)            | -1(1)           |
| C(11) | 16(1)           | 13(1)           | 19(1)           | 0(1)            | 7(1)            | -2(1)           |
| C(12) | 15(1)           | 17(1)           | 15(1)           | -2(1)           | 6(1)            | -6(1)           |
| C(13) | 17(1)           | 18(1)           | 18(1)           | -5(1)           | 11(1)           | -5(1)           |
| C(14) | 15(1)           | 14(1)           | 17(1)           | -2(1)           | 8(1)            | -1(1)           |
| C(15) | 24(1)           | 21(1)           | 18(1)           | 1(1)            | 11(1)           | -4(1)           |

**Table S9:** Hydrogen coordinates ( $\times 10^4$ ) and isotropic displacement parameters ( $\text{\AA}^2 \times 10^3$ ) for **S10**.

|        | x    | y     | z     | U(eq) |
|--------|------|-------|-------|-------|
| H(1A)  | 6604 | 8504  | 10015 | 29    |
| H(1B)  | 5688 | 10176 | 9619  | 29    |
| H(1C)  | 6437 | 10361 | 9205  | 29    |
| H(4)   | 4153 | 6584  | 6866  | 18    |
| H(5)   | 3156 | 3911  | 5749  | 21    |
| H(6)   | 2635 | 509   | 6200  | 22    |
| H(7)   | 3108 | -213  | 7786  | 21    |
| H(8)   | 4083 | 2488  | 8906  | 19    |
| H(10)  | 5298 | 10520 | 7485  | 19    |
| H(11)  | 5308 | 12872 | 6300  | 20    |
| H(13)  | 6926 | 8056  | 5828  | 20    |
| H(14)  | 6959 | 5727  | 7033  | 18    |
| H(15A) | 5560 | 13208 | 4901  | 31    |
| H(15B) | 6196 | 11283 | 4713  | 31    |
| H(15C) | 6694 | 13337 | 5460  | 31    |

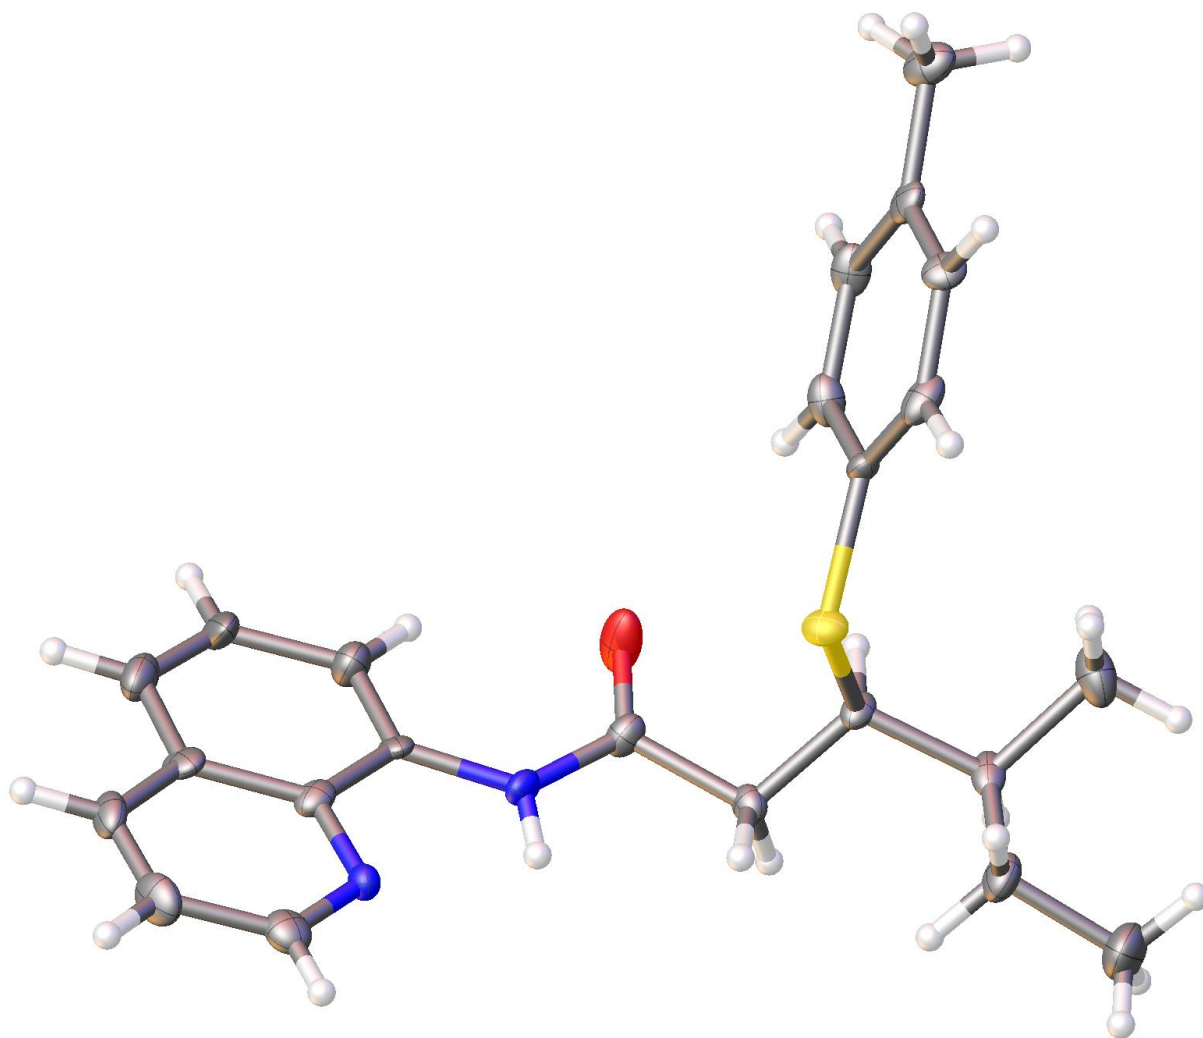

## Experimental Summary

The single crystal X-ray diffraction studies were carried out on a Bruker ApexII-Ultra CCD diffractometer equipped with Mo K $\alpha$  radiation ( $\lambda = 0.7107 \text{ \AA}$ ).

Crystals of the subject compound were used as received. A  $0.21 \times 0.18 \times 0.17 \text{ mm}$  piece of a colorless crystal was mounted on a Cryoloop with Paratone oil. Data were collected in a nitrogen gas stream at 100(2) K using  $\omega$  scans. Crystal-to-detector distance was 50 mm and exposure time was 5 seconds per frame using a scan width of  $0.70^\circ$ . Data collection was 100 % complete to  $25.242^\circ$  in  $\theta$ . A total of 44094 reflections were collected covering the indices,  $-9 \leq h \leq 9$ ,  $-13 \leq k \leq 13$ ,  $-31 \leq l \leq 31$ . 8011 reflections were found to be symmetry independent, with a  $R_{\text{int}}$  of 0.0445. Indexing and unit cell refinement indicated a Primitive, Monoclinic lattice. The space group was found to be  $P_n$ . The data were integrated using the Bruker SAINT Software program and scaled using the SADABS software program. Solution by direct methods (SHELXT) produced a complete phasing model consistent with the proposed structure.

All nonhydrogen atoms were refined anisotropically by full-matrix least-squares (SHELXL-2014). All carbon bonded hydrogen atoms were placed using a riding model. Their positions were constrained relative to their parent atom using the appropriate HFIX command in SHELXL-2014. Crystallographic data are summarized in **Table S10**.

Notes: Great data! Absolute stereochemistry was conclusively assigned (Flack =  $-0.03(4)$ ). There are two copies of the compound in the asymmetric unit. The crystal was a pseudomerohedral twin. There is excess electron density near the H17 hydrogen that could not be modeled. The chemical formula of the compound is:  $\text{C}_{23}\text{H}_{26}\text{N}_2\text{O}_2\text{S}$

**Table S10:** Crystal data and structure refinement for **3a** (CCDC 2154909).

|                                   |                                                    |                 |
|-----------------------------------|----------------------------------------------------|-----------------|
| Identification code               | pn                                                 |                 |
| Empirical formula                 | C <sub>23</sub> H <sub>26</sub> N <sub>2</sub> O S |                 |
| Formula weight                    | 378.52                                             |                 |
| Temperature                       | 100.15 K                                           |                 |
| Wavelength                        | 0.71073 Å                                          |                 |
| Crystal system                    | Monoclinic                                         |                 |
| Space group                       | P 1 n 1                                            |                 |
| Unit cell dimensions              | a = 7.7413(14) Å                                   | α = 90°.        |
|                                   | b = 10.5757(19) Å                                  | β = 98.727(5)°. |
|                                   | c = 25.507(5) Å                                    | γ = 90°.        |
| Volume                            | 2064.1(7) Å <sup>3</sup>                           |                 |
| Z                                 | 4                                                  |                 |
| Density (calculated)              | 1.218 Mg/m <sup>3</sup>                            |                 |
| Absorption coefficient            | 0.171 mm <sup>-1</sup>                             |                 |
| F(000)                            | 808                                                |                 |
| Crystal size                      | 0.21 x 0.18 x 0.17 mm <sup>3</sup>                 |                 |
| Theta range for data collection   | 1.615 to 26.066°.                                  |                 |
| Index ranges                      | -9<=h<=9, -13<=k<=13, -31<=l<=31                   |                 |
| Reflections collected             | 19359                                              |                 |
| Independent reflections           | 8011 [R(int) = 0.0445]                             |                 |
| Completeness to theta = 25.242°   | 100.0 %                                            |                 |
| Absorption correction             | Semi-empirical from equivalents                    |                 |
| Max. and min. transmission        | 0.7453 and 0.5793                                  |                 |
| Refinement method                 | Full-matrix least-squares on F <sup>2</sup>        |                 |
| Data / restraints / parameters    | 8011 / 2 / 494                                     |                 |
| Goodness-of-fit on F <sup>2</sup> | 1.072                                              |                 |
| Final R indices [I>2sigma(I)]     | R1 = 0.0529, wR2 = 0.1285                          |                 |
| R indices (all data)              | R1 = 0.0541, wR2 = 0.1298                          |                 |
| Absolute structure parameter      | -0.03(4)                                           |                 |
| Largest diff. peak and hole       | 1.357 and -0.293 e.Å <sup>-3</sup>                 |                 |

**Table S11:** Atomic coordinates ( $\times 10^4$ ) and equivalent isotropic displacement parameters ( $\text{\AA}^2 \times 10^3$ ) for **3a**.  
 $U(\text{eq})$  is defined as one third of the trace of the orthogonalized  $U^{ij}$  tensor.

|        | x        | y        | z       | $U(\text{eq})$ |
|--------|----------|----------|---------|----------------|
| S(1A)  | 4789(2)  | 2278(1)  | 6091(1) | 20(1)          |
| O(1A)  | 6362(6)  | 2606(5)  | 7445(2) | 37(1)          |
| N(1A)  | 3533(6)  | 2154(4)  | 7512(2) | 19(1)          |
| N(2A)  | 712(6)   | 771(4)   | 7605(2) | 18(1)          |
| C(9A)  | 4843(9)  | 4930(5)  | 6073(2) | 22(1)          |
| C(6A)  | 6874(10) | 1174(5)  | 5454(2) | 25(1)          |
| C(19A) | 2276(8)  | -508(5)  | 8324(2) | 22(1)          |
| C(20A) | 746(10)  | -1201(5) | 8329(2) | 26(1)          |
| C(16A) | 5240(9)  | 953(6)   | 8226(2) | 27(1)          |
| C(14A) | 4799(7)  | 2790(6)  | 7311(2) | 20(1)          |
| C(7A)  | 6833(7)  | 1745(5)  | 5947(2) | 16(1)          |
| C(23A) | 2207(8)  | 478(5)   | 7936(2) | 19(1)          |
| C(15A) | 3718(7)  | 1201(5)  | 7901(2) | 16(1)          |
| C(21A) | -753(9)  | -908(6)  | 8001(3) | 30(1)          |
| C(8A)  | 5231(8)  | 3791(5)  | 6443(2) | 17(1)          |
| C(18A) | 3881(10) | -733(6)  | 8661(2) | 29(2)          |
| C(11A) | 2920(9)  | 5026(6)  | 5823(2) | 28(1)          |
| C(4A)  | 11496(8) | -16(6)   | 5549(3) | 27(1)          |
| C(22A) | -715(9)  | 111(6)   | 7644(2) | 26(1)          |
| C(13A) | 4125(8)  | 3780(5)  | 6894(2) | 18(1)          |
| C(3A)  | 9907(8)  | 596(5)   | 5684(2) | 21(1)          |
| C(1A)  | 8361(8)  | 1753(6)  | 6309(2) | 22(1)          |
| C(10A) | 6112(10) | 4995(7)  | 5662(3) | 33(2)          |
| C(17A) | 5330(10) | 1(7)     | 8626(3) | 40(2)          |
| C(5A)  | 8367(8)  | 612(5)   | 5327(2) | 19(1)          |
| C(12A) | 2477(13) | 6230(8)  | 5505(3) | 45(2)          |
| C(2A)  | 9877(8)  | 1208(6)  | 6172(2) | 23(1)          |
| S(1)   | 5986(2)  | 4725(1)  | 3886(1) | 23(1)          |
| O(1)   | 6070(9)  | 5504(7)  | 2472(2) | 69(2)          |
| N(2)   | 573(6)   | 3238(4)  | 2451(2) | 18(1)          |
| N(1)   | 3441(6)  | 4653(4)  | 2542(2) | 19(1)          |



|       |          |         |         |       |
|-------|----------|---------|---------|-------|
| C(6)  | 8664(8)  | 3696(5) | 4560(2) | 19(1) |
| C(8)  | 6139(8)  | 6278(5) | 3579(2) | 19(1) |
| C(22) | -839(8)  | 2529(6) | 2418(2) | 24(1) |
| C(15) | 3311(8)  | 3703(5) | 2155(2) | 19(1) |
| C(23) | 1758(7)  | 2949(5) | 2122(2) | 17(1) |
| C(16) | 4532(8)  | 3450(6) | 1824(2) | 28(1) |
| C(13) | 4555(9)  | 6356(5) | 3131(2) | 21(1) |
| C(3)  | 11493(7) | 3168(5) | 4347(2) | 18(1) |
| C(9)  | 6231(8)  | 7389(5) | 3972(2) | 22(1) |
| C(2)  | 11029(8) | 3694(5) | 3853(2) | 23(1) |
| C(7)  | 8173(8)  | 4220(5) | 4056(2) | 20(1) |
| C(11) | 4596(10) | 7497(6) | 4239(2) | 29(1) |
| C(1)  | 9379(8)  | 4206(5) | 3698(2) | 20(1) |
| C(5)  | 10268(8) | 3174(6) | 4695(2) | 22(1) |
| C(18) | 2783(10) | 1701(6) | 1420(2) | 32(2) |
| C(21) | -1203(9) | 1516(6) | 2062(2) | 28(1) |
| C(19) | 1502(8)  | 1934(5) | 1752(2) | 23(1) |
| C(17) | 4226(9)  | 2462(7) | 1458(2) | 31(2) |
| C(4)  | 13232(8) | 2536(7) | 4497(3) | 27(1) |
| C(14) | 4772(8)  | 5475(6) | 2686(2) | 25(1) |
| C(20) | -18(10)  | 1211(5) | 1742(2) | 30(1) |
| C(10) | 7920(9)  | 7311(7) | 4382(3) | 30(2) |
| C(12) | 4593(16) | 8631(8) | 4605(3) | 53(2) |

---

**Table S12:** Bond lengths [Å] and angles [°] for **3a**.

---

|               |           |               |          |
|---------------|-----------|---------------|----------|
| S(1A)-C(7A)   | 1.770(5)  | C(11A)-C(12A) | 1.521(9) |
| S(1A)-C(8A)   | 1.840(5)  | C(4A)-H(4AA)  | 0.9800   |
| O(1A)-C(14A)  | 1.222(7)  | C(4A)-H(4AB)  | 0.9800   |
| N(1A)-H(1A)   | 0.8800    | C(4A)-H(4AC)  | 0.9800   |
| N(1A)-C(14A)  | 1.352(7)  | C(4A)-C(3A)   | 1.477(9) |
| N(1A)-C(15A)  | 1.405(7)  | C(22A)-H(22A) | 0.9500   |
| N(2A)-C(23A)  | 1.360(8)  | C(13A)-H(13A) | 0.9900   |
| N(2A)-C(22A)  | 1.323(8)  | C(13A)-H(13B) | 0.9900   |
| C(9A)-H(9A)   | 1.0000    | C(3A)-C(5A)   | 1.386(8) |
| C(9A)-C(8A)   | 1.531(7)  | C(3A)-C(2A)   | 1.406(8) |
| C(9A)-C(11A)  | 1.532(10) | C(1A)-H(1AA)  | 0.9500   |
| C(9A)-C(10A)  | 1.543(9)  | C(1A)-C(2A)   | 1.398(9) |
| C(6A)-H(6A)   | 0.9500    | C(10A)-H(10A) | 0.9800   |
| C(6A)-C(7A)   | 1.398(8)  | C(10A)-H(10B) | 0.9800   |
| C(6A)-C(5A)   | 1.381(9)  | C(10A)-H(10C) | 0.9800   |
| C(19A)-C(20A) | 1.394(9)  | C(17A)-H(17A) | 0.9500   |
| C(19A)-C(23A) | 1.432(8)  | C(5A)-H(5A)   | 0.9500   |
| C(19A)-C(18A) | 1.419(9)  | C(12A)-H(12A) | 0.9800   |
| C(20A)-H(20A) | 0.9500    | C(12A)-H(12B) | 0.9800   |
| C(20A)-C(21A) | 1.360(10) | C(12A)-H(12C) | 0.9800   |
| C(16A)-H(16A) | 0.9500    | C(2A)-H(2A)   | 0.9500   |
| C(16A)-C(15A) | 1.360(8)  | S(1)-C(8)     | 1.832(6) |
| C(16A)-C(17A) | 1.426(8)  | S(1)-C(7)     | 1.766(6) |
| C(14A)-C(13A) | 1.528(7)  | O(1)-C(14)    | 1.215(8) |
| C(7A)-C(1A)   | 1.387(8)  | N(2)-C(22)    | 1.317(7) |
| C(23A)-C(15A) | 1.412(8)  | N(2)-C(23)    | 1.369(7) |
| C(21A)-H(21A) | 0.9500    | N(1)-H(1)     | 0.8800   |
| C(21A)-C(22A) | 1.414(9)  | N(1)-C(15)    | 1.401(7) |
| C(8A)-H(8A)   | 1.0000    | N(1)-C(14)    | 1.355(7) |
| C(8A)-C(13A)  | 1.534(7)  | C(6)-H(6)     | 0.9500   |
| C(18A)-H(18A) | 0.9500    | C(6)-C(7)     | 1.400(8) |
| C(18A)-C(17A) | 1.378(10) | C(6)-C(5)     | 1.355(9) |
| C(11A)-H(11A) | 0.9900    | C(8)-H(8)     | 1.0000   |
| C(11A)-H(11B) | 0.9900    | C(8)-C(13)    | 1.546(8) |

|              |           |                      |          |
|--------------|-----------|----------------------|----------|
| C(8)-C(9)    | 1.540(7)  | C(10)-H(10D)         | 0.9800   |
| C(22)-H(22)  | 0.9500    | C(10)-H(10E)         | 0.9800   |
| C(22)-C(21)  | 1.405(9)  | C(10)-H(10F)         | 0.9800   |
| C(15)-C(23)  | 1.435(8)  | C(12)-H(12D)         | 0.9800   |
| C(15)-C(16)  | 1.385(8)  | C(12)-H(12E)         | 0.9800   |
| C(23)-C(19)  | 1.424(7)  | C(12)-H(12F)         | 0.9800   |
| C(16)-H(16)  | 0.9500    |                      |          |
| C(16)-C(17)  | 1.398(9)  | C(7A)-S(1A)-C(8A)    | 105.8(3) |
| C(13)-H(13C) | 0.9900    | C(14A)-N(1A)-H(1A)   | 115.8    |
| C(13)-H(13D) | 0.9900    | C(14A)-N(1A)-C(15A)  | 128.4(5) |
| C(13)-C(14)  | 1.497(8)  | C(15A)-N(1A)-H(1A)   | 115.8    |
| C(3)-C(2)    | 1.373(8)  | C(22A)-N(2A)-C(23A)  | 118.4(5) |
| C(3)-C(5)    | 1.395(8)  | C(8A)-C(9A)-H(9A)    | 106.1    |
| C(3)-C(4)    | 1.500(8)  | C(8A)-C(9A)-C(11A)   | 113.3(5) |
| C(9)-H(9)    | 1.0000    | C(8A)-C(9A)-C(10A)   | 111.6(5) |
| C(9)-C(11)   | 1.530(9)  | C(11A)-C(9A)-H(9A)   | 106.1    |
| C(9)-C(10)   | 1.547(9)  | C(11A)-C(9A)-C(10A)  | 113.1(5) |
| C(2)-H(2)    | 0.9500    | C(10A)-C(9A)-H(9A)   | 106.1    |
| C(2)-C(1)    | 1.389(9)  | C(7A)-C(6A)-H(6A)    | 119.0    |
| C(7)-C(1)    | 1.400(8)  | C(5A)-C(6A)-H(6A)    | 119.0    |
| C(11)-H(11C) | 0.9900    | C(5A)-C(6A)-C(7A)    | 122.0(6) |
| C(11)-H(11D) | 0.9900    | C(20A)-C(19A)-C(23A) | 116.5(5) |
| C(11)-C(12)  | 1.519(9)  | C(20A)-C(19A)-C(18A) | 124.9(5) |
| C(1)-H(1B)   | 0.9500    | C(18A)-C(19A)-C(23A) | 118.5(5) |
| C(5)-H(5)    | 0.9500    | C(19A)-C(20A)-H(20A) | 119.3    |
| C(18)-H(18)  | 0.9500    | C(21A)-C(20A)-C(19A) | 121.4(5) |
| C(18)-C(19)  | 1.419(9)  | C(21A)-C(20A)-H(20A) | 119.3    |
| C(18)-C(17)  | 1.368(10) | C(15A)-C(16A)-H(16A) | 119.5    |
| C(21)-H(21)  | 0.9500    | C(15A)-C(16A)-C(17A) | 121.1(6) |
| C(21)-C(20)  | 1.357(10) | C(17A)-C(16A)-H(16A) | 119.5    |
| C(19)-C(20)  | 1.400(9)  | O(1A)-C(14A)-N(1A)   | 124.0(5) |
| C(17)-H(17)  | 0.9500    | O(1A)-C(14A)-C(13A)  | 121.5(5) |
| C(4)-H(4A)   | 0.9800    | N(1A)-C(14A)-C(13A)  | 114.5(5) |
| C(4)-H(4B)   | 0.9800    | C(6A)-C(7A)-S(1A)    | 117.9(5) |
| C(4)-H(4C)   | 0.9800    | C(1A)-C(7A)-S(1A)    | 123.9(4) |
| C(20)-H(20)  | 0.9500    | C(1A)-C(7A)-C(6A)    | 117.9(5) |

|                      |          |                      |          |
|----------------------|----------|----------------------|----------|
| N(2A)-C(23A)-C(19A)  | 122.2(5) | C(8A)-C(13A)-H(13A)  | 109.5    |
| N(2A)-C(23A)-C(15A)  | 118.2(5) | C(8A)-C(13A)-H(13B)  | 109.5    |
| C(15A)-C(23A)-C(19A) | 119.6(5) | H(13A)-C(13A)-H(13B) | 108.0    |
| N(1A)-C(15A)-C(23A)  | 115.9(5) | C(5A)-C(3A)-C(4A)    | 121.0(5) |
| C(16A)-C(15A)-N(1A)  | 123.7(5) | C(5A)-C(3A)-C(2A)    | 116.6(6) |
| C(16A)-C(15A)-C(23A) | 120.4(5) | C(2A)-C(3A)-C(4A)    | 122.4(5) |
| C(20A)-C(21A)-H(21A) | 120.9    | C(7A)-C(1A)-H(1AA)   | 120.1    |
| C(20A)-C(21A)-C(22A) | 118.1(6) | C(7A)-C(1A)-C(2A)    | 119.7(5) |
| C(22A)-C(21A)-H(21A) | 120.9    | C(2A)-C(1A)-H(1AA)   | 120.1    |
| S(1A)-C(8A)-H(8A)    | 108.5    | C(9A)-C(10A)-H(10A)  | 109.5    |
| C(9A)-C(8A)-S(1A)    | 112.3(3) | C(9A)-C(10A)-H(10B)  | 109.5    |
| C(9A)-C(8A)-H(8A)    | 108.5    | C(9A)-C(10A)-H(10C)  | 109.5    |
| C(9A)-C(8A)-C(13A)   | 112.8(5) | H(10A)-C(10A)-H(10B) | 109.5    |
| C(13A)-C(8A)-S(1A)   | 106.0(4) | H(10A)-C(10A)-H(10C) | 109.5    |
| C(13A)-C(8A)-H(8A)   | 108.5    | H(10B)-C(10A)-H(10C) | 109.5    |
| C(19A)-C(18A)-H(18A) | 119.6    | C(16A)-C(17A)-H(17A) | 120.3    |
| C(17A)-C(18A)-C(19A) | 120.8(6) | C(18A)-C(17A)-C(16A) | 119.4(7) |
| C(17A)-C(18A)-H(18A) | 119.6    | C(18A)-C(17A)-H(17A) | 120.3    |
| C(9A)-C(11A)-H(11A)  | 108.8    | C(6A)-C(5A)-C(3A)    | 121.2(5) |
| C(9A)-C(11A)-H(11B)  | 108.8    | C(6A)-C(5A)-H(5A)    | 119.4    |
| H(11A)-C(11A)-H(11B) | 107.7    | C(3A)-C(5A)-H(5A)    | 119.4    |
| C(12A)-C(11A)-C(9A)  | 113.8(6) | C(11A)-C(12A)-H(12A) | 109.5    |
| C(12A)-C(11A)-H(11A) | 108.8    | C(11A)-C(12A)-H(12B) | 109.5    |
| C(12A)-C(11A)-H(11B) | 108.8    | C(11A)-C(12A)-H(12C) | 109.5    |
| H(4AA)-C(4A)-H(4AB)  | 109.5    | H(12A)-C(12A)-H(12B) | 109.5    |
| H(4AA)-C(4A)-H(4AC)  | 109.5    | H(12A)-C(12A)-H(12C) | 109.5    |
| H(4AB)-C(4A)-H(4AC)  | 109.5    | H(12B)-C(12A)-H(12C) | 109.5    |
| C(3A)-C(4A)-H(4AA)   | 109.5    | C(3A)-C(2A)-H(2A)    | 118.8    |
| C(3A)-C(4A)-H(4AB)   | 109.5    | C(1A)-C(2A)-C(3A)    | 122.5(5) |
| C(3A)-C(4A)-H(4AC)   | 109.5    | C(1A)-C(2A)-H(2A)    | 118.8    |
| N(2A)-C(22A)-C(21A)  | 123.3(6) | C(7)-S(1)-C(8)       | 104.7(3) |
| N(2A)-C(22A)-H(22A)  | 118.4    | C(22)-N(2)-C(23)     | 117.4(5) |
| C(21A)-C(22A)-H(22A) | 118.4    | C(15)-N(1)-H(1)      | 115.8    |
| C(14A)-C(13A)-C(8A)  | 110.9(5) | C(14)-N(1)-H(1)      | 115.8    |
| C(14A)-C(13A)-H(13A) | 109.5    | C(14)-N(1)-C(15)     | 128.4(5) |
| C(14A)-C(13A)-H(13B) | 109.5    | C(7)-C(6)-H(6)       | 119.8    |

|                     |          |                     |          |
|---------------------|----------|---------------------|----------|
| C(5)-C(6)-H(6)      | 119.8    | C(3)-C(2)-C(1)      | 121.3(5) |
| C(5)-C(6)-C(7)      | 120.4(5) | C(1)-C(2)-H(2)      | 119.3    |
| S(1)-C(8)-H(8)      | 108.0    | C(6)-C(7)-S(1)      | 117.5(4) |
| C(13)-C(8)-S(1)     | 105.5(4) | C(6)-C(7)-C(1)      | 118.7(5) |
| C(13)-C(8)-H(8)     | 108.0    | C(1)-C(7)-S(1)      | 123.5(4) |
| C(9)-C(8)-S(1)      | 113.9(4) | C(9)-C(11)-H(11C)   | 108.7    |
| C(9)-C(8)-H(8)      | 108.0    | C(9)-C(11)-H(11D)   | 108.7    |
| C(9)-C(8)-C(13)     | 113.2(5) | H(11C)-C(11)-H(11D) | 107.6    |
| N(2)-C(22)-H(22)    | 118.0    | C(12)-C(11)-C(9)    | 114.3(7) |
| N(2)-C(22)-C(21)    | 124.0(6) | C(12)-C(11)-H(11C)  | 108.7    |
| C(21)-C(22)-H(22)   | 118.0    | C(12)-C(11)-H(11D)  | 108.7    |
| N(1)-C(15)-C(23)    | 114.2(5) | C(2)-C(1)-C(7)      | 119.6(5) |
| C(16)-C(15)-N(1)    | 125.8(5) | C(2)-C(1)-H(1B)     | 120.2    |
| C(16)-C(15)-C(23)   | 120.0(5) | C(7)-C(1)-H(1B)     | 120.2    |
| N(2)-C(23)-C(15)    | 118.3(5) | C(6)-C(5)-C(3)      | 121.7(5) |
| N(2)-C(23)-C(19)    | 122.5(5) | C(6)-C(5)-H(5)      | 119.2    |
| C(19)-C(23)-C(15)   | 119.3(5) | C(3)-C(5)-H(5)      | 119.2    |
| C(15)-C(16)-H(16)   | 120.3    | C(19)-C(18)-H(18)   | 120.3    |
| C(15)-C(16)-C(17)   | 119.3(6) | C(17)-C(18)-H(18)   | 120.3    |
| C(17)-C(16)-H(16)   | 120.3    | C(17)-C(18)-C(19)   | 119.5(5) |
| C(8)-C(13)-H(13C)   | 109.4    | C(22)-C(21)-H(21)   | 120.6    |
| C(8)-C(13)-H(13D)   | 109.4    | C(20)-C(21)-C(22)   | 118.8(6) |
| H(13C)-C(13)-H(13D) | 108.0    | C(20)-C(21)-H(21)   | 120.6    |
| C(14)-C(13)-C(8)    | 111.0(6) | C(18)-C(19)-C(23)   | 119.2(5) |
| C(14)-C(13)-H(13C)  | 109.4    | C(20)-C(19)-C(23)   | 117.1(5) |
| C(14)-C(13)-H(13D)  | 109.4    | C(20)-C(19)-C(18)   | 123.8(5) |
| C(2)-C(3)-C(5)      | 118.3(5) | C(16)-C(17)-H(17)   | 118.6    |
| C(2)-C(3)-C(4)      | 121.0(5) | C(18)-C(17)-C(16)   | 122.8(6) |
| C(5)-C(3)-C(4)      | 120.7(5) | C(18)-C(17)-H(17)   | 118.6    |
| C(8)-C(9)-H(9)      | 107.0    | C(3)-C(4)-H(4A)     | 109.5    |
| C(8)-C(9)-C(10)     | 110.5(5) | C(3)-C(4)-H(4B)     | 109.5    |
| C(11)-C(9)-C(8)     | 112.8(5) | C(3)-C(4)-H(4C)     | 109.5    |
| C(11)-C(9)-H(9)     | 107.0    | H(4A)-C(4)-H(4B)    | 109.5    |
| C(11)-C(9)-C(10)    | 112.0(5) | H(4A)-C(4)-H(4C)    | 109.5    |
| C(10)-C(9)-H(9)     | 107.0    | H(4B)-C(4)-H(4C)    | 109.5    |
| C(3)-C(2)-H(2)      | 119.3    | O(1)-C(14)-N(1)     | 122.8(5) |

|                     |          |
|---------------------|----------|
| O(1)-C(14)-C(13)    | 121.4(6) |
| N(1)-C(14)-C(13)    | 115.9(5) |
| C(21)-C(20)-C(19)   | 120.2(5) |
| C(21)-C(20)-H(20)   | 119.9    |
| C(19)-C(20)-H(20)   | 119.9    |
| C(9)-C(10)-H(10D)   | 109.5    |
| C(9)-C(10)-H(10E)   | 109.5    |
| C(9)-C(10)-H(10F)   | 109.5    |
| H(10D)-C(10)-H(10E) | 109.5    |
| H(10D)-C(10)-H(10F) | 109.5    |
| H(10E)-C(10)-H(10F) | 109.5    |
| C(11)-C(12)-H(12D)  | 109.5    |
| C(11)-C(12)-H(12E)  | 109.5    |
| C(11)-C(12)-H(12F)  | 109.5    |
| H(12D)-C(12)-H(12E) | 109.5    |
| H(12D)-C(12)-H(12F) | 109.5    |
| H(12E)-C(12)-H(12F) | 109.5    |

Symmetry transformations used to generate equivalent atoms

**Table S13:** Anisotropic displacement parameters ( $\text{\AA}^2 \times 10^3$ ) for **3a**. The anisotropic displacement factor exponent takes the form:  $-2\pi^2[h^2 a^{*2}U^{11} + \dots + 2 h k a^* b^* U^{12}]$ .

|        | U <sup>11</sup> | U <sup>22</sup> | U <sup>33</sup> | U <sup>23</sup> | U <sup>13</sup> | U <sup>12</sup> |
|--------|-----------------|-----------------|-----------------|-----------------|-----------------|-----------------|
| S(1A)  | 20(1)           | 15(1)           | 27(1)           | -5(1)           | 4(1)            | -1(1)           |
| O(1A)  | 21(2)           | 44(3)           | 43(2)           | 21(2)           | -3(2)           | -11(2)          |
| N(1A)  | 22(2)           | 21(2)           | 16(2)           | 5(2)            | 2(2)            | 7(2)            |
| N(2A)  | 19(2)           | 16(2)           | 19(2)           | 4(2)            | 7(2)            | 1(2)            |
| C(9A)  | 39(3)           | 11(2)           | 16(2)           | -3(2)           | 11(2)           | -1(3)           |
| C(6A)  | 37(4)           | 12(3)           | 22(2)           | 0(2)            | -4(3)           | 0(3)            |
| C(19A) | 25(3)           | 10(2)           | 32(3)           | 0(2)            | 9(2)            | 6(2)            |
| C(20A) | 42(4)           | 12(2)           | 26(3)           | 3(2)            | 15(3)           | 1(3)            |
| C(16A) | 28(4)           | 25(3)           | 28(3)           | 9(2)            | 5(3)            | 4(3)            |
| C(14A) | 21(3)           | 17(3)           | 21(2)           | 2(2)            | -2(2)           | -1(2)           |
| C(7A)  | 13(3)           | 15(2)           | 19(2)           | 5(2)            | 3(2)            | 4(2)            |
| C(23A) | 27(3)           | 13(3)           | 19(2)           | -3(2)           | 3(2)            | 4(2)            |
| C(15A) | 17(3)           | 10(2)           | 22(2)           | 2(2)            | 8(2)            | 6(2)            |
| C(21A) | 33(4)           | 21(3)           | 40(3)           | -2(3)           | 15(3)           | -11(3)          |
| C(8A)  | 25(3)           | 11(2)           | 14(2)           | -2(2)           | 3(2)            | 2(2)            |
| C(18A) | 44(4)           | 24(3)           | 21(3)           | 7(2)            | 9(3)            | 9(3)            |
| C(11A) | 38(3)           | 16(3)           | 29(3)           | 6(2)            | 6(3)            | 2(3)            |
| C(4A)  | 24(3)           | 15(3)           | 42(4)           | 0(2)            | 2(3)            | -1(2)           |
| C(22A) | 31(4)           | 24(3)           | 25(3)           | -6(2)           | 10(3)           | 0(3)            |
| C(13A) | 21(3)           | 15(3)           | 20(3)           | 0(2)            | 7(2)            | -3(2)           |
| C(3A)  | 22(3)           | 12(2)           | 29(3)           | 8(2)            | 3(2)            | -2(2)           |
| C(1A)  | 26(3)           | 23(3)           | 17(2)           | 0(2)            | 1(2)            | -10(2)          |
| C(10A) | 41(4)           | 34(4)           | 26(3)           | 2(3)            | 10(3)           | -13(3)          |
| C(17A) | 39(4)           | 31(4)           | 57(4)           | 28(3)           | 28(3)           | 21(3)           |
| C(5A)  | 23(3)           | 12(2)           | 22(3)           | -6(2)           | 2(2)            | 0(2)            |
| C(12A) | 54(5)           | 41(4)           | 40(4)           | 20(3)           | 12(4)           | 14(4)           |
| C(2A)  | 20(3)           | 24(3)           | 21(3)           | 2(2)            | -5(2)           | -10(3)          |
| S(1)   | 19(1)           | 12(1)           | 39(1)           | 5(1)            | 8(1)            | -2(1)           |
| O(1)   | 66(4)           | 94(5)           | 59(3)           | -55(4)          | 47(3)           | -56(4)          |
| N(2)   | 17(2)           | 17(2)           | 19(2)           | 3(2)            | -1(2)           | -2(2)           |

|       |       |       |       |        |       |        |
|-------|-------|-------|-------|--------|-------|--------|
| N(1)  | 18(2) | 20(2) | 19(2) | -10(2) | 5(2)  | -9(2)  |
| C(6)  | 23(3) | 19(3) | 16(2) | 0(2)   | 9(2)  | -2(2)  |
| C(8)  | 19(3) | 14(3) | 26(3) | 1(2)   | 5(2)  | -1(2)  |
| C(22) | 25(3) | 23(3) | 24(3) | 4(2)   | 5(2)  | -8(3)  |
| C(15) | 27(3) | 14(2) | 16(2) | 0(2)   | 1(2)  | 1(2)   |
| C(23) | 23(3) | 9(2)  | 18(2) | 4(2)   | -3(2) | 4(2)   |
| C(16) | 23(3) | 35(3) | 27(3) | -11(3) | 9(3)  | -4(3)  |
| C(13) | 35(4) | 11(2) | 16(2) | 3(2)   | -3(2) | -5(2)  |
| C(3)  | 18(3) | 15(3) | 20(2) | -1(2)  | -2(2) | -4(2)  |
| C(9)  | 27(3) | 12(2) | 25(3) | -5(2)  | 1(2)  | -3(2)  |
| C(2)  | 22(3) | 24(3) | 23(2) | 0(2)   | 6(2)  | -7(3)  |
| C(7)  | 21(3) | 12(3) | 27(3) | 1(2)   | 5(2)  | -1(2)  |
| C(11) | 44(4) | 24(3) | 22(3) | -5(2)  | 11(3) | 3(3)   |
| C(1)  | 31(3) | 15(2) | 14(2) | 3(2)   | 7(2)  | 7(2)   |
| C(5)  | 28(3) | 25(3) | 15(2) | 0(2)   | 4(2)  | -7(3)  |
| C(18) | 40(4) | 24(3) | 30(3) | -9(2)  | 1(3)  | 8(3)   |
| C(21) | 35(4) | 20(3) | 29(3) | 6(2)   | 4(3)  | -15(3) |
| C(19) | 26(3) | 17(3) | 21(3) | -4(2)  | -5(2) | 6(2)   |
| C(17) | 31(3) | 48(4) | 18(3) | -4(3)  | 15(2) | -1(3)  |
| C(4)  | 20(3) | 31(3) | 29(3) | 11(3)  | 4(2)  | 7(3)   |
| C(14) | 30(3) | 21(3) | 23(3) | -7(2)  | 6(3)  | -13(3) |
| C(20) | 45(4) | 11(3) | 31(3) | -4(2)  | -3(3) | -3(3)  |
| C(10) | 35(4) | 20(3) | 36(3) | 0(3)   | 3(3)  | 3(3)   |
| C(12) | 91(7) | 40(4) | 33(3) | -17(3) | 27(4) | -11(4) |

---



**Table 14.** Hydrogen coordinates ( $\times 10^4$ ) and isotropic displacement parameters ( $\text{\AA}^2 \times 10^3$ ) for **3a**.

|        | x     | y     | z    | U(eq) |
|--------|-------|-------|------|-------|
| H(1A)  | 2452  | 2365  | 7383 | 23    |
| H(9A)  | 5089  | 5697  | 6302 | 26    |
| H(6A)  | 5843  | 1172  | 5199 | 29    |
| H(20A) | 752   | -1893 | 8567 | 31    |
| H(16A) | 6259  | 1422  | 8187 | 32    |
| H(21A) | -1796 | -1374 | 8011 | 36    |
| H(8A)  | 6493  | 3815  | 6602 | 20    |
| H(18A) | 3957  | -1398 | 8914 | 35    |
| H(11A) | 2623  | 4289  | 5588 | 33    |
| H(11B) | 2184  | 4983  | 6108 | 33    |
| H(4AA) | 12085 | 563   | 5333 | 41    |
| H(4AB) | 11172 | -792  | 5348 | 41    |
| H(4AC) | 12285 | -223  | 5875 | 41    |
| H(22A) | -1767 | 332   | 7420 | 31    |
| H(13A) | 4165  | 4626  | 7061 | 22    |
| H(13B) | 2893  | 3593  | 6747 | 22    |
| H(1AA) | 8378  | 2126  | 6648 | 27    |
| H(10A) | 5972  | 4236  | 5439 | 50    |
| H(10B) | 7317  | 5041  | 5847 | 50    |
| H(10C) | 5853  | 5747  | 5440 | 50    |
| H(17A) | 6381  | -126  | 8865 | 48    |
| H(5A)  | 8338  | 230   | 4989 | 23    |
| H(12A) | 3021  | 6203  | 5183 | 67    |
| H(12B) | 2919  | 6963  | 5719 | 67    |
| H(12C) | 1207  | 6300  | 5408 | 67    |
| H(2A)  | 10927 | 1252  | 6419 | 27    |
| H(1)   | 2543  | 4725  | 2714 | 23    |
| H(6)   | 7868  | 3706  | 4809 | 23    |
| H(8)   | 7226  | 6292  | 3411 | 23    |
| H(22)  | -1661 | 2714  | 2648 | 29    |

|        |       |      |      |    |
|--------|-------|------|------|----|
| H(16)  | 5566  | 3944 | 1846 | 33 |
| H(13C) | 3476  | 6136 | 3275 | 26 |
| H(13D) | 4432  | 7233 | 2995 | 26 |
| H(9)   | 6306  | 8182 | 3764 | 26 |
| H(2)   | 11854 | 3708 | 3613 | 27 |
| H(11C) | 3559  | 7549 | 3961 | 35 |
| H(11D) | 4484  | 6718 | 4447 | 35 |
| H(1B)  | 9070  | 4545 | 3352 | 23 |
| H(5)   | 10566 | 2802 | 5036 | 27 |
| H(18)  | 2639  | 1021 | 1174 | 38 |
| H(21)  | -2261 | 1052 | 2046 | 34 |
| H(17)  | 5055  | 2312 | 1226 | 38 |
| H(4A)  | 13443 | 1957 | 4214 | 40 |
| H(4B)  | 13235 | 2060 | 4827 | 40 |
| H(4C)  | 14154 | 3179 | 4549 | 40 |
| H(20)  | -219  | 506  | 1510 | 36 |
| H(10D) | 8141  | 8131 | 4558 | 46 |
| H(10E) | 8907  | 7089 | 4201 | 46 |
| H(10F) | 7781  | 6663 | 4647 | 46 |
| H(12D) | 4874  | 9397 | 4418 | 79 |
| H(12E) | 5468  | 8507 | 4921 | 79 |
| H(12F) | 3434  | 8722 | 4711 | 79 |

---

## DFT Calculations

### Computational Details

All calculations were performed with Gaussian 16, Revision B.01. The M052X density functional and a basis set of 6-31+G\* were used in geometry optimizations. Single-point energies were calculated with M052X and a mixed basis set of 6-311+G\*\*. For bond dissociation energy calculation, all structures have been optimized considering solvent effects using the SMD model for acetonitrile. The reported Gibbs free energies and enthalpies include zero-point vibrational energies and thermal corrections at 298 K.

### Complete Citation for Gaussian 16

Gaussian 16, Revision B.01, Frisch, M. J.; Trucks, G. W.; Schlegel, H. B.; Scuseria, G. E.; Robb, M. A.; Cheeseman, J. R.; Scalmani, G.; Barone, V.; Petersson, G. A.; Nakatsuji, H.; Li, X.; Caricato, M.; Marenich, A. V.; Bloino, J.; Janesko, B. G.; Gomperts, R.; Mennucci, B.; Hratchian, H. P.; Ortiz, J. V.; Izmaylov, A. F.; Sonnenberg, J. L.; Williams-Young, D.; Ding, F.; Lipparini, F.; Egidi, F.; Goings, J.; Peng, B.; Petrone, A.; Henderson, T.; Ranasinghe, D.; Zakrzewski, V. G.; Gao, J.; Rega, N.; Zheng, G.; Liang, W.; Hada, M.; Ehara, M.; Toyota, K.; Fukuda, R.; Hasegawa, J.; Ishida, M.; Nakajima, T.; Honda, Y.; Kitao, O.; Nakai, H.; Vreven, T.; Throssell, K.; Montgomery, Jr., J. A.; Peralta, J. E.; Ogliaro, F.; Bearpark, M. J.; Heyd, J. J.; Brothers, E. N.; Kudin, K. N.; Staroverov, V. N.; Keith, T. A.; Kobayashi, R.; Normand, J.; Raghavachari, K.; Rendell, A. P.; Burant, J. C.; Iyengar, S. S.; Tomasi, J.; Cossi, M.; Millam, J. M.; Klene, M.; Adamo, C.; Cammi, R.; Ochterski, J. W.; Martin, R. L.; Morokuma, K.; Farkas, O.; Foresman, J. B.; Fox, D. J. Gaussian, Inc., Wallingford CT, 2016.

## Data Analysis for DFT Calculation

**Table S15: Calculated BDE (kcal/mol) of Sulfenylating Agents<sup>a</sup>**

|                                                                                                                          |                                                                                   |                                                                                                                                                                                                                        |                                                                                    |                                                                                                                                      |
|--------------------------------------------------------------------------------------------------------------------------|-----------------------------------------------------------------------------------|------------------------------------------------------------------------------------------------------------------------------------------------------------------------------------------------------------------------|------------------------------------------------------------------------------------|--------------------------------------------------------------------------------------------------------------------------------------|
| 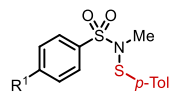                                        |  |                                                                                                                                       |  |                                                   |
| <b>S1</b> , R <sup>1</sup> = OMe, 50.8<br><b>S2</b> , R <sup>1</sup> = Me, 50.8<br><b>S3</b> , R <sup>1</sup> = Cl, 51.2 | <b>S4</b> , 50.6                                                                  | <b>S5</b> , 49.1                                                                                                                                                                                                       | <b>S6</b> , 49.8                                                                   | <b>S7</b> , 55.3                                                                                                                     |
|                                         |  | <b>S9</b> , R <sup>2</sup> = F, 52.2<br><b>S10</b> , R <sup>2</sup> = H, 52.4<br><b>S11</b> , R <sup>2</sup> = Me, 51.9<br><b>S12</b> , R <sup>2</sup> = <i>t</i> -Bu, 52.7<br><b>S13</b> , R <sup>2</sup> = OMe, 51.0 |  |                                                   |
| <b>S8</b> , 43.4                                                                                                         |                                                                                   |                                                                                                                                                                                                                        | <b>S14</b> , R <sup>3</sup> = OMe, 58.4                                            | <b>S15</b> , R <sup>4</sup> = Et, 52.8<br><b>S16</b> , R <sup>4</sup> = <i>i</i> -Pr, 51.8<br><b>S17</b> , R <sup>4</sup> = Bn, 53.2 |
|                                         |  |                                                                                                                                       |  |                                                                                                                                      |
| <b>S18</b> , 39.8                                                                                                        | <b>S19</b> , 53.7                                                                 | <b>S20</b> , 73.6                                                                                                                                                                                                      | <b>S21</b> , 79.2                                                                  |                                                                                                                                      |

<sup>a</sup>Solution phase BDE (kcal/mol) calculated at SMD(acetonitrile)/M05-2X/6-311+G(d,p), SMD(acetonitrile)/M05-2X/6-31+G(d) level of theory.<sup>8</sup>







|   |             |             |             |
|---|-------------|-------------|-------------|
| S | 0.62557200  | -0.00002800 | 1.67842700  |
| C | -0.93900800 | -0.00001600 | 0.82156300  |
| C | -1.55639200 | 1.21058100  | 0.49802700  |
| C | -1.55637200 | -1.21060900 | 0.49796500  |
| C | -2.78286300 | 1.20354800  | -0.16100200 |
| H | -1.07704500 | 2.14745000  | 0.75501100  |
| C | -2.78284200 | -1.20356200 | -0.16106300 |
| H | -1.07700400 | -2.14748000 | 0.75489900  |
| C | -3.41250400 | -0.00000300 | -0.49782000 |
| H | -3.25799600 | 2.14414200  | -0.41692800 |
| H | -3.25796200 | -2.14414900 | -0.41703700 |
| C | -4.75185800 | 0.00000000  | -1.18607800 |
| H | -5.55907300 | 0.00000600  | -0.44767200 |
| H | -4.87166600 | 0.88751100  | -1.80939800 |
| H | -4.87167100 | -0.88751300 | -1.80939300 |

#### N6

SCF energy [M05-2X]/6-311+G\*\*/SMD (acetonitrile): -761.7852733 a.u.  
Thermal correction to Gibbs free energy at 298 K: 0.111984 a.u.  
Gibbs free energy at 298 K [M05-2X]/6-311+G\*\*/SMD (acetonitril): -761.6732893 a.u.

0 2

|   |             |             |             |
|---|-------------|-------------|-------------|
| S | 0.25507400  | -0.35819700 | 0.08961000  |
| O | 0.35131800  | -0.18972000 | 1.54681900  |
| O | 0.49851200  | -1.69716600 | -0.47045700 |
| N | 1.35594200  | 0.67813300  | -0.67205400 |
| C | 2.69285500  | 0.52820600  | -0.14648800 |
| H | 2.95432300  | -0.51236800 | 0.06924900  |
| H | 2.75978900  | 1.09328500  | 0.79262000  |
| H | 3.39178700  | 0.95769900  | -0.86067900 |
| C | -1.31219400 | 0.28232800  | -0.50600500 |
| H | -1.18933700 | 0.28881700  | -1.59136900 |
| C | -2.41393400 | -0.68802600 | -0.09041300 |
| H | -2.49770300 | -0.73954000 | 0.99726800  |
| H | -3.35868500 | -0.31306300 | -0.48757300 |
| H | -2.24538100 | -1.68898400 | -0.48800200 |
| C | -1.53008600 | 1.69030100  | 0.03385600  |
| H | -0.70670400 | 2.35992600  | -0.22010900 |
| H | -2.44316700 | 2.08599100  | -0.41475500 |
| H | -1.65618200 | 1.67069000  | 1.11738400  |

#### N8

SCF energy [M05-2X]/6-311+G\*\*/SMD (acetonitrile): -439.6814539 a.u.  
Thermal correction to Gibbs free energy at 298 K: 0.106526 a.u.  
Gibbs free energy at 298 K [M05-2X]/6-311+G\*\*/SMD (acetonitril): -439.5749279 a.u.

0 2

|   |             |             |             |
|---|-------------|-------------|-------------|
| N | -1.01828600 | -0.87294000 | -0.14507800 |
| C | -2.12083600 | -0.02486200 | -0.19636100 |
| O | -2.32556100 | 0.70722800  | -1.15335700 |
| C | 0.22433200  | -0.39142200 | -0.05901800 |
| C | 1.30181200  | -1.32684500 | -0.15009400 |
| C | 0.53727400  | 0.99106800  | 0.14523800  |
| C | 2.61070500  | -0.90152400 | -0.05678700 |
| H | 1.05582600  | -2.37088200 | -0.29805500 |
| C | 1.85319000  | 1.39465300  | 0.23936500  |
| H | -0.26338700 | 1.71460700  | 0.22726000  |
| C | 2.89531700  | 0.45899200  | 0.13667400  |
| H | 3.41967200  | -1.61728600 | -0.13210700 |
| H | 2.08432200  | 2.44088100  | 0.39592700  |
| H | 3.92323400  | 0.78955800  | 0.21110700  |
| C | -3.06963400 | -0.17397600 | 0.95817100  |

|   |             |             |            |
|---|-------------|-------------|------------|
| H | -3.43538300 | -1.20238100 | 0.99885900 |
| H | -2.54084800 | 0.02625500  | 1.89357800 |
| H | -3.90389900 | 0.51549700  | 0.84274400 |

#### N11

SCF energy [M05-2X]/6-311+G\*\*/SMD (acetonitrile): -478.9844197 a.u.  
Thermal correction to Gibbs free energy at 298 K: 0.133837 a.u.  
Gibbs free energy at 298 K [M05-2X]/6-311+G\*\*/SMD (acetonitril): -478.8505827 a.u.

0 2

|   |             |             |             |
|---|-------------|-------------|-------------|
| C | 0.54083700  | 1.28942900  | 0.06433100  |
| C | 1.91739300  | 1.13667900  | 0.13867000  |
| C | 2.50755400  | -0.13289400 | 0.04615700  |
| C | 1.67783000  | -1.24499900 | -0.12178500 |
| C | 0.29459700  | -1.10212300 | -0.19691000 |
| C | -0.28133400 | 0.16863500  | -0.10755100 |
| H | 0.09143200  | 2.27182900  | 0.14014900  |
| H | 2.54962500  | 2.00799200  | 0.27153900  |
| H | 2.11894900  | -2.23214800 | -0.20006400 |
| H | -0.33230800 | -1.97325600 | -0.33850100 |
| N | -2.51626700 | -0.79382800 | -0.21370600 |
| C | -3.79449600 | -0.72760400 | 0.43926200  |
| H | -4.53377500 | -0.41562400 | -0.31120900 |
| H | -4.07617800 | -1.73120000 | 0.75920700  |
| H | -3.82646400 | -0.02199100 | 1.27142200  |
| C | -1.75047900 | 0.36394200  | -0.16916000 |
| O | -2.27874600 | 1.47037300  | -0.23957000 |
| C | 4.00267200  | -0.28063800 | 0.13176500  |
| H | 4.49686400  | 0.36593100  | -0.59718900 |
| H | 4.36101400  | 0.01077600  | 1.12262600  |
| H | 4.30723200  | -1.31105700 | -0.05415800 |

#### N12

SCF energy [M05-2X]/6-311+G\*\*/SMD (acetonitrile): -596.9398151 a.u.  
Thermal correction to Gibbs free energy at 298 K: 0.215538 a.u.  
Gibbs free energy at 298 K [M05-2X]/6-311+G\*\*/SMD (acetonitril): -596.7242771 a.u.

0 2

|   |             |             |             |
|---|-------------|-------------|-------------|
| C | 0.58329200  | -1.33338500 | 0.04337300  |
| C | -0.79729400 | -1.21975100 | 0.09897800  |
| C | -1.43476100 | 0.02936900  | -0.01211400 |
| C | -0.62755600 | 1.16005700  | -0.17794700 |
| C | 0.76151600  | 1.05597400  | -0.23349600 |
| C | 1.37681400  | -0.19262000 | -0.12686900 |
| H | 1.05726900  | -2.30291400 | 0.13440700  |
| H | -1.38785400 | -2.11808300 | 0.23308300  |
| H | -1.07180200 | 2.14149800  | -0.27147400 |
| H | 1.36036300  | 1.94692200  | -0.37351300 |
| N | 3.58380700  | 0.83534200  | -0.20023800 |
| C | 4.85443000  | 0.80437200  | 0.46988600  |
| H | 5.60895800  | 0.49497400  | -0.26643500 |
| H | 5.11266700  | 1.81733500  | 0.77923600  |
| H | 4.88928000  | 0.11076800  | 1.31201400  |
| C | 2.85176600  | -0.34462300 | -0.16597700 |
| O | 3.41280500  | -1.43536000 | -0.22587800 |
| C | -2.95939800 | 0.10471400  | 0.04877100  |
| C | -3.47731700 | 1.53813000  | -0.09713500 |
| H | -3.11227200 | 2.18508900  | 0.70493700  |
| H | -3.18832700 | 1.97601200  | -1.05623800 |
| H | -4.56927600 | 1.52748400  | -0.04891600 |
| C | -3.55819000 | -0.74208000 | -1.08713300 |
| H | -3.27462500 | -1.79327700 | -1.00204800 |
| H | -4.64991700 | -0.68321100 | -1.04986000 |



H -3.22823900 -0.37486100 -2.06279600  
C -3.44270500 -0.44973200 1.40007700  
H -4.53443900 -0.39798500 1.44565600  
H -3.14829500 -1.49241500 1.53872500  
H -3.03617000 0.13559600 2.22942900

#### N14

SCF energy [M05-2X]/6-311+G\*\*/SMD (acetonitrile): -668.7436483 a.u.

Thermal correction to Gibbs free energy at 298 K: 0.168988 a.u.  
Gibbs free energy at 298 K [M05-2X]/6-311+G\*\*/SMD (acetonitril): -668.5746603 a.u.

0 2

C 0.65557200 1.07901600 0.05573700  
C 0.08101900 2.34980600 -0.01031800  
C -1.30635200 2.44440400 -0.07860800  
C -2.12852100 1.32121300 -0.08270100  
C -1.54426100 0.05204800 -0.01065900  
C -0.14686700 -0.07240200 0.06489900  
H 0.68703500 3.24404300 -0.00571500  
H -3.19988300 1.44095600 -0.14768500  
N 1.47852500 -1.66407000 -0.79986000  
C 2.71510500 -2.24291900 -0.34888600  
H 3.05435800 -2.98963800 -1.06663300  
H 3.46329900 -1.44007600 -0.32731400  
H 2.63092900 -2.67110900 0.65264400  
C 0.51110400 -1.40655900 0.16181800  
O 0.18573300 -2.27129300 0.96374400  
H -1.76215500 3.42585000 -0.13175300  
O 1.98946500 0.85542700 0.14562700  
O -2.25059600 -1.09824700 -0.04431600  
C 2.86346800 1.98704000 0.12540300  
H 3.86909300 1.58056300 0.19252600  
H 2.75002400 2.54327200 -0.80628000  
H 2.66986400 2.63559500 0.98104100  
C -3.67200800 -1.00856100 -0.15972700  
H -4.09729000 -0.48368200 0.69727600  
H -3.95414100 -0.50759200 -1.08749900  
H -4.02718500 -2.03530000 -0.17376000

#### N15

SCF energy [M05-2X]/6-311+G\*\*/SMD (acetonitrile): -478.9837656 a.u.

Thermal correction to Gibbs free energy at 298 K: 0.133678 a.u.  
Gibbs free energy at 298 K [M05-2X]/6-311+G\*\*/SMD (acetonitril): -478.8500876 a.u.

0 2

C 1.72040400 1.14580700 0.08526000  
C 3.02701800 0.68501100 0.20294600  
C 3.29311300 -0.68401800 0.12655300  
C 2.25253900 -1.59232900 -0.06670900  
C 0.94240100 -1.13521900 -0.18742900  
C 0.67635100 0.23600600 -0.11171700  
H 1.49834100 2.20381200 0.14586200  
H 3.83667100 1.38827600 0.35417300  
H 2.46091600 -2.65338500 -0.12739400  
H 0.13411200 -1.83805400 -0.34670300  
N -1.71409200 -0.18637000 -0.39430300  
C -2.81401500 -0.13776900 0.53795500  
H -2.46261700 -0.59366400 1.47546200  
H -3.03443000 0.91097200 0.76942900  
C -0.71286200 0.75971800 -0.21129700  
O -0.97904100 1.95609900 -0.20704900  
H 4.31176900 -1.04161600 0.21726800  
C -4.03363700 -0.87079500 0.00729800

H -3.79353500 -1.91450000 -0.20407500  
H -4.83642900 -0.84261200 0.74660200  
H -4.39169600 -0.40190100 -0.91126400

#### N16

SCF energy [M05-2X]/6-311+G\*\*/SMD (acetonitrile): -518.3026912 a.u.

Thermal correction to Gibbs free energy at 298 K: 0.162384 a.u.  
Gibbs free energy at 298 K [M05-2X]/6-311+G\*\*/SMD (acetonitril): -518.1403072 a.u.

0 2

C 1.73797100 1.20237100 0.32864500  
C 3.05552100 0.80746700 0.53381700  
C 3.46131000 -0.48026000 0.17664900  
C 2.55005500 -1.37332300 -0.38685200  
C 1.22988200 -0.98169700 -0.59492100  
C 0.82341100 0.30767900 -0.23585400  
H 1.40776100 2.19607800 0.60398400  
H 3.76510700 1.49886500 0.97145800  
H 2.86665500 -2.37053200 -0.66637500  
H 0.52395400 -1.67263600 -1.04041100  
N -1.46162400 -0.18007800 -0.96025600  
C -2.47815100 -0.76771000 -0.09586900  
H -2.82477200 -1.66332600 -0.61297200  
C -0.58749400 0.75283900 -0.41734300  
O -0.95999400 1.89602000 -0.18261000  
H 4.48827300 -0.78617100 0.33695600  
C -3.66104300 0.21306300 -0.00210100  
H -4.00798300 0.50475900 -0.99456700  
H -4.47676100 -0.28795600 0.52316200  
H -3.37606500 1.10735900 0.55229200  
C -1.95578300 -1.13695100 1.29133100  
H -1.63677200 -0.24537700 1.83829600  
H -2.75581200 -1.61752100 1.85832800  
H -1.11633900 -1.83202500 1.22750700

#### N17

SCF energy [M05-2X]/6-311+G\*\*/SMD (acetonitrile): -670.7581486 a.u.

Thermal correction to Gibbs free energy at 298 K: 0.181717 a.u.  
Gibbs free energy at 298 K [M05-2X]/6-311+G\*\*/SMD (acetonitril): -670.5764316 a.u.

0 2

C 3.59527800 0.87592200 0.17134100  
C 4.77565800 0.14351000 0.11588800  
C 4.73607800 -1.22069400 -0.18137700  
C 3.51664600 -1.85261700 -0.42388000  
C 2.33144100 -1.12295900 -0.37124100  
C 2.37185500 0.24357900 -0.07412600  
H 3.60970700 1.93295300 0.40524500  
H 5.72388500 0.63156400 0.30463900  
H 3.48852800 -2.90998400 -0.65650600  
H 1.38414000 -1.60969900 -0.56744000  
N -0.06563200 0.36238600 -0.18833100  
C -1.05979000 0.51652600 0.84410600  
H -0.75333800 -0.09206600 1.70641700  
C 1.12691700 1.05104700 0.01741600  
O 1.12201400 2.26284600 0.19454600  
H 5.65679600 -1.79006000 -0.22481300  
H -1.04478300 1.56074200 1.18452400  
C -2.43646000 0.11760000 0.37718100  
C -2.96551900 0.67076900 -0.79318900  
C -3.20364400 -0.78689300 1.11200000

|   |             |             |             |
|---|-------------|-------------|-------------|
| C | -4.24349500 | 0.32120500  | -1.22272700 |
| H | -2.37352300 | 1.37572900  | -1.36748500 |
| C | -4.48599600 | -1.13598000 | 0.68537100  |
| H | -2.79655000 | -1.22205200 | 2.01824300  |
| C | -5.00774800 | -0.58349200 | -0.48286000 |
| H | -4.64467400 | 0.75488100  | -2.13106500 |
| H | -5.07203100 | -1.84109400 | 1.26286300  |
| H | -6.00216500 | -0.85552000 | -0.81607900 |

**N20**

SCF energy [M05-2X]/6-311+G\*\*/SMD (acetonitrile): -360.0374169 a.u.

Thermal correction to Gibbs free energy at 298 K: 0.048217 a.u.

Gibbs free energy at 298 K [M05-2X]/6-311+G\*\*/SMD (acetonitril)]: -359.9891999 a.u.

0 2

|   |             |             |             |
|---|-------------|-------------|-------------|
| C | -0.76440700 | 1.23533900  | -0.00003900 |
| C | 0.76442500  | 1.23533900  | 0.00006900  |
| H | -1.19827600 | 1.70617000  | 0.88305600  |
| H | -1.19817500 | 1.70608000  | -0.88323300 |
| H | 1.19817200  | 1.70606400  | 0.88328600  |
| H | 1.19832700  | 1.70616300  | -0.88301100 |
| C | -1.13322400 | -0.23129600 | 0.00001700  |
| C | 1.13322900  | -0.23129900 | 0.00004000  |
| O | -2.25282200 | -0.70848600 | -0.00013700 |
| O | 2.25280700  | -0.70850400 | -0.00019100 |
| N | -0.00001100 | -1.07672100 | 0.00028600  |

## References

1. J. A., Gurak Jr., K. S. Yang, Z. Liu and K. M. Engle, *J. Am. Chem. Soc.* 2016, **138**, 5805–5808
2. X. Wang, Z.-Q. Li, B. K. Mai, J. A., Gurak Jr., J. E. Xu, V. T. Tran, H.-Q. Ni, Z. Liu, Z. Liu, K. S. Yang, R. Xiang, P. Liu and K. M. Engle, *Chem. Sci.* 2020, **11**, 11307–11314.
3. D. N. Harpp, B. T. Friedlander and R. A. Smith, *Synthesis* 1979, 181–182.
4. R. H. Li, Y. Zhou, K. Y. Yoon, Z. Dong and G. B. Dong, *Nat. Commun.* 2019, **10**, 8.
5. N. Kim, V. T. Tran, O. Apolinar, S. R. Wisniewski, M. D. Eastgate and K. M. Engle, *Synlett* 2021, **32**, 1570–1754.
6. V. T. Tran, N. Kim, C. Z. Rubel, X. Wu, T. Kang, T. C. Jankins, Z.-Q. Li, M. V. Joannou, S. Ayers, M. Gembicky, J. Bailey, E. J. Sturgell, B. B. Sanchez, J. S. Chen, S. Lin, M. D. Eastgate, S. R. Wisniewski and K. M. Engle, *ChemRxiv* 2022, DOI: 10.26434/chemrxiv-2022-7zjvh.
7. CCDC 2149662 (**S10**) and 2154909 (**4a**) contain the supplementary crystallographic data for this paper. These data can be obtained free of charge from The Cambridge Crystallographic Data Centre via [www.ccdc.cam.ac.uk/data\\_request/cif](http://www.ccdc.cam.ac.uk/data_request/cif).
8. Z.-Q. Li, Y. Cao, T. Kang and K. M. Engle, *ChemRxiv* **2021**, DOI: 10.26434/chemrxiv-2021-bj205.

# NMR Spectra

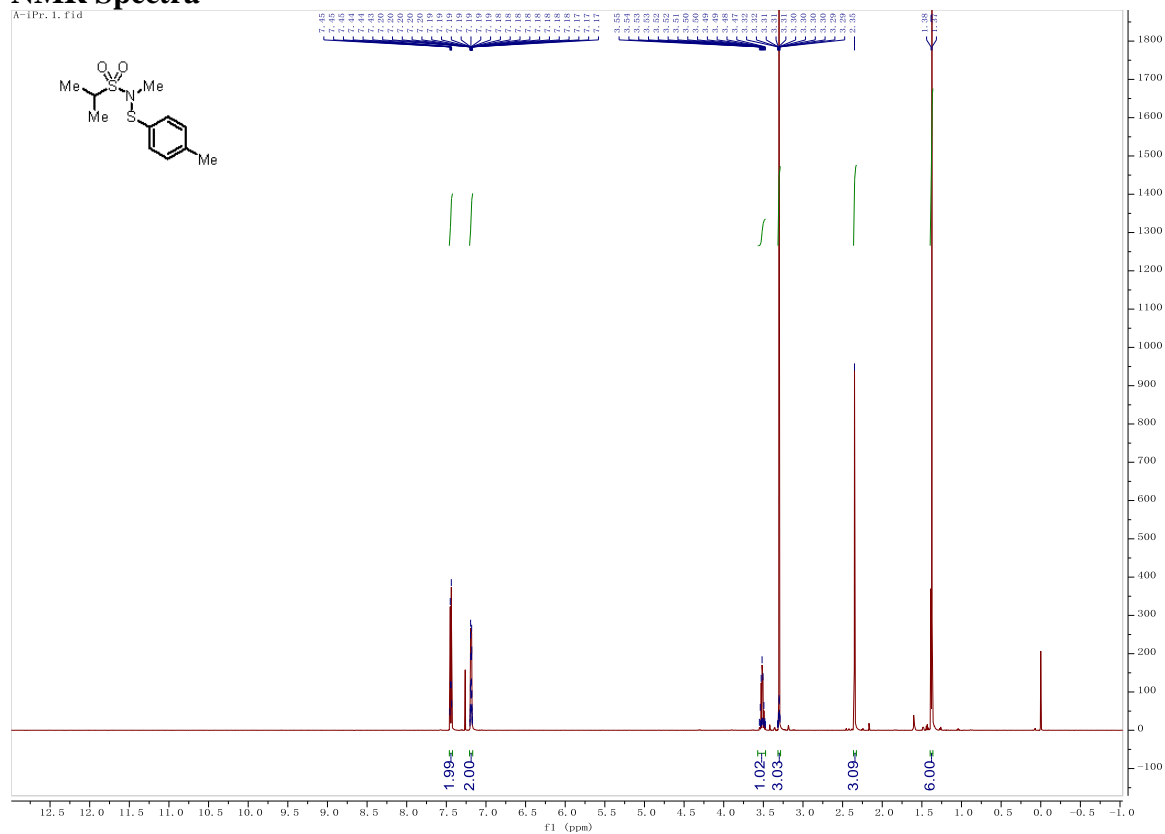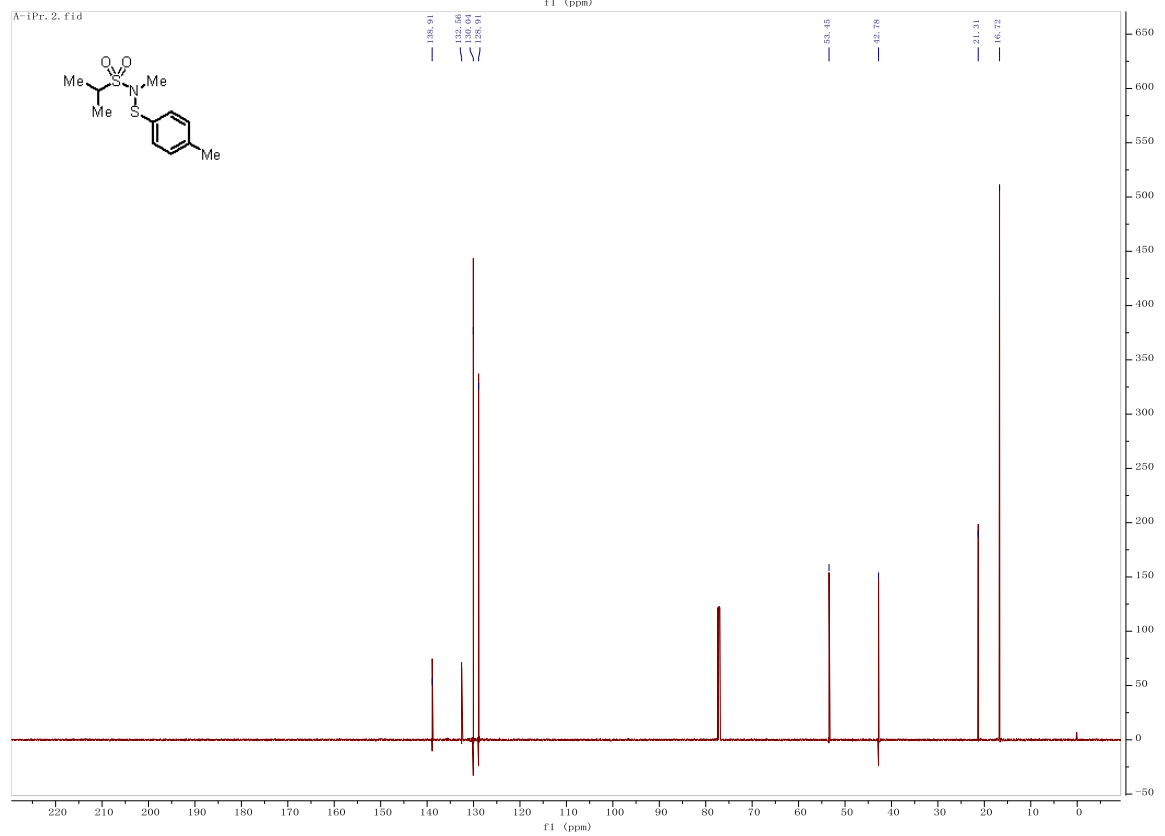

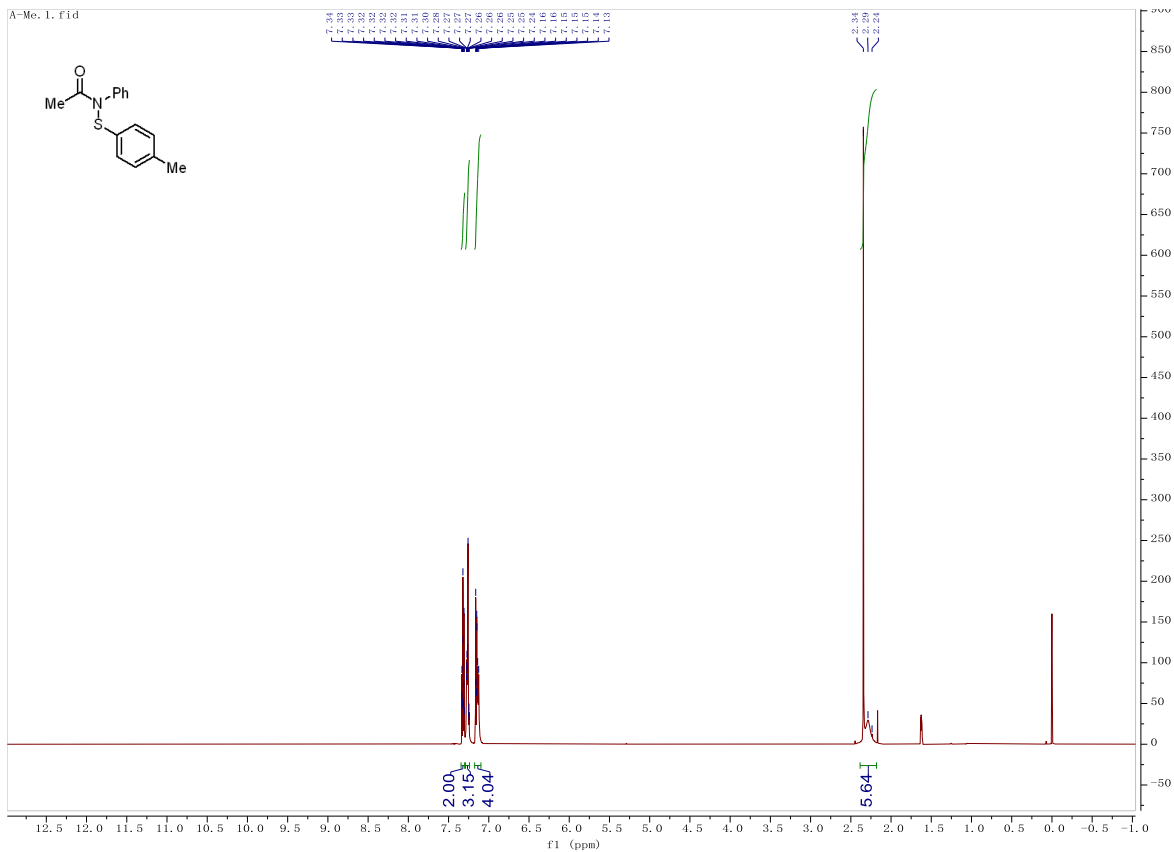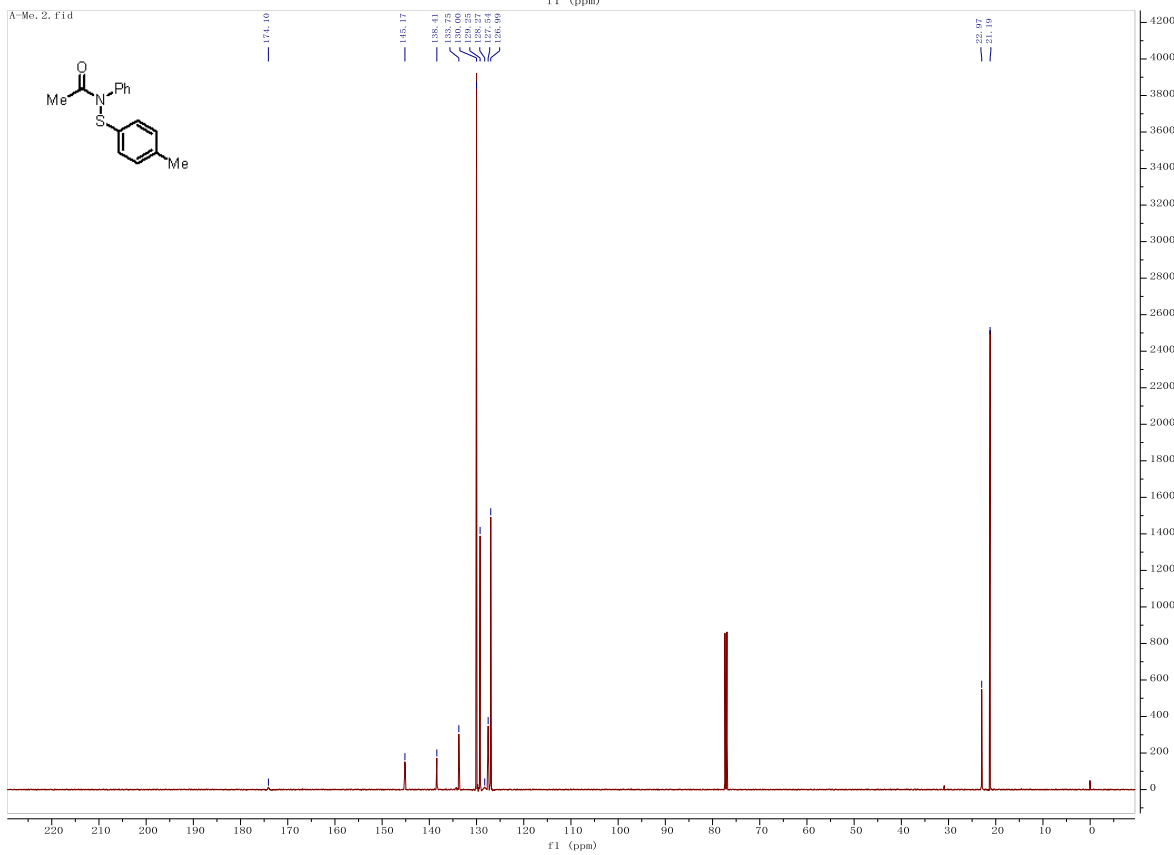

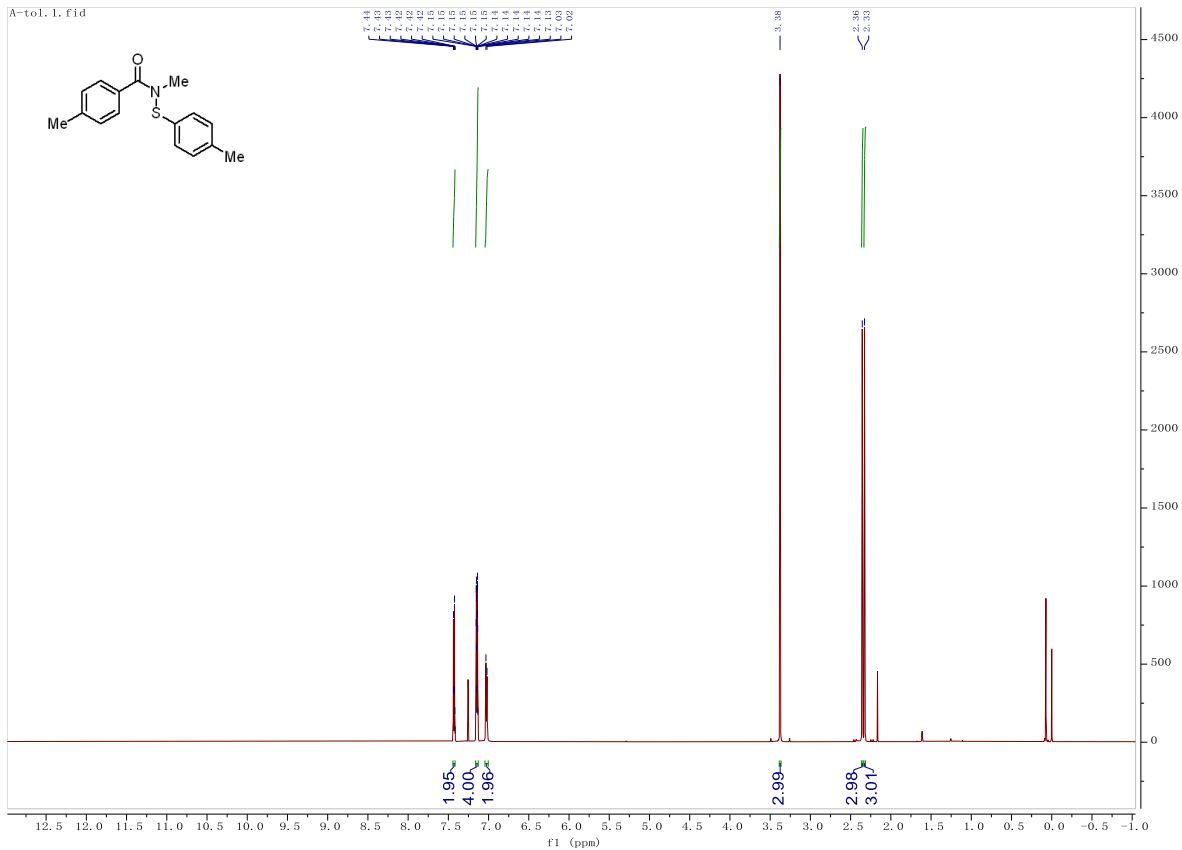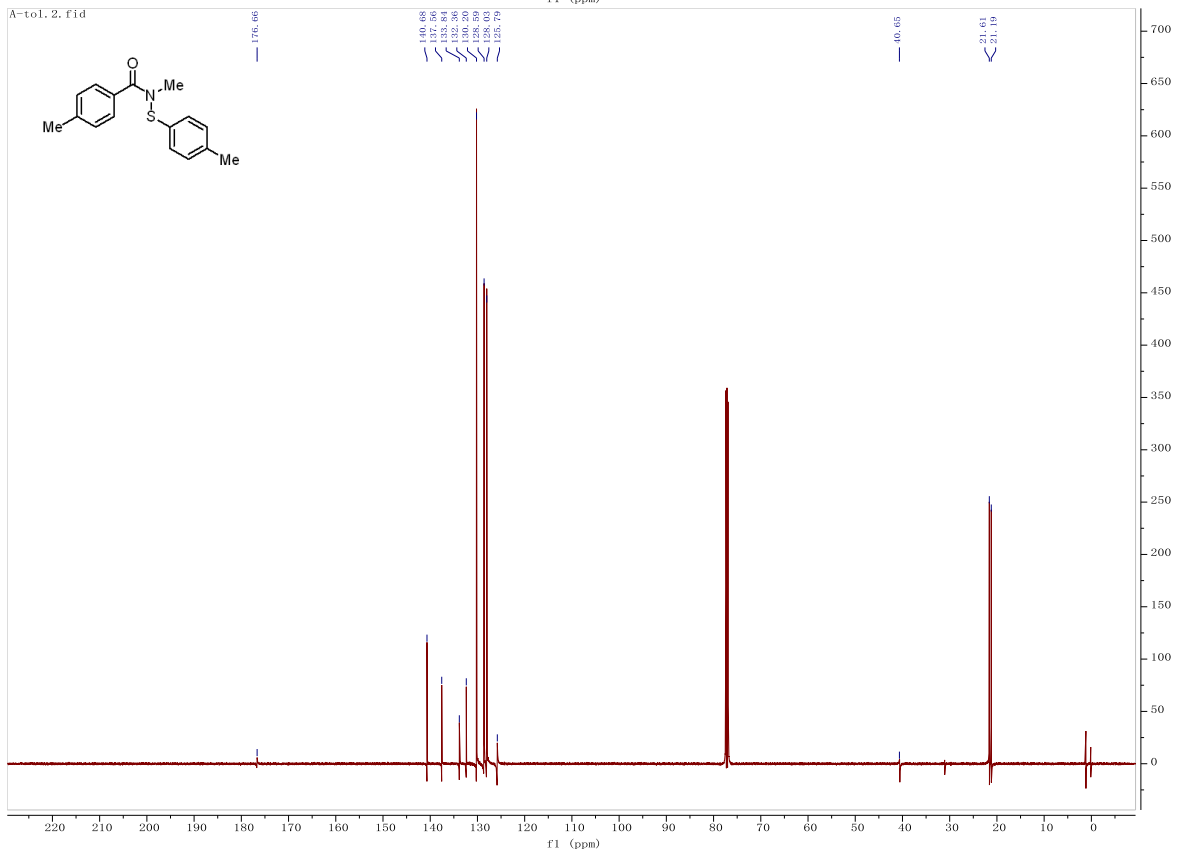

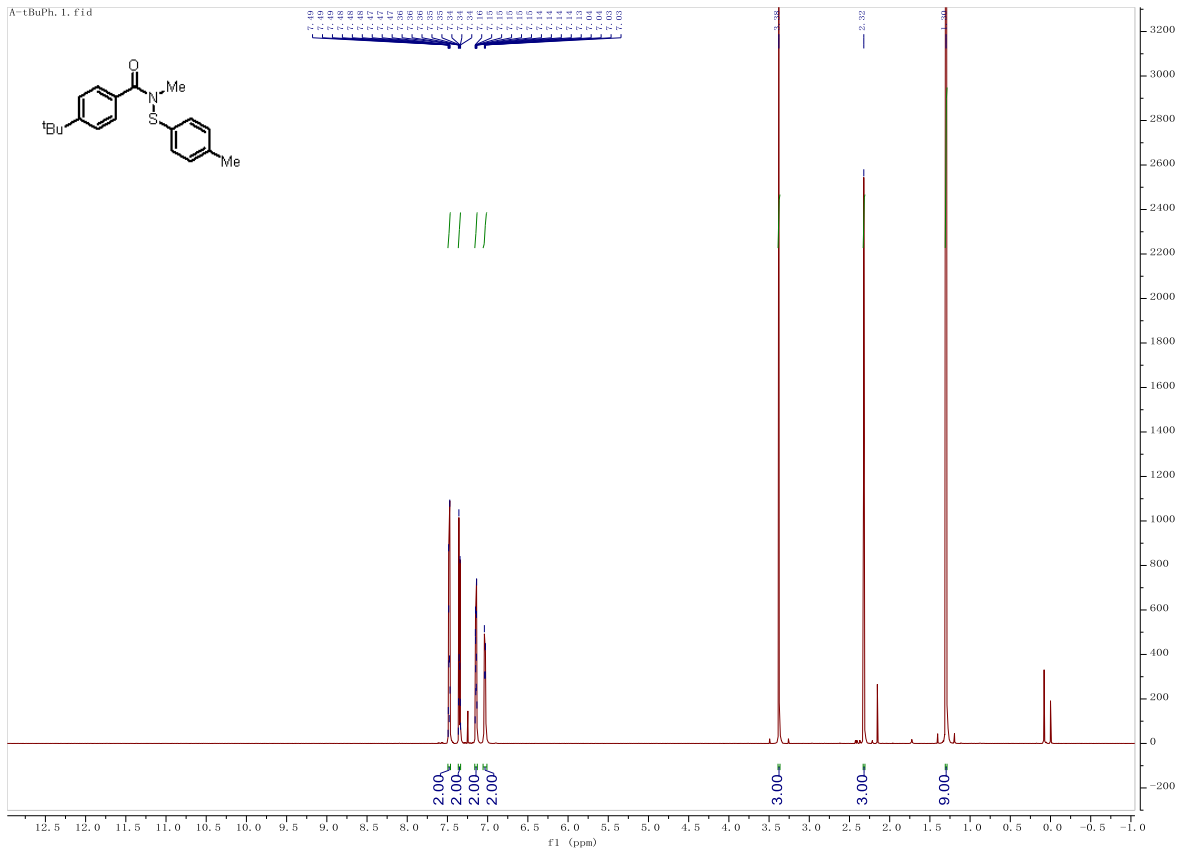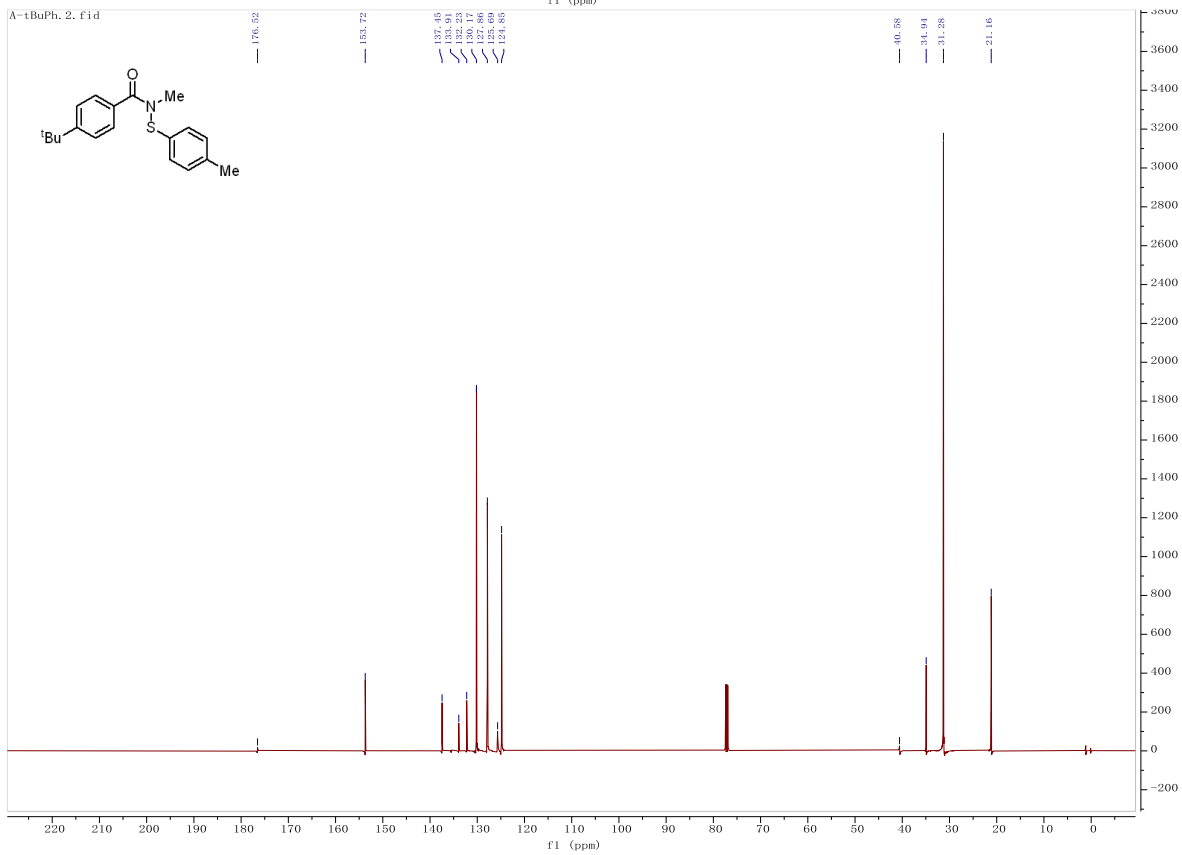

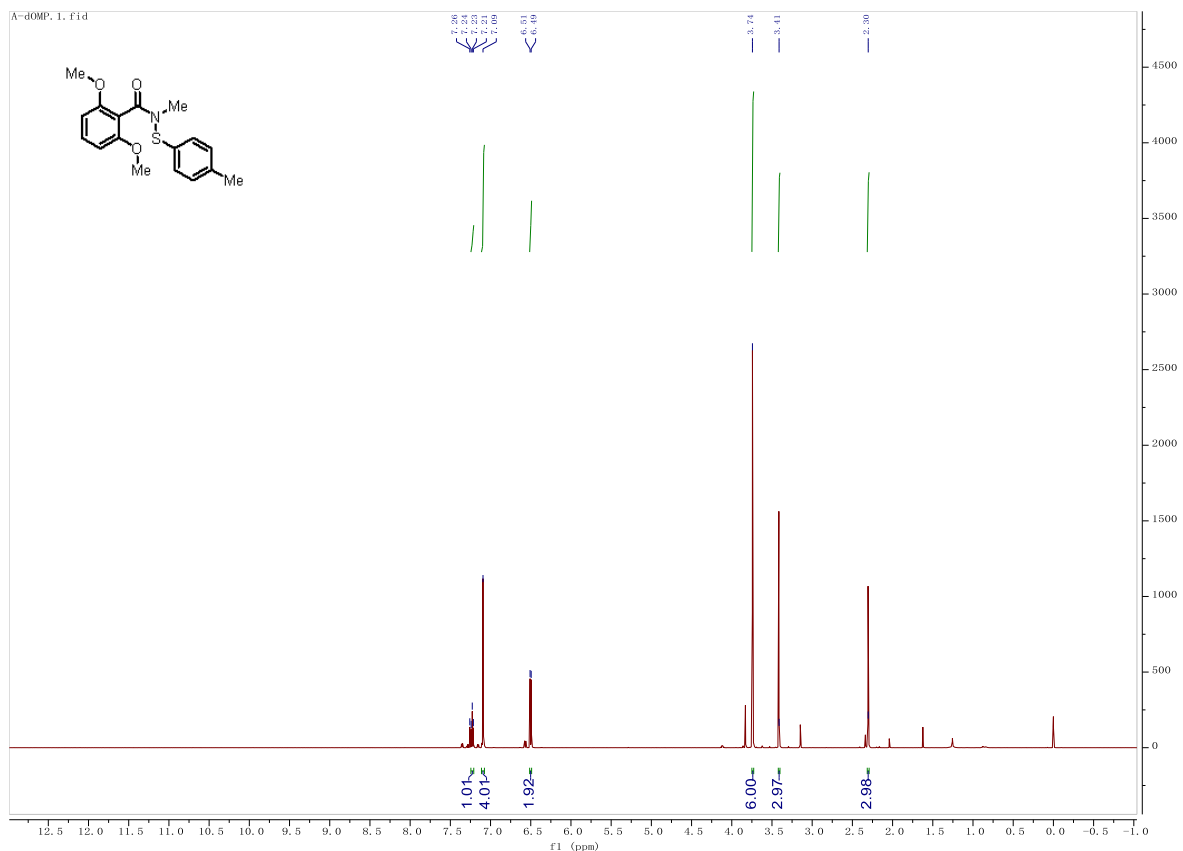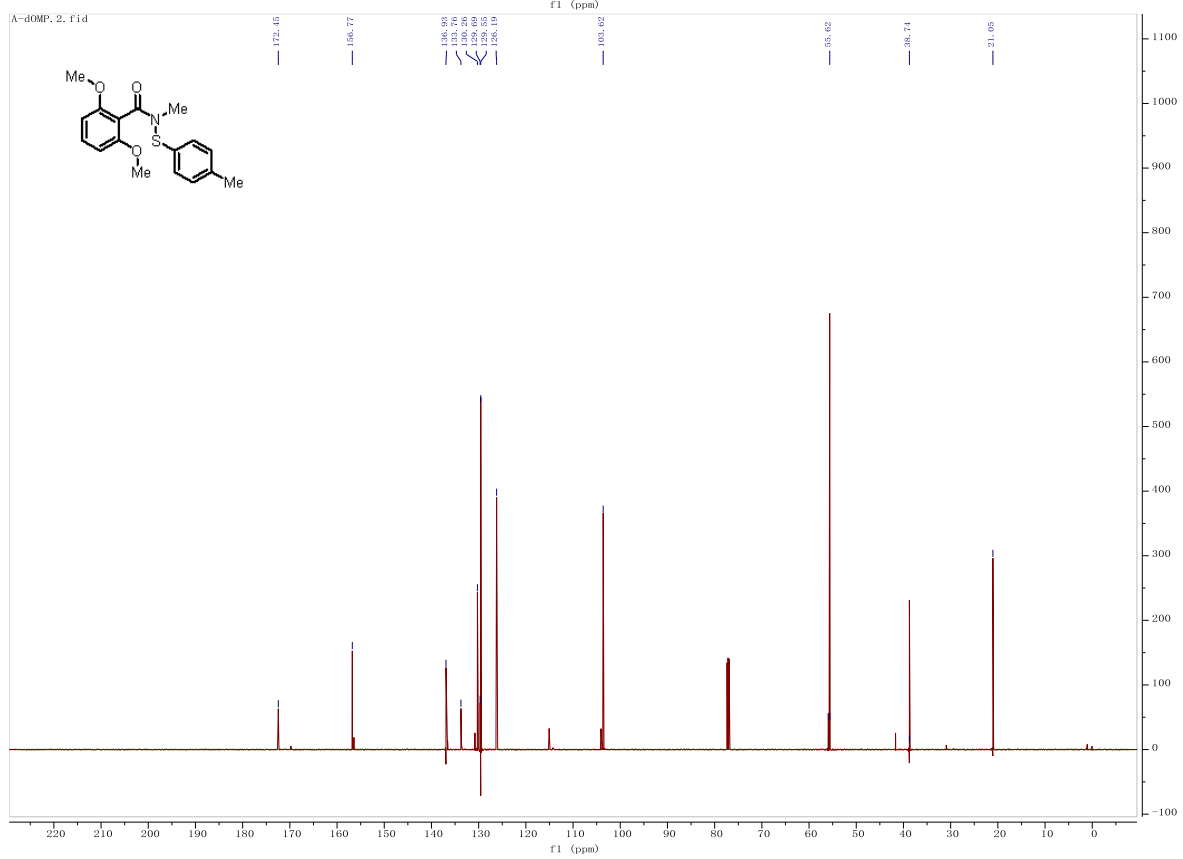



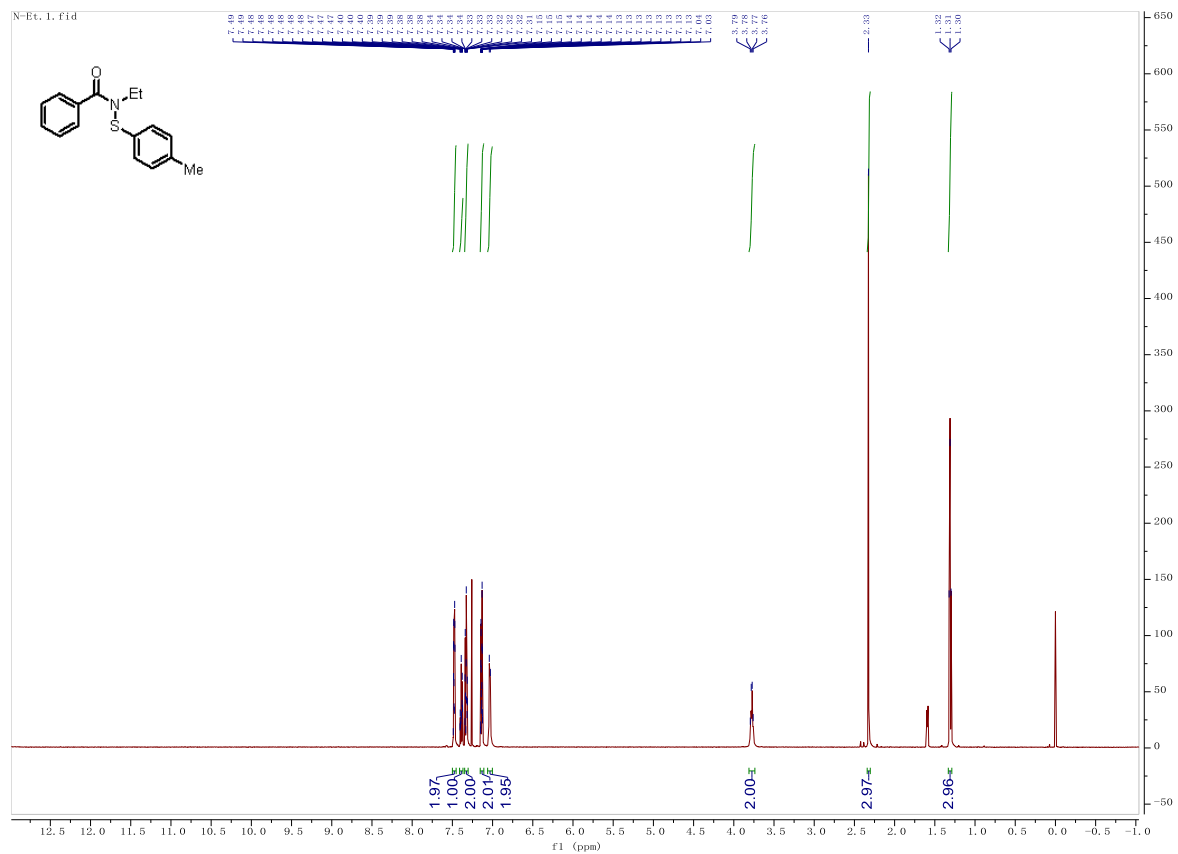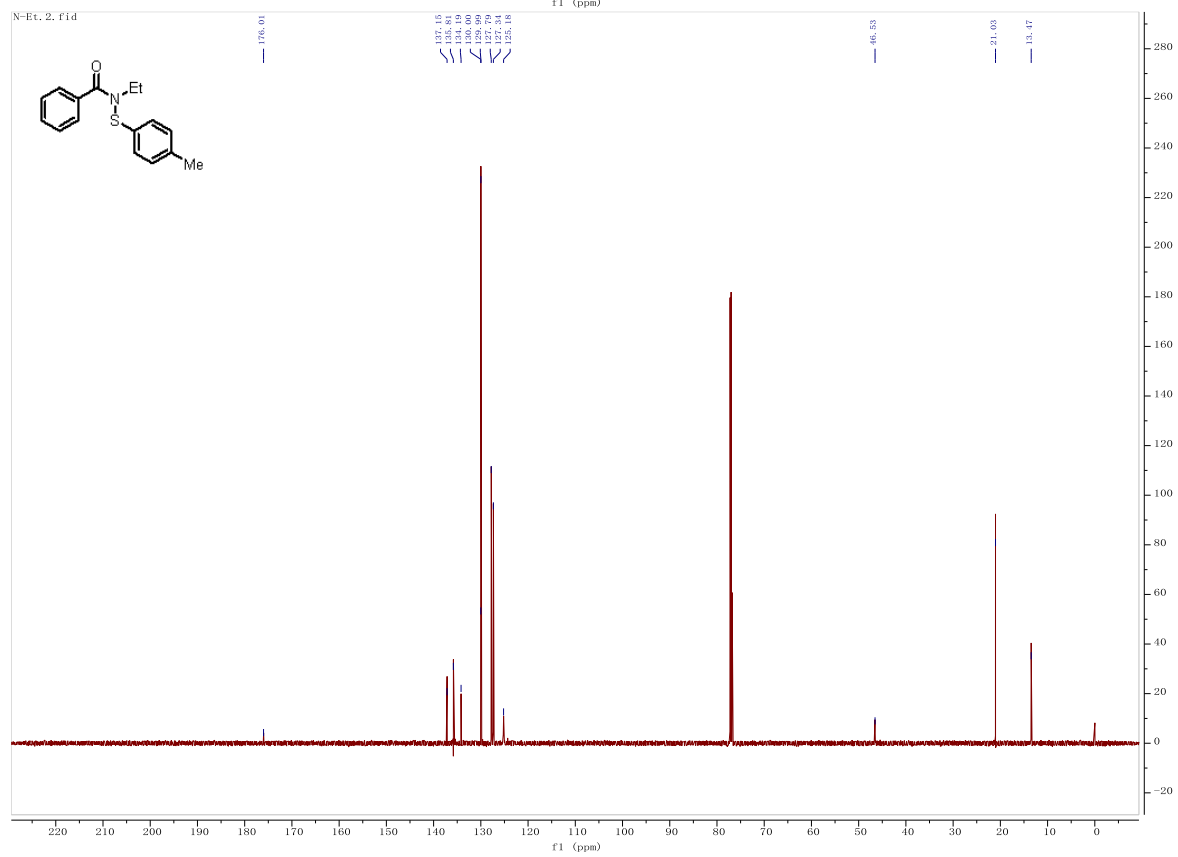

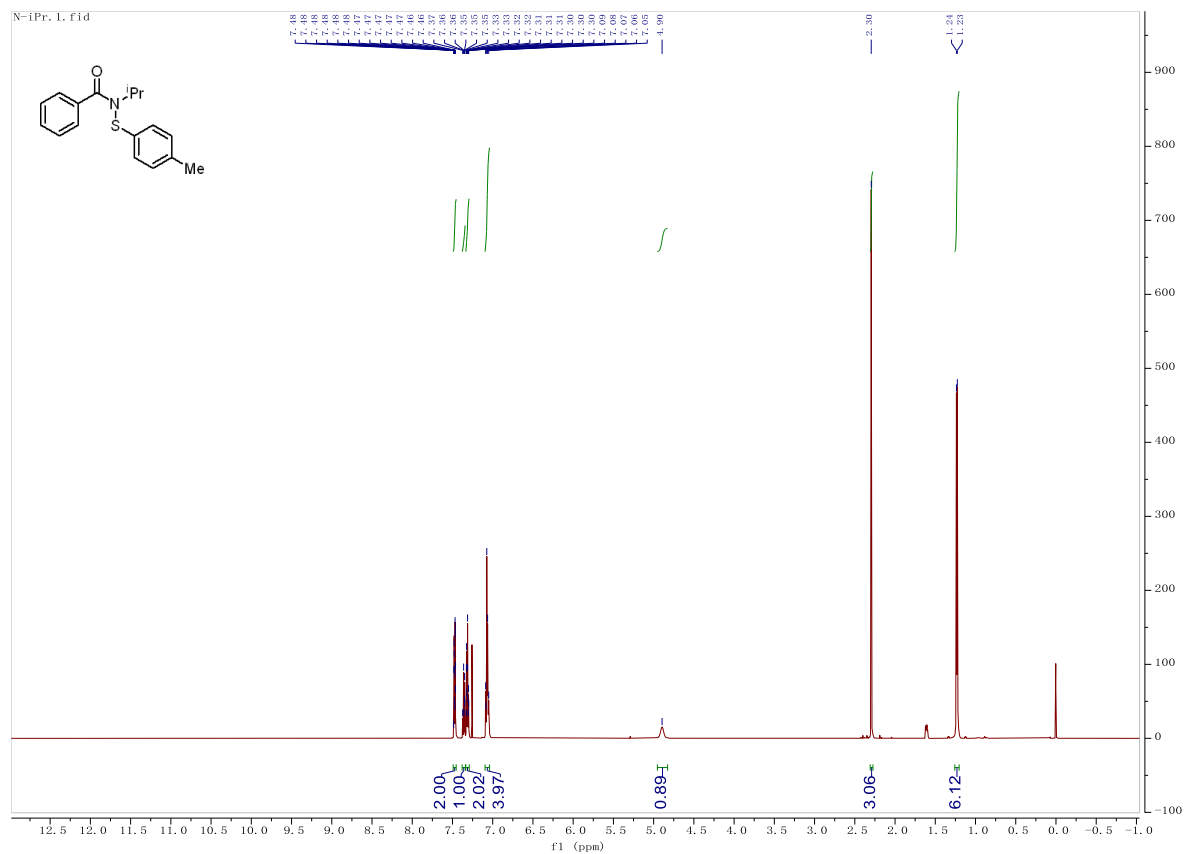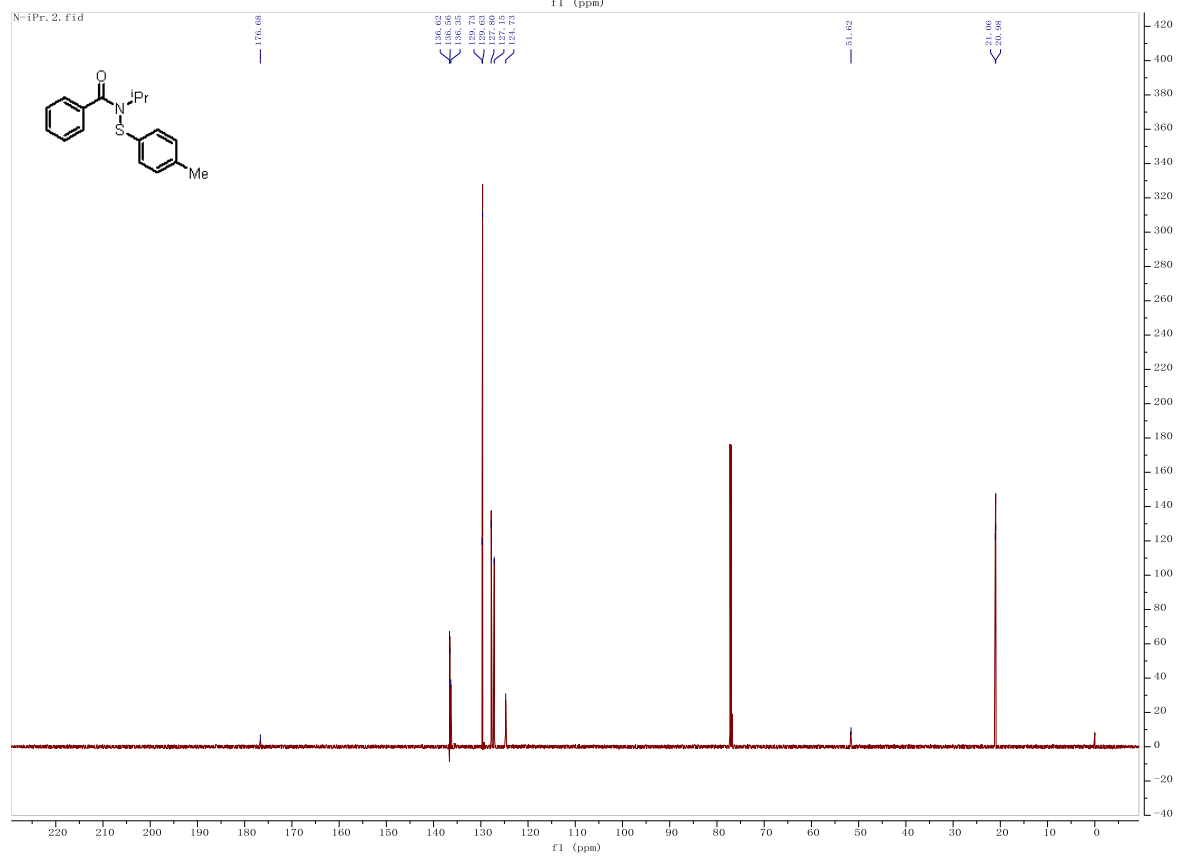

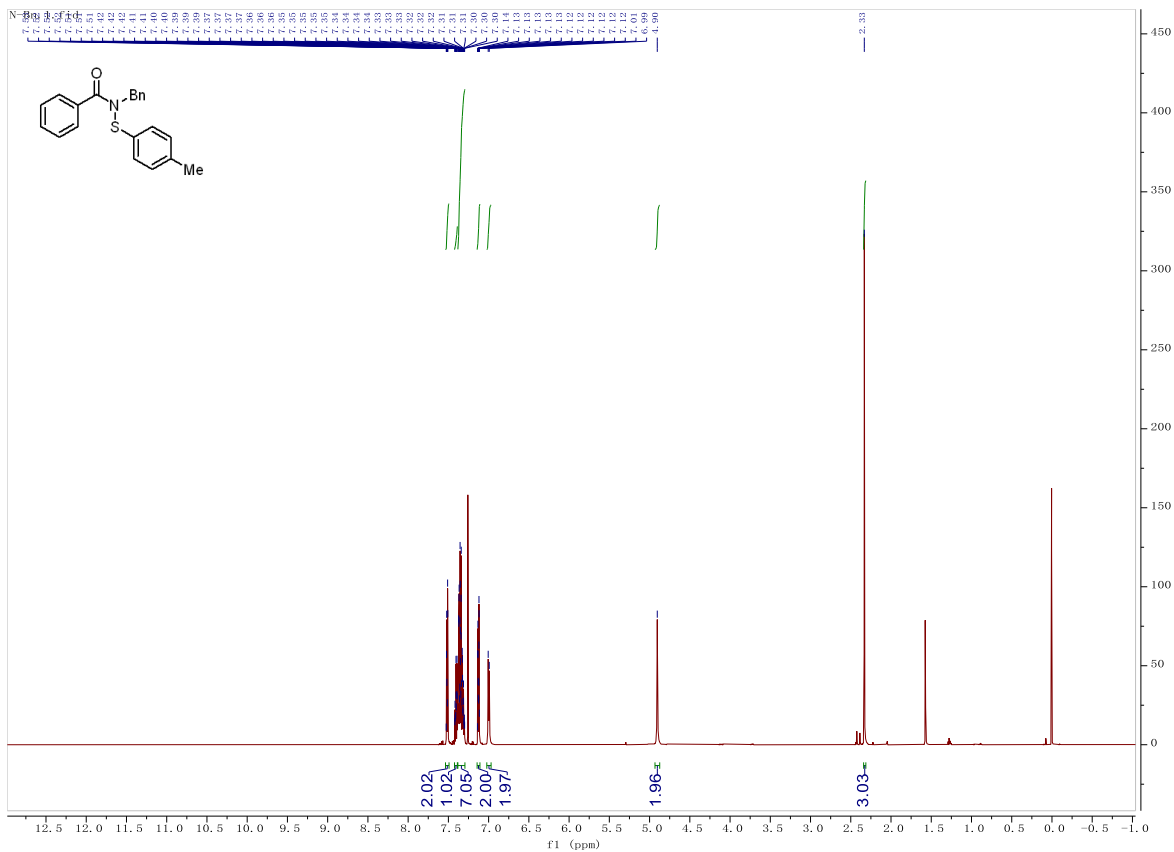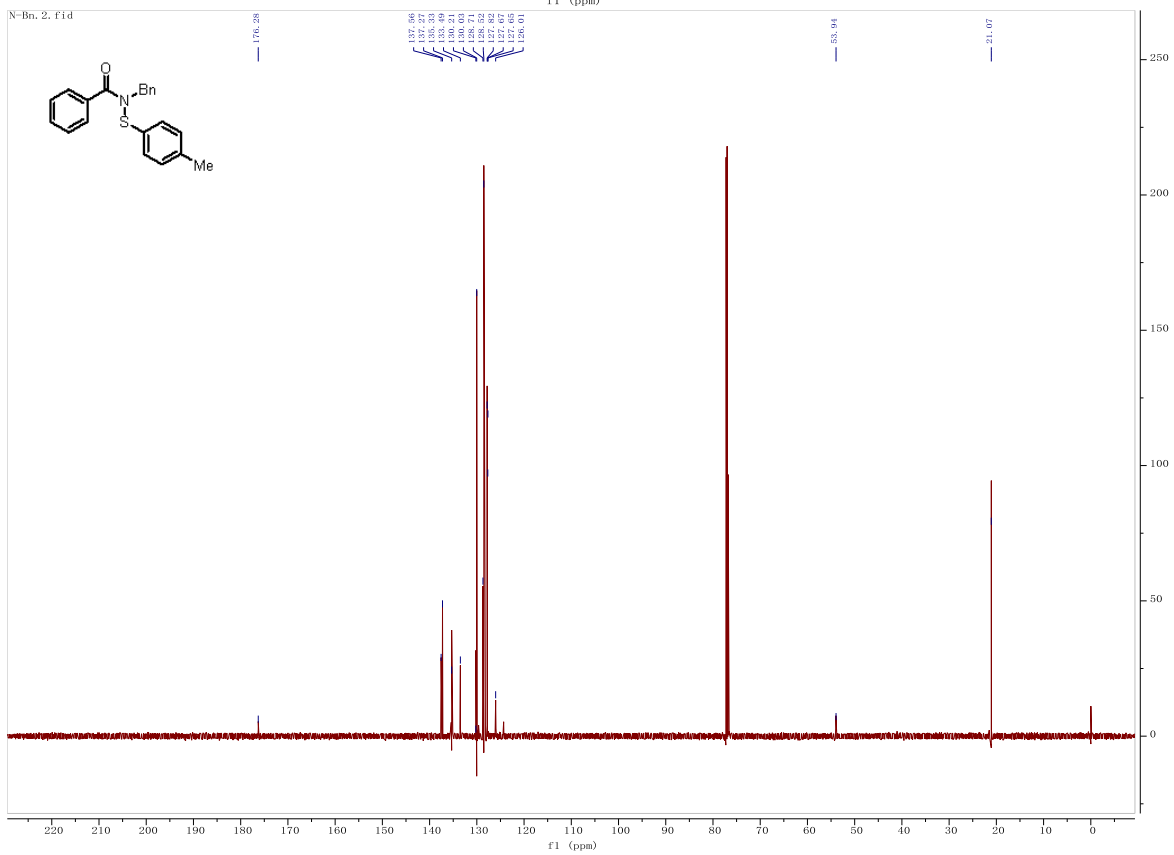

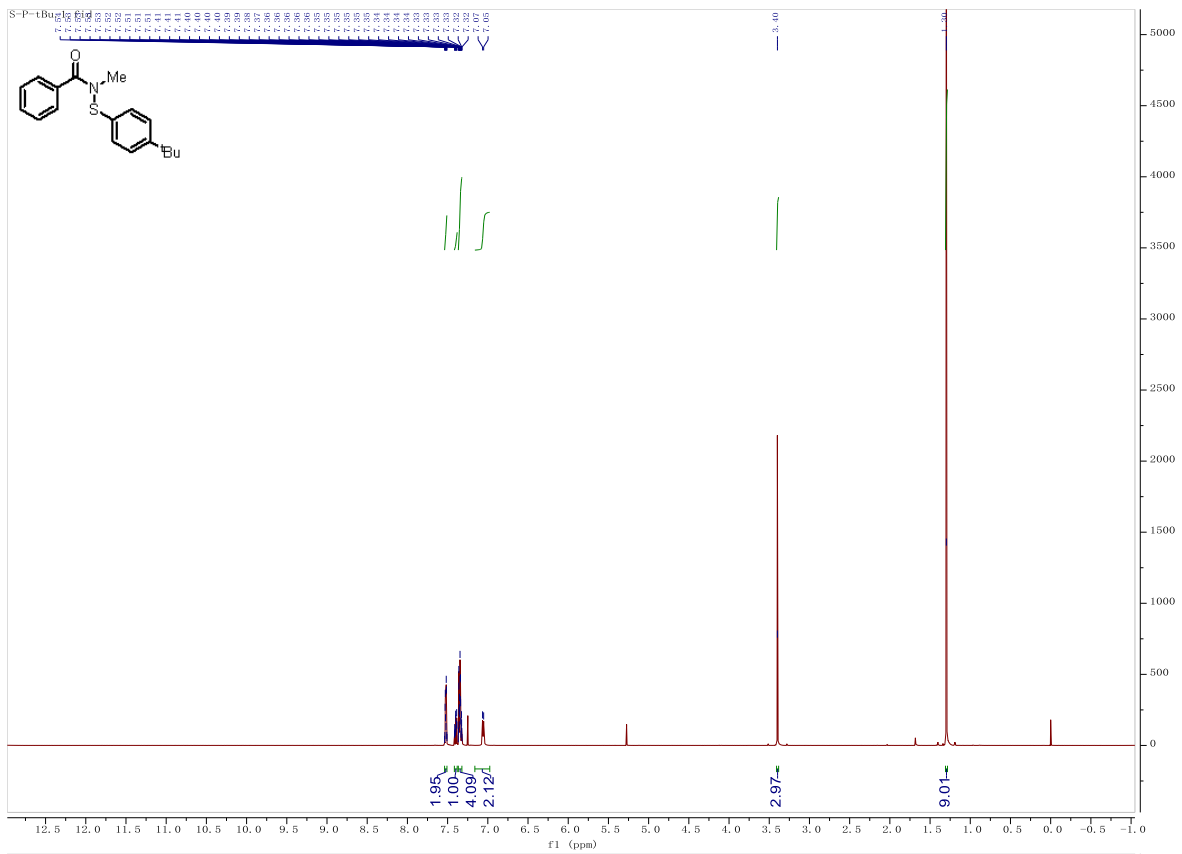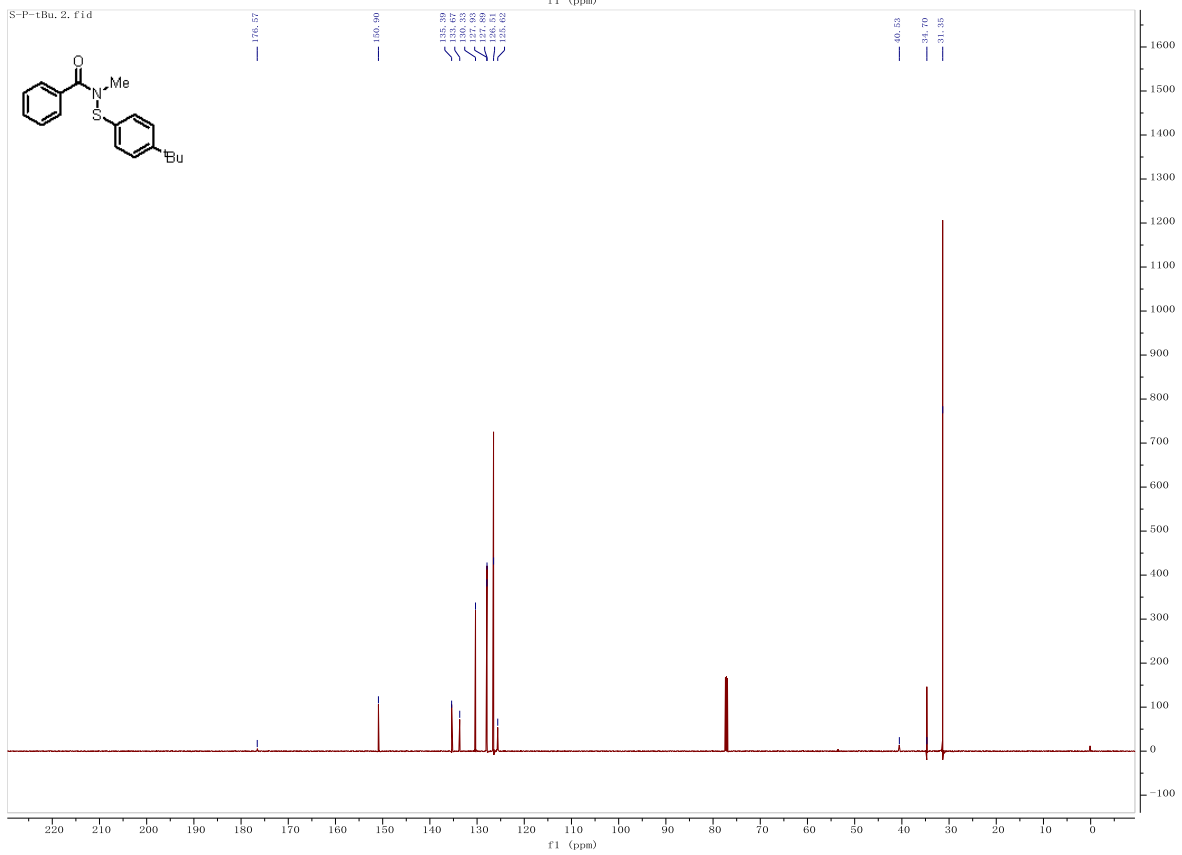

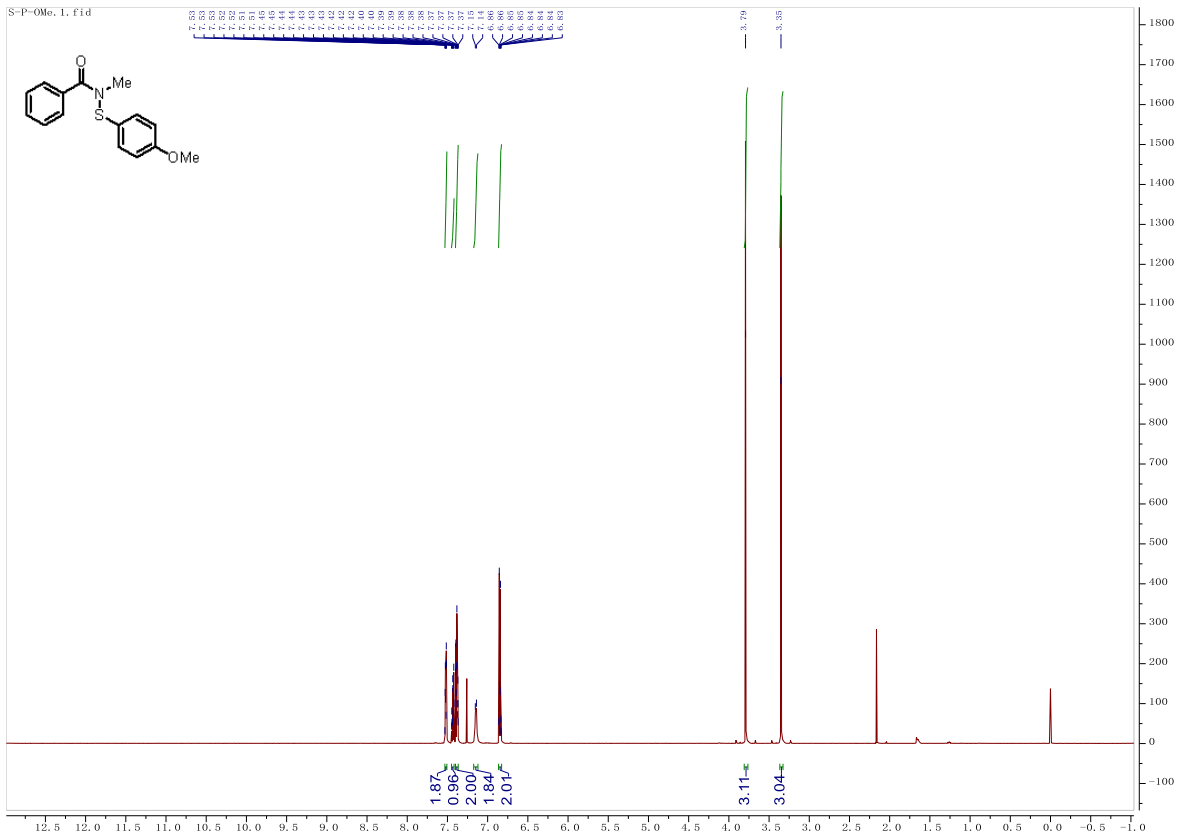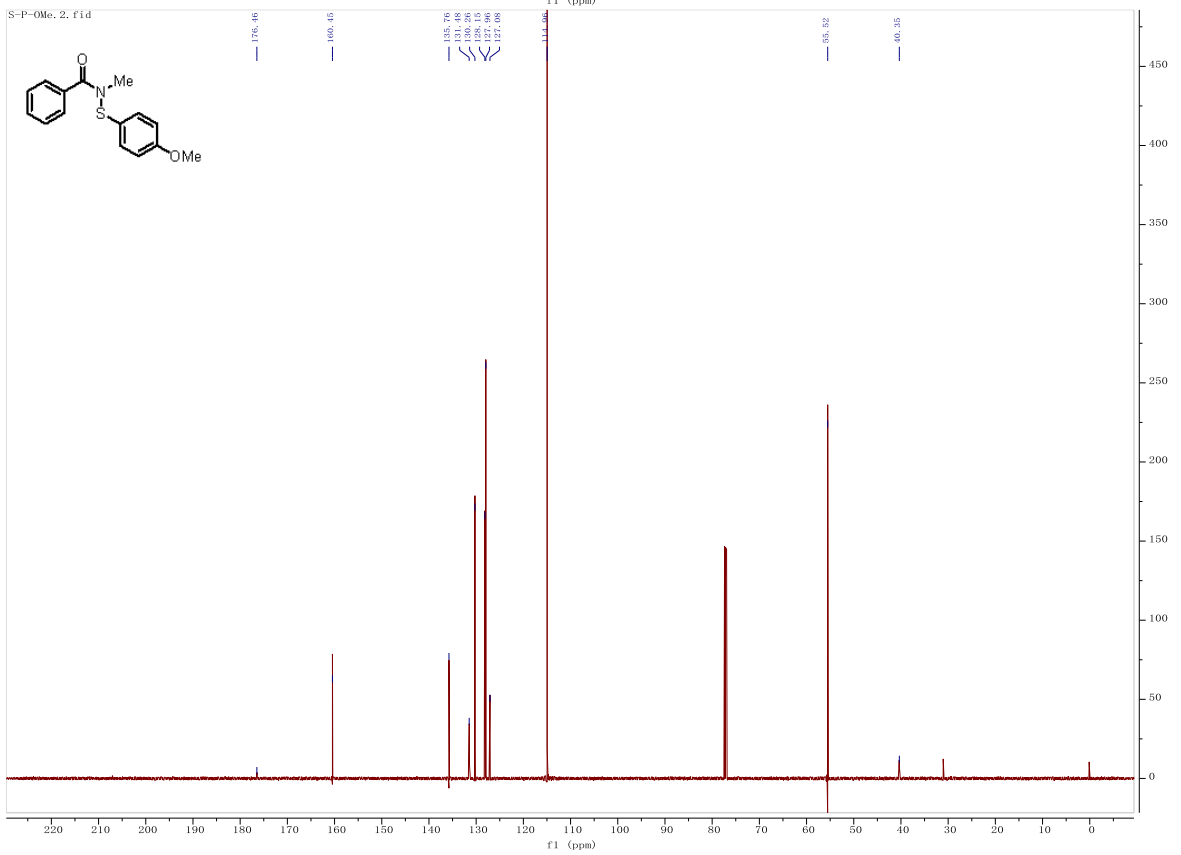

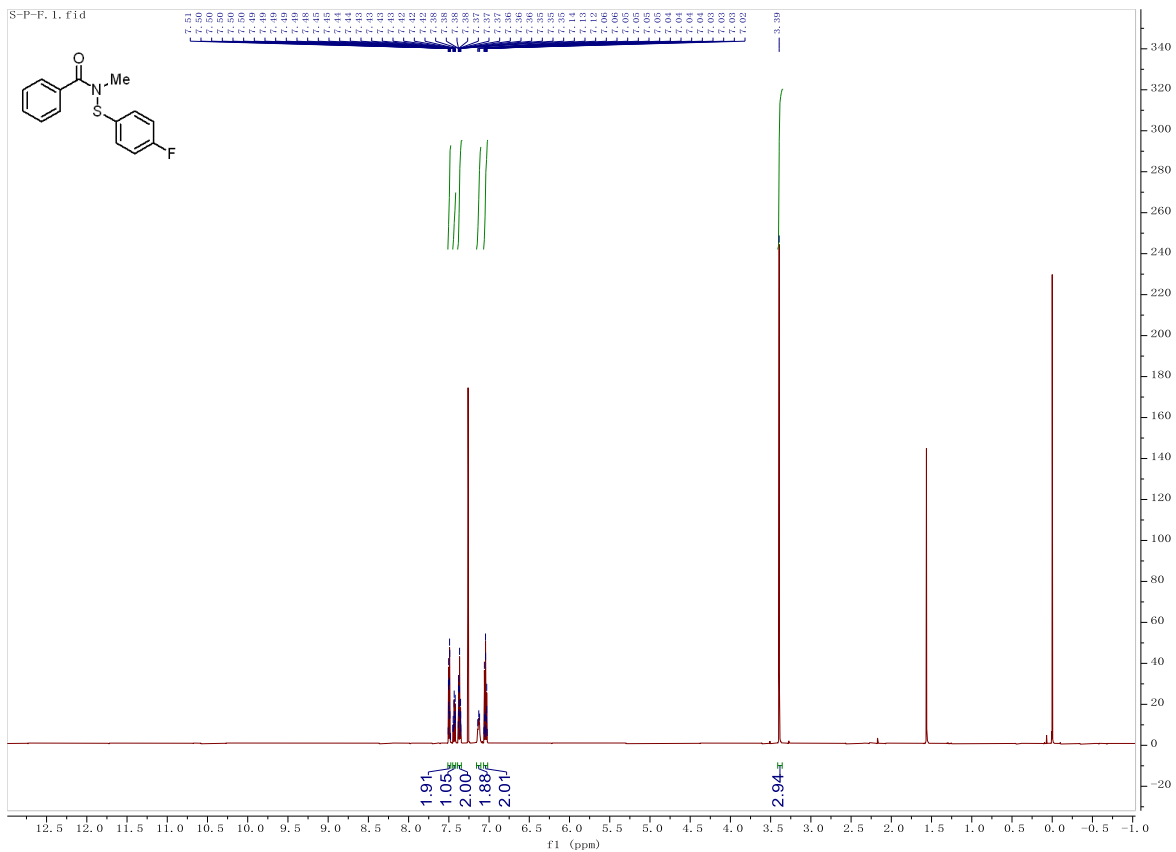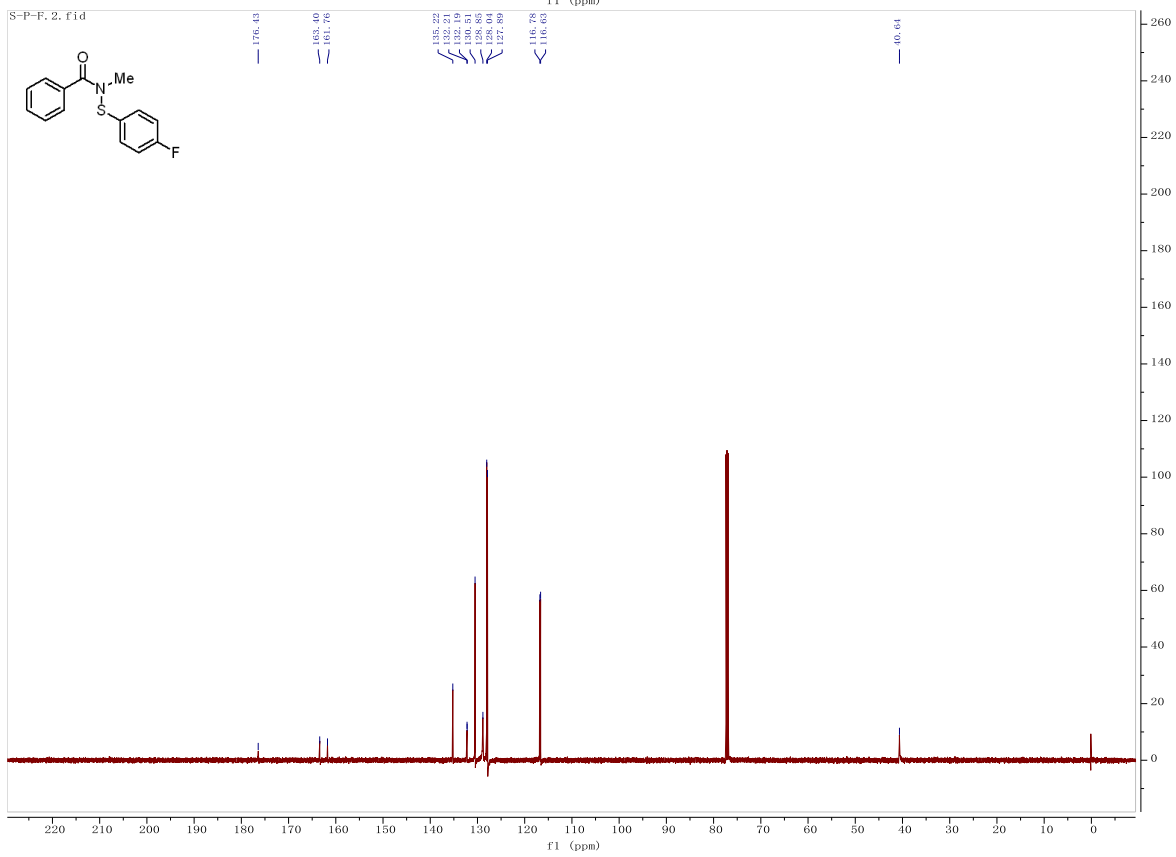

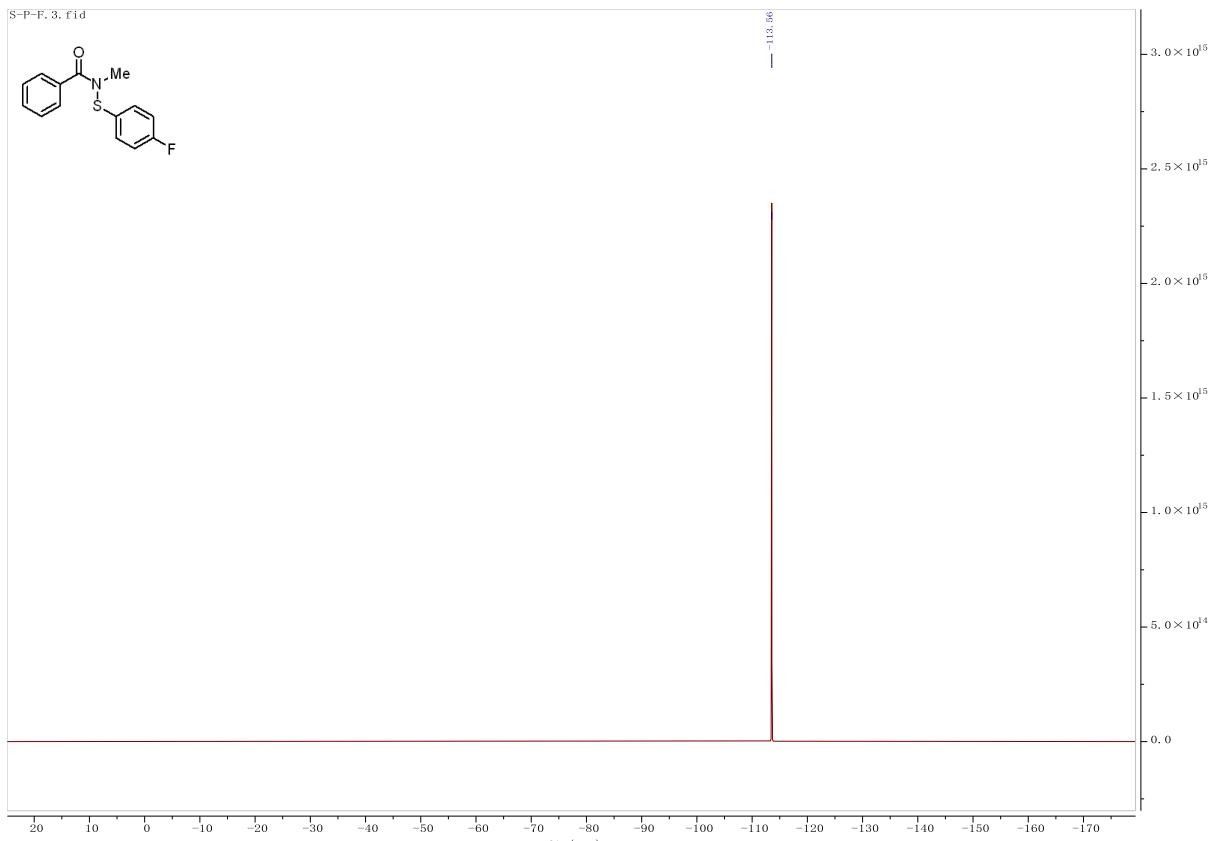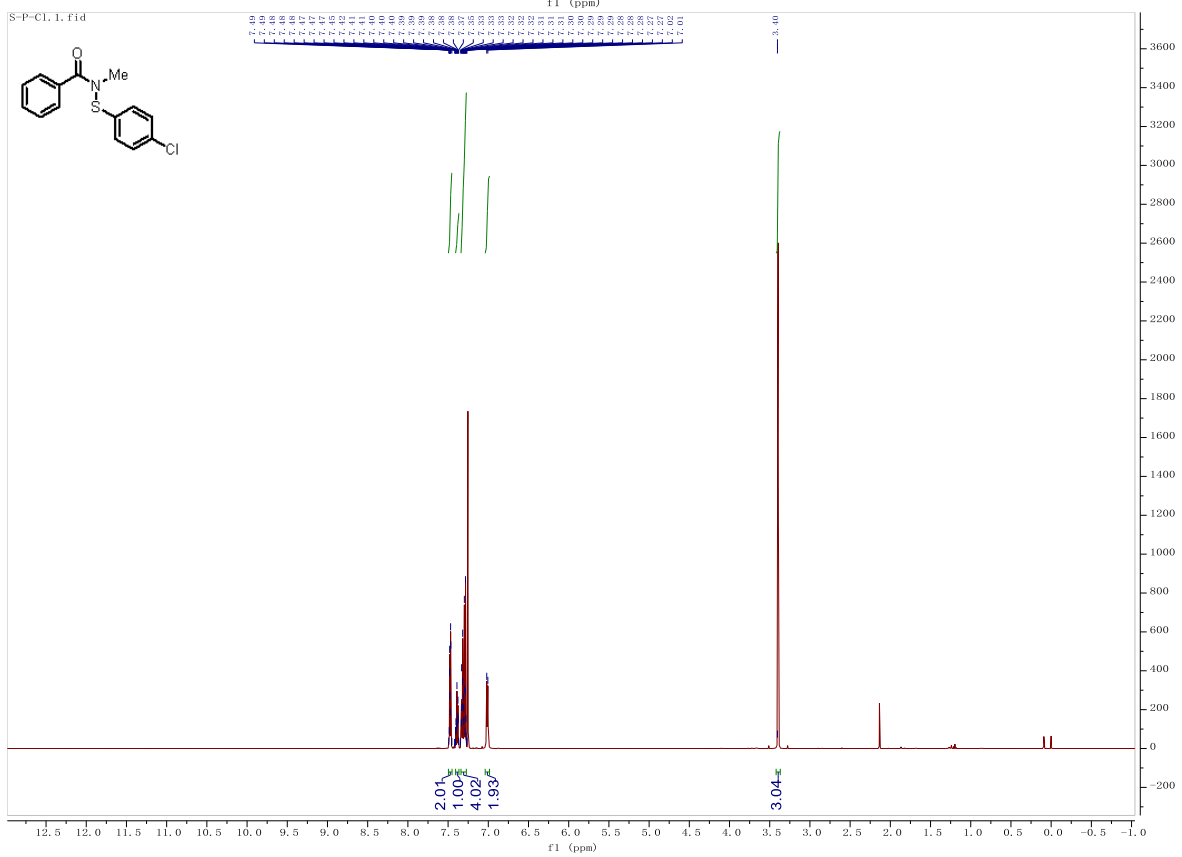

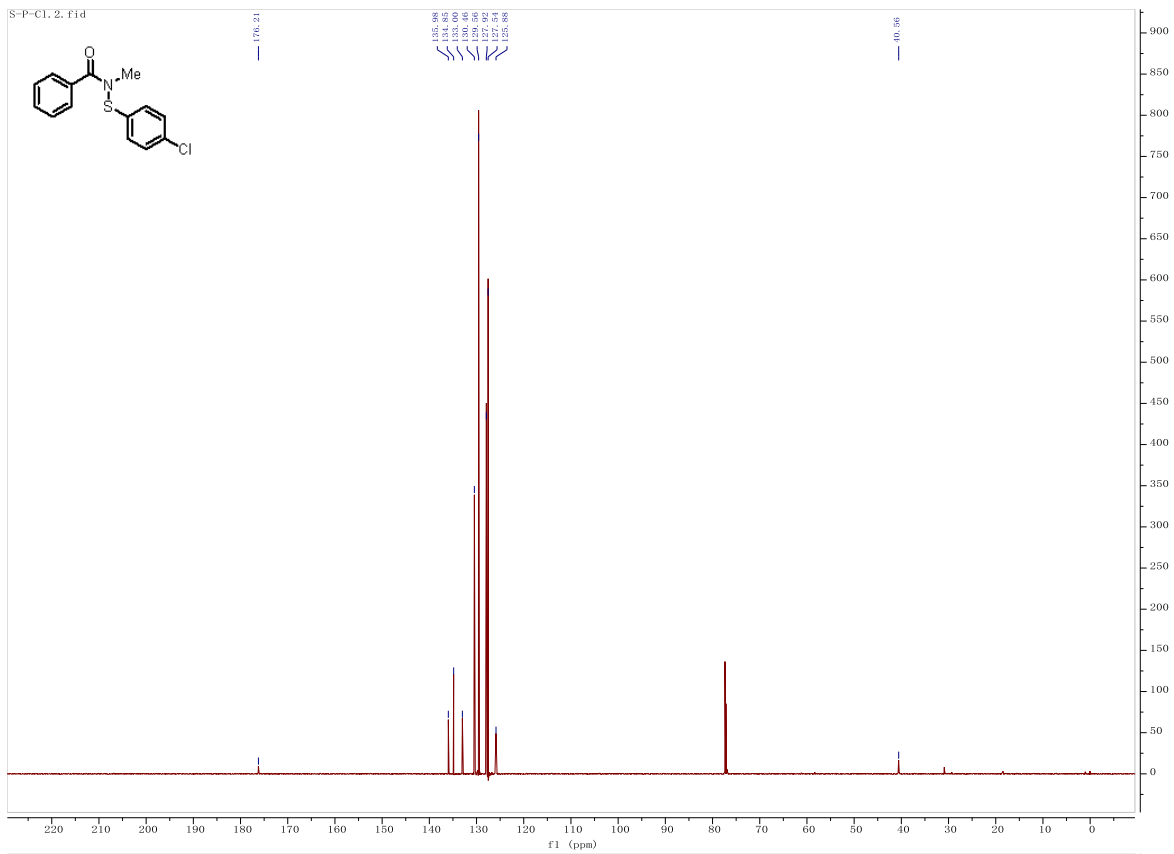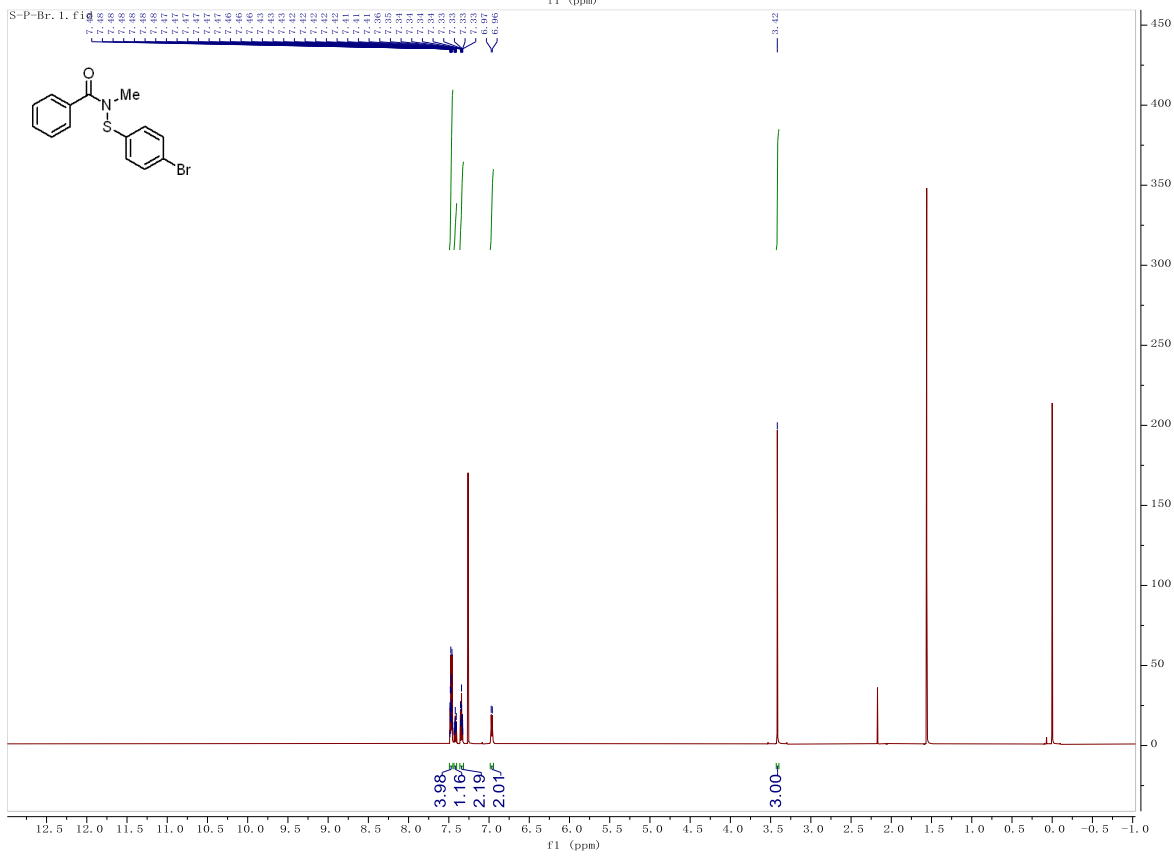



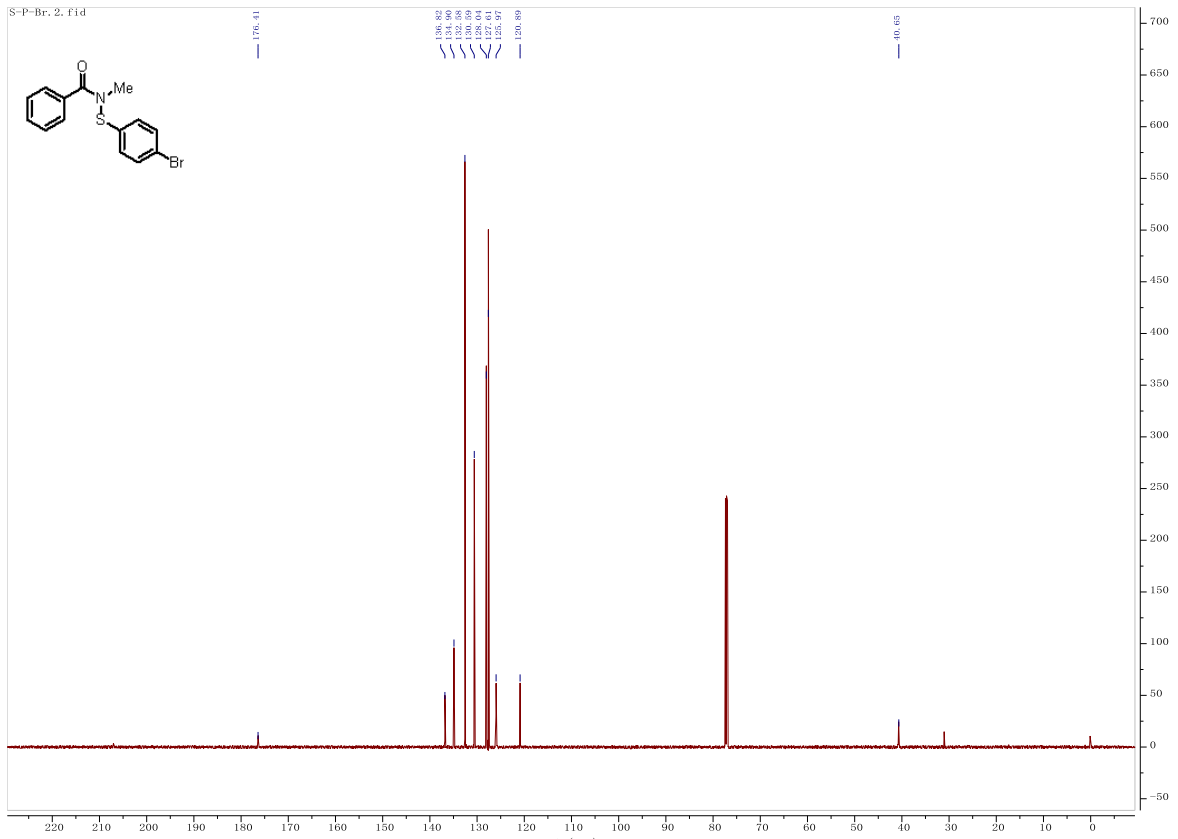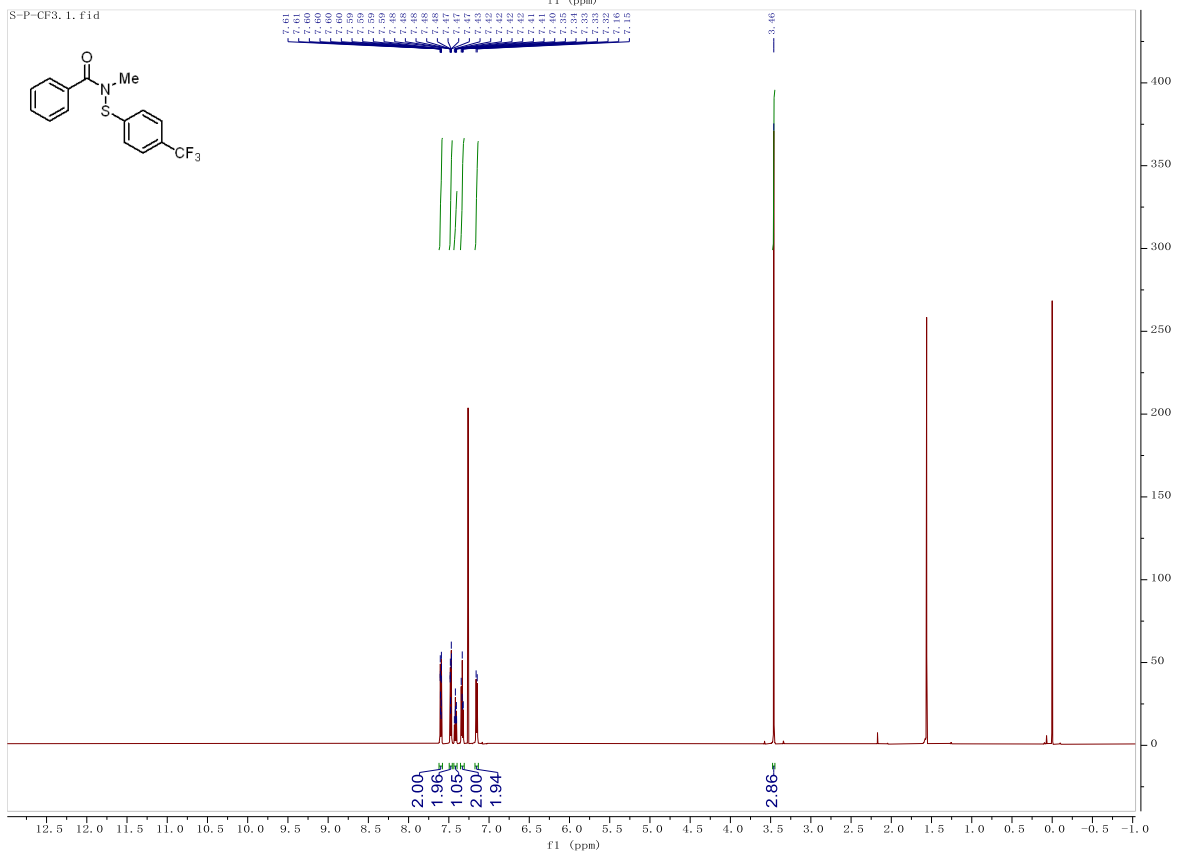

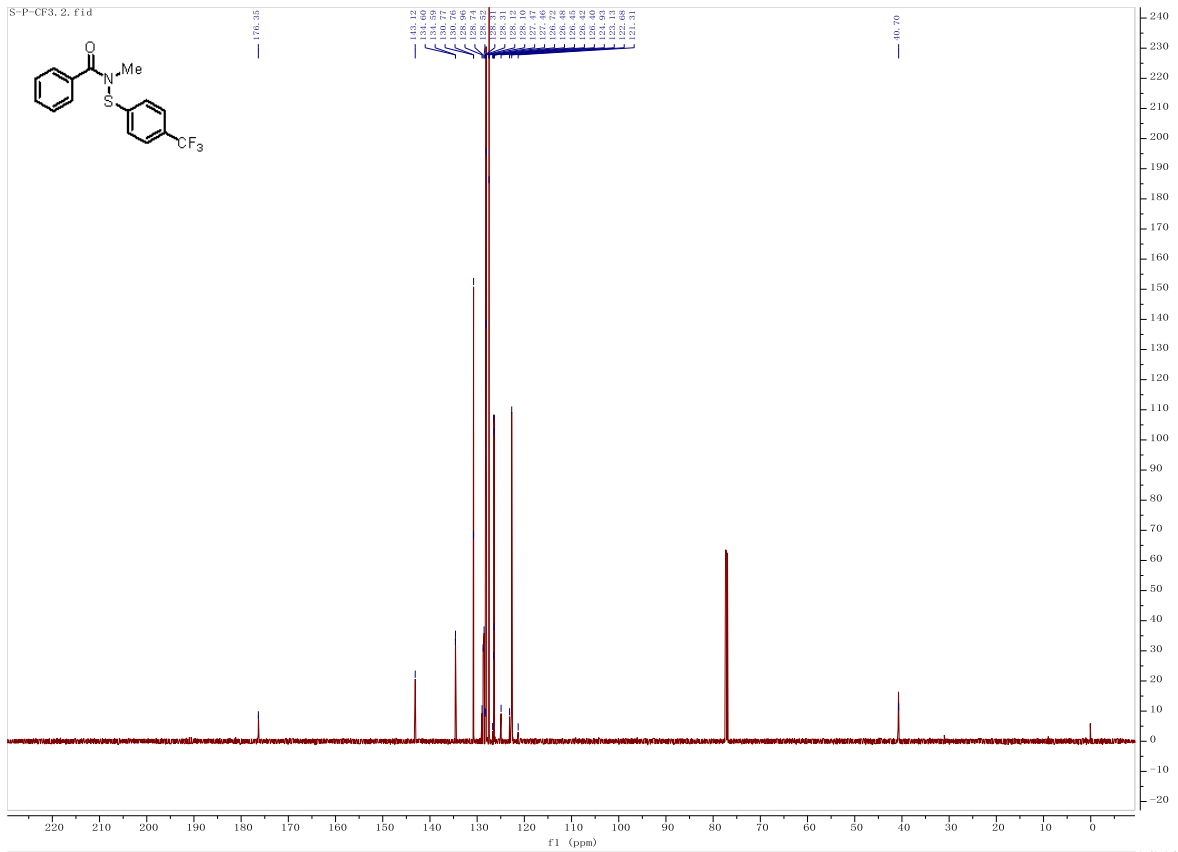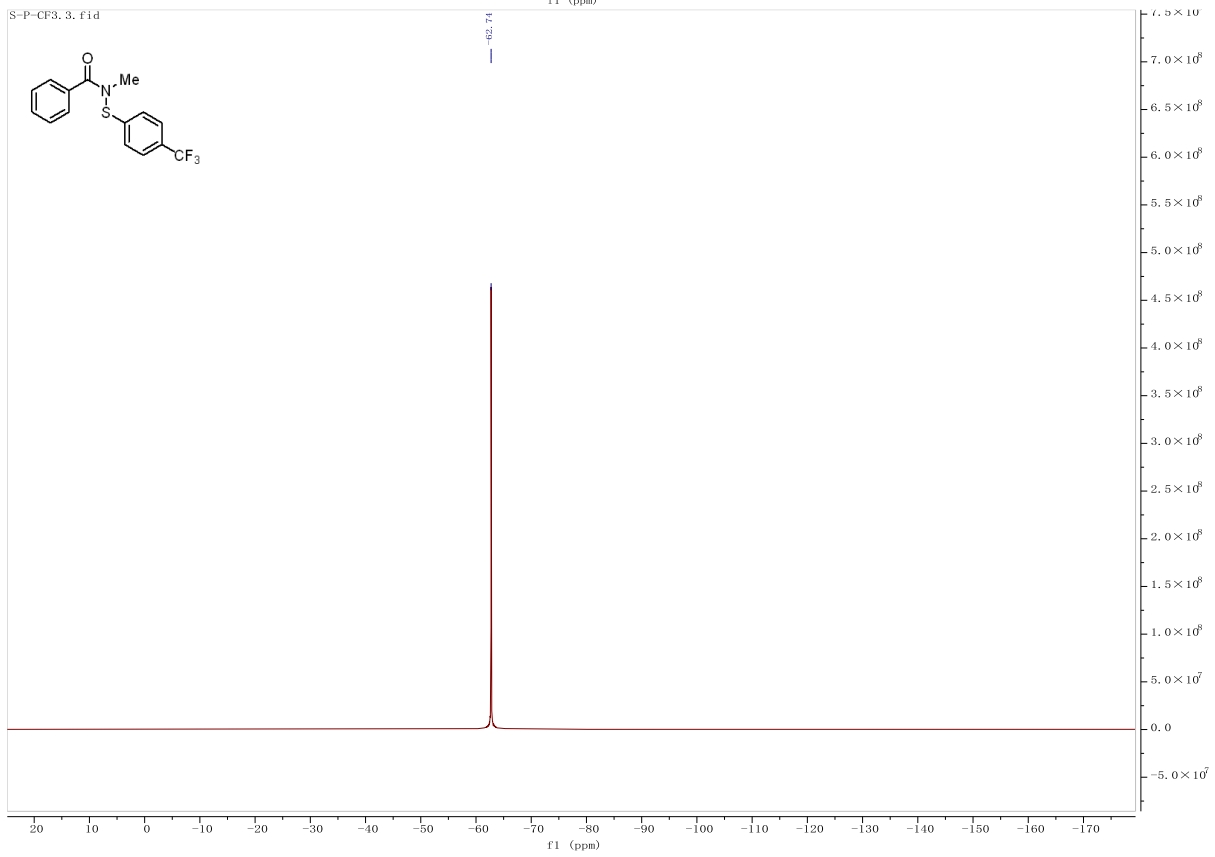

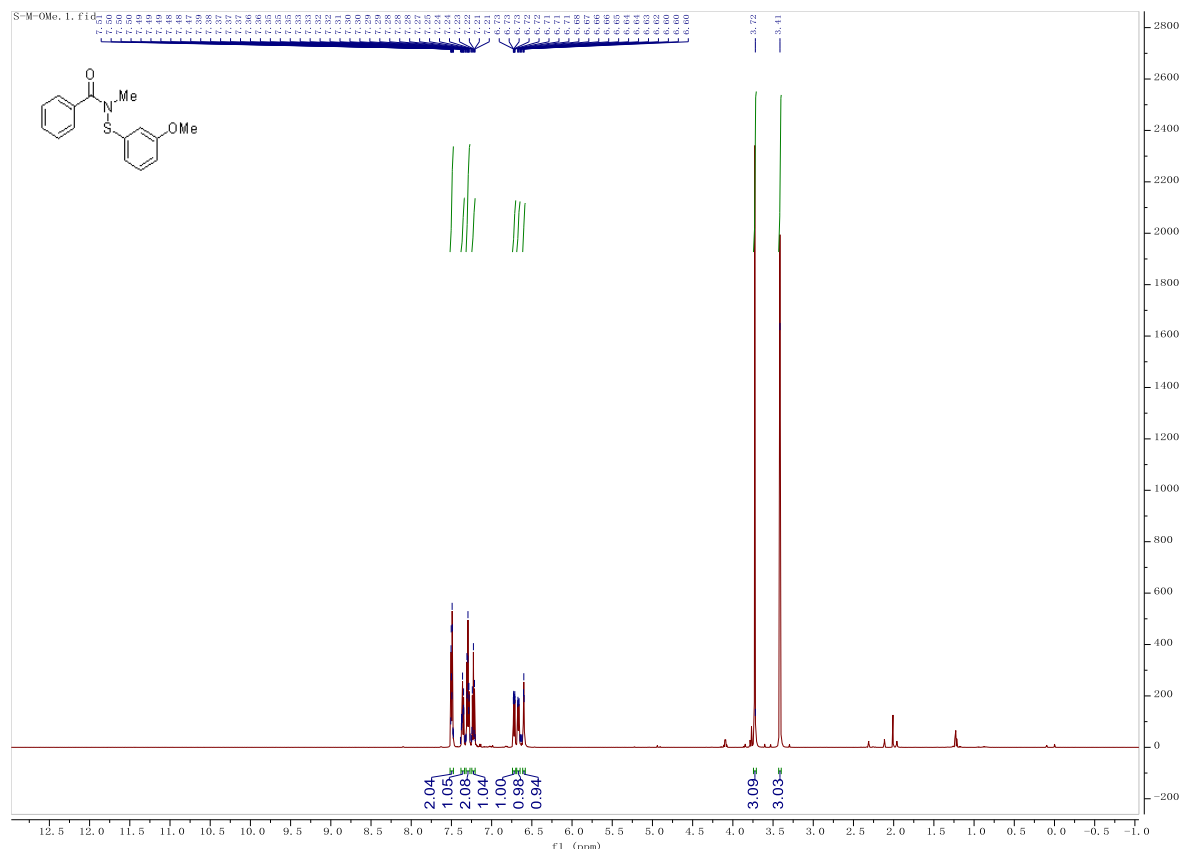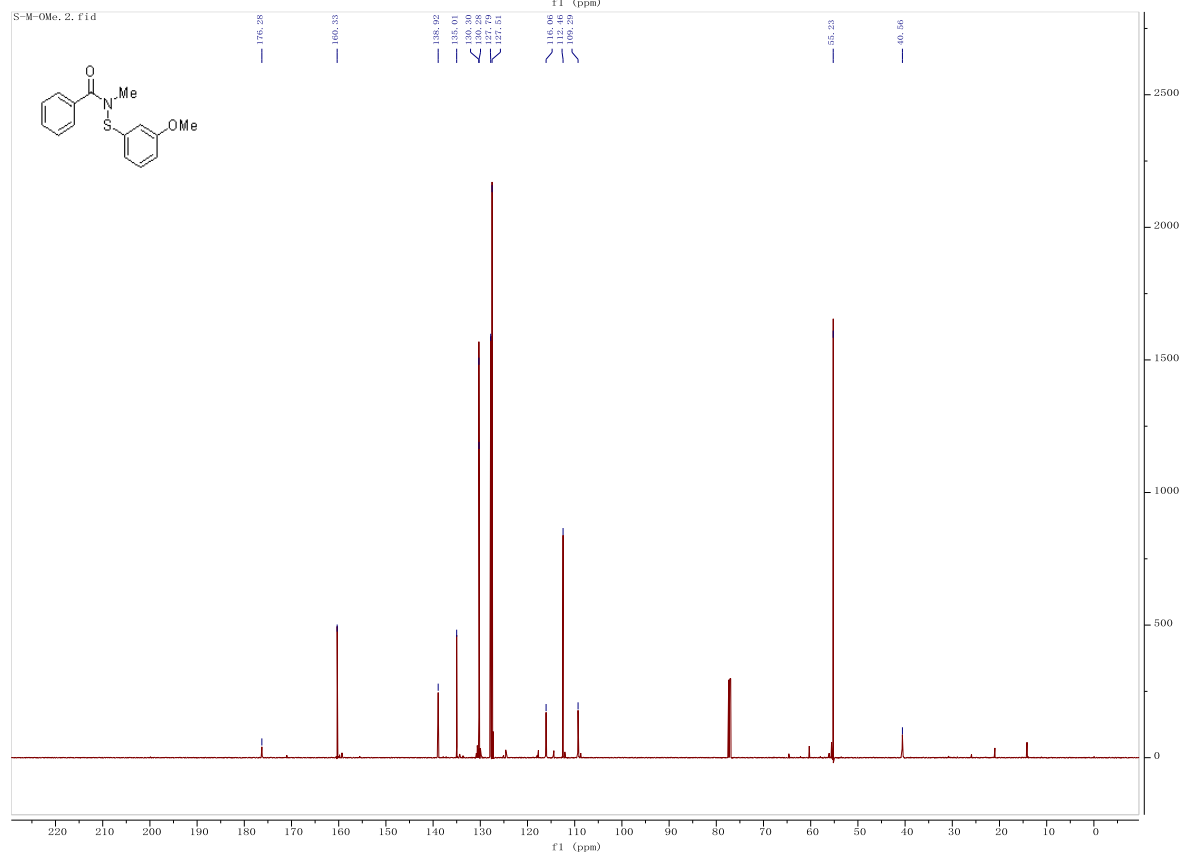

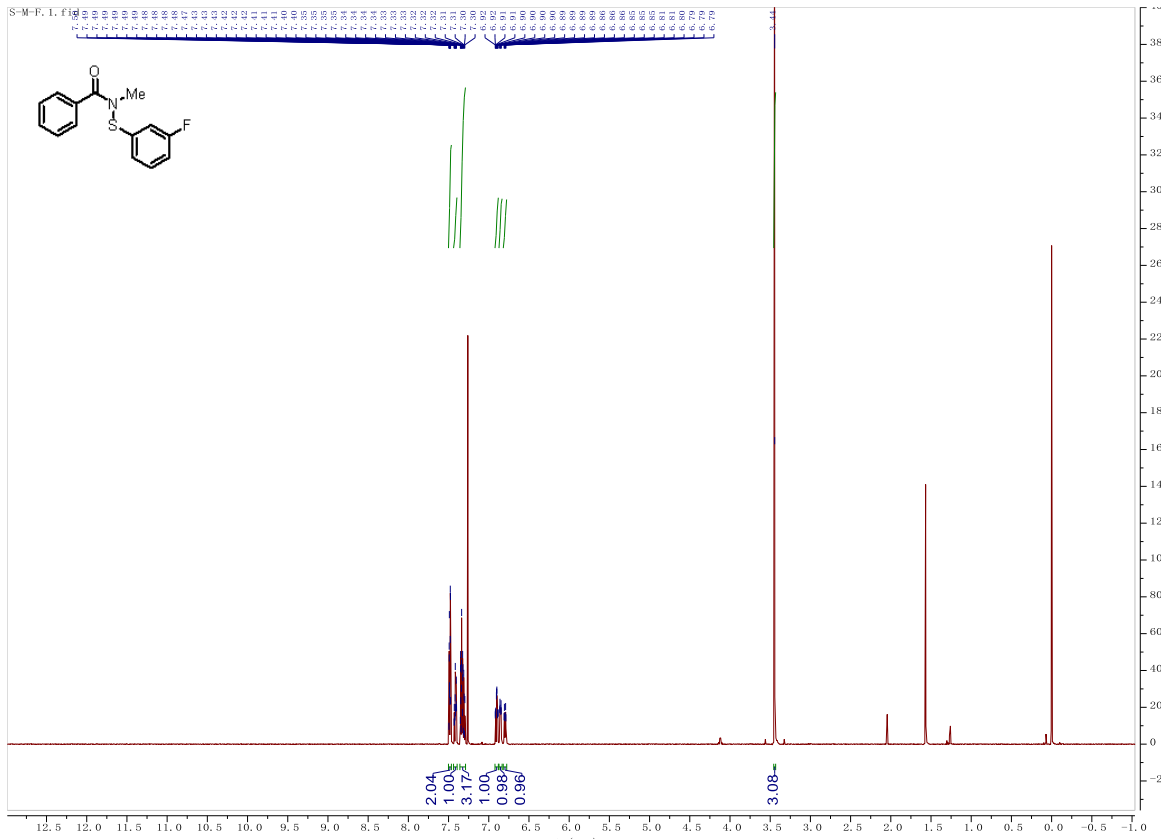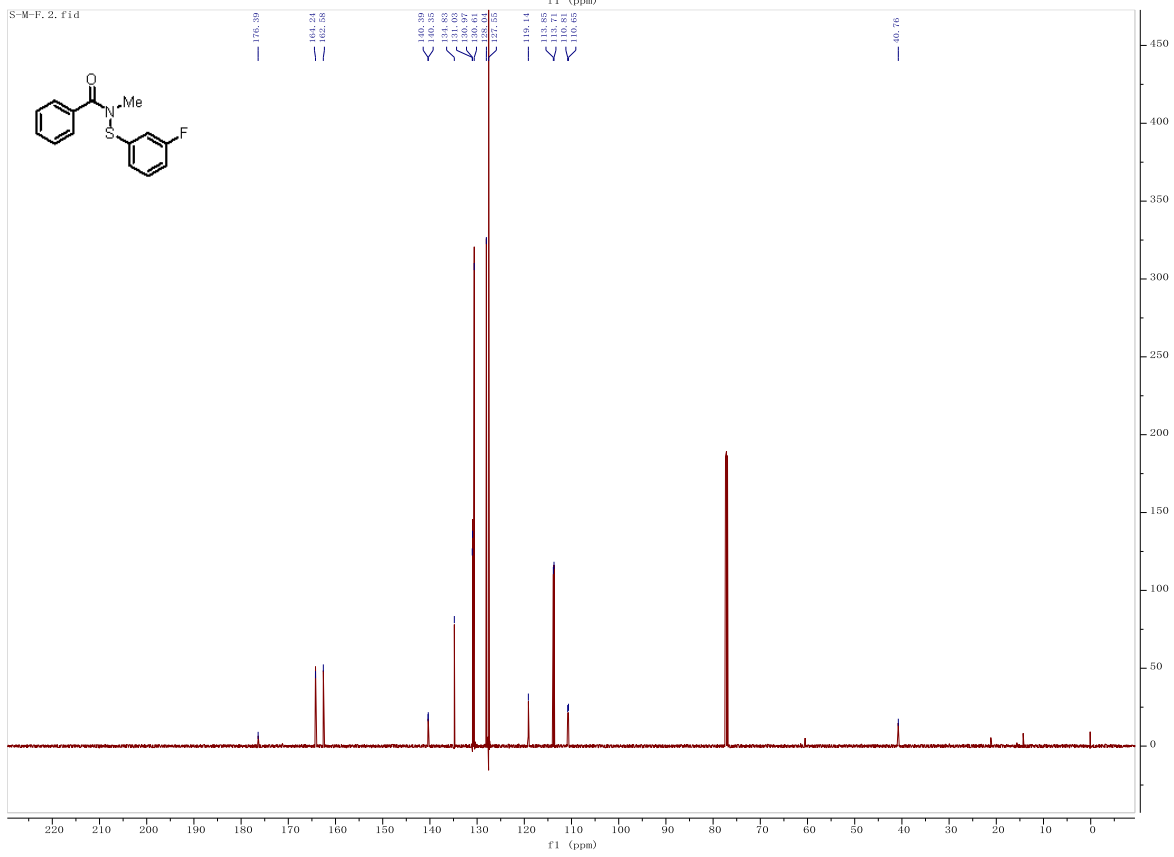

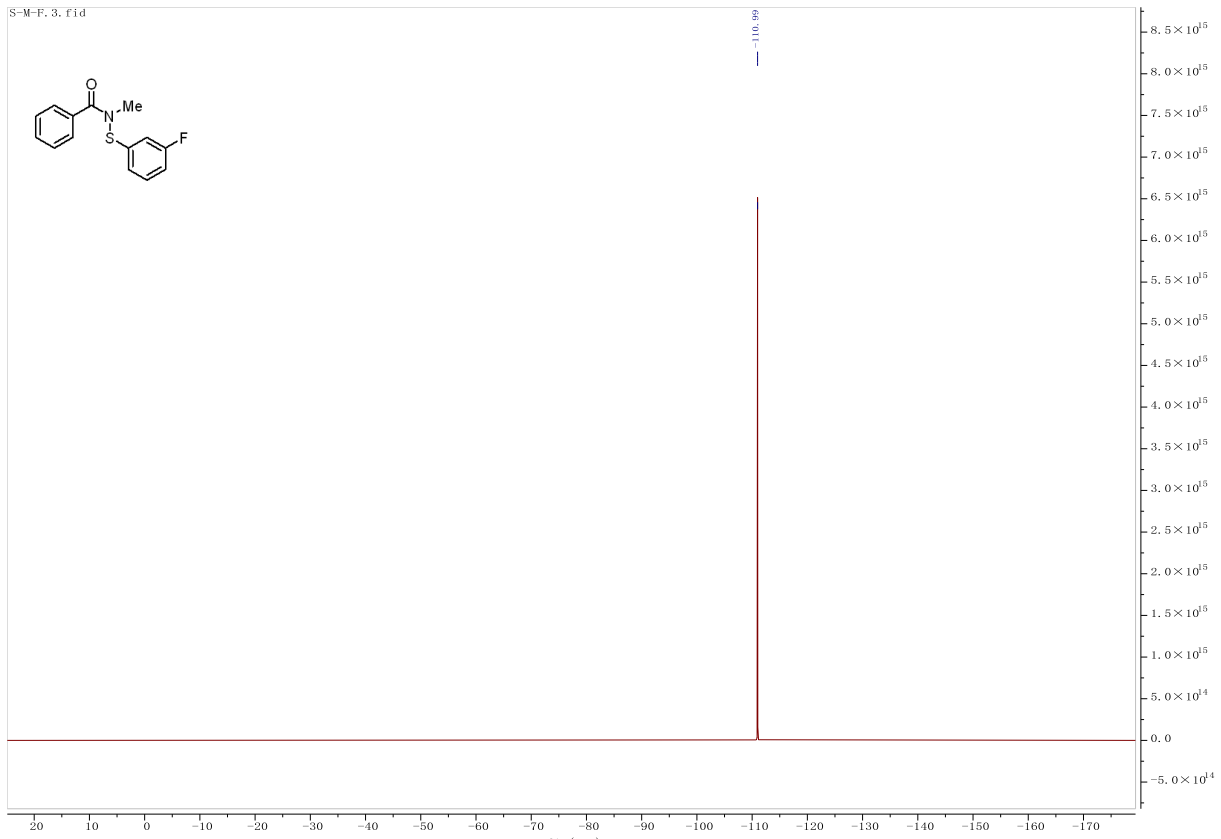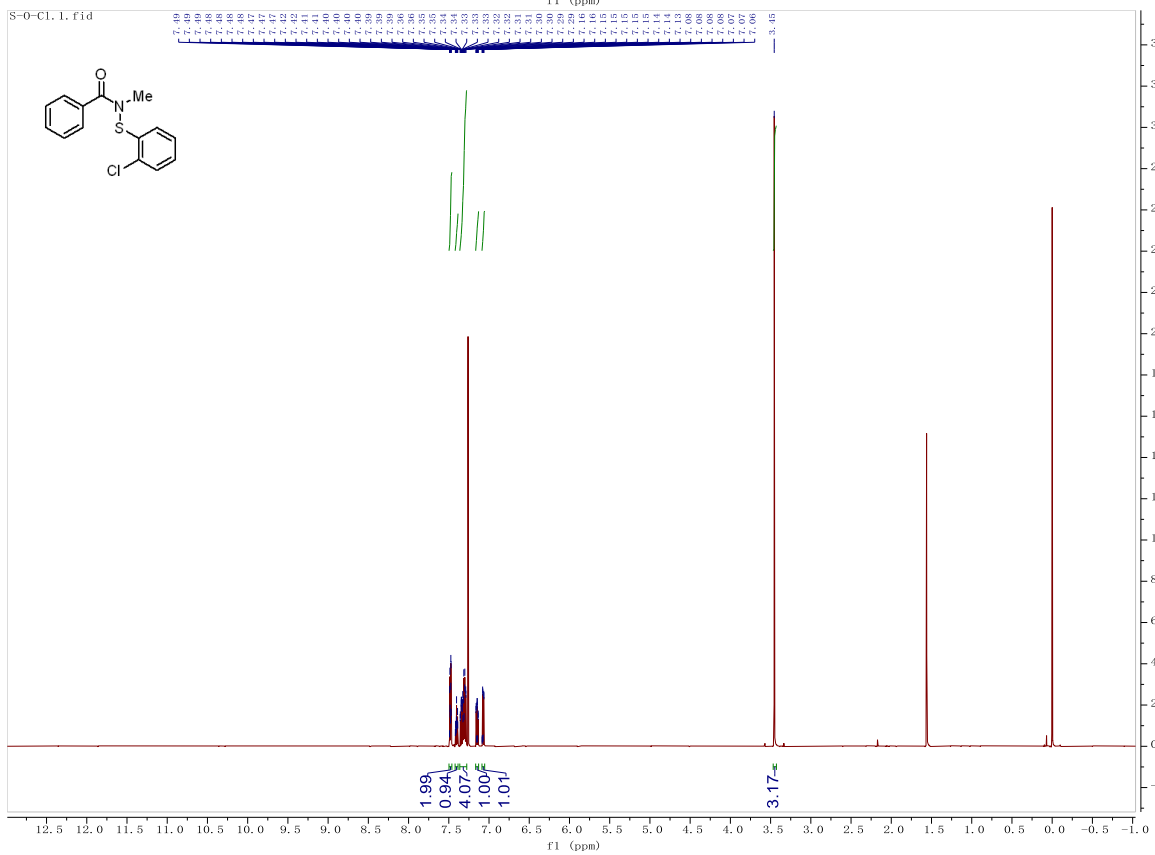

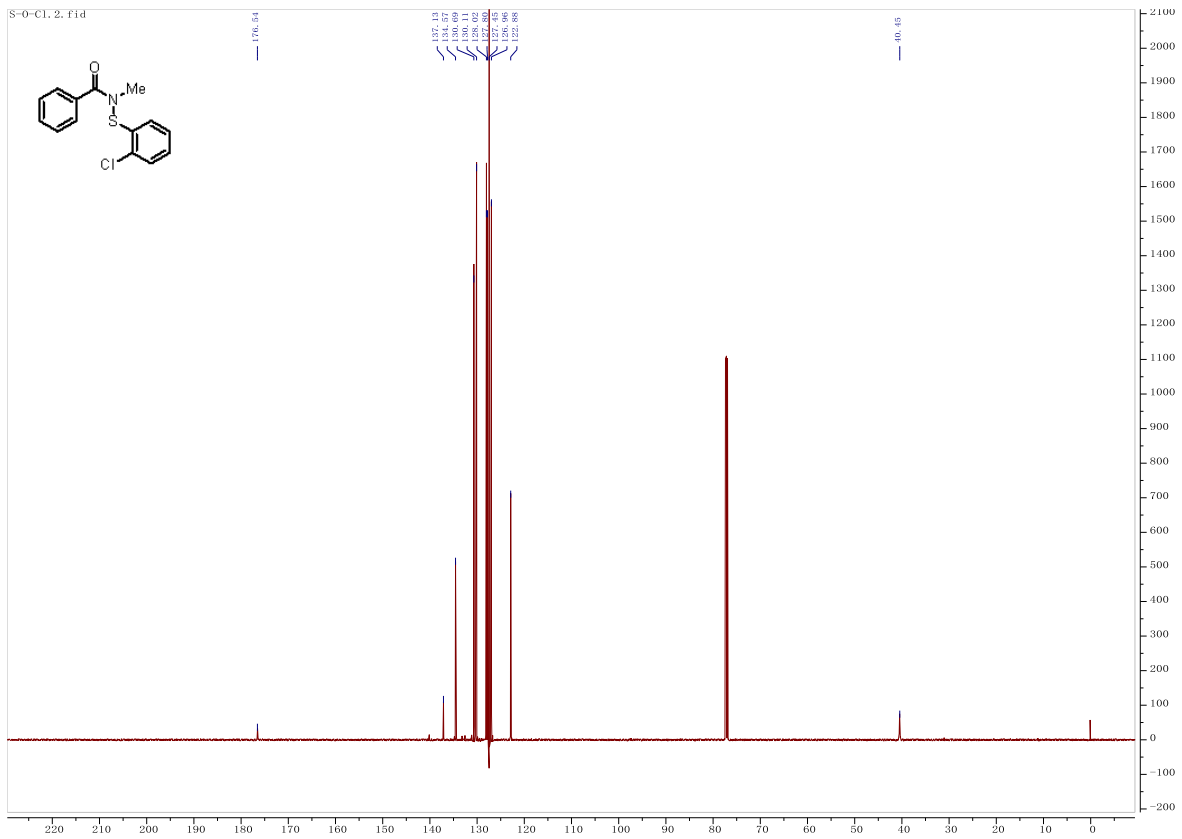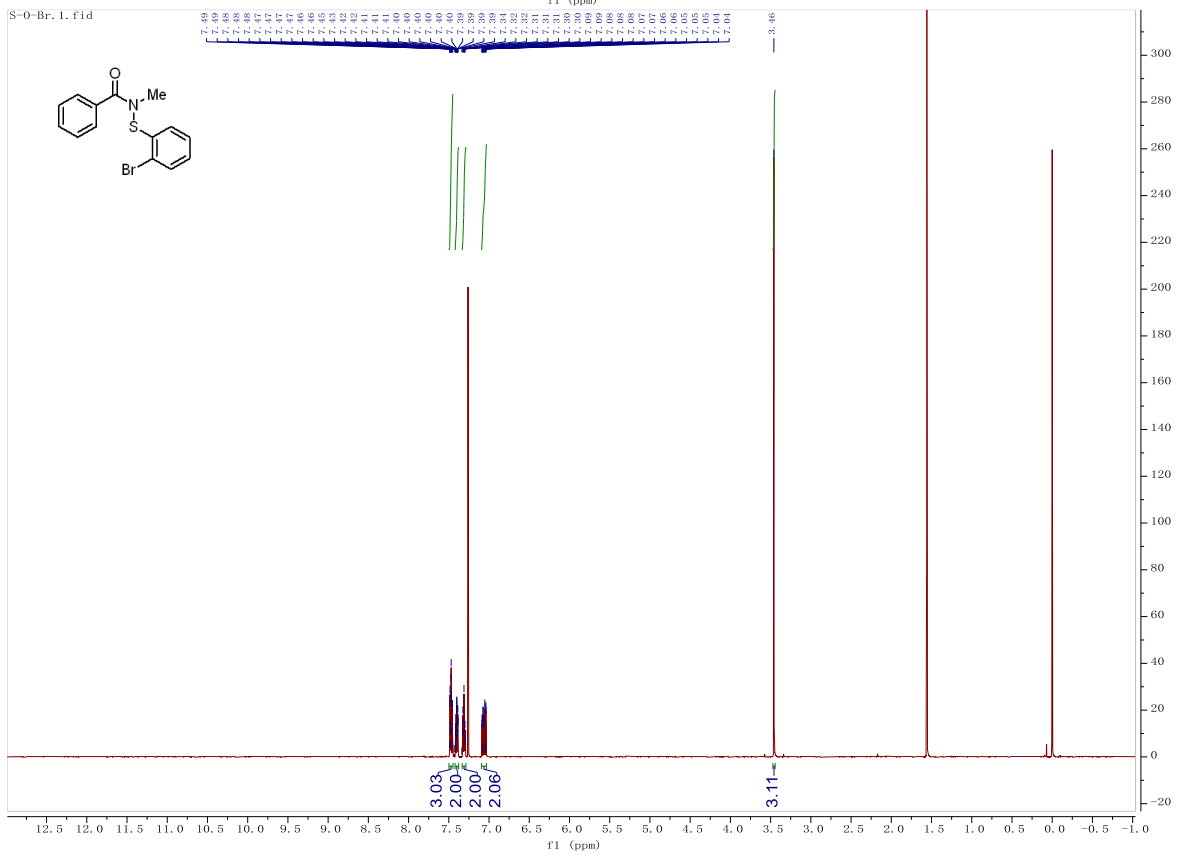

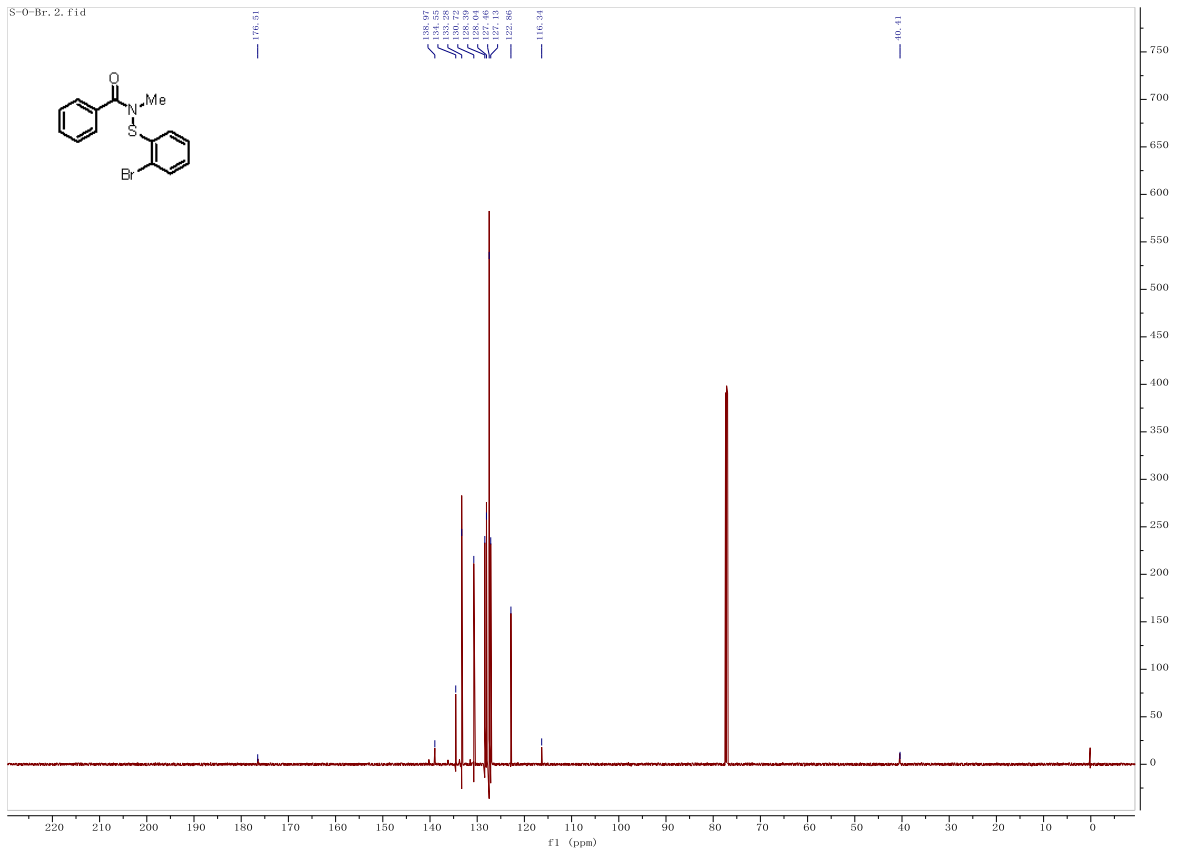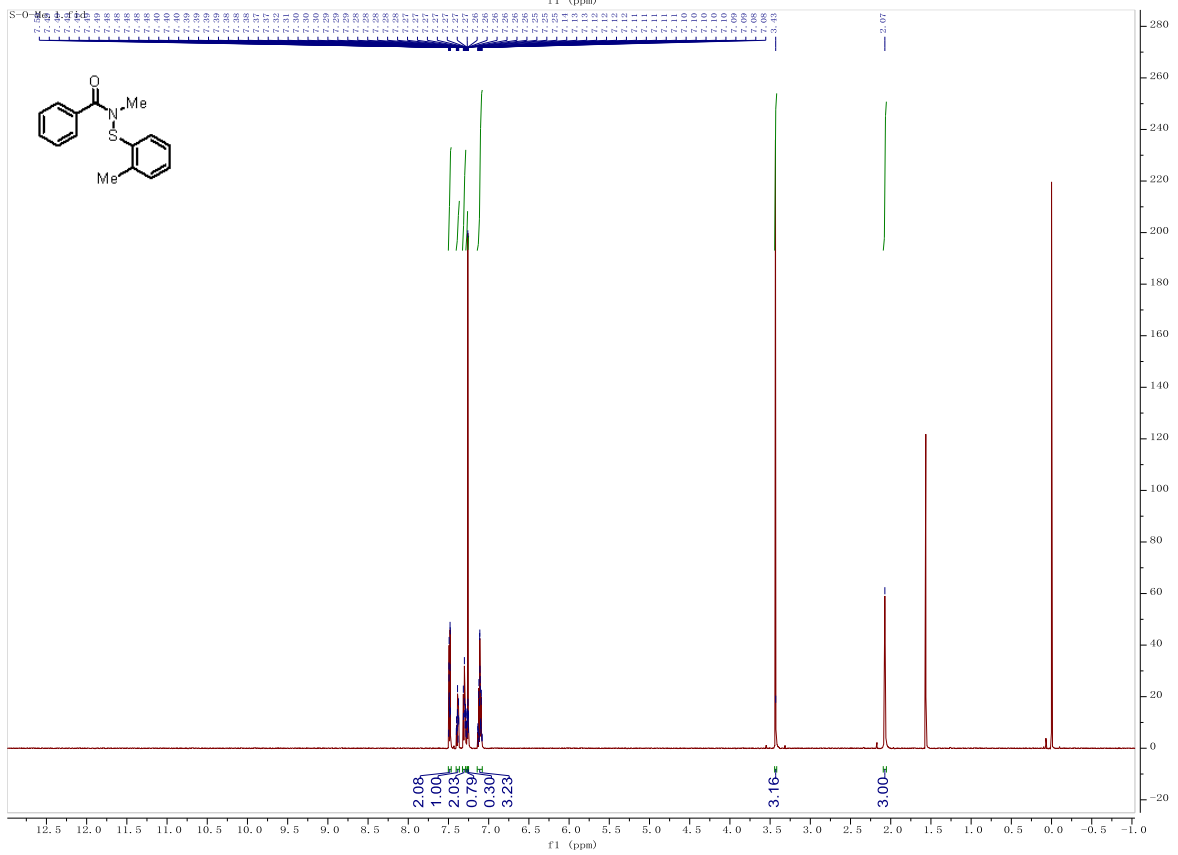

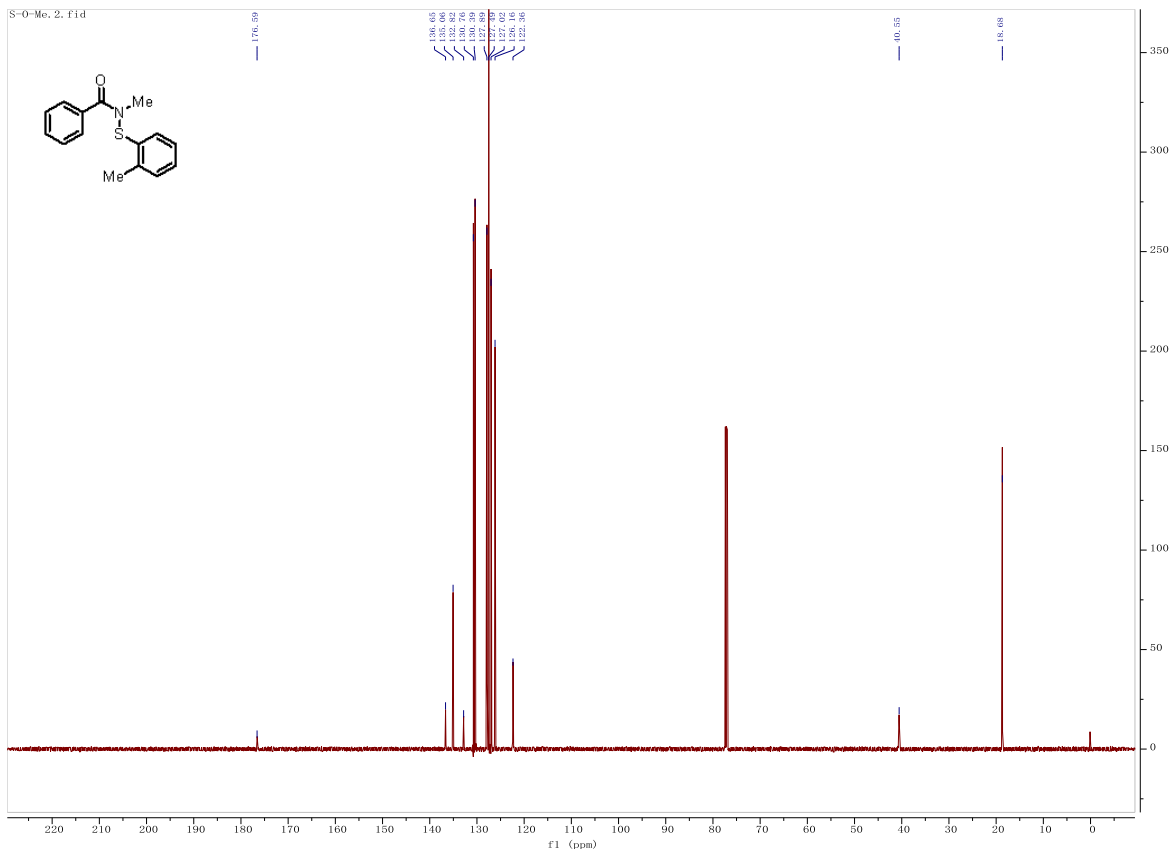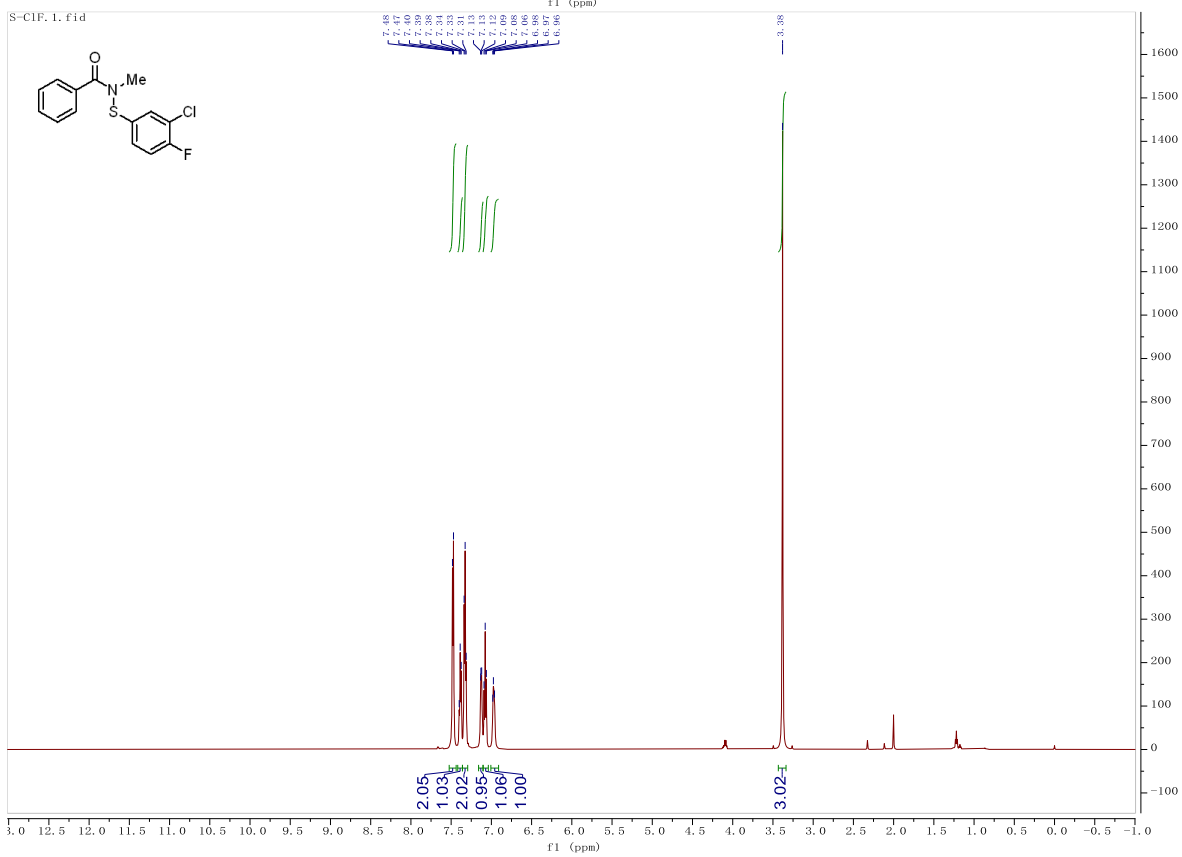



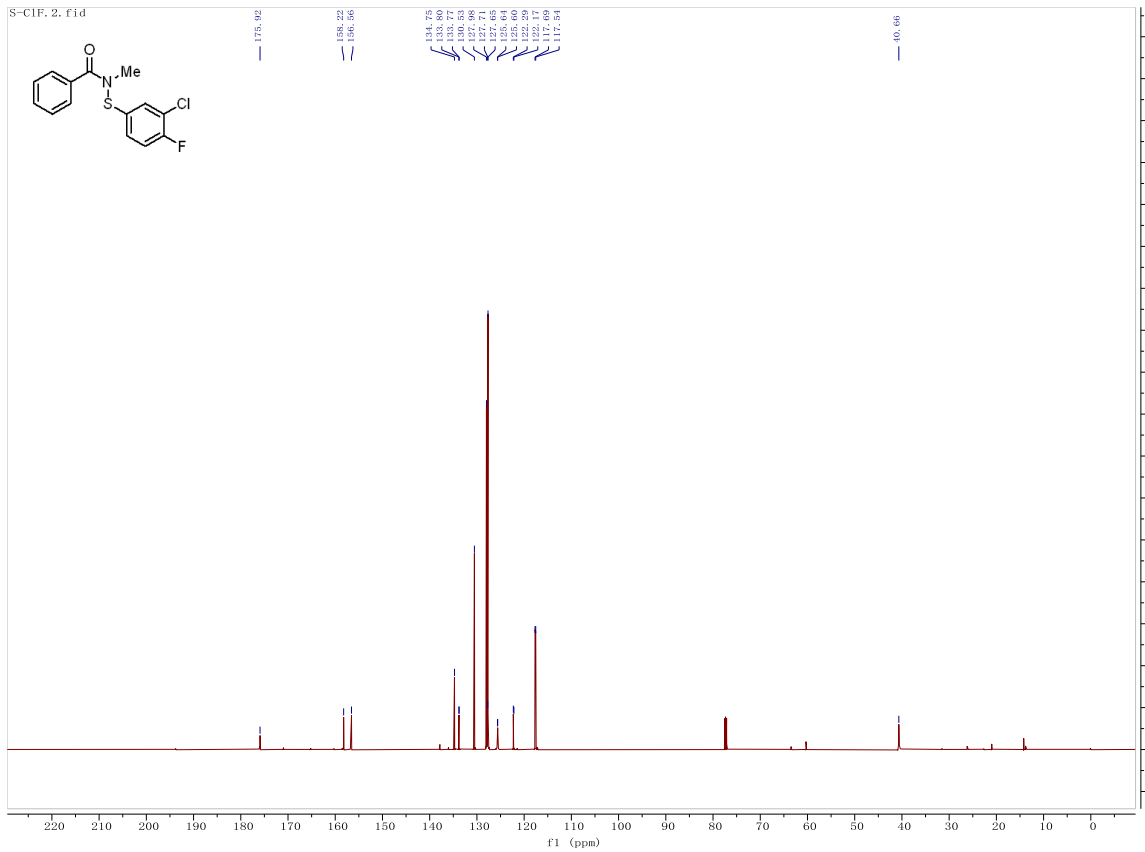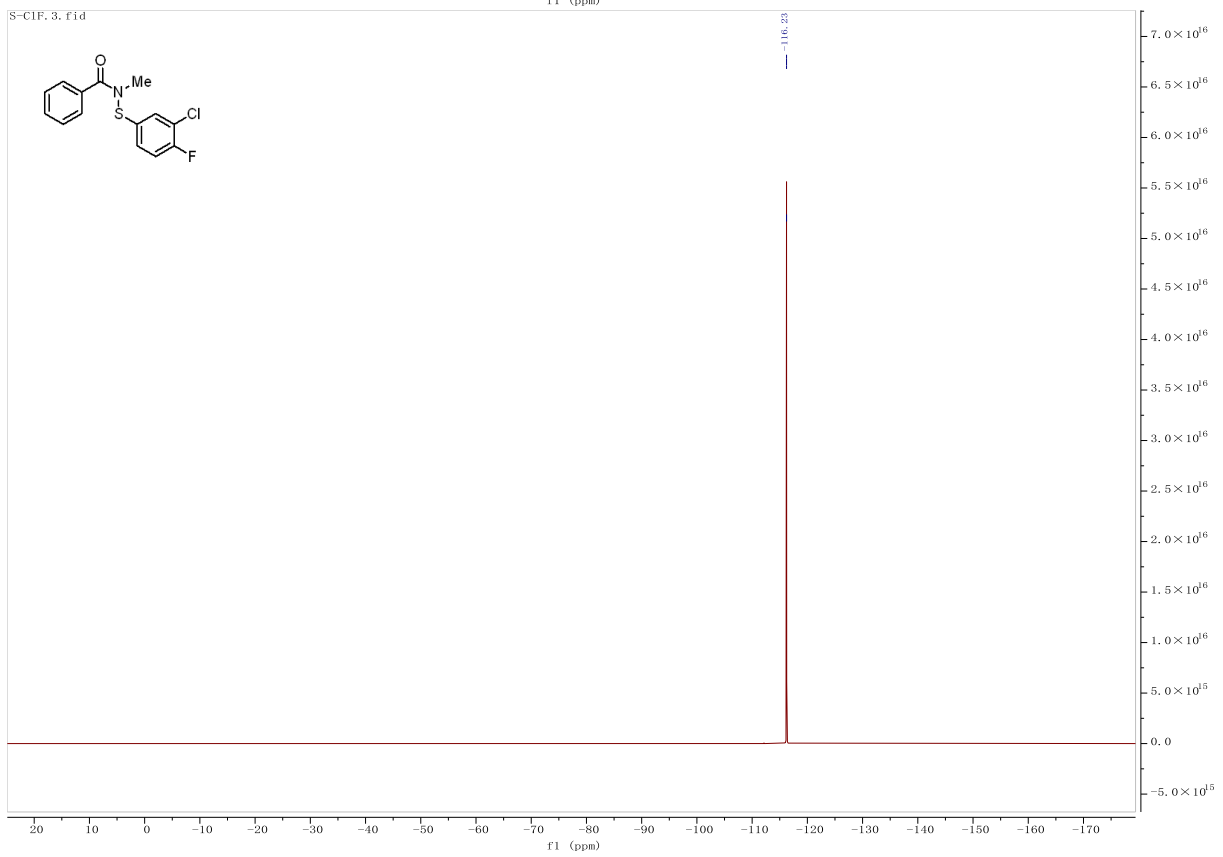

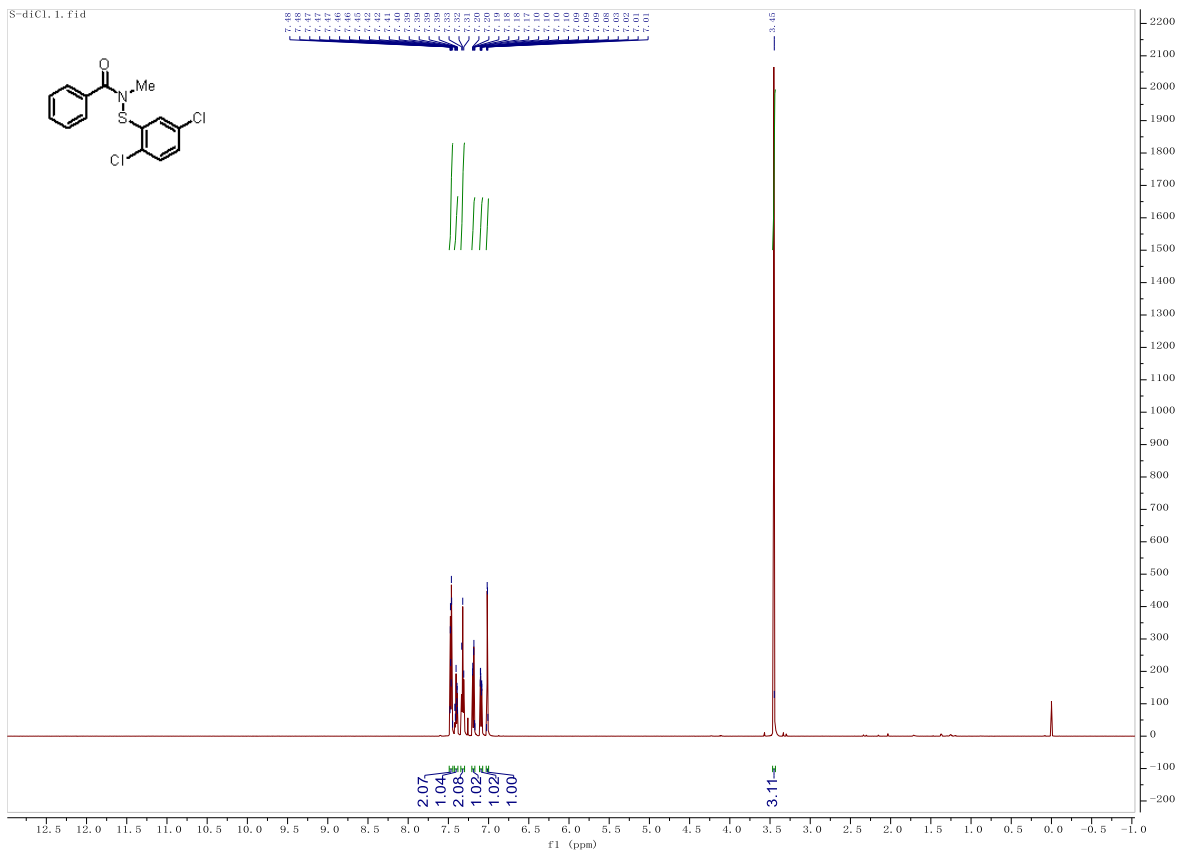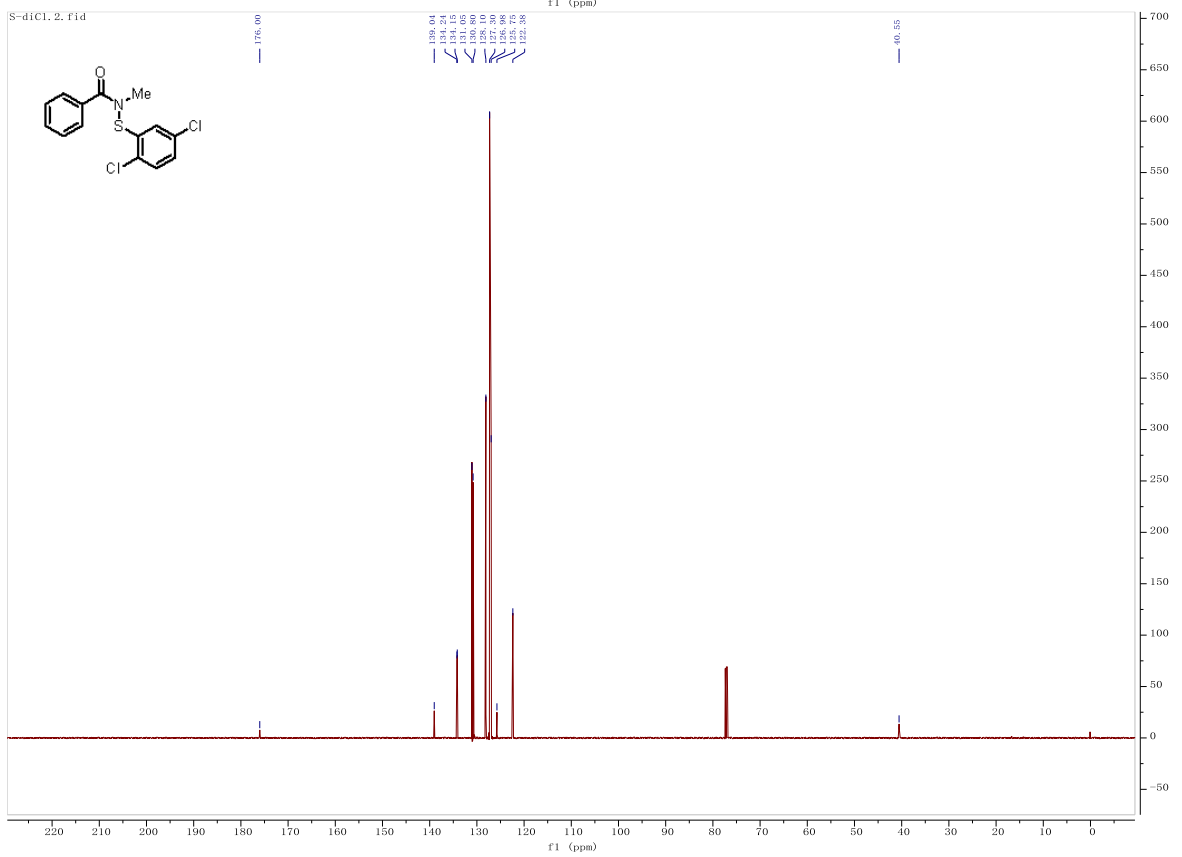

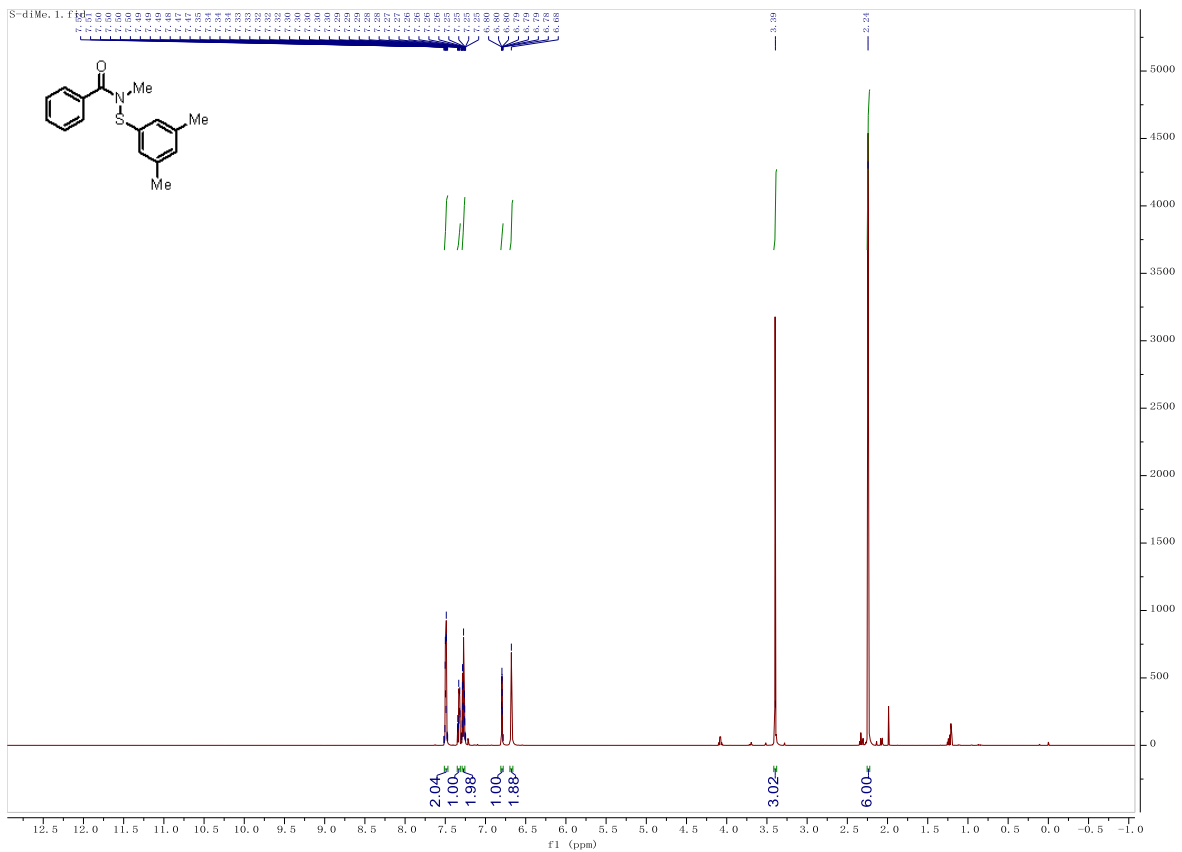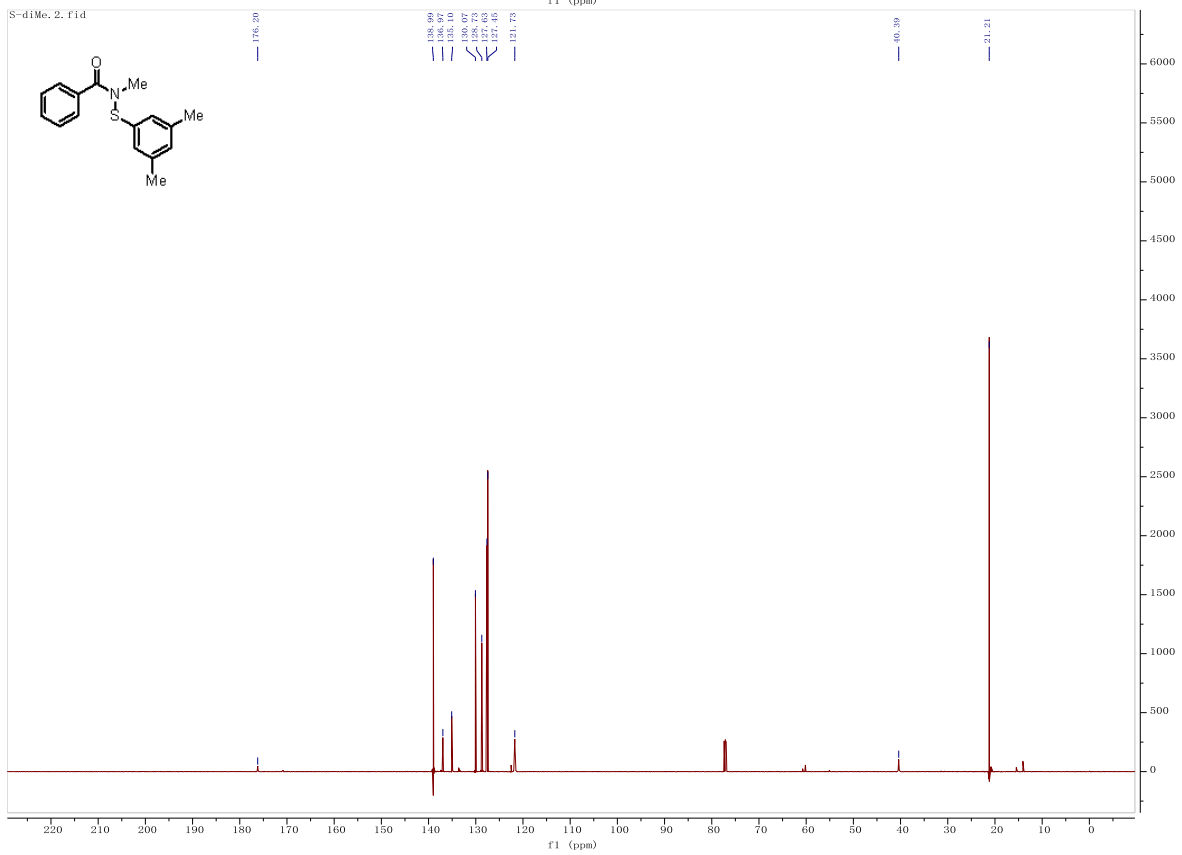

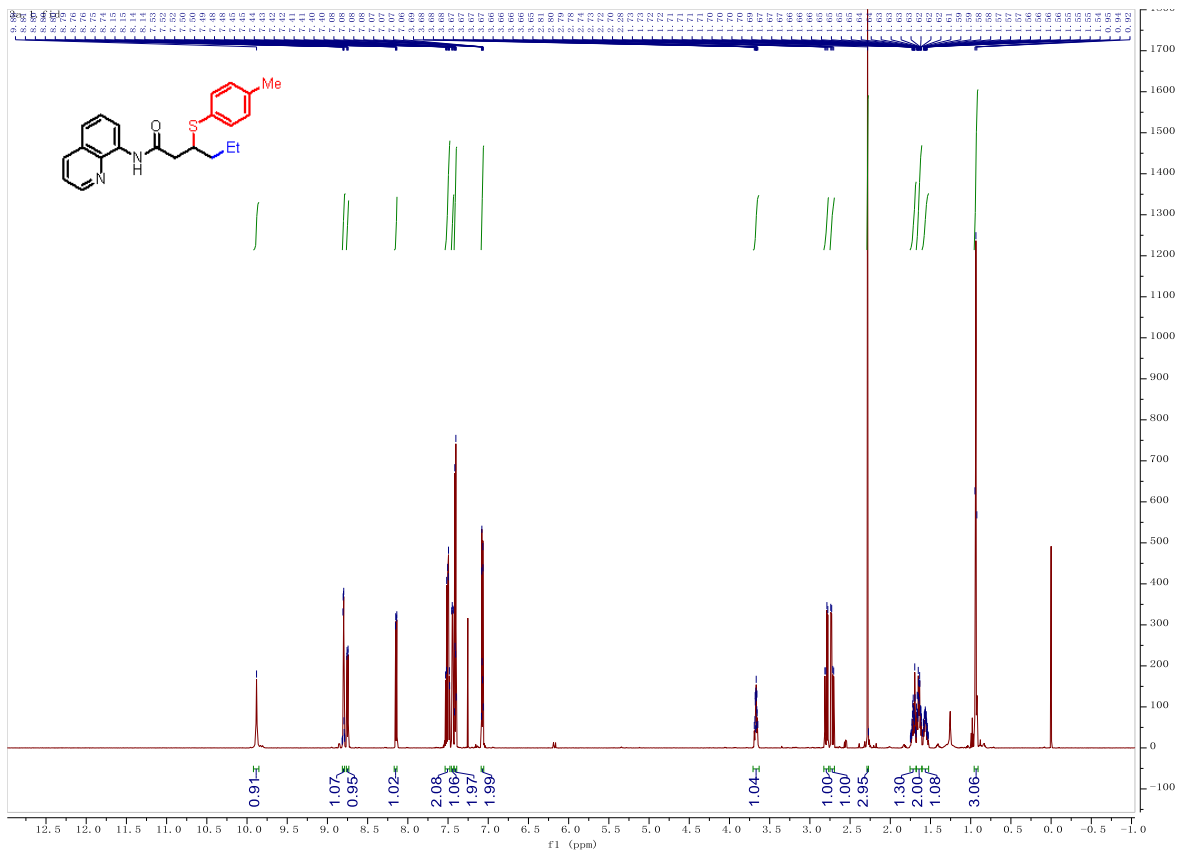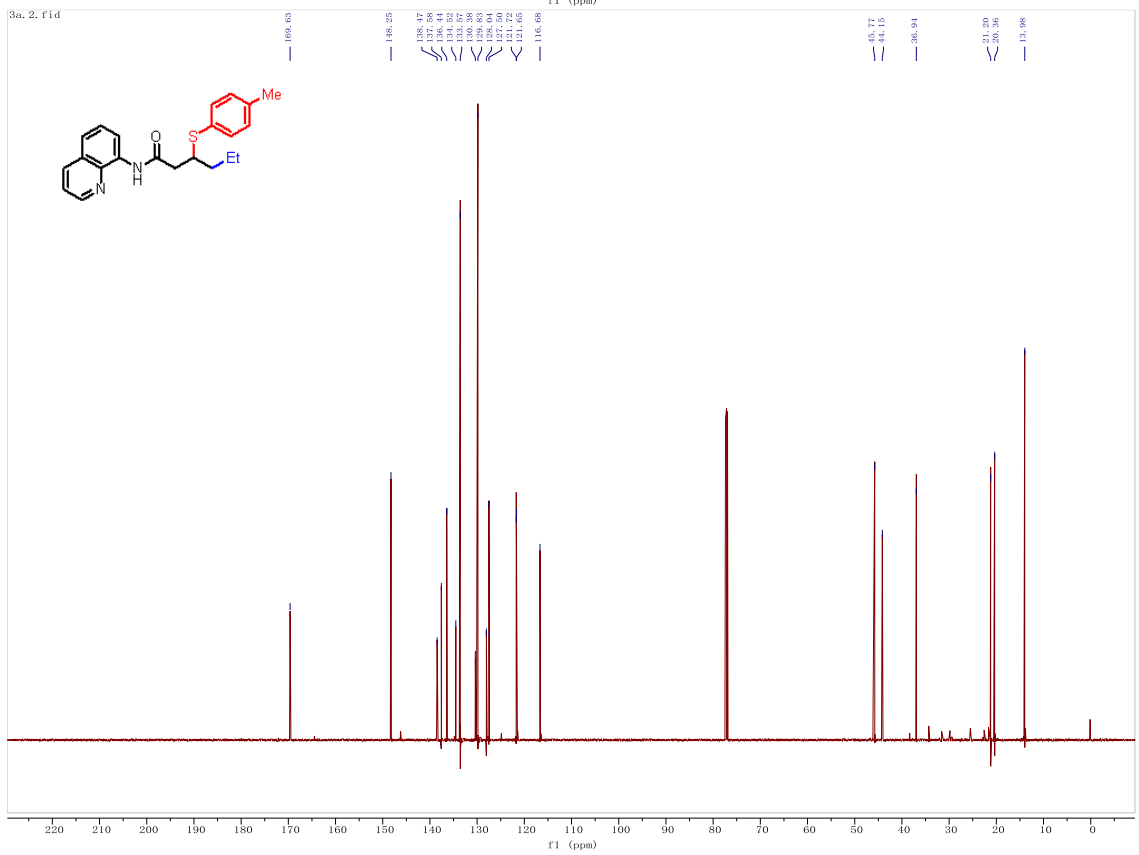

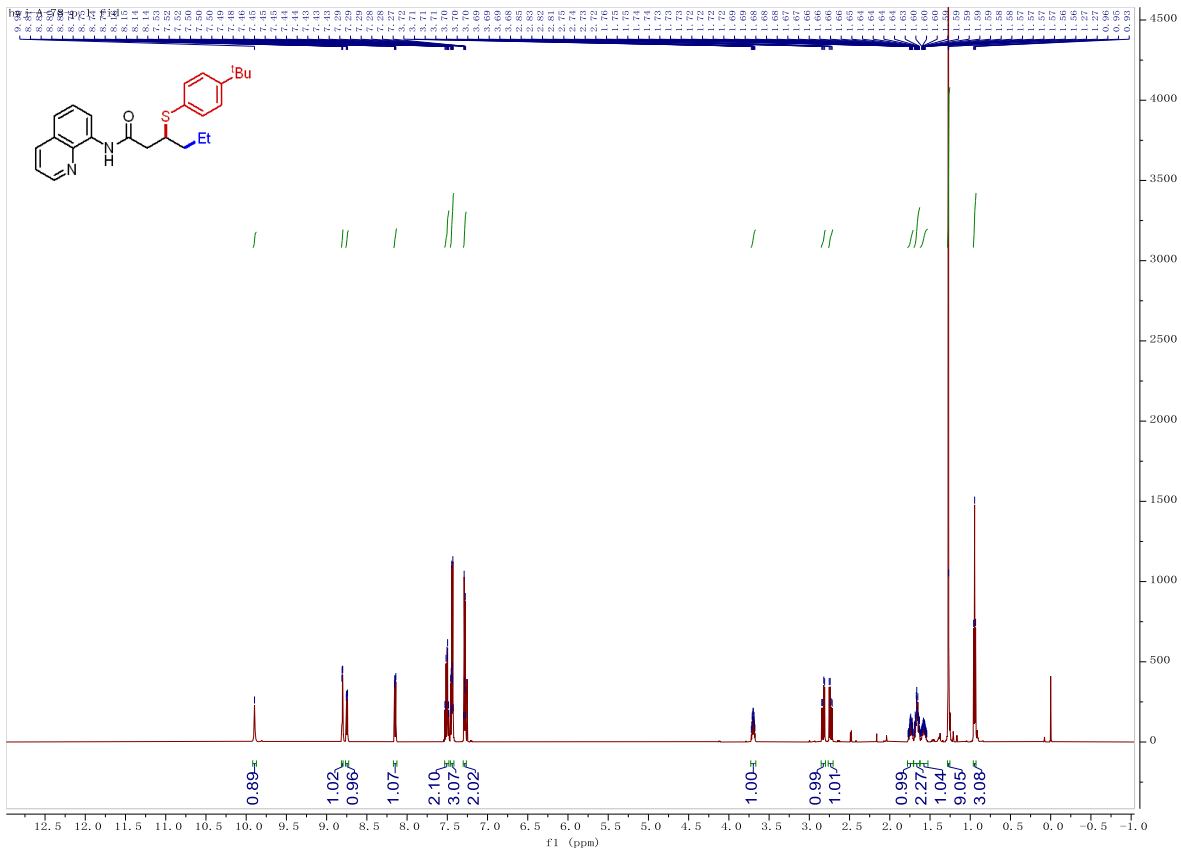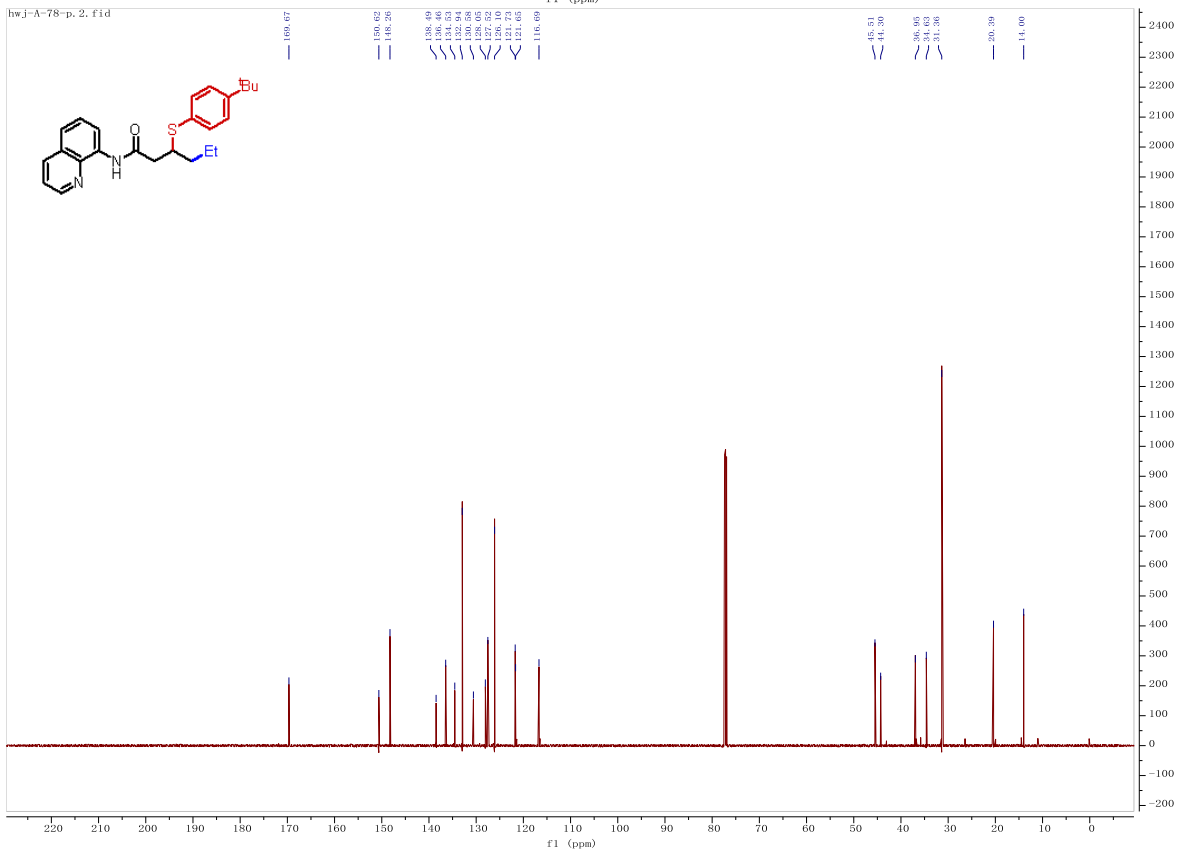

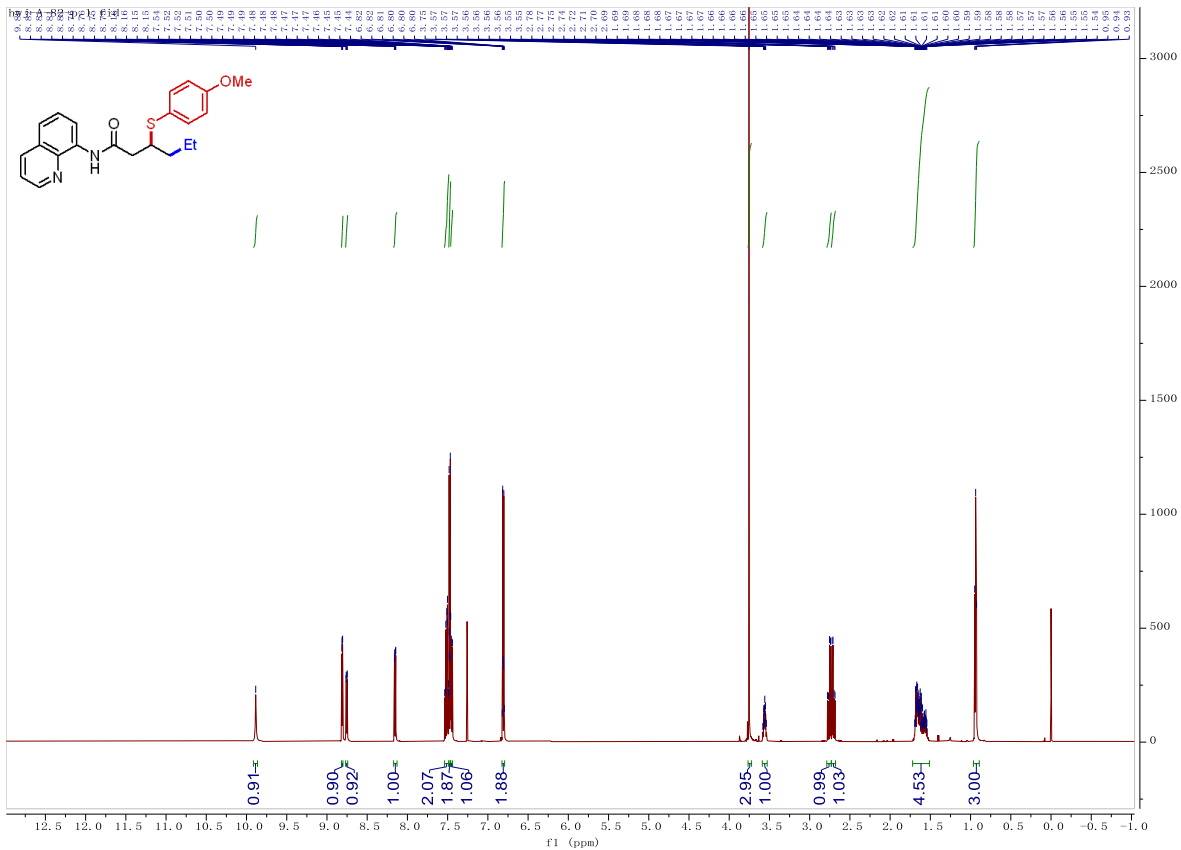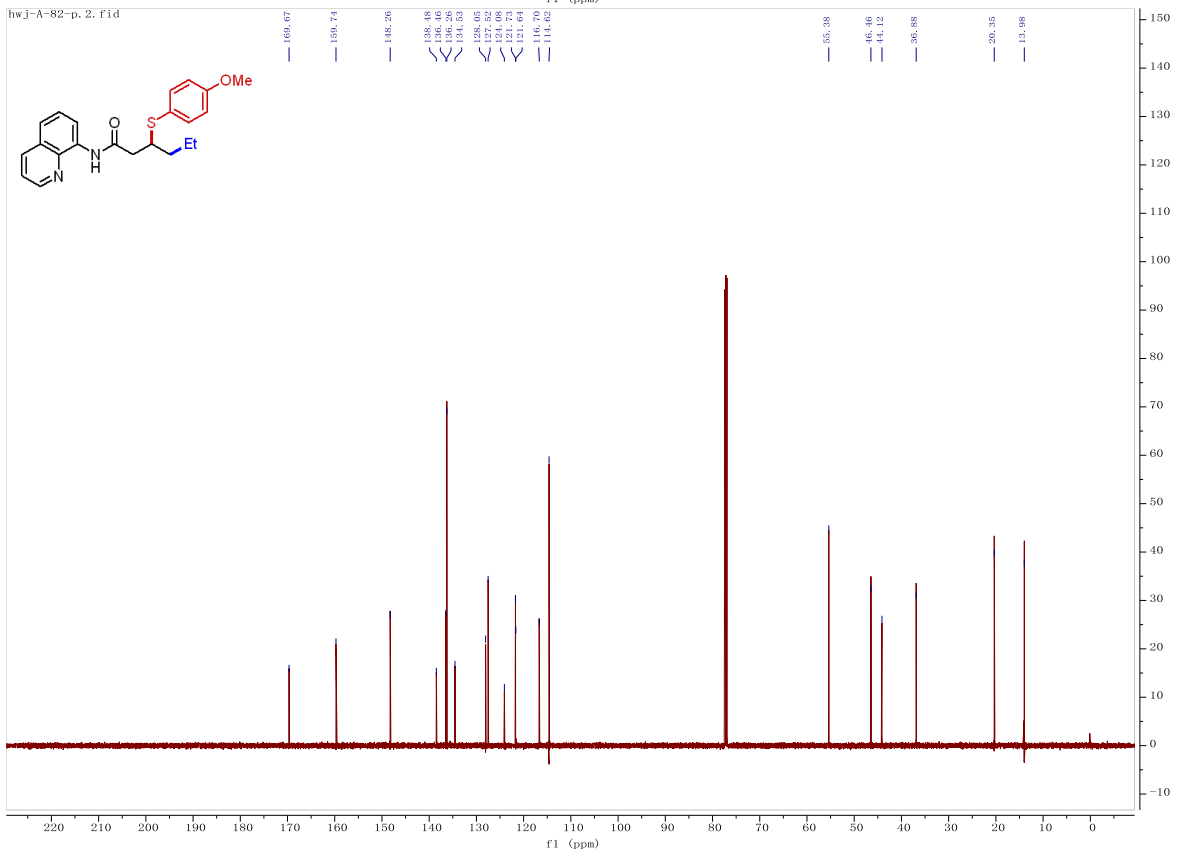

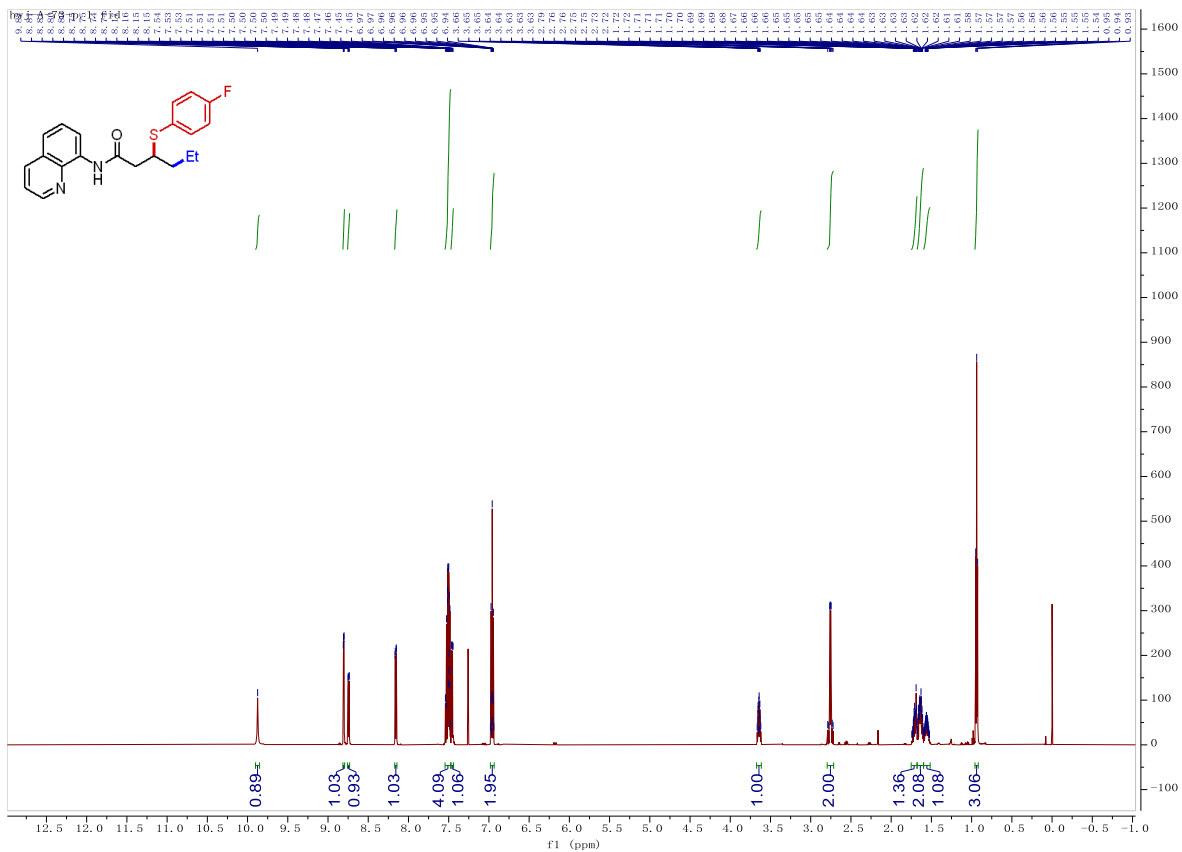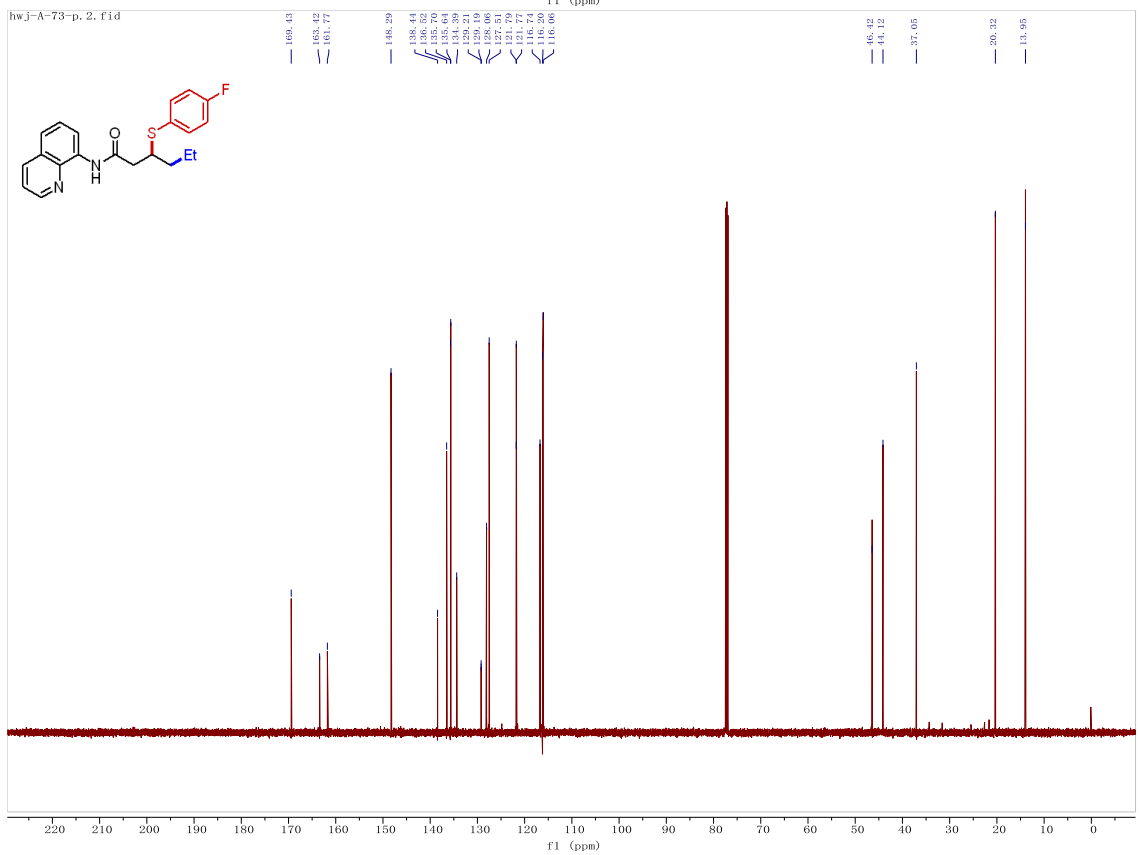

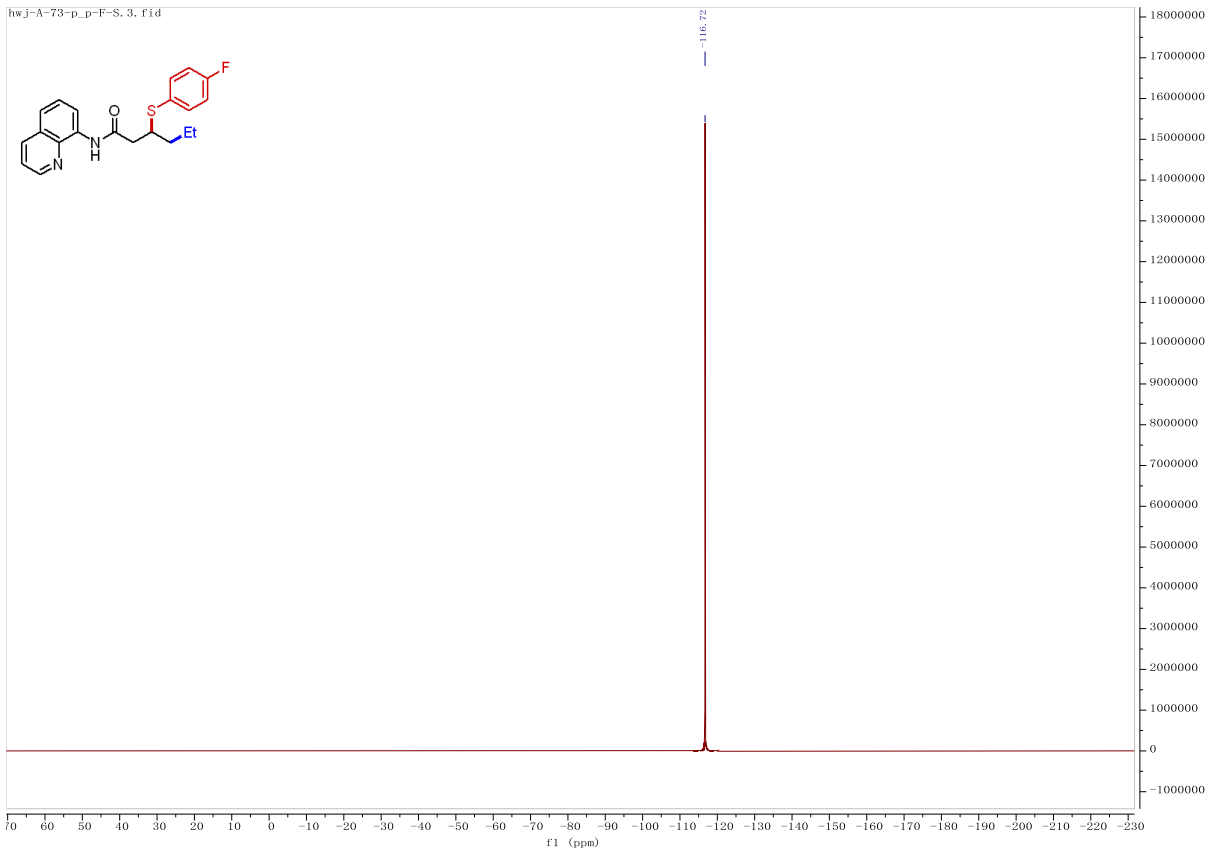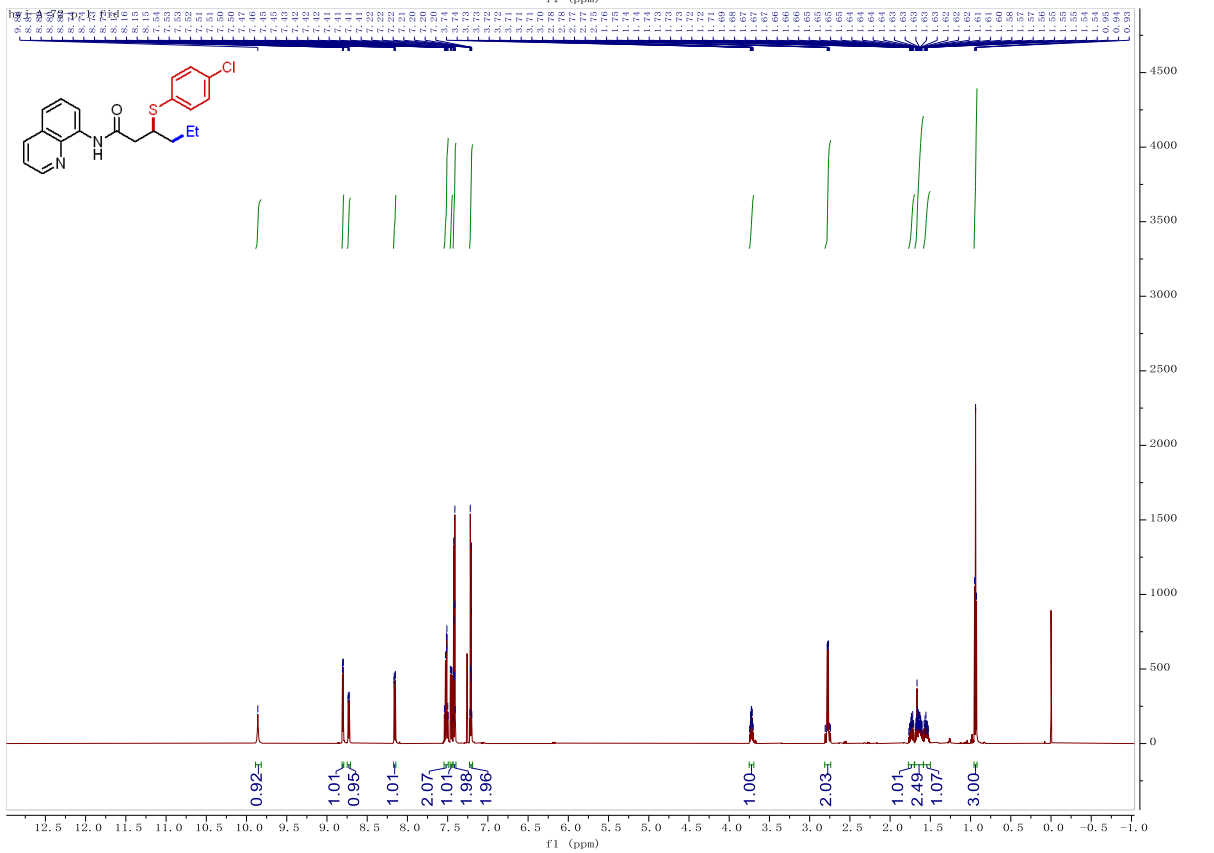



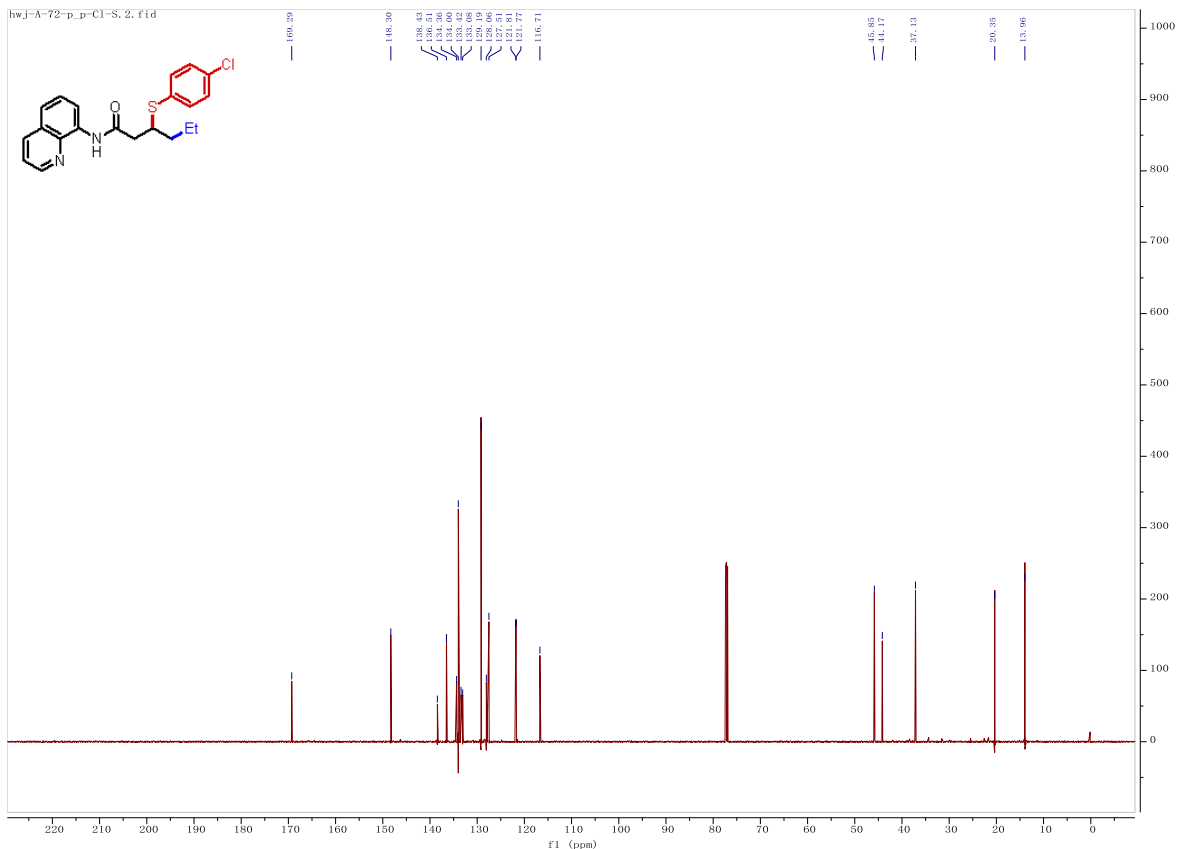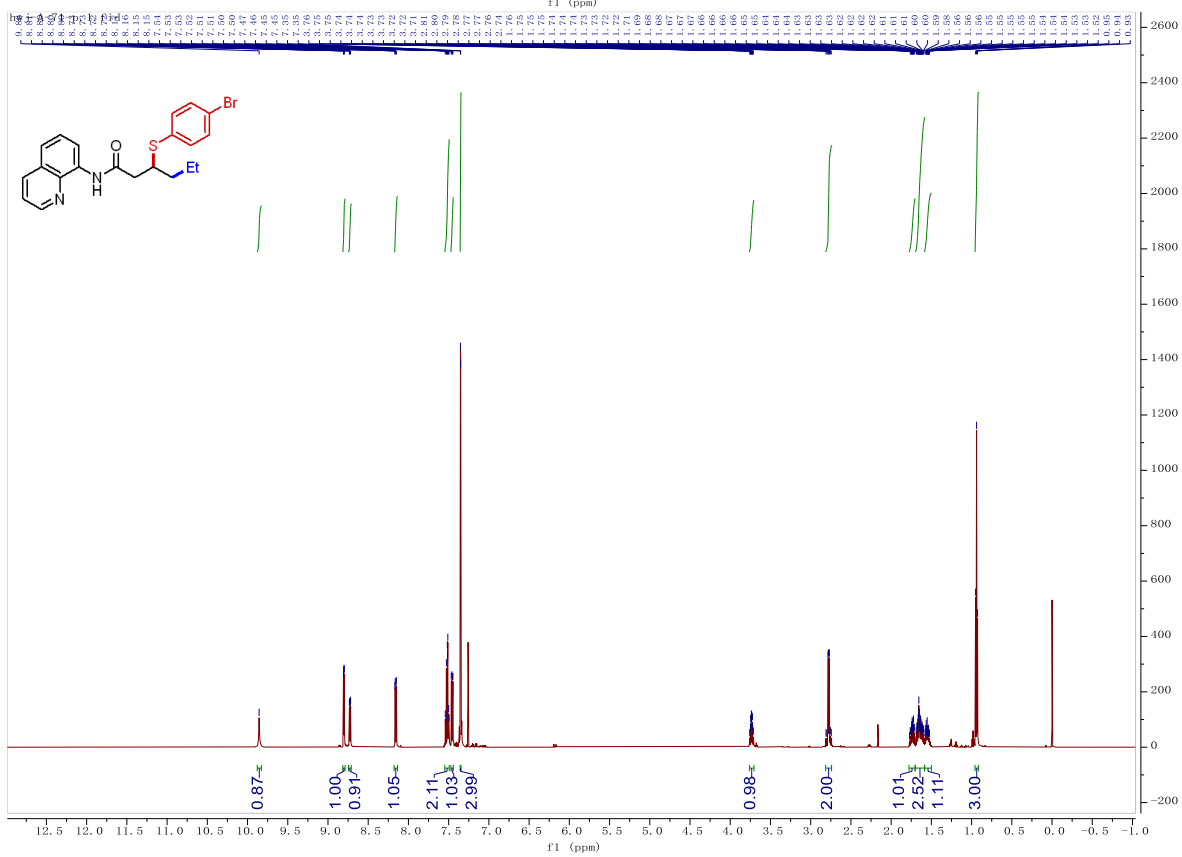

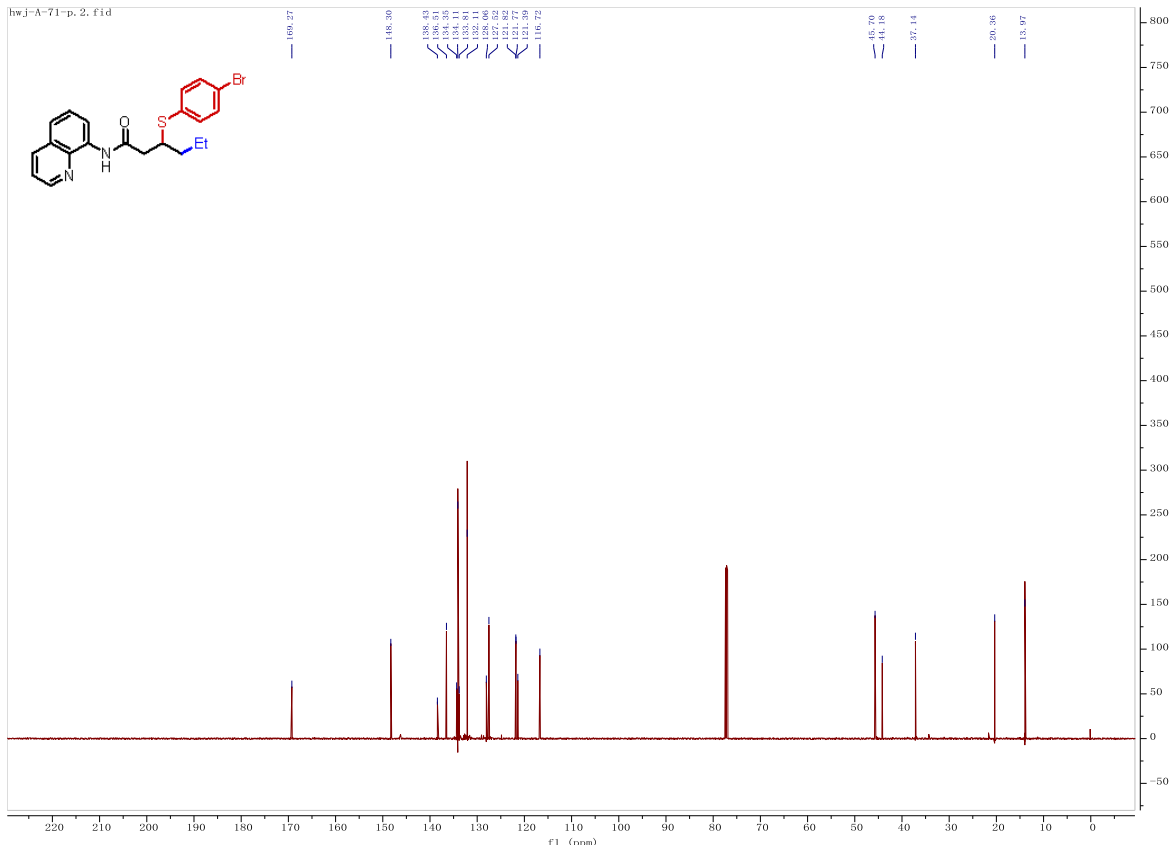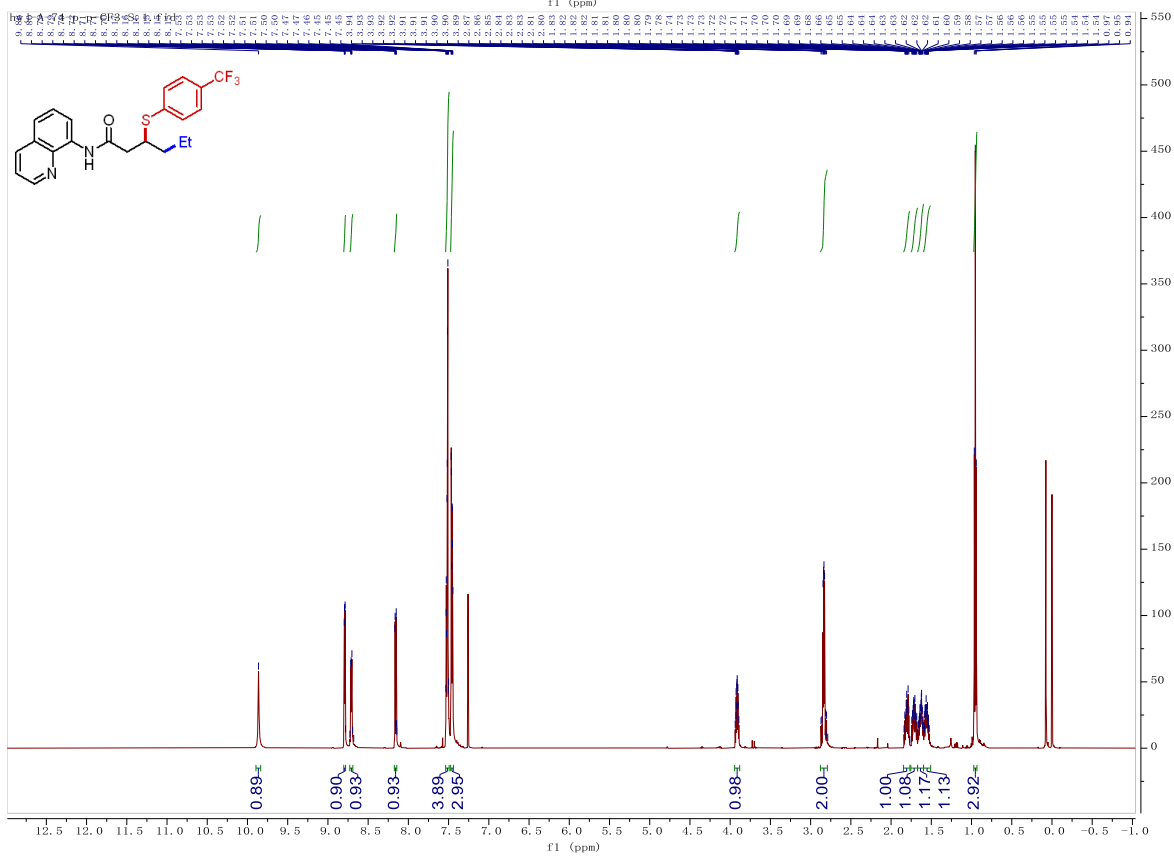

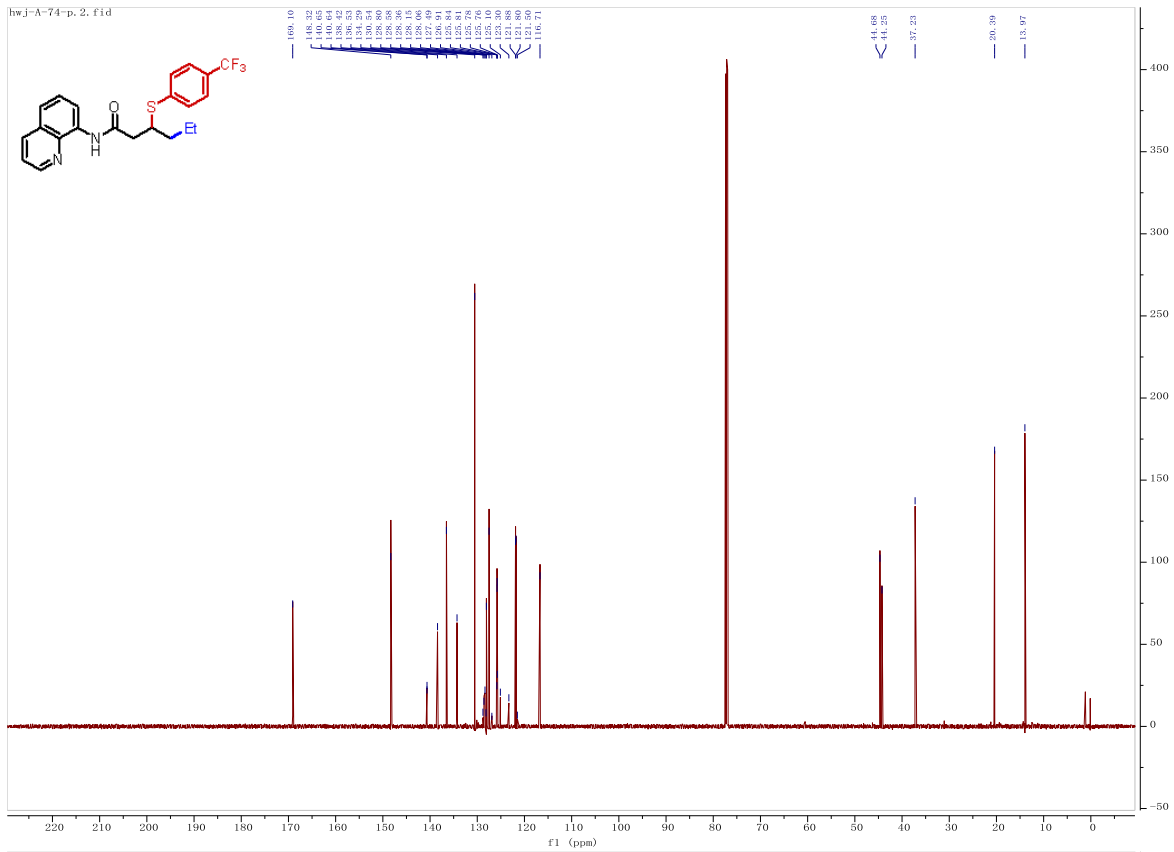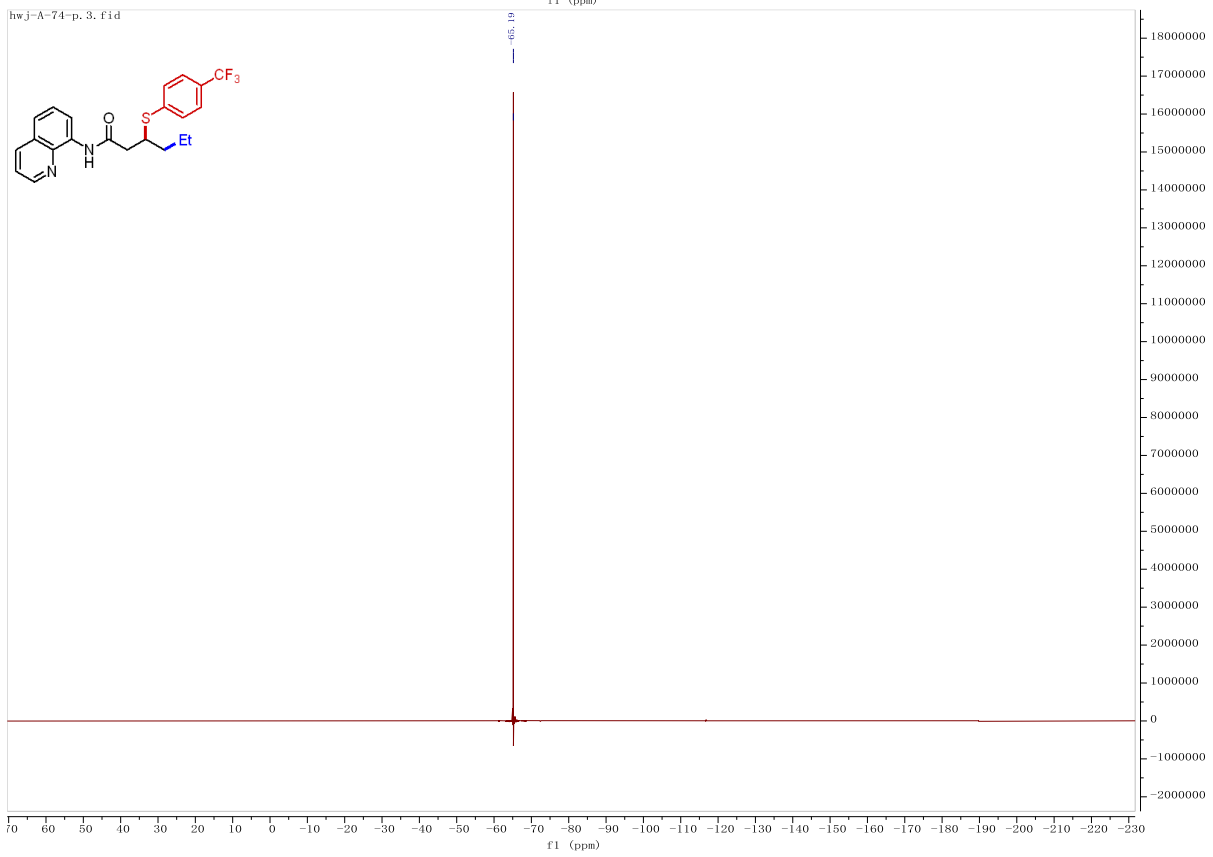

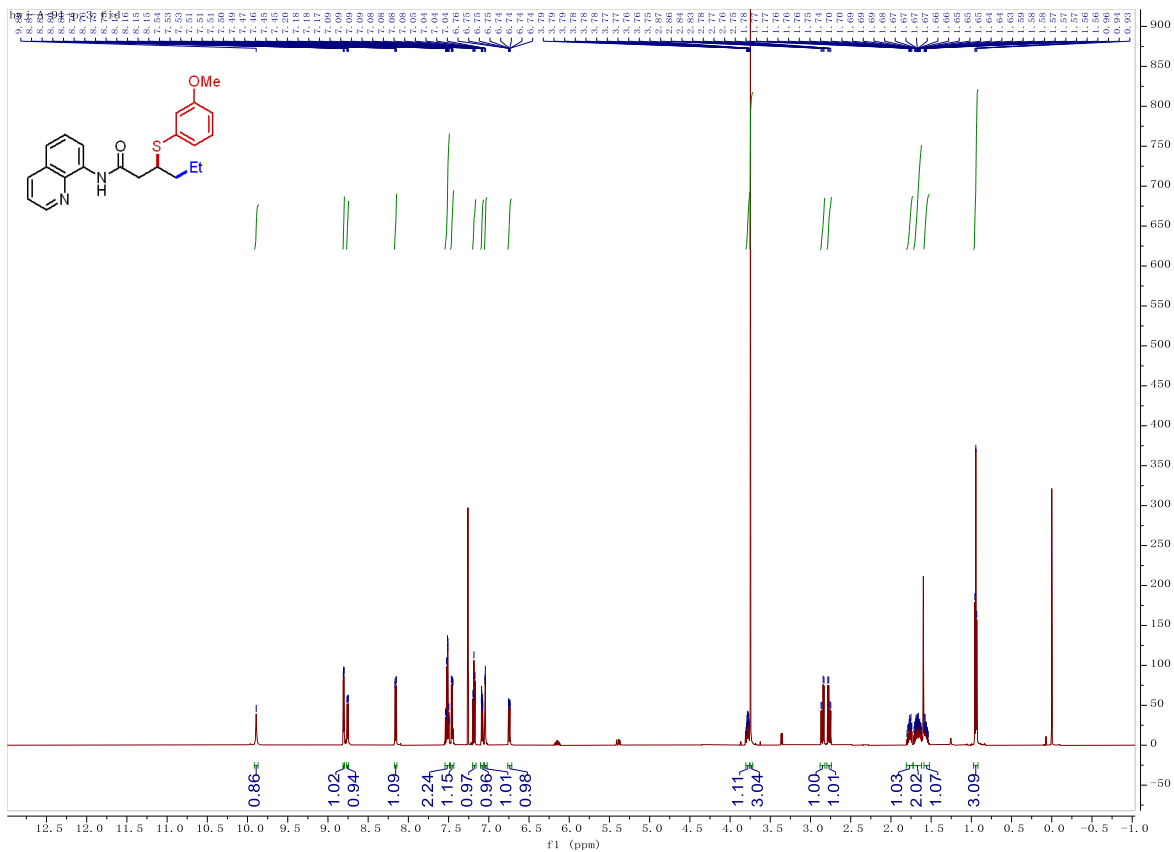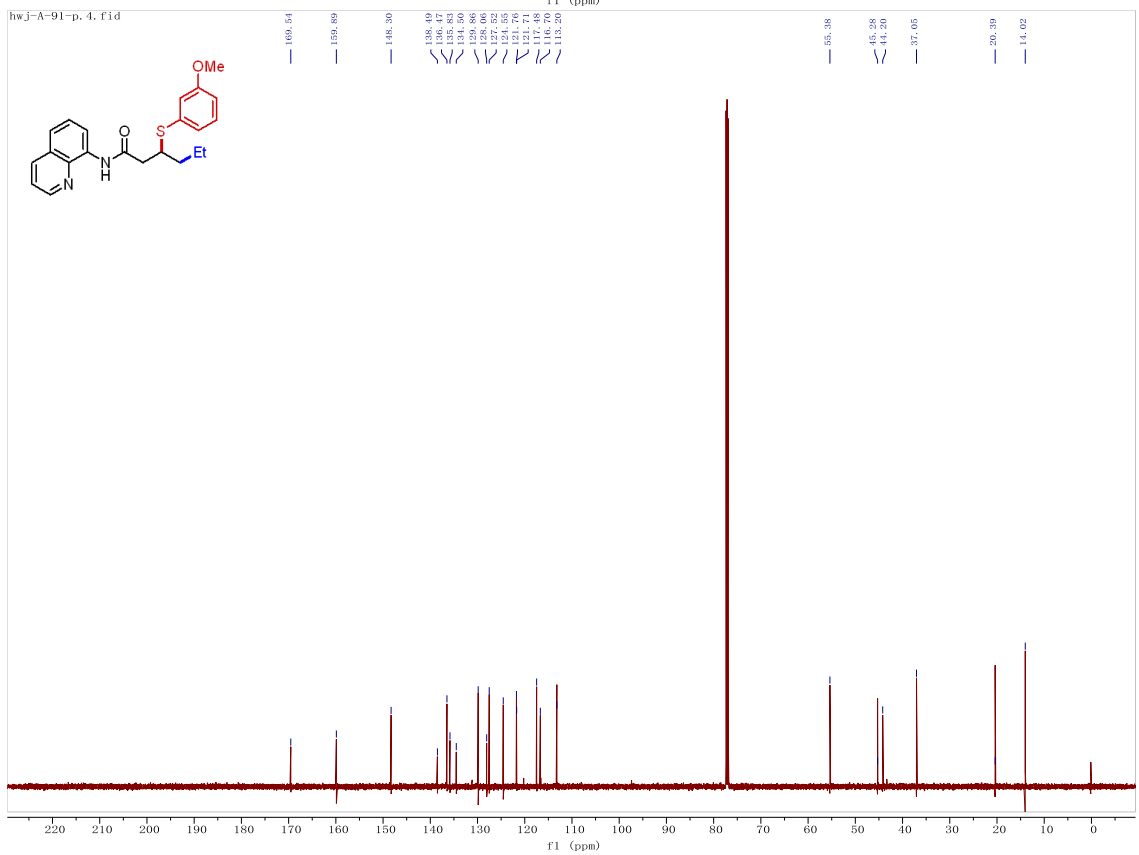

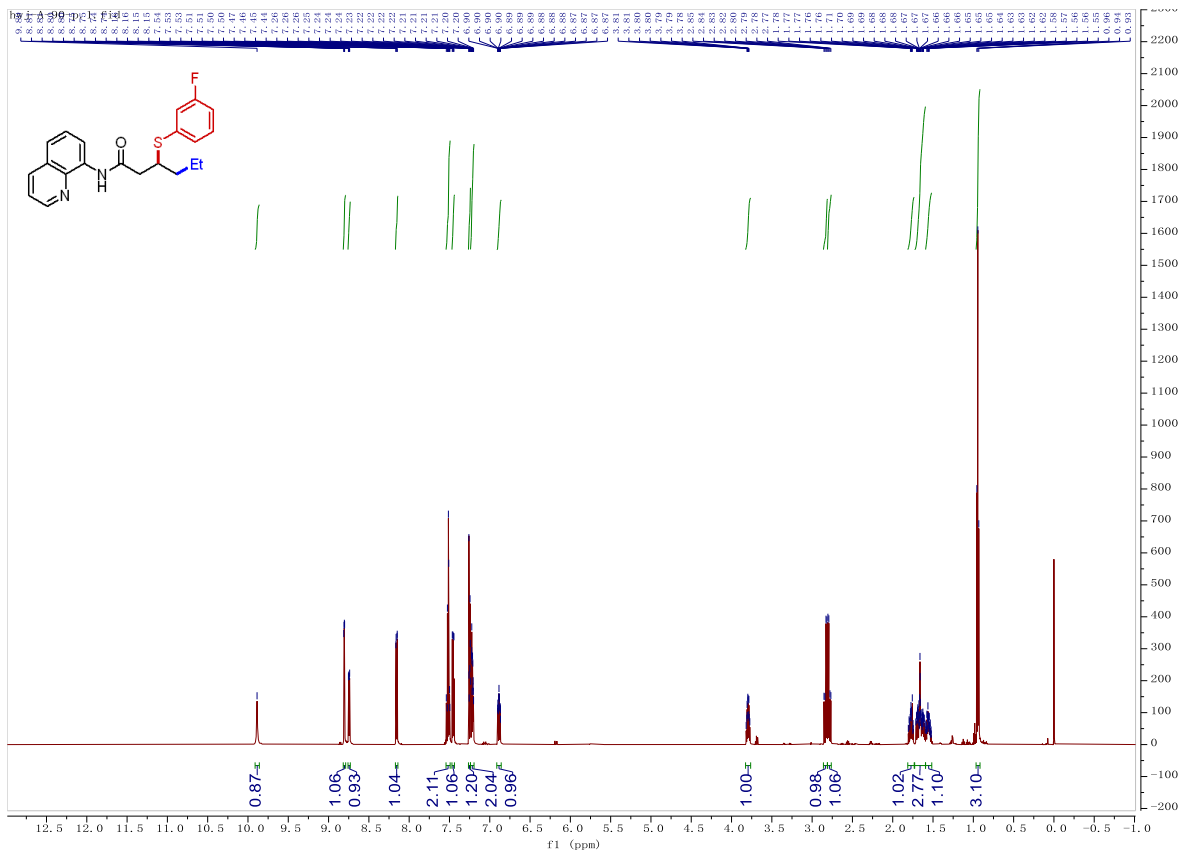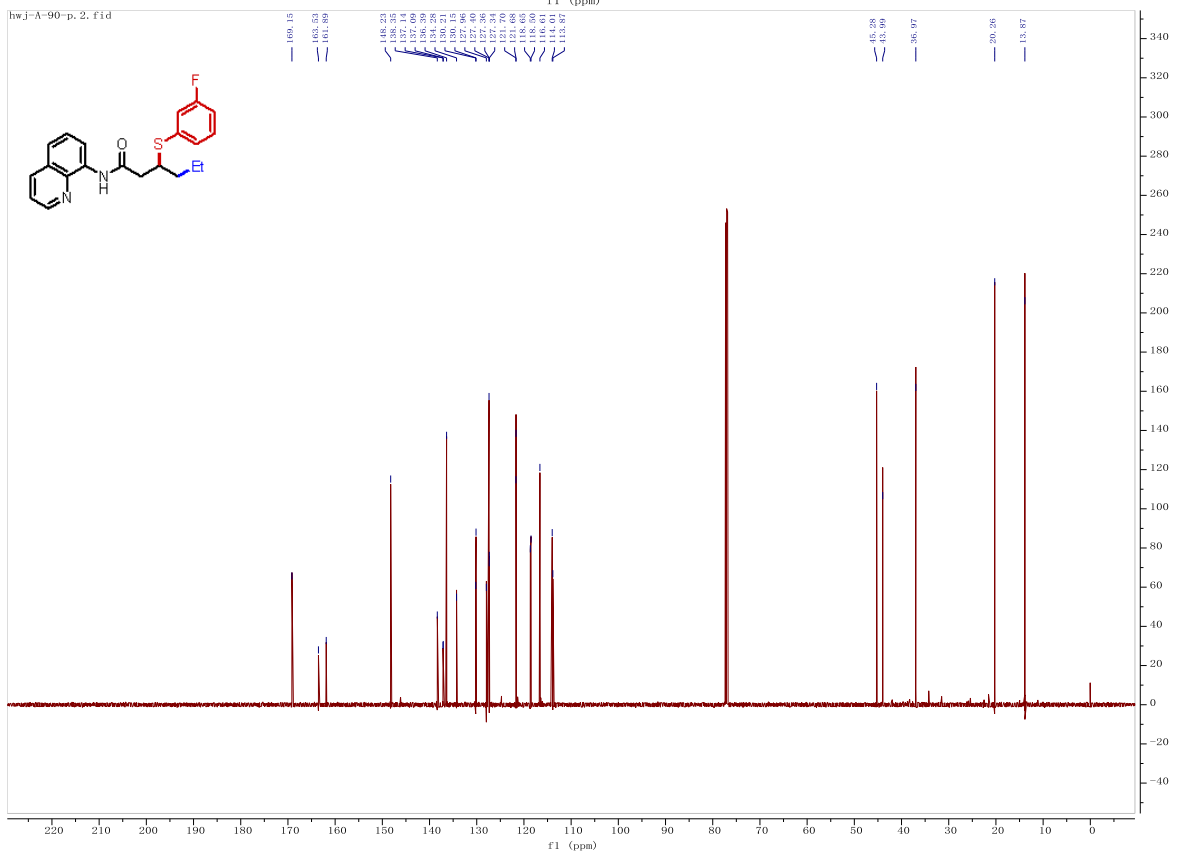

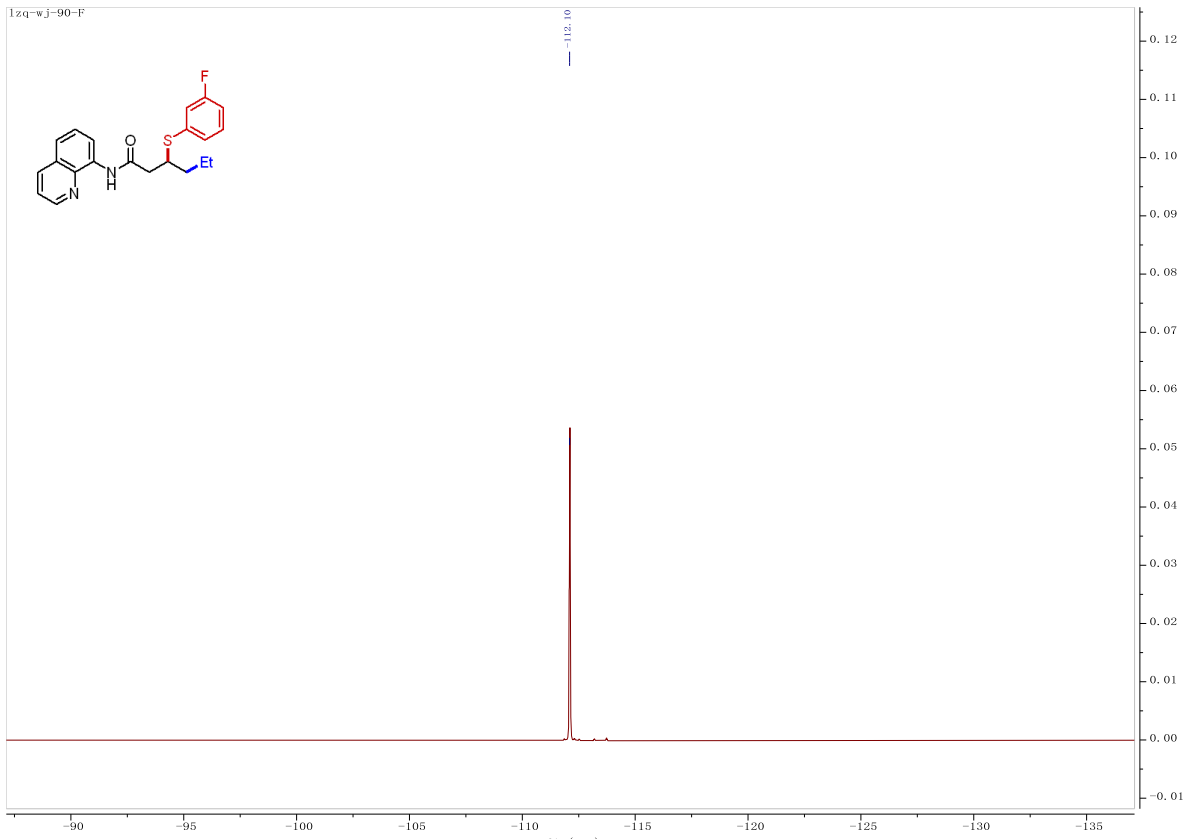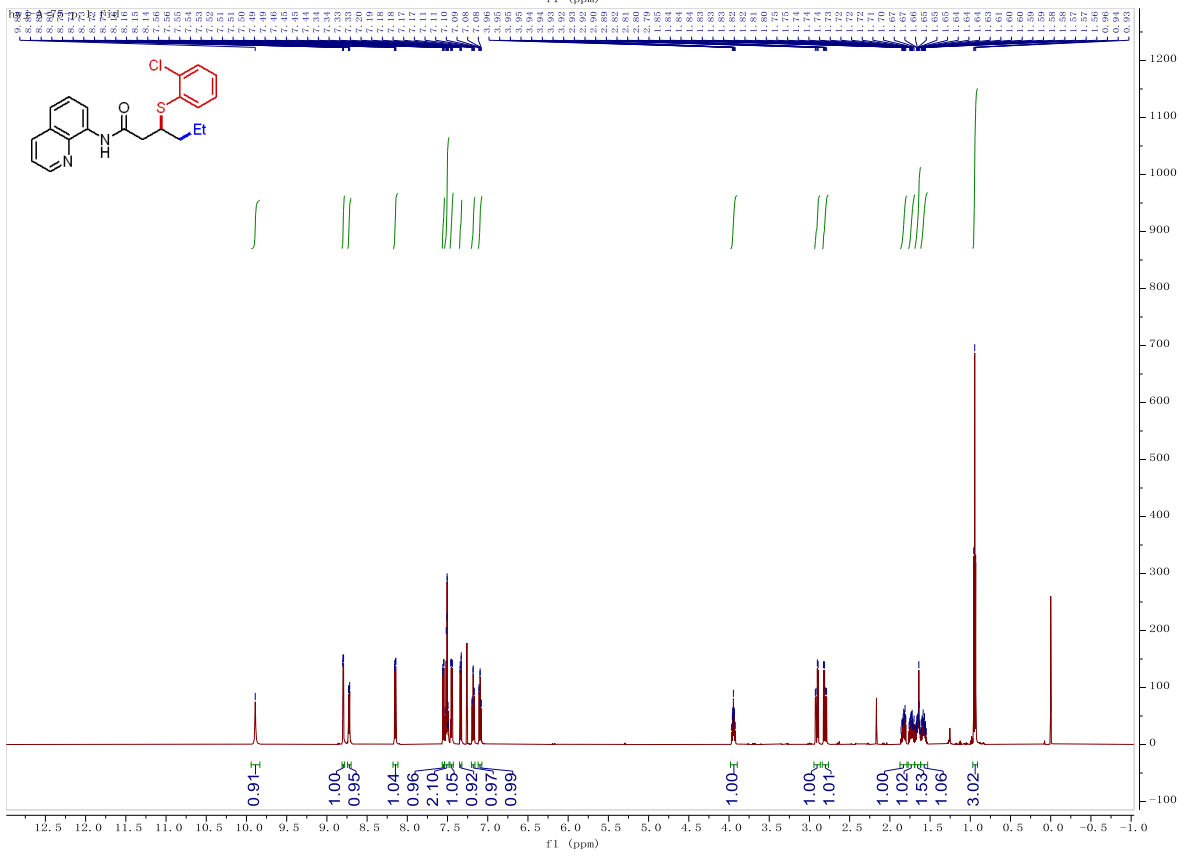

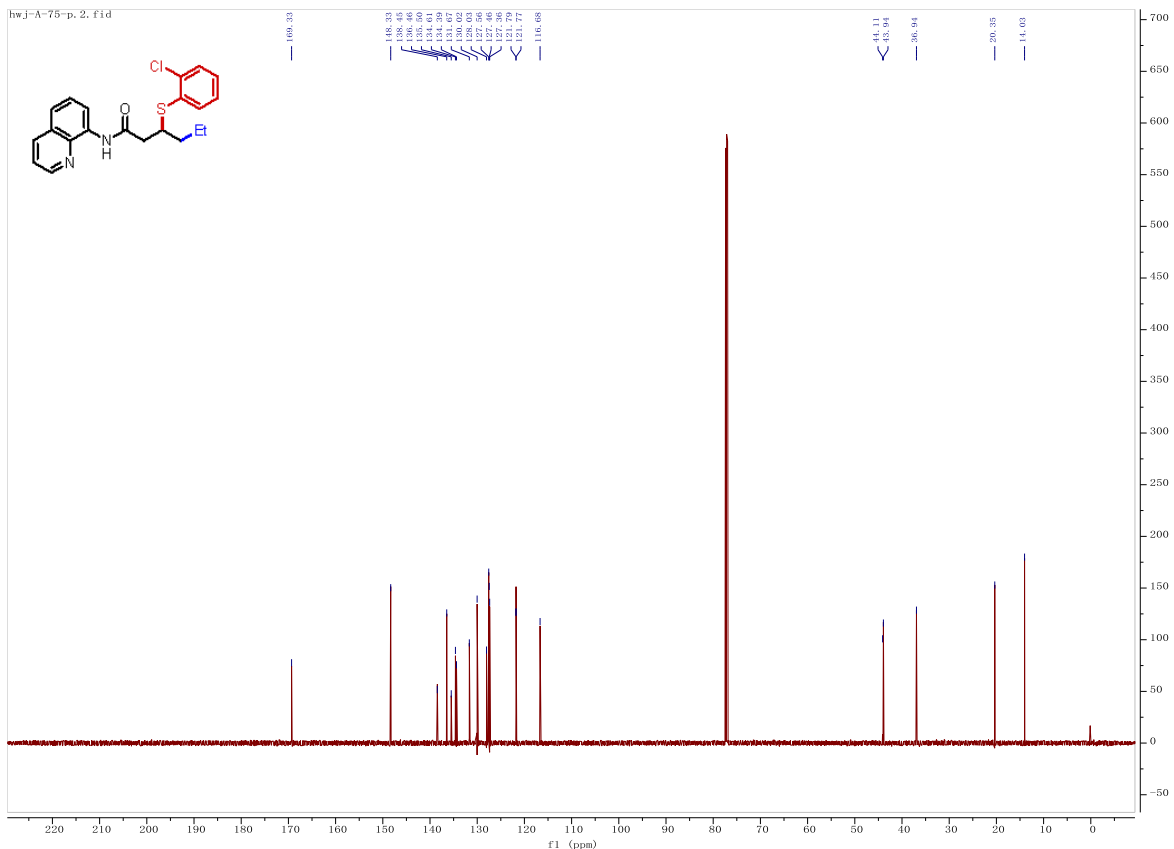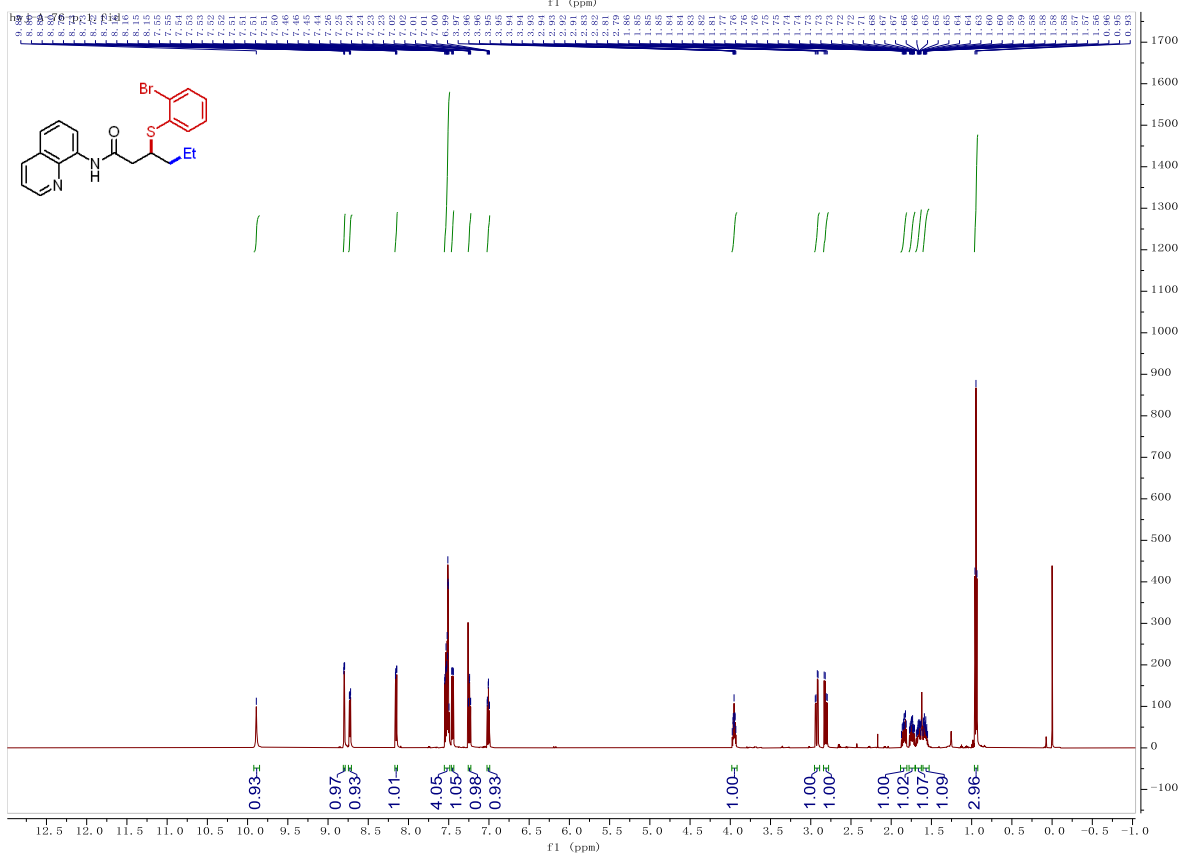

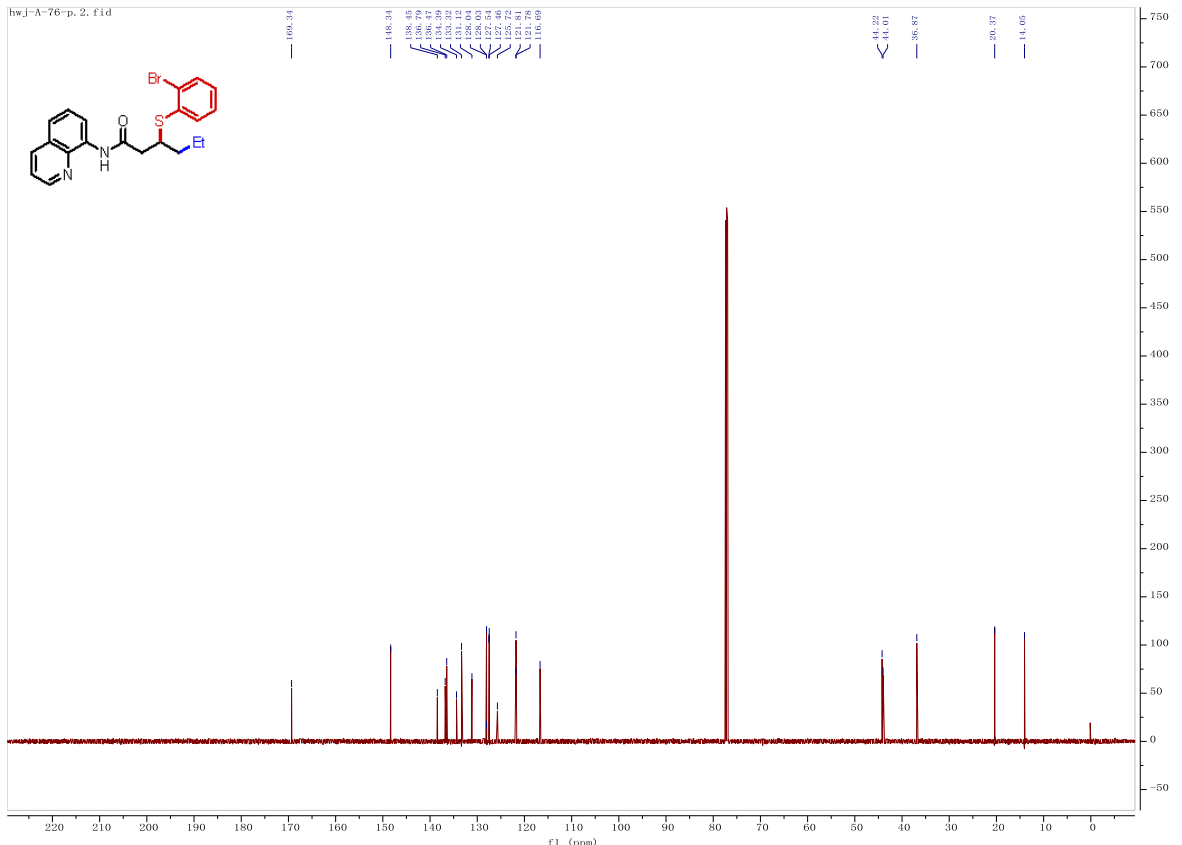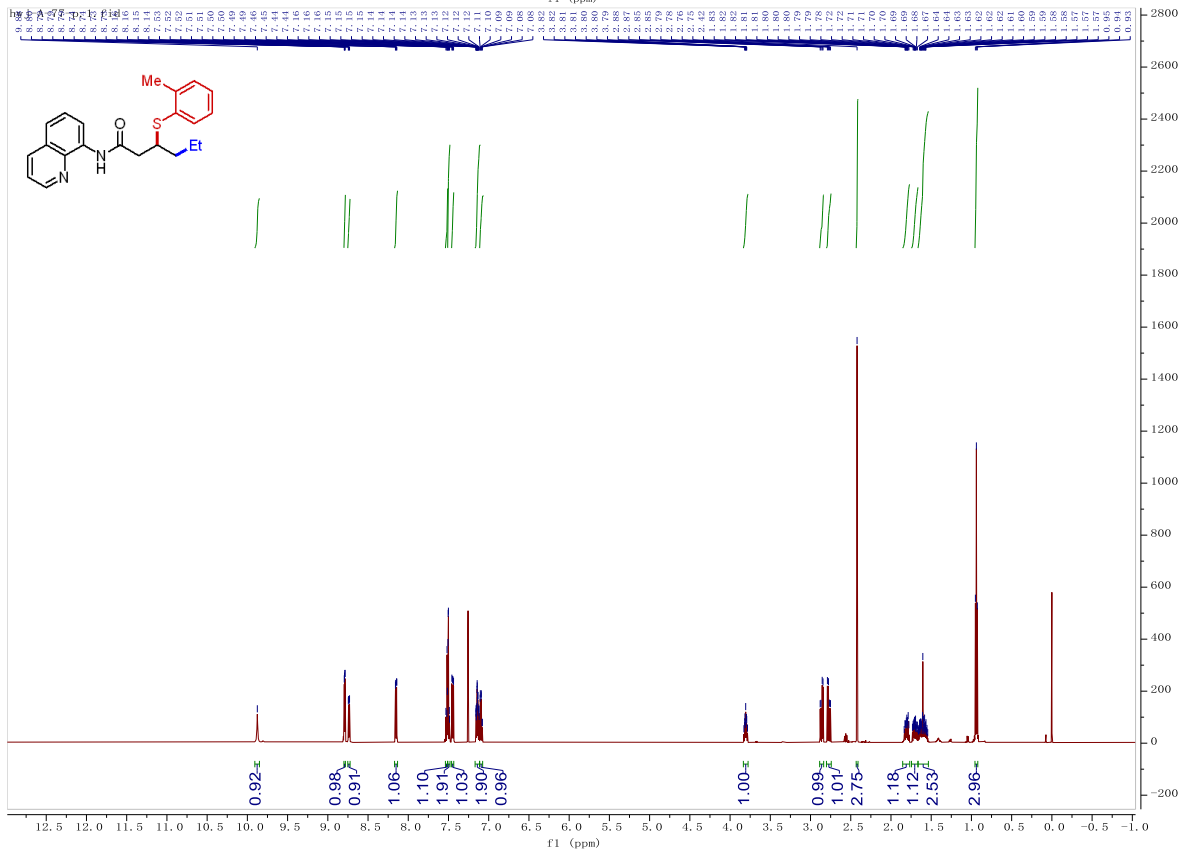



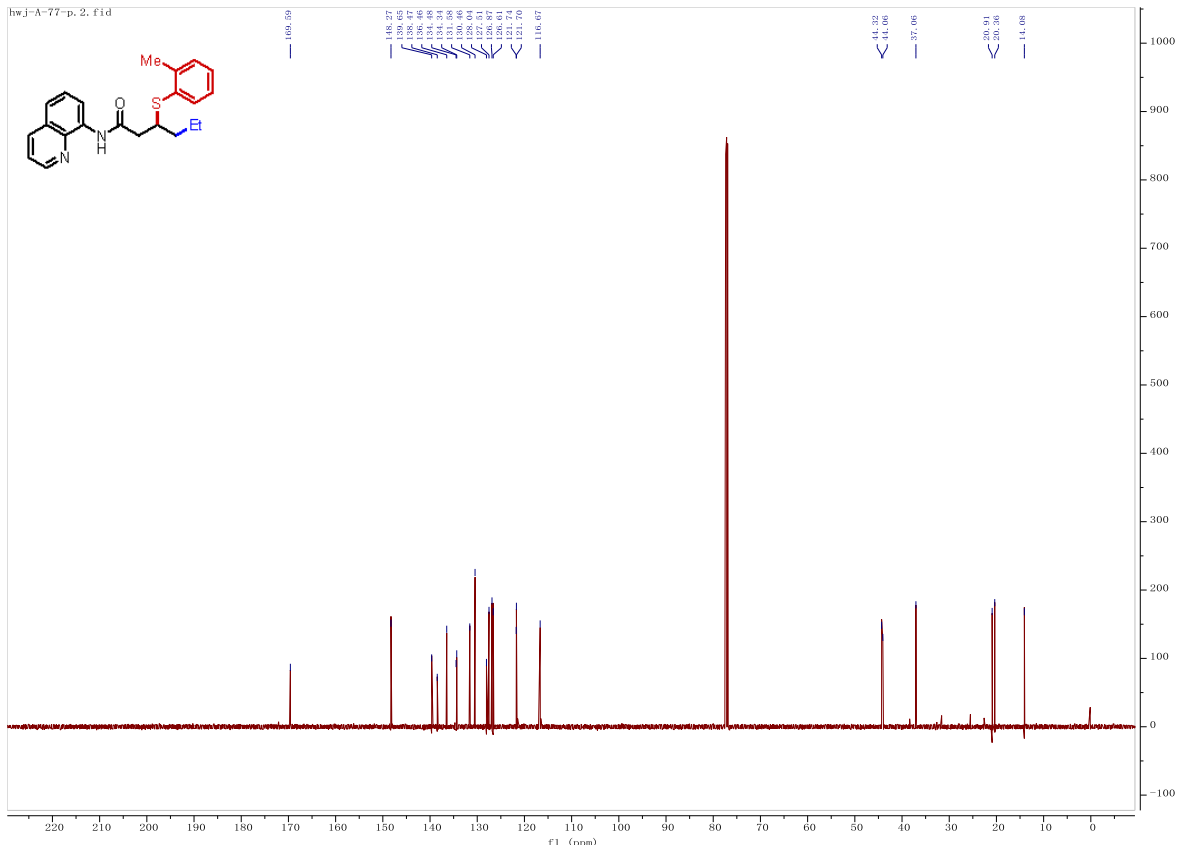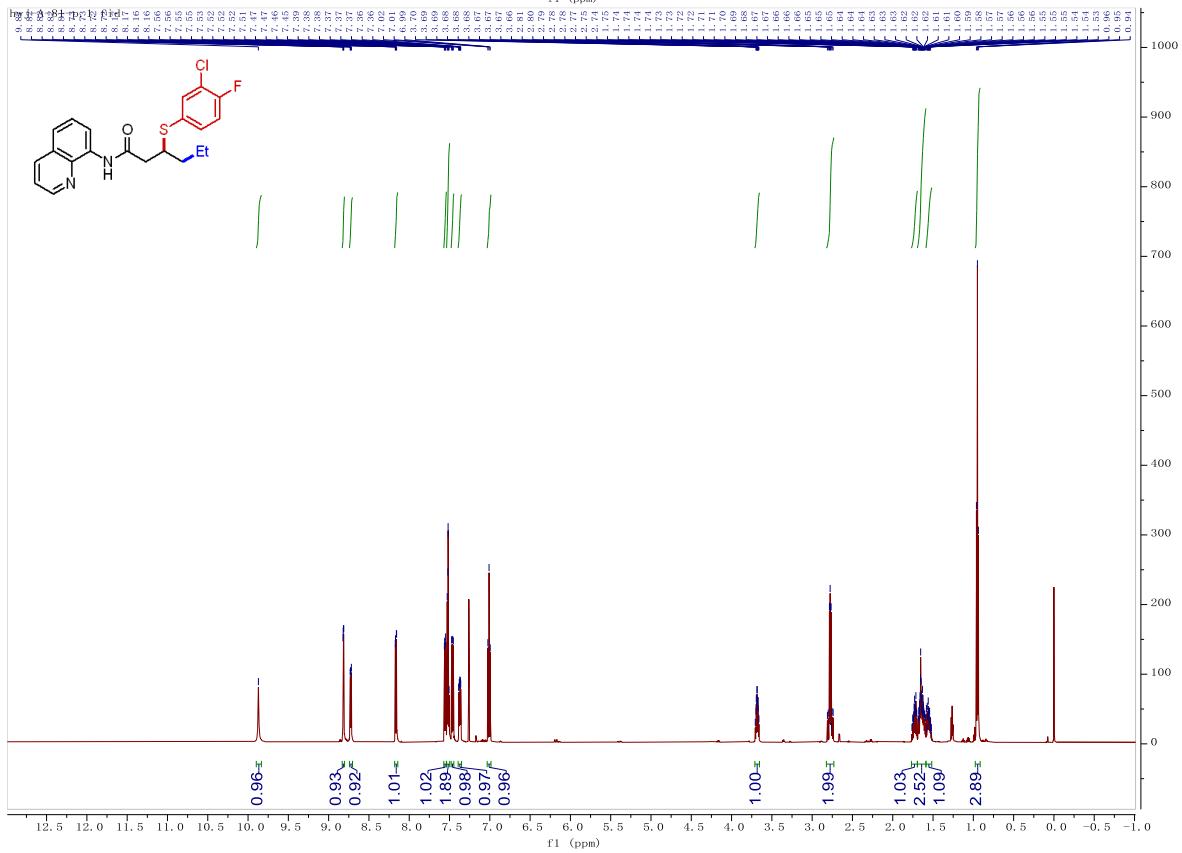

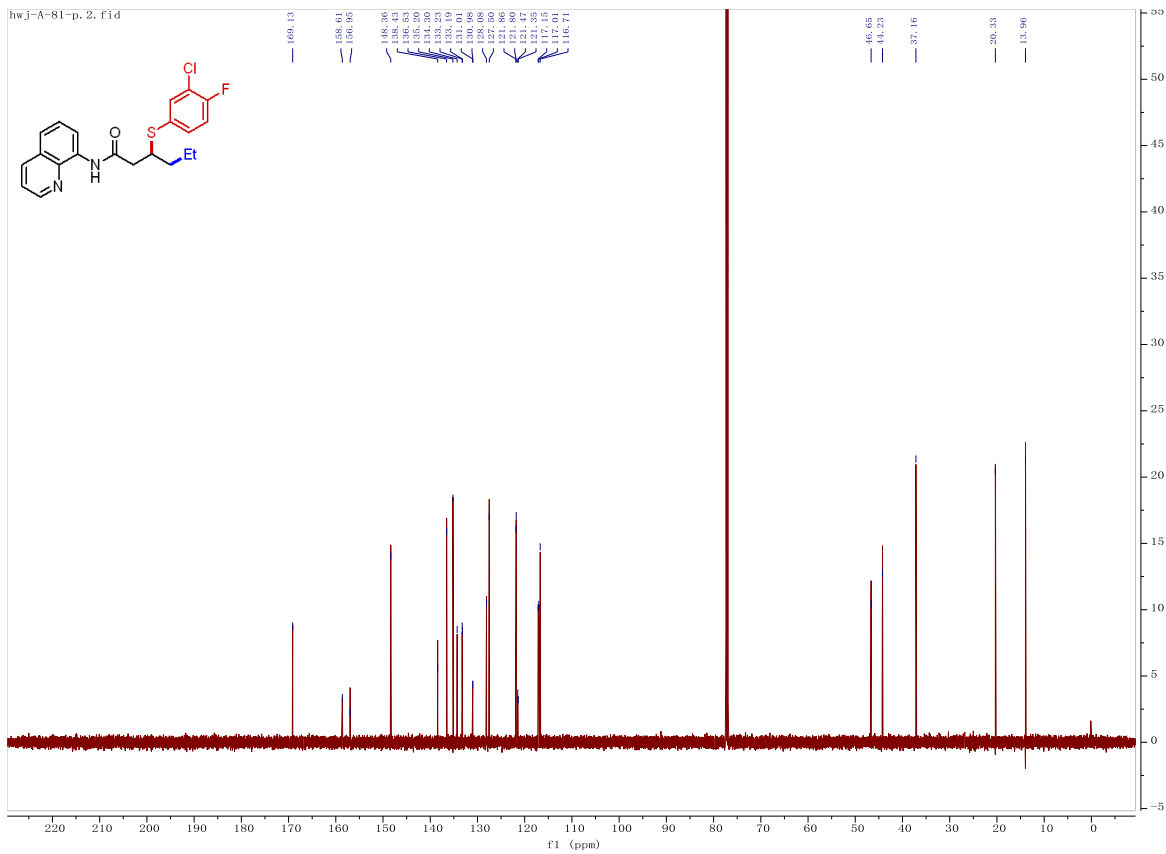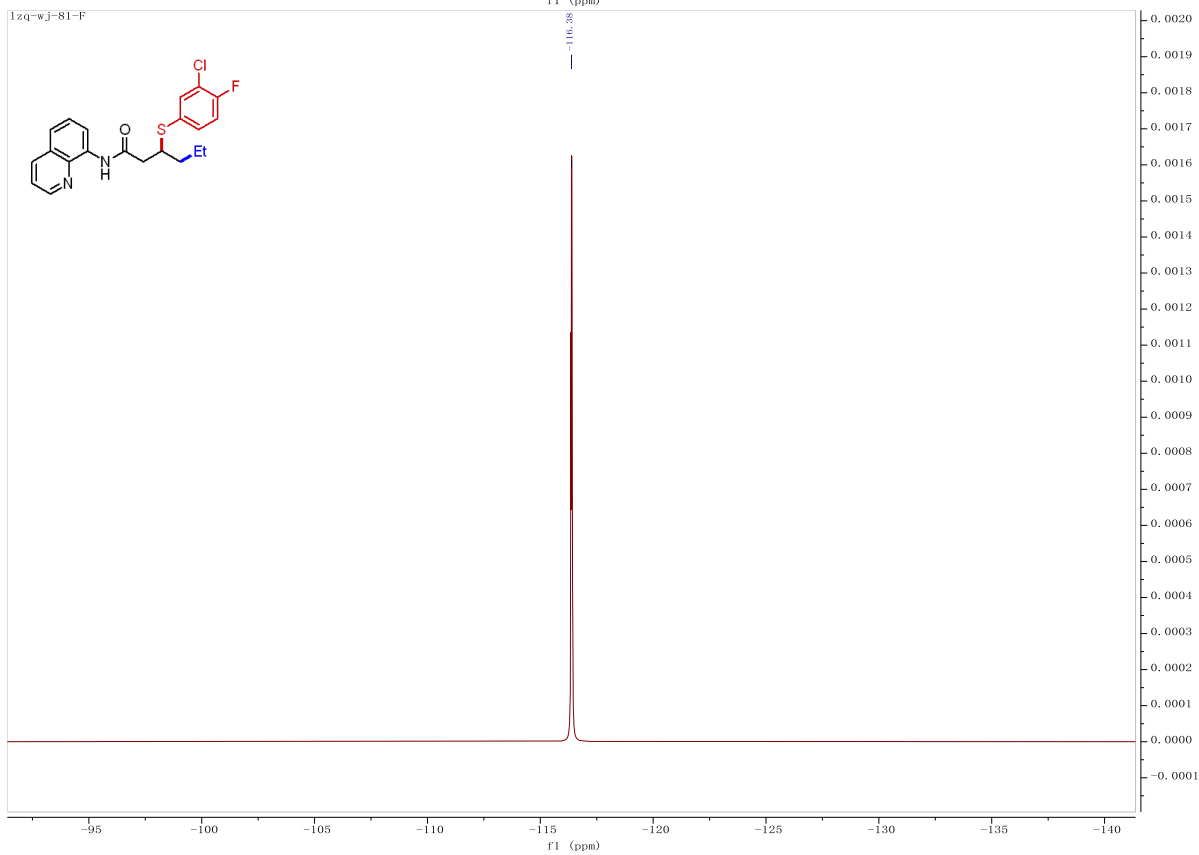

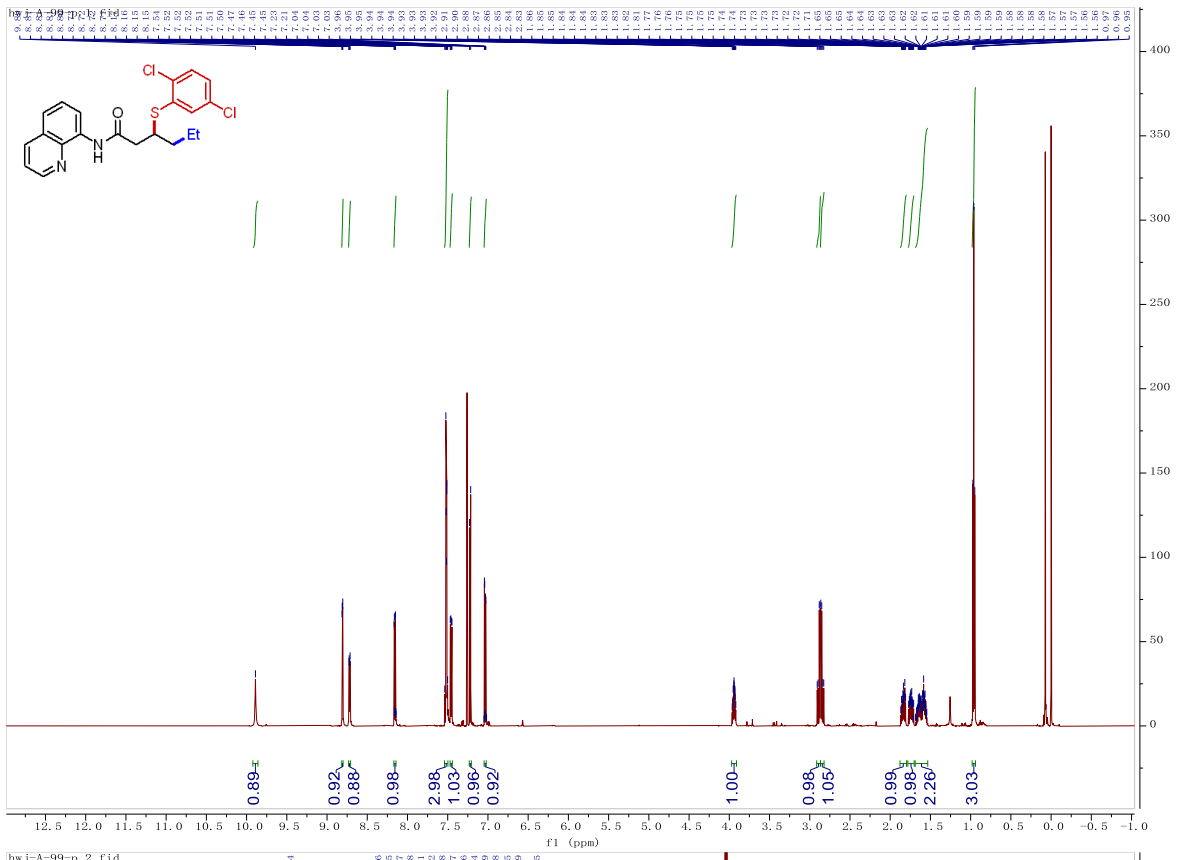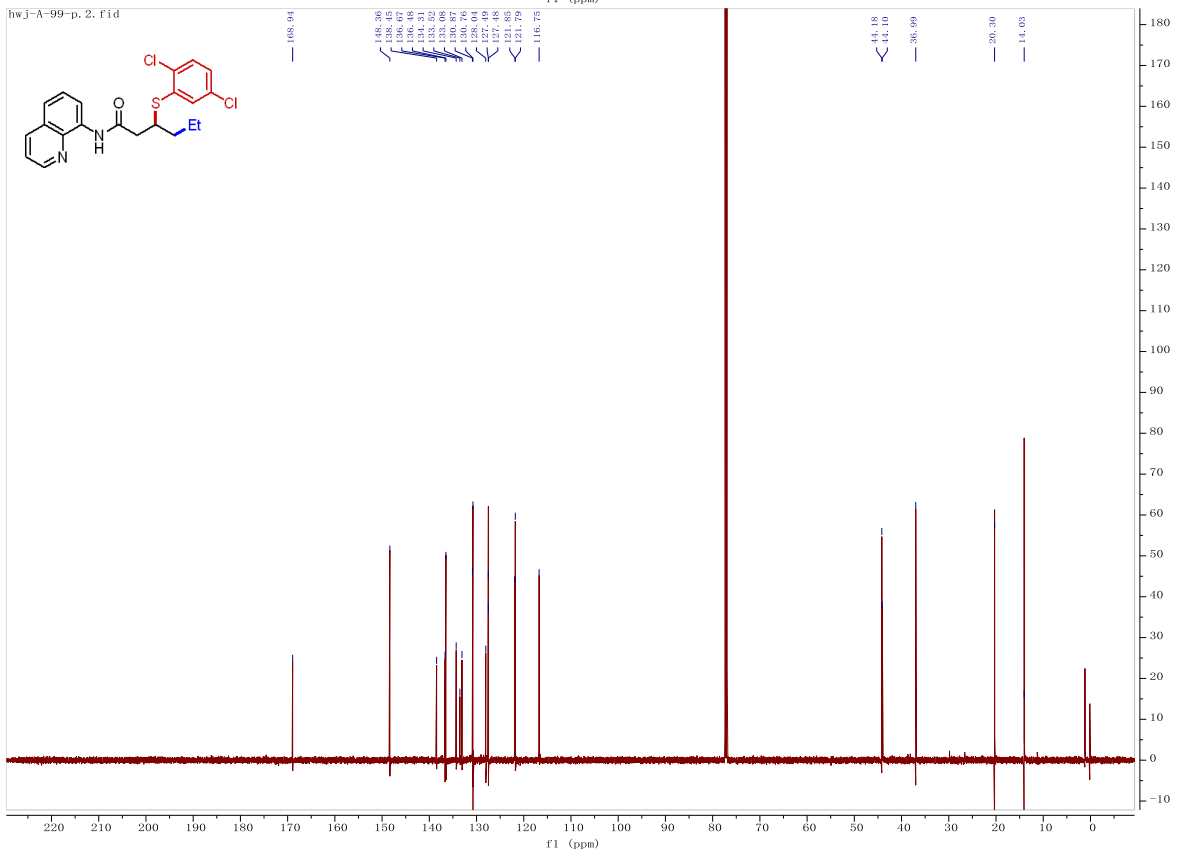

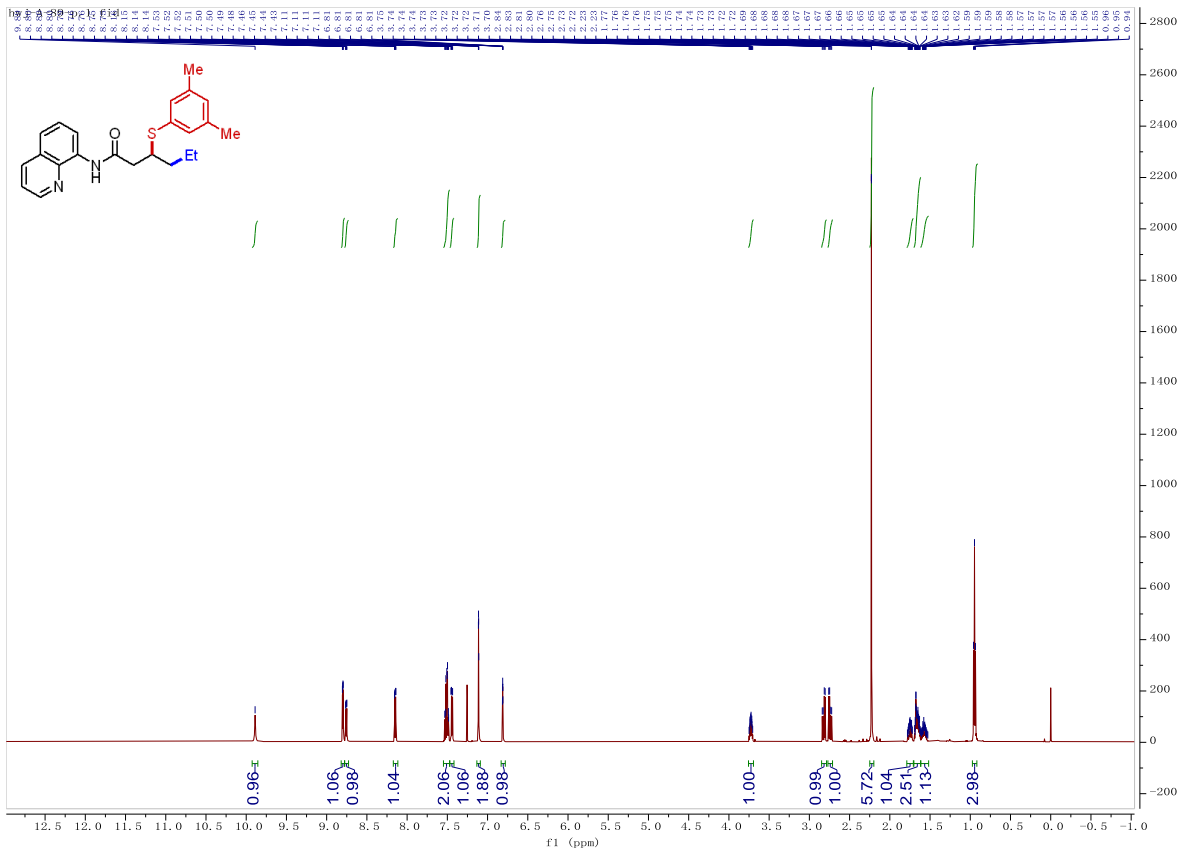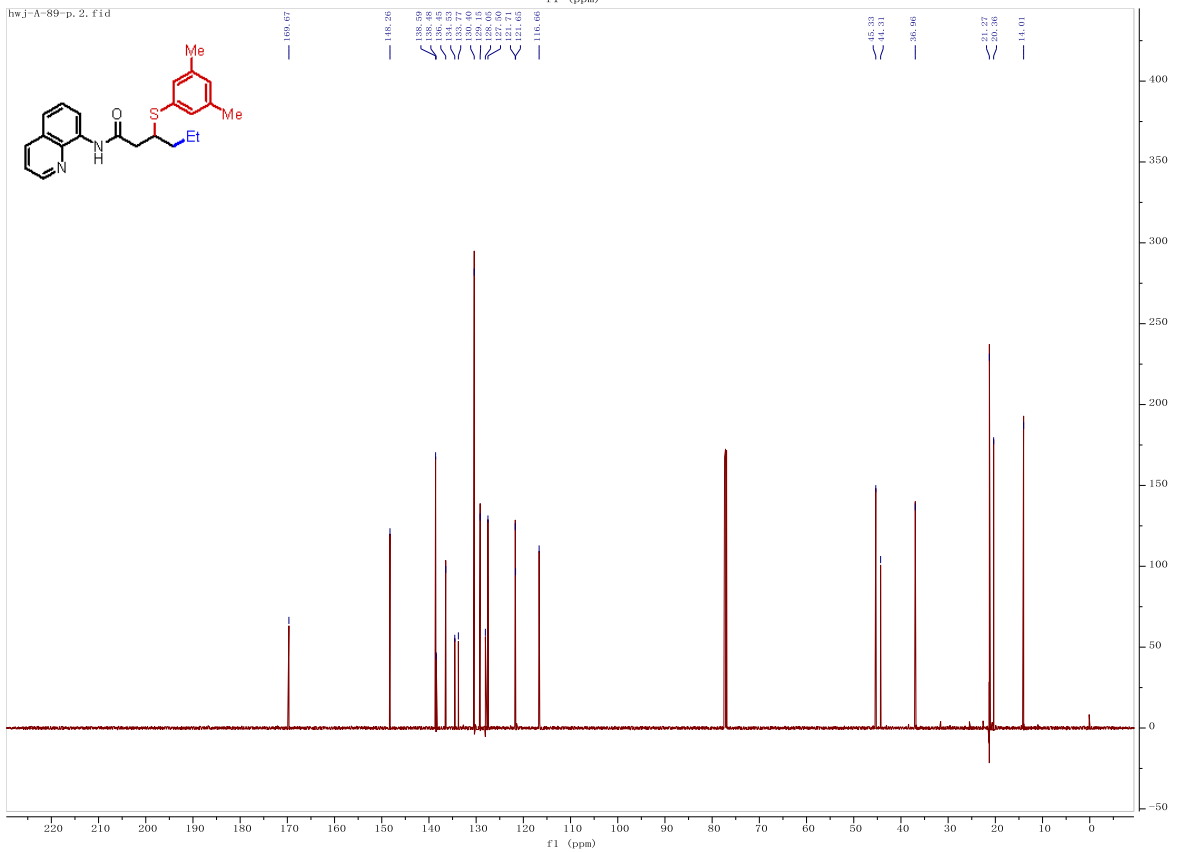

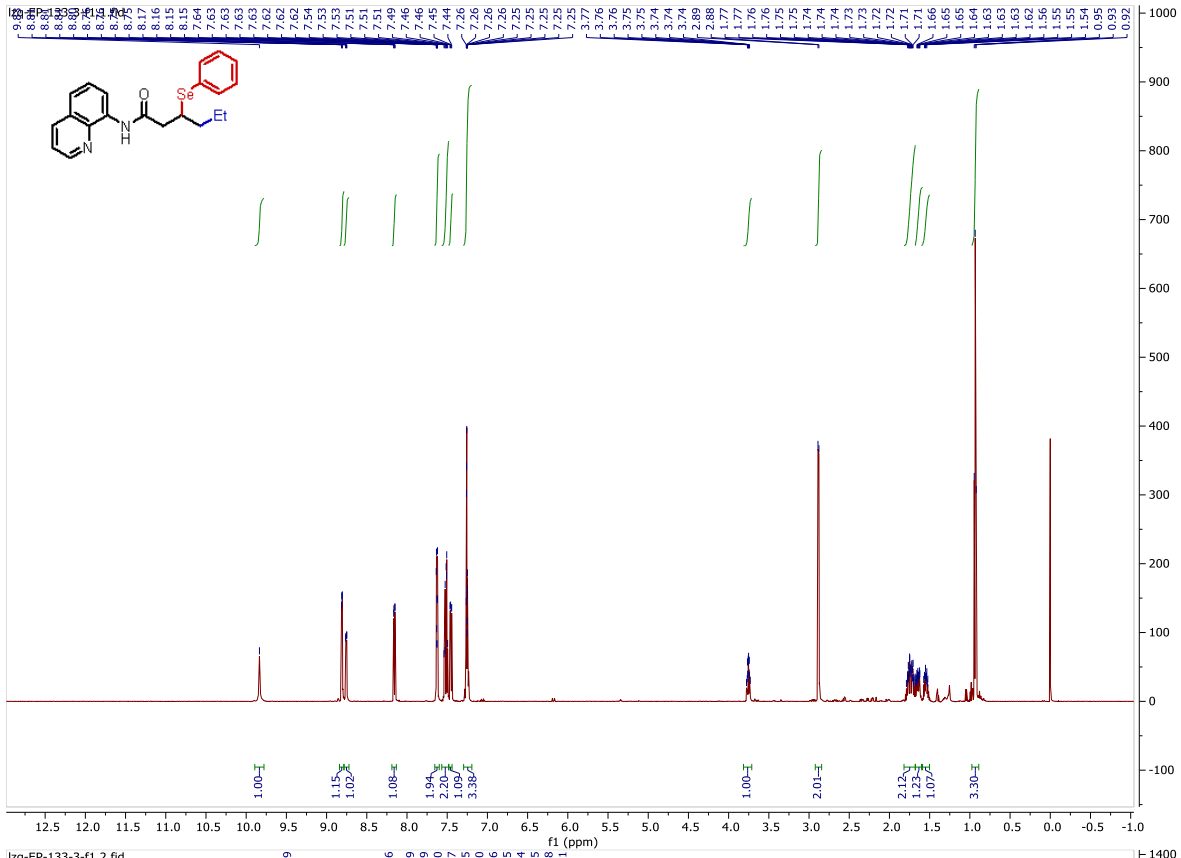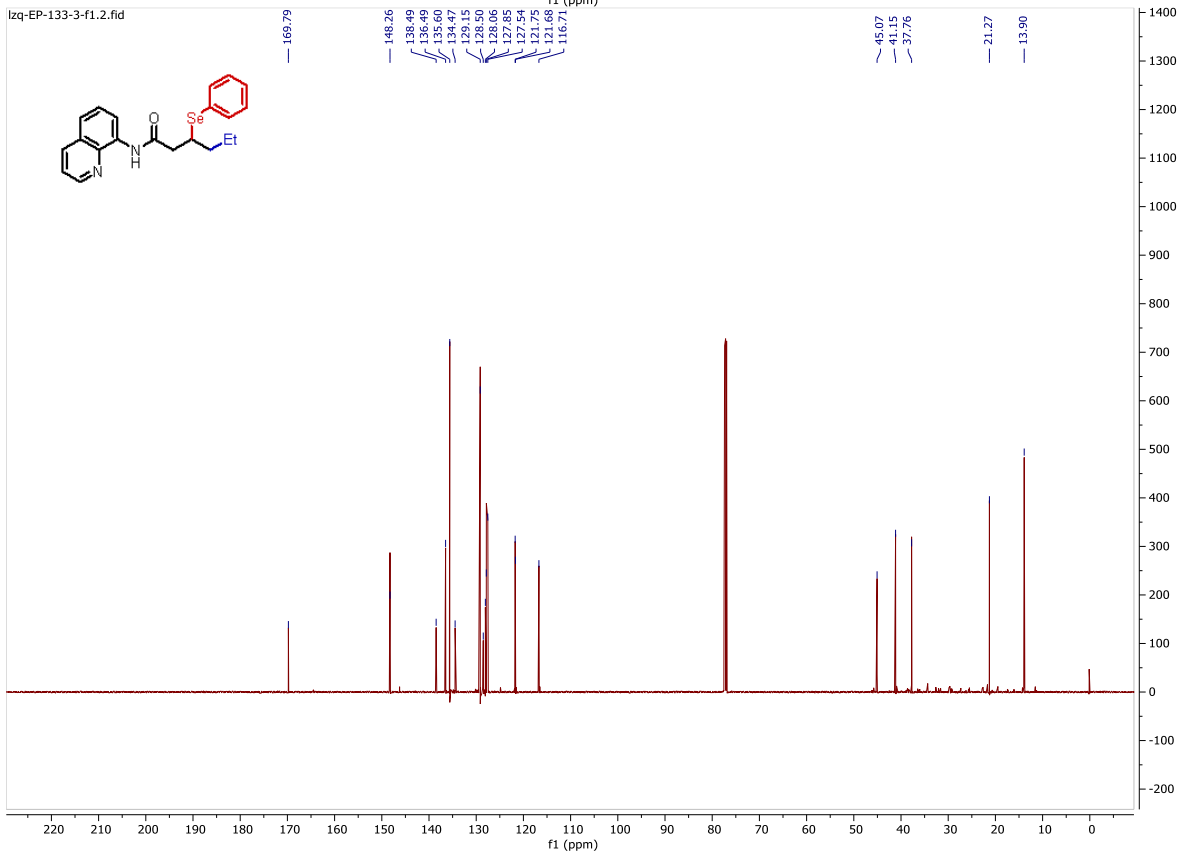

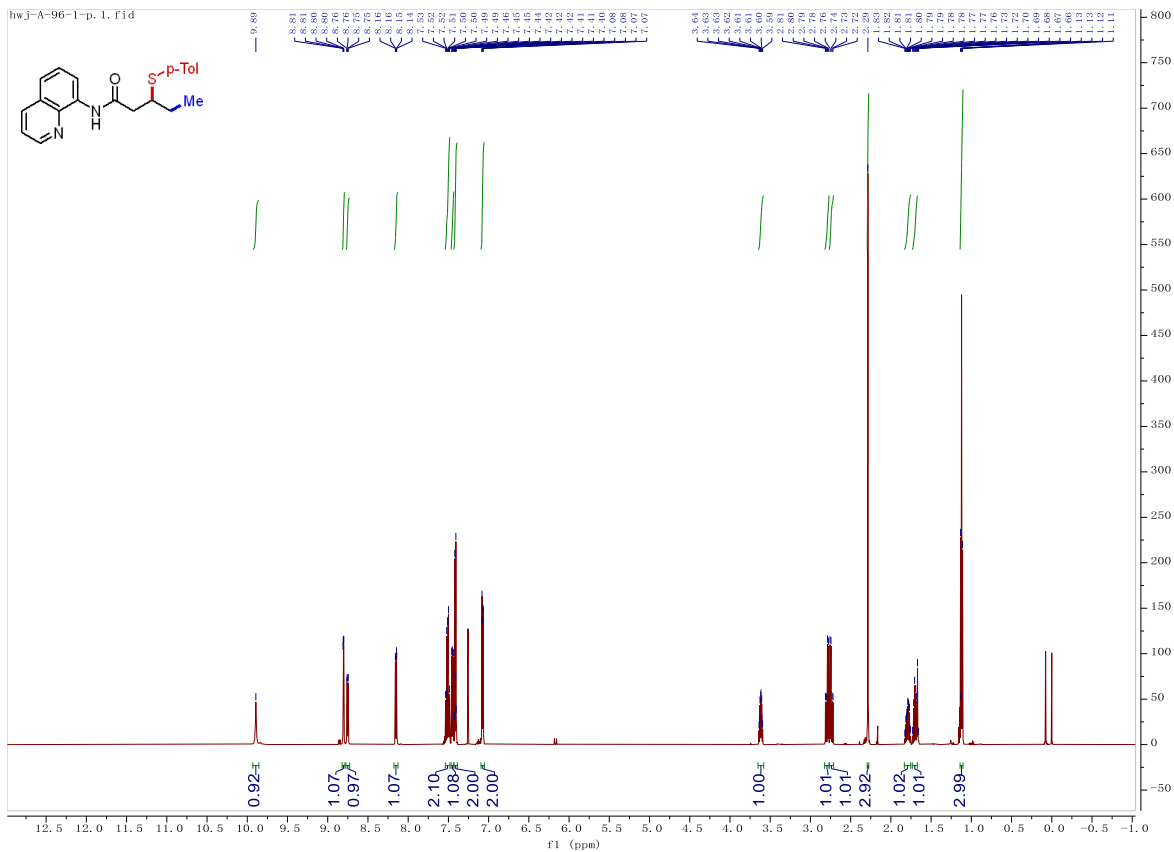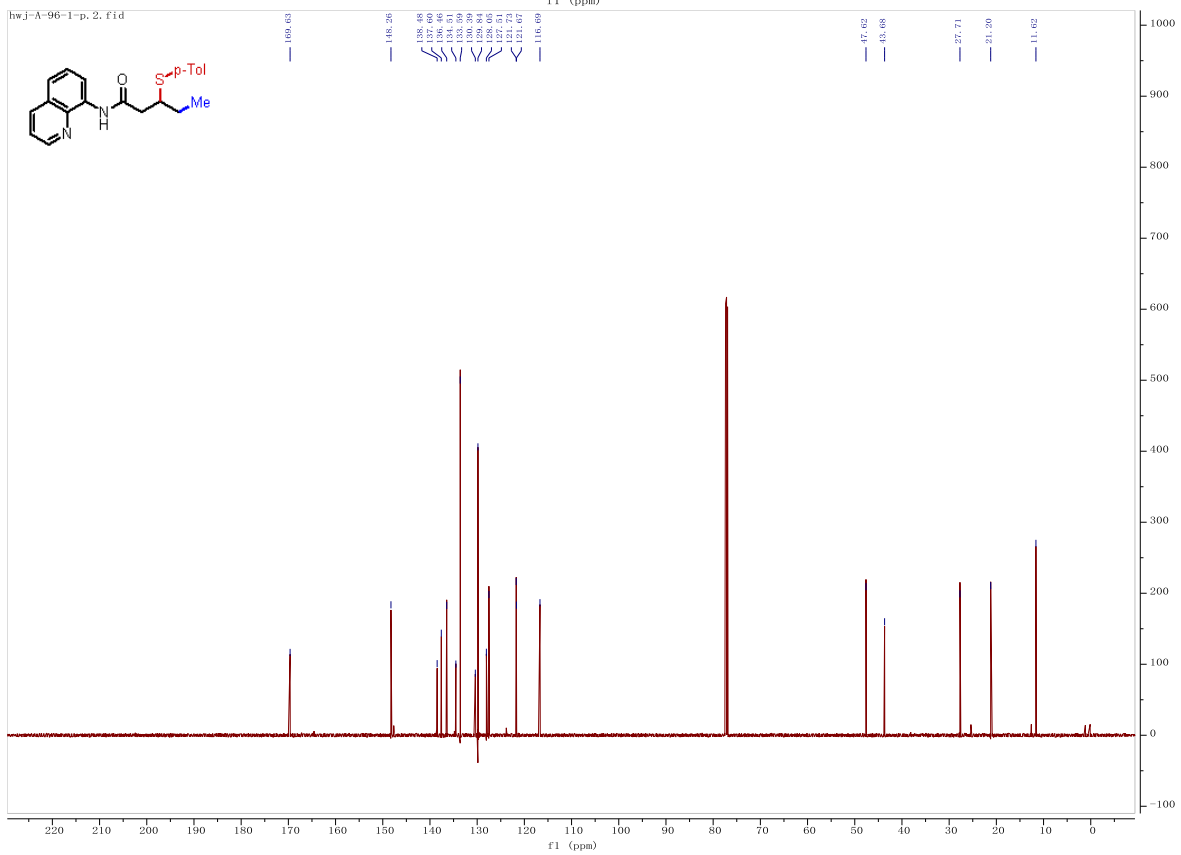

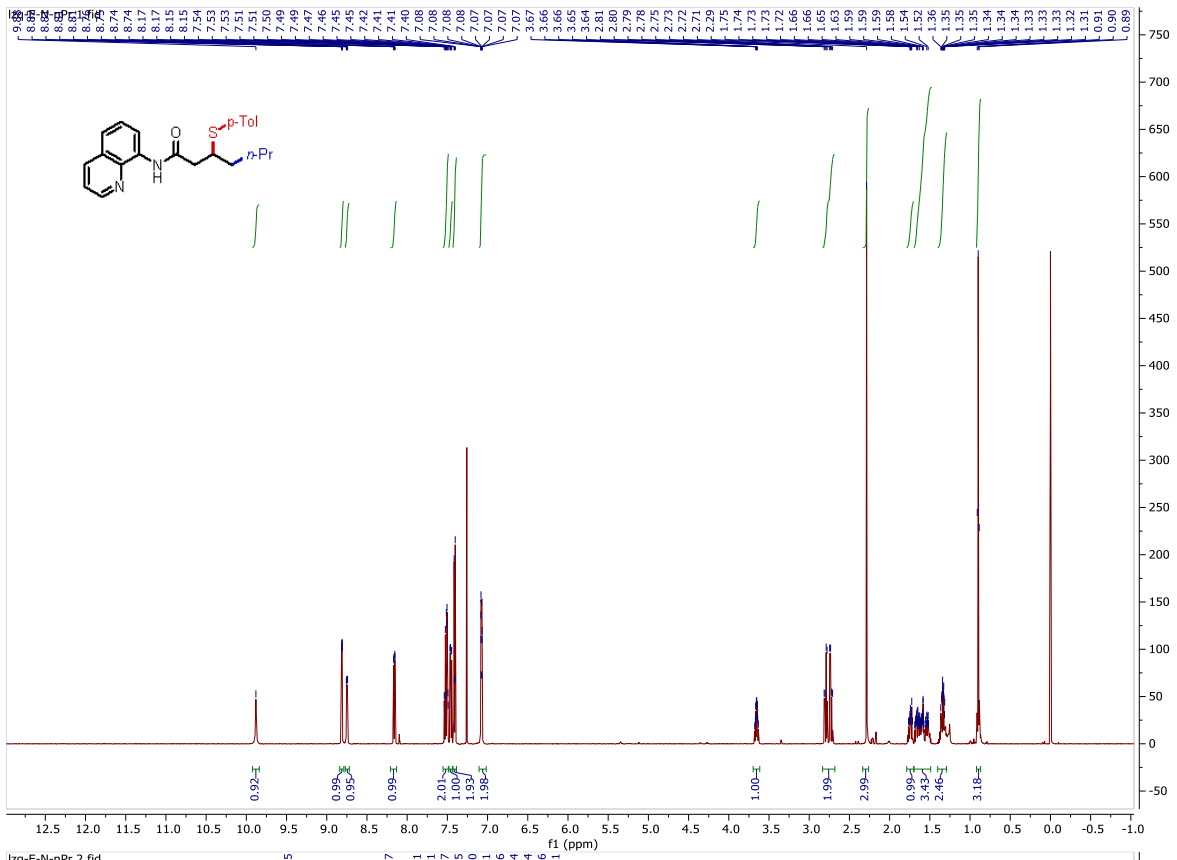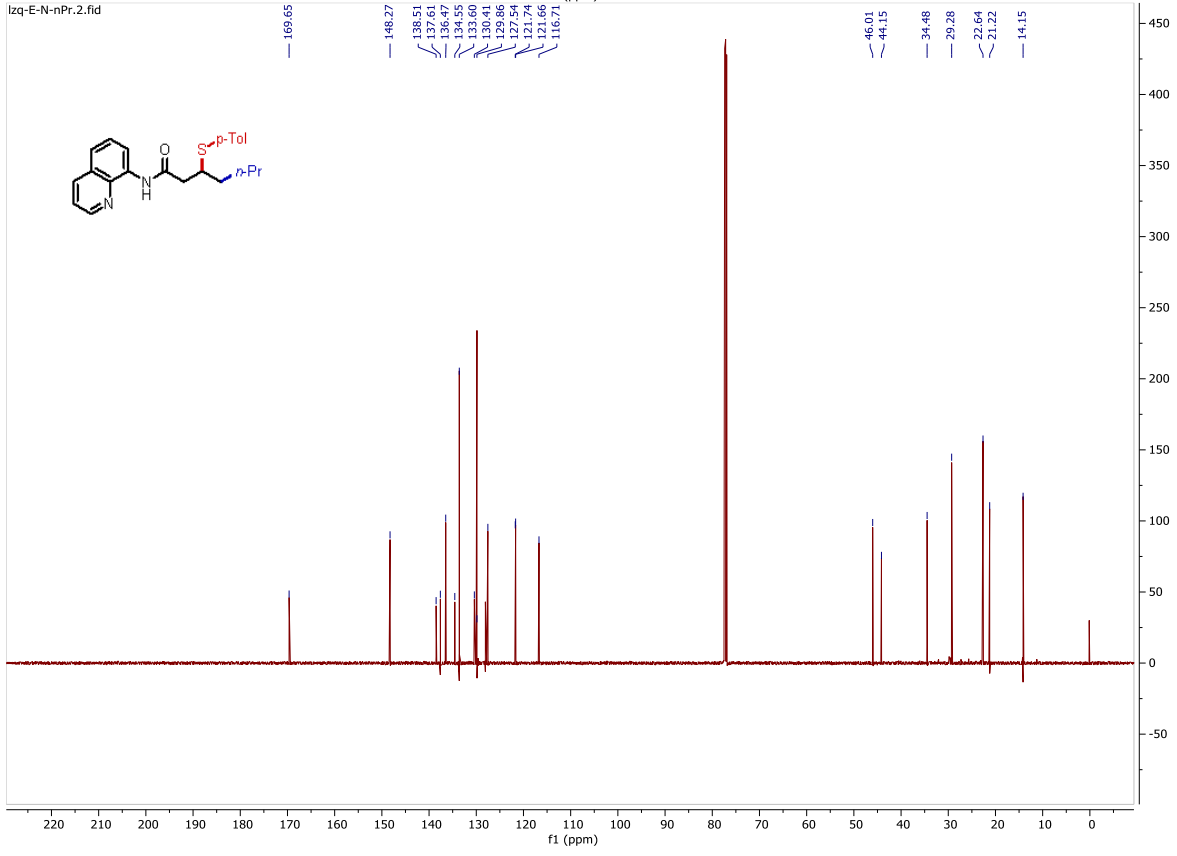

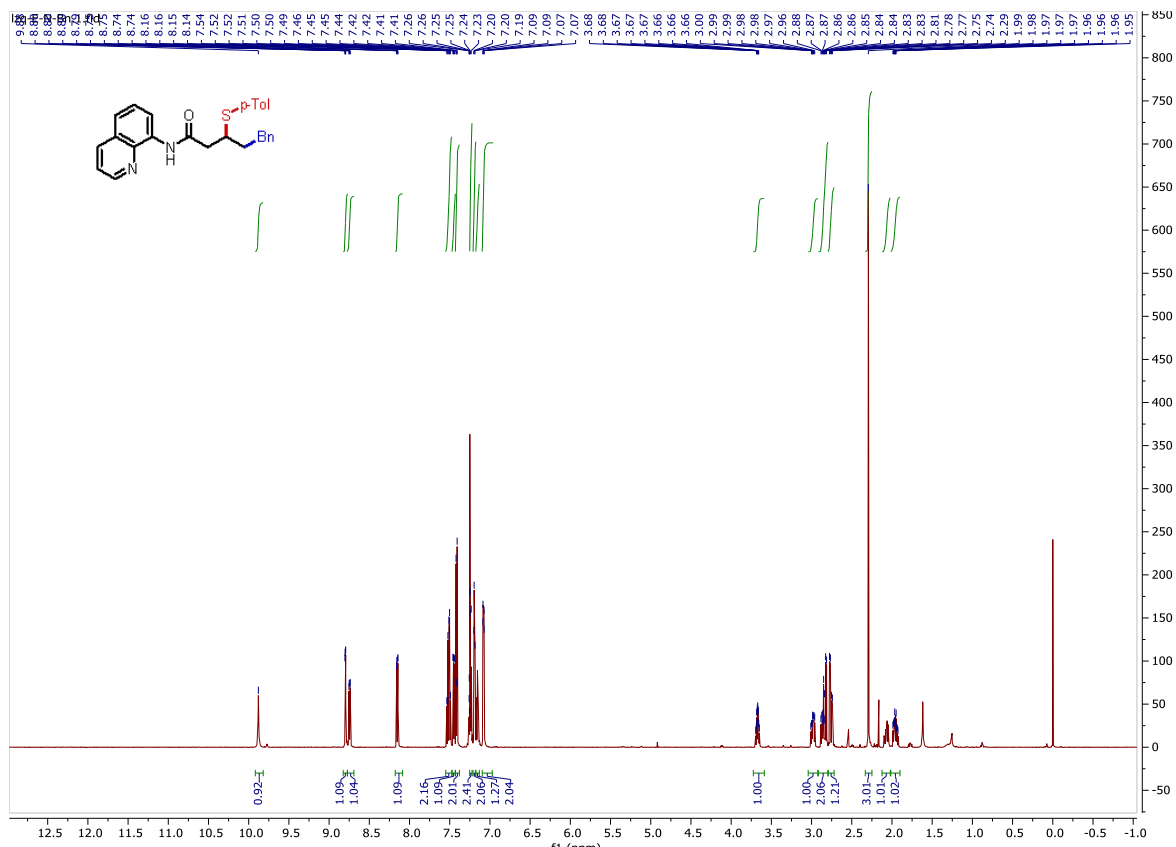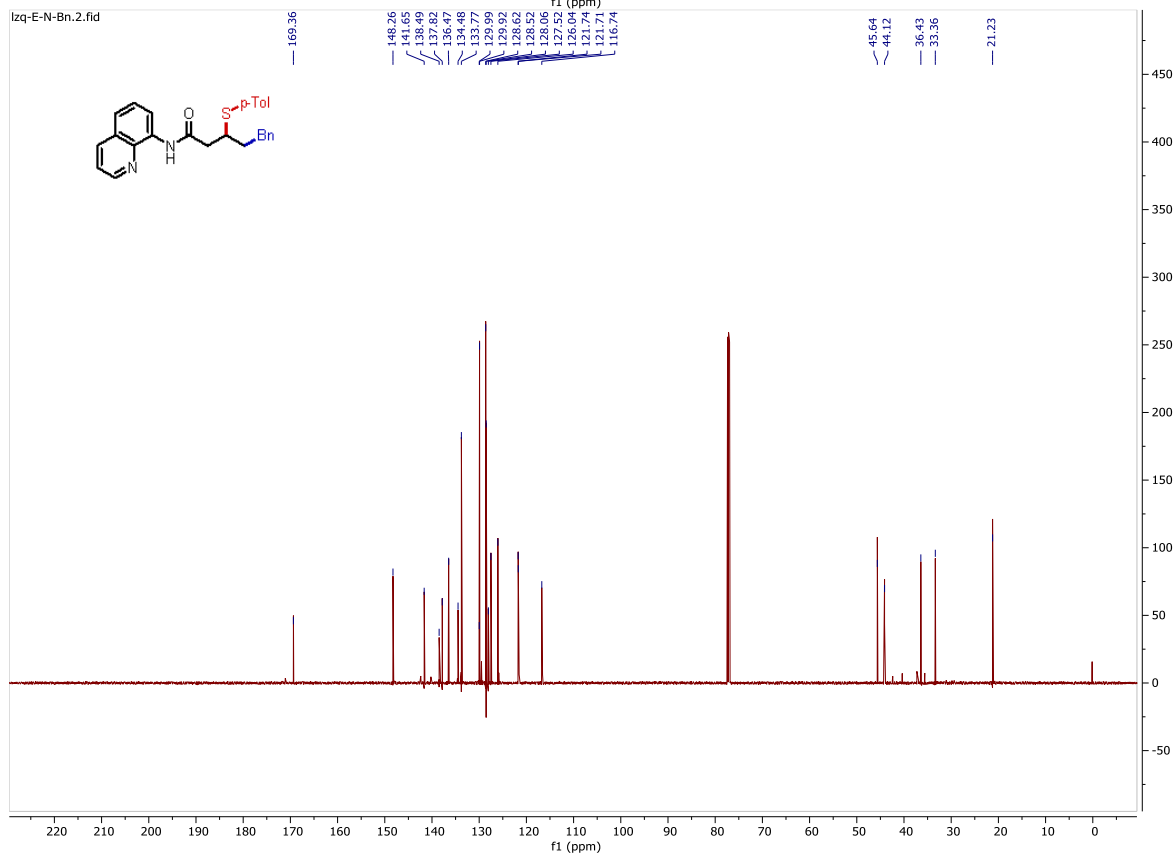



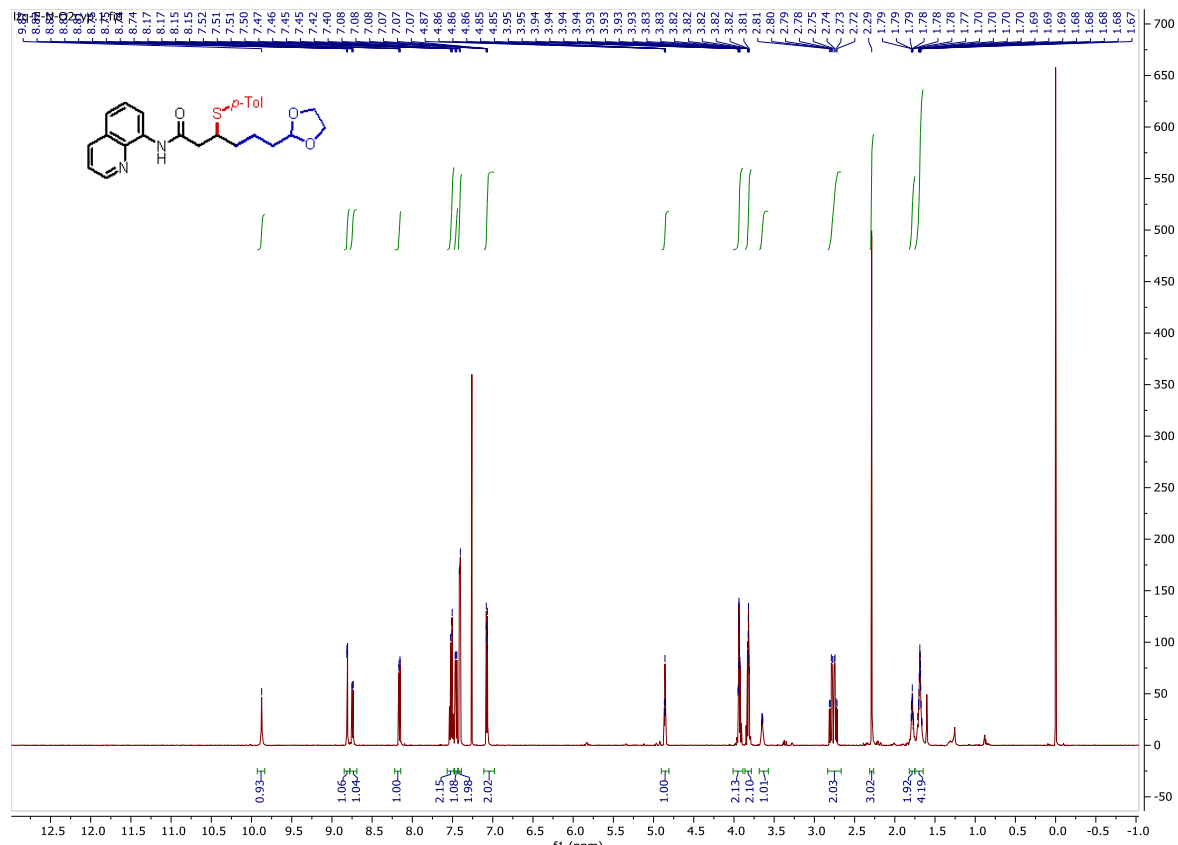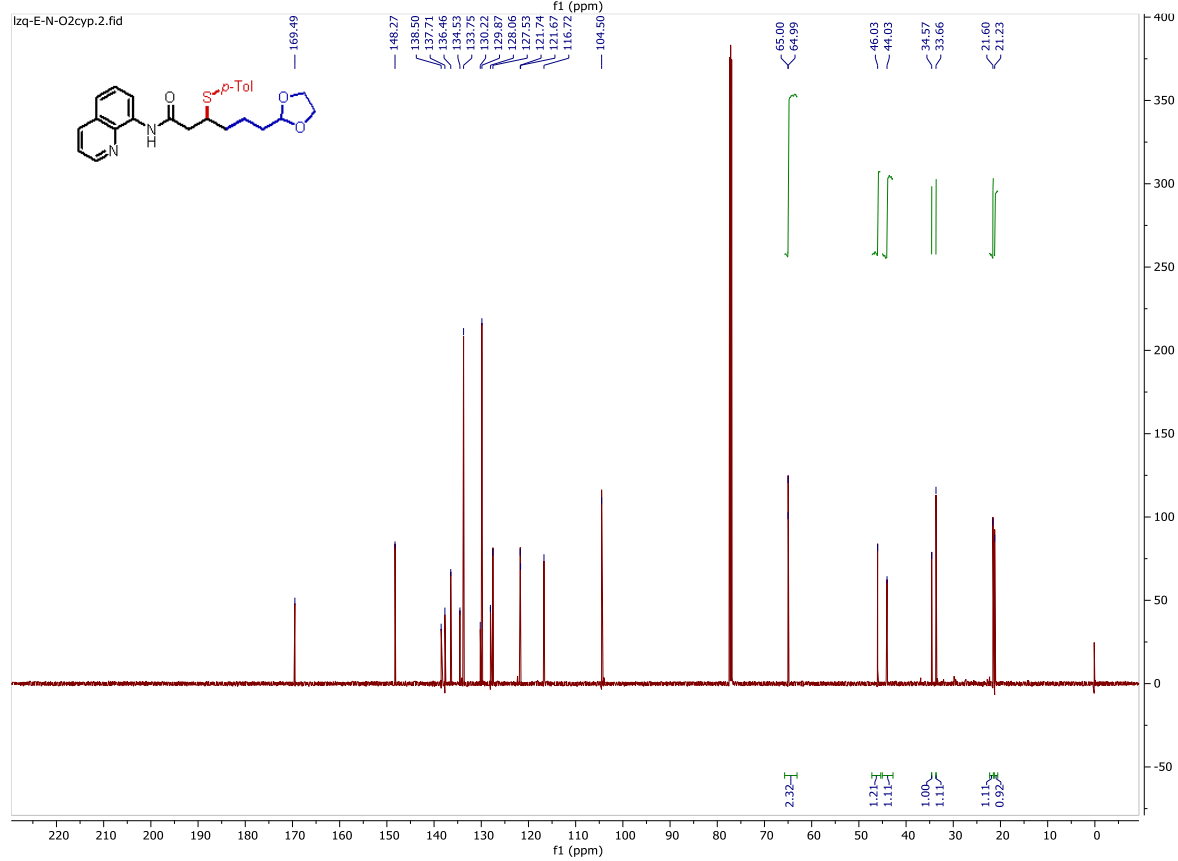

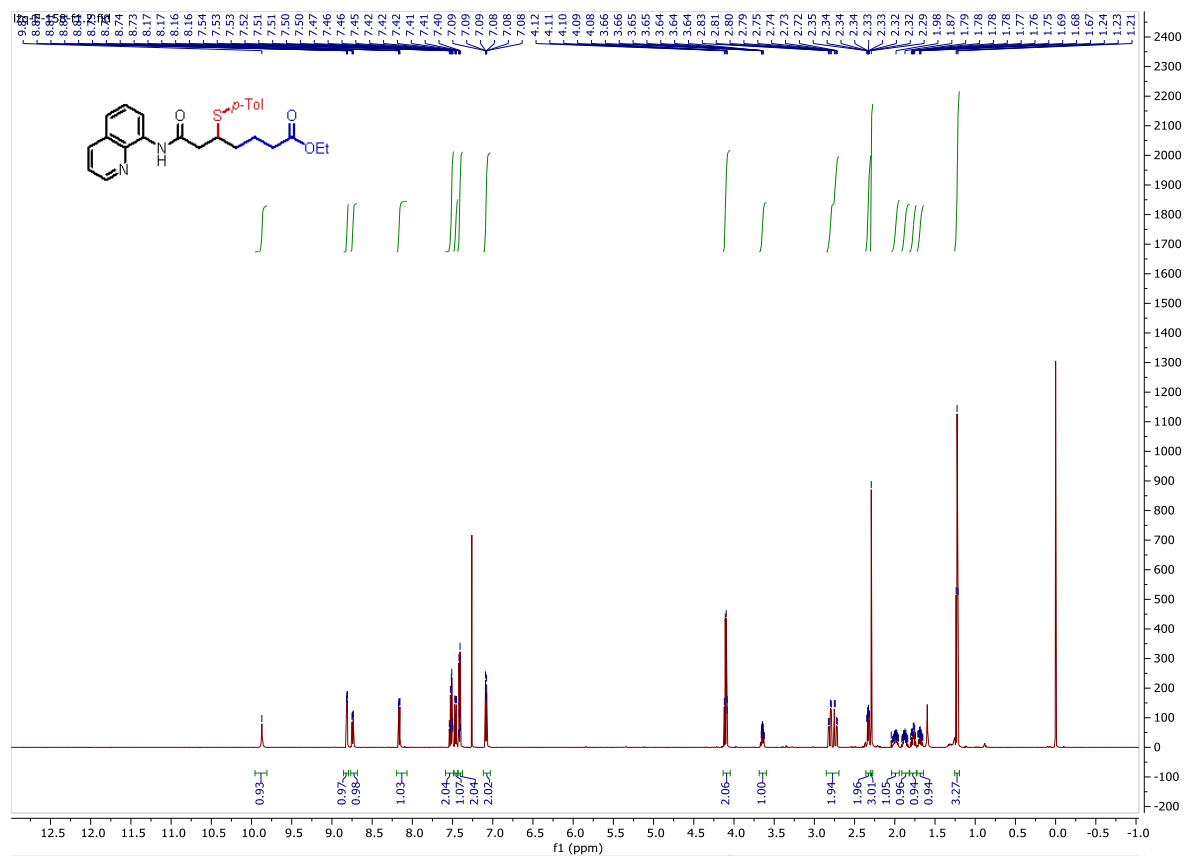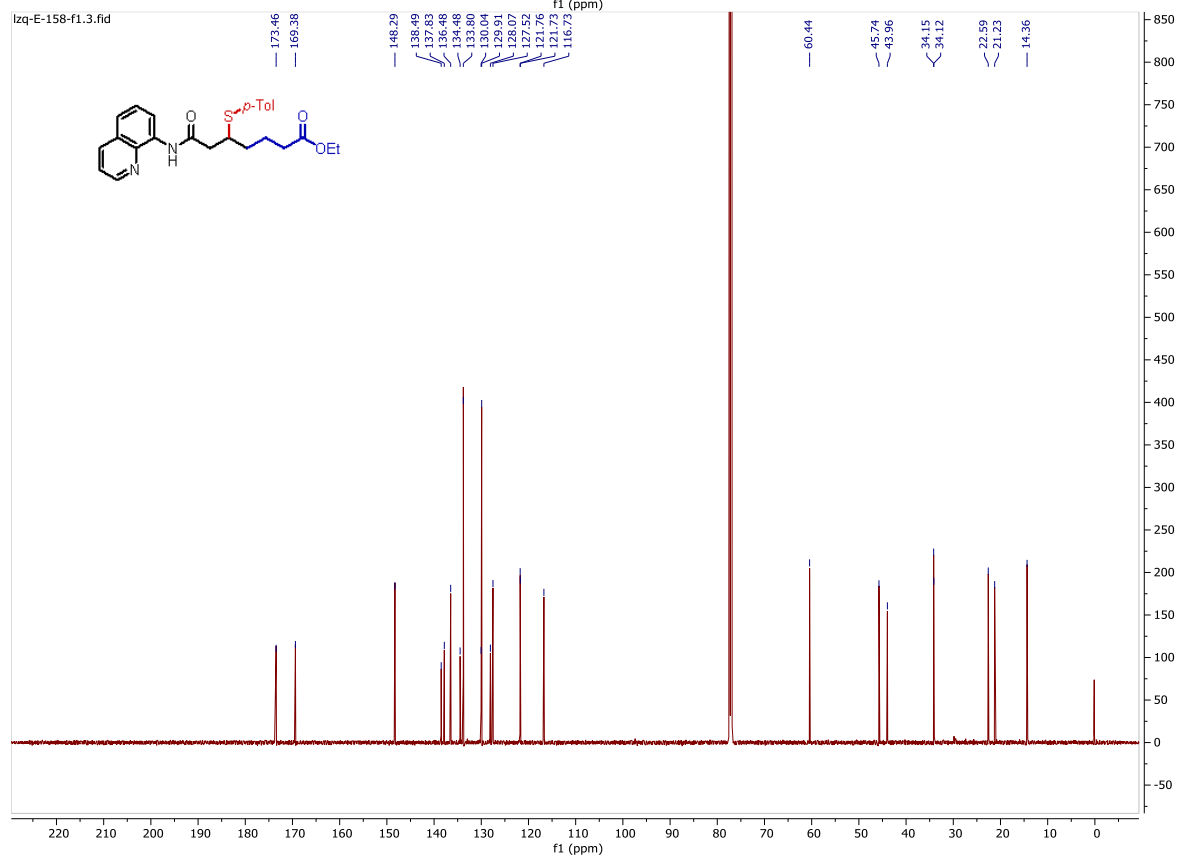

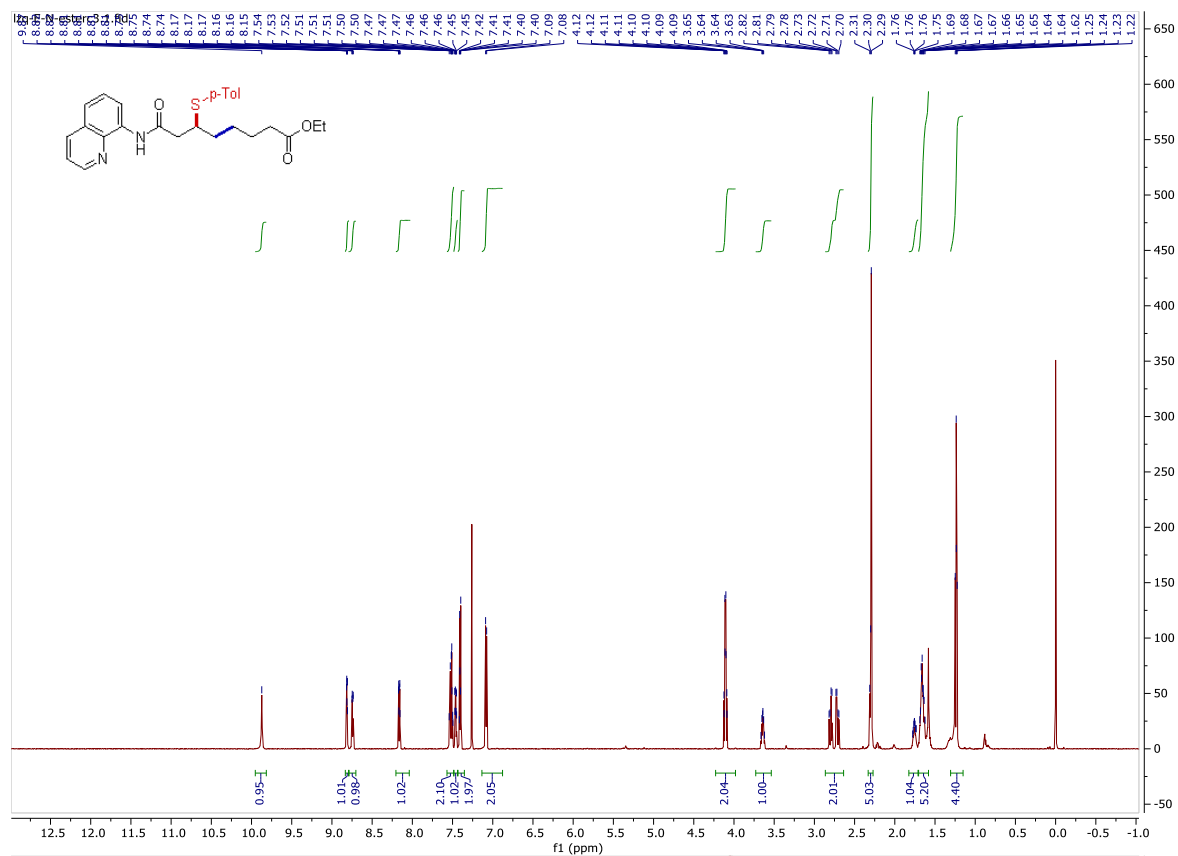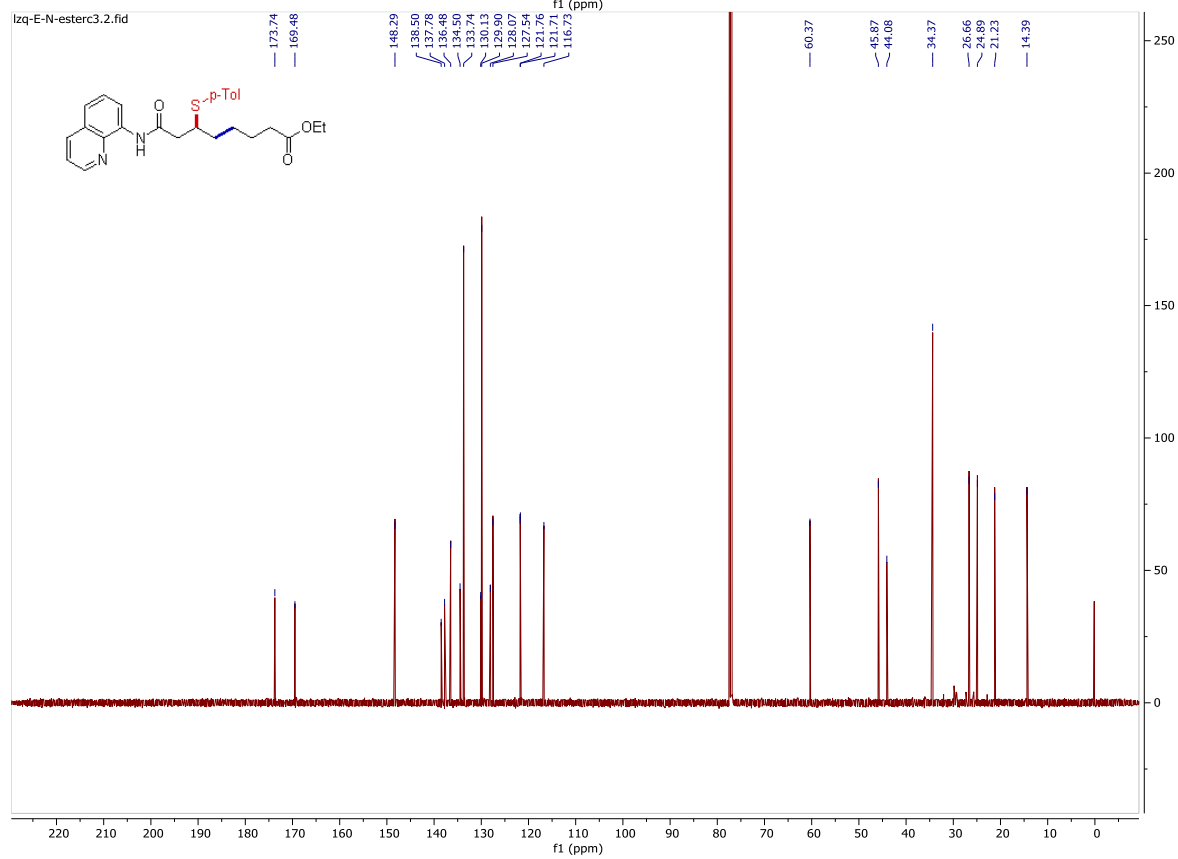

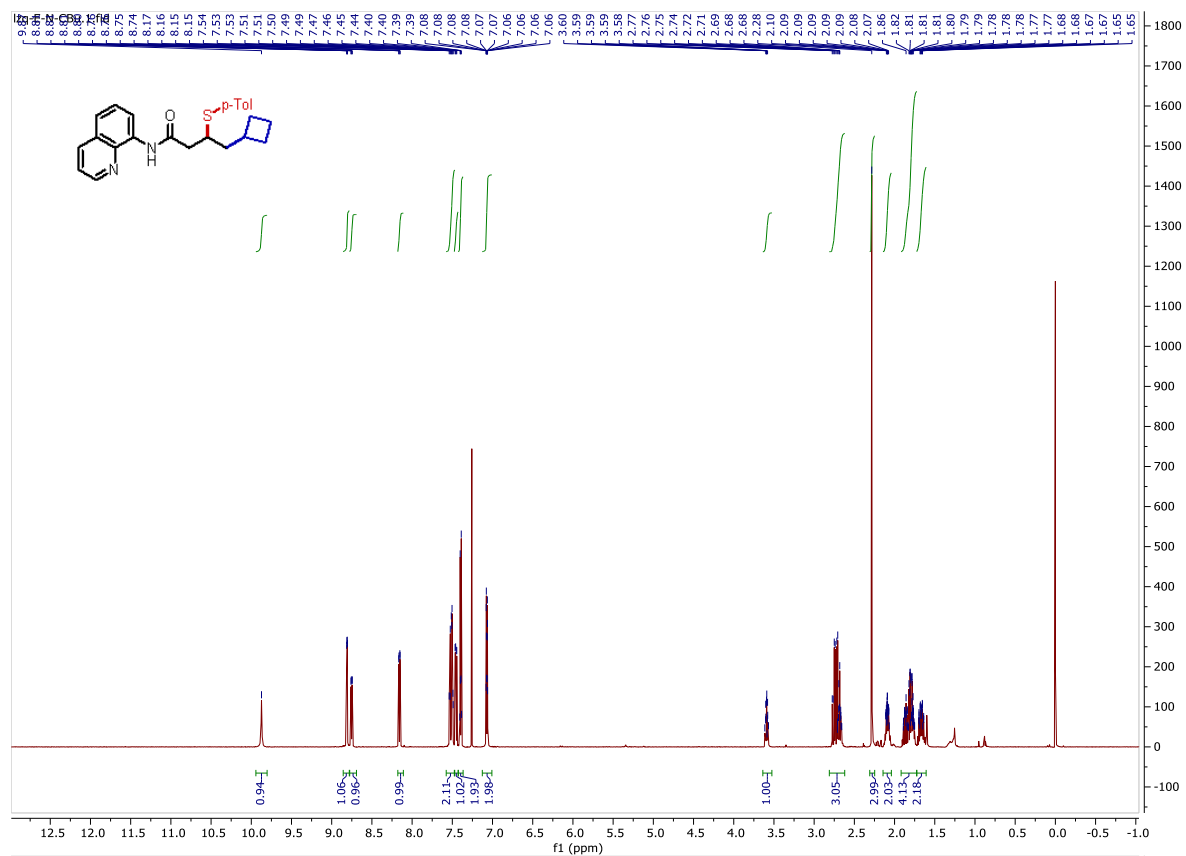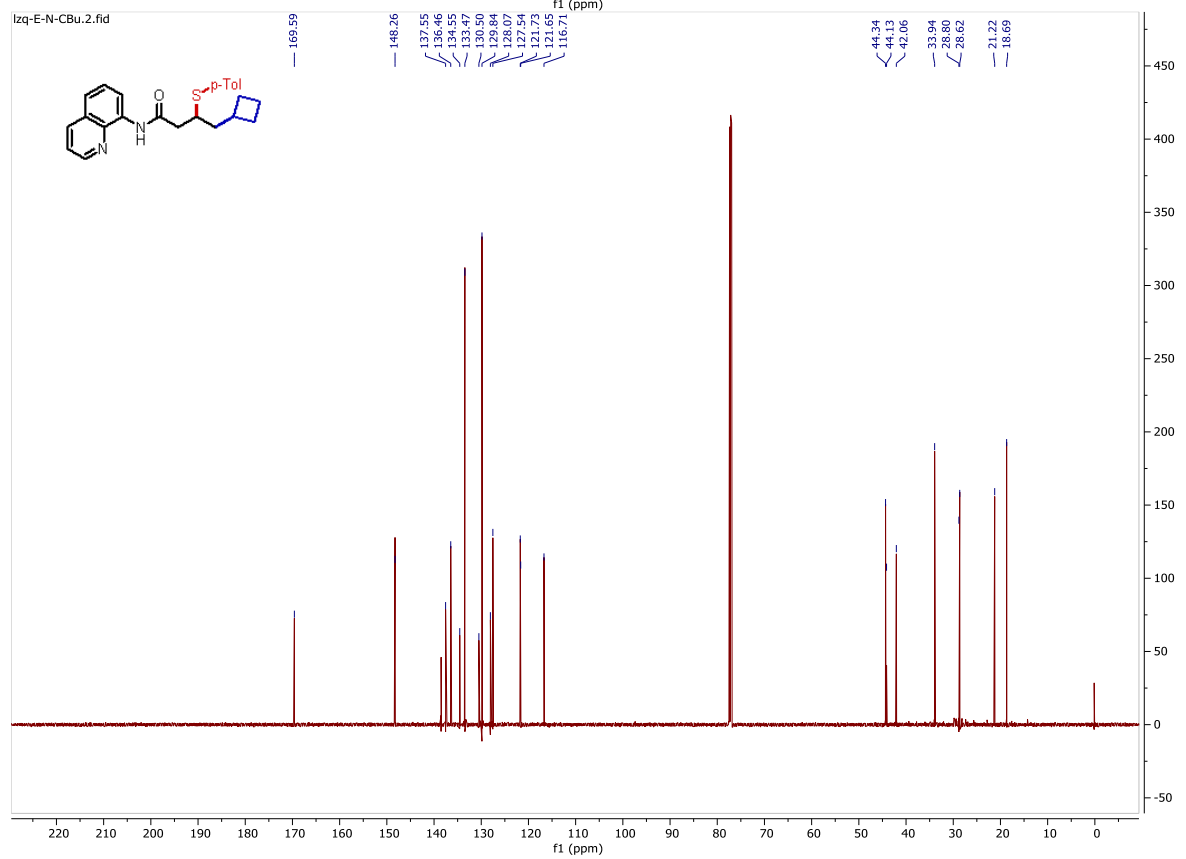

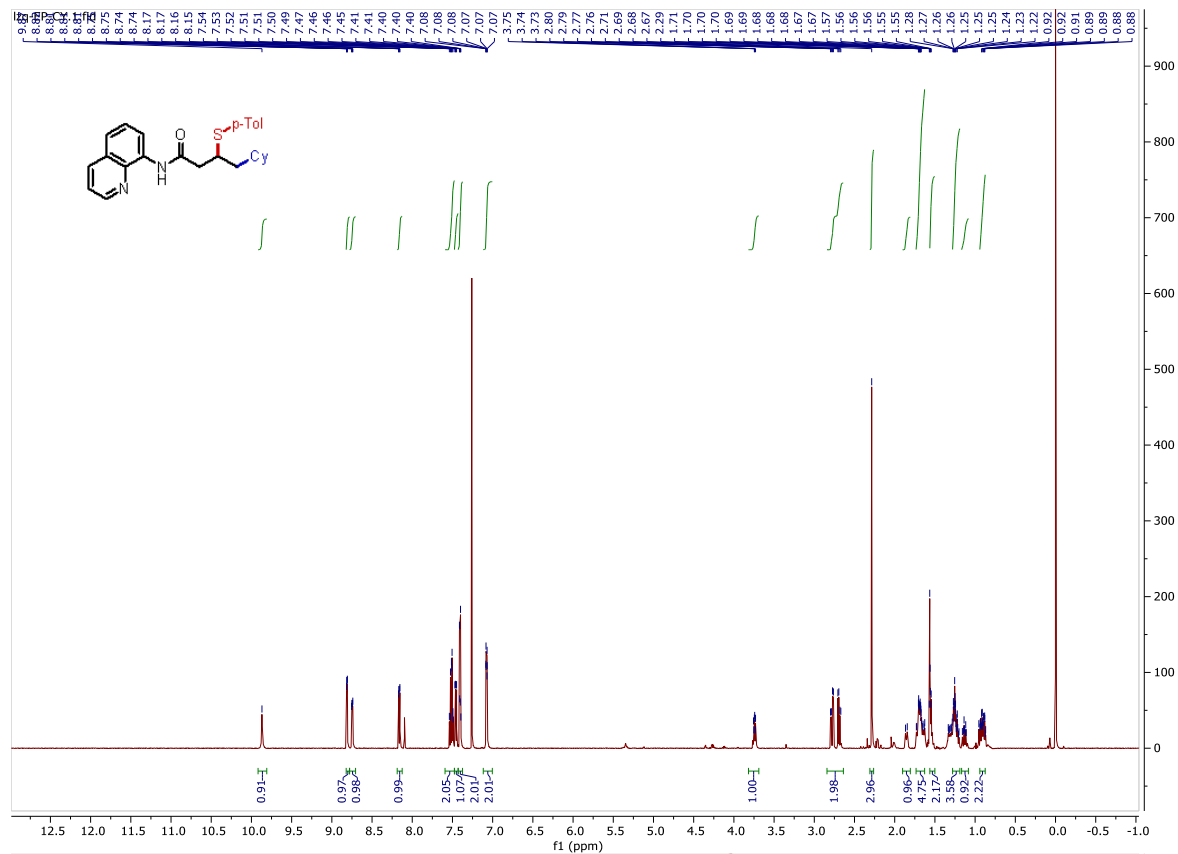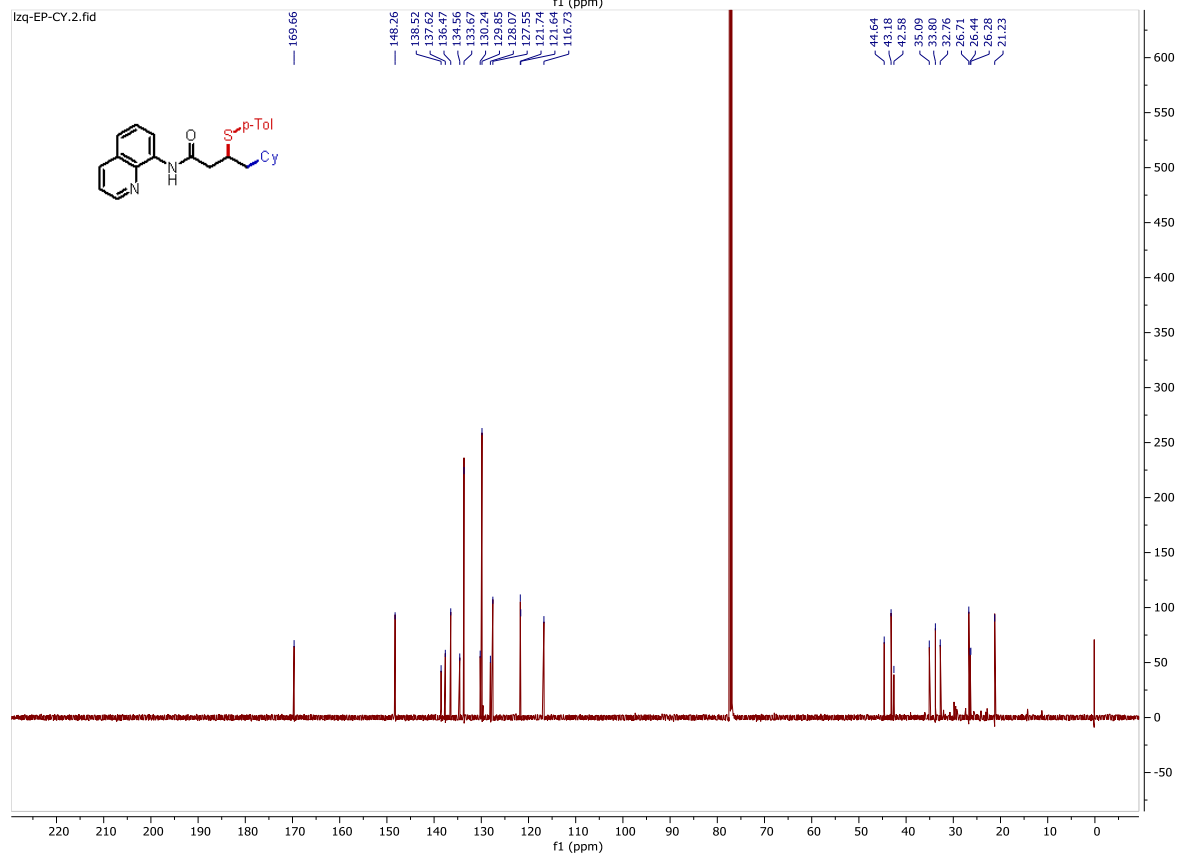

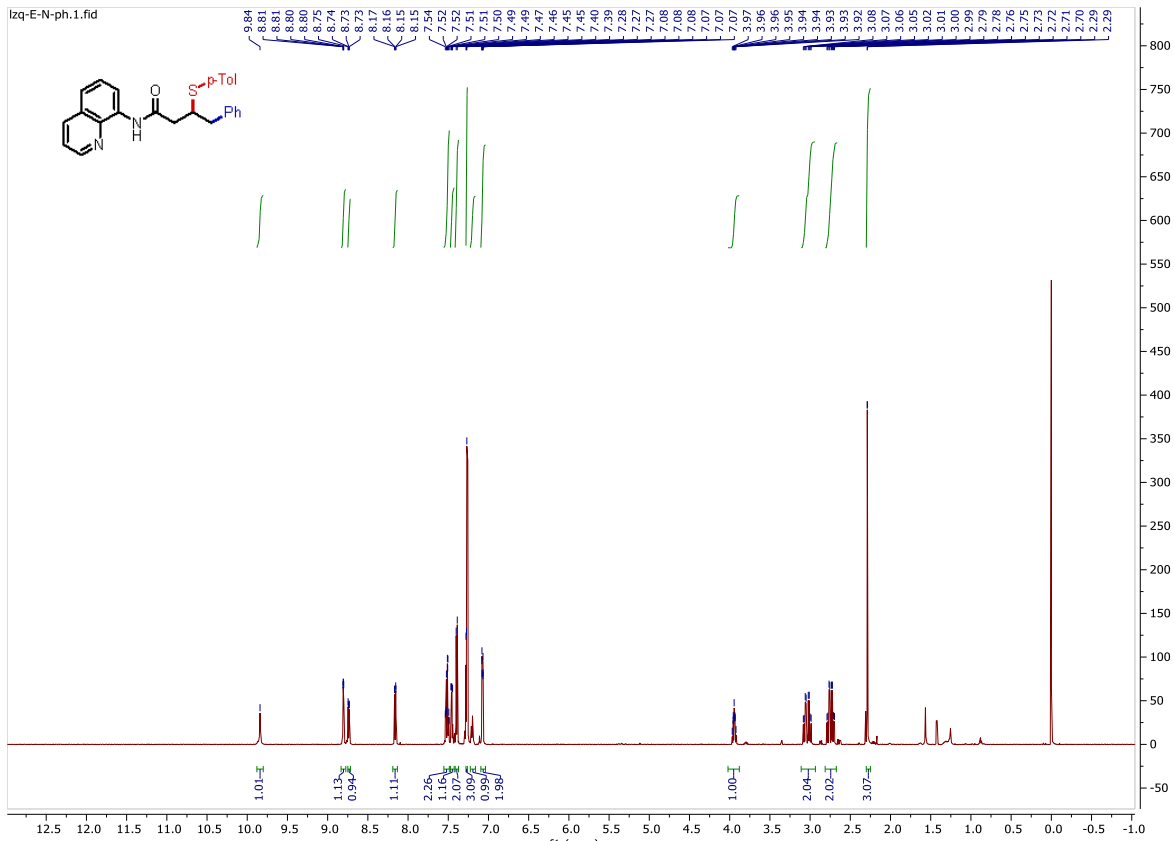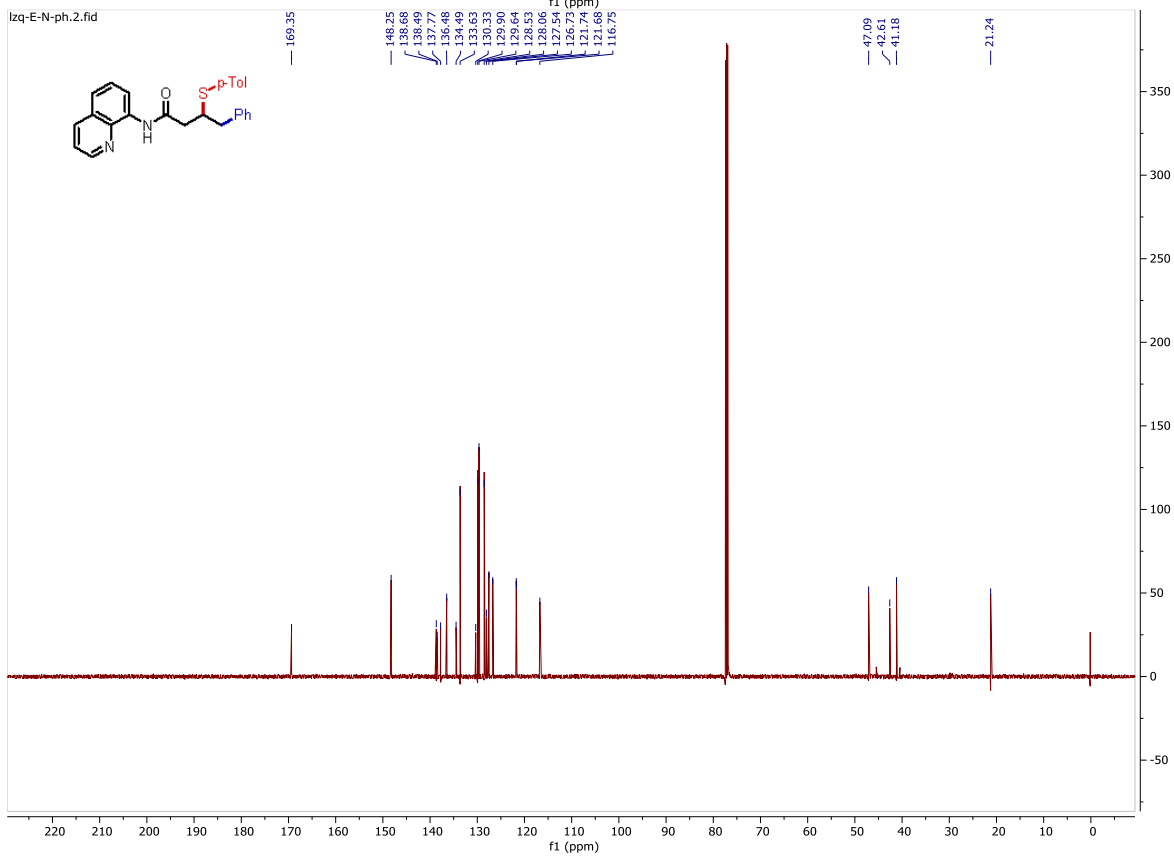

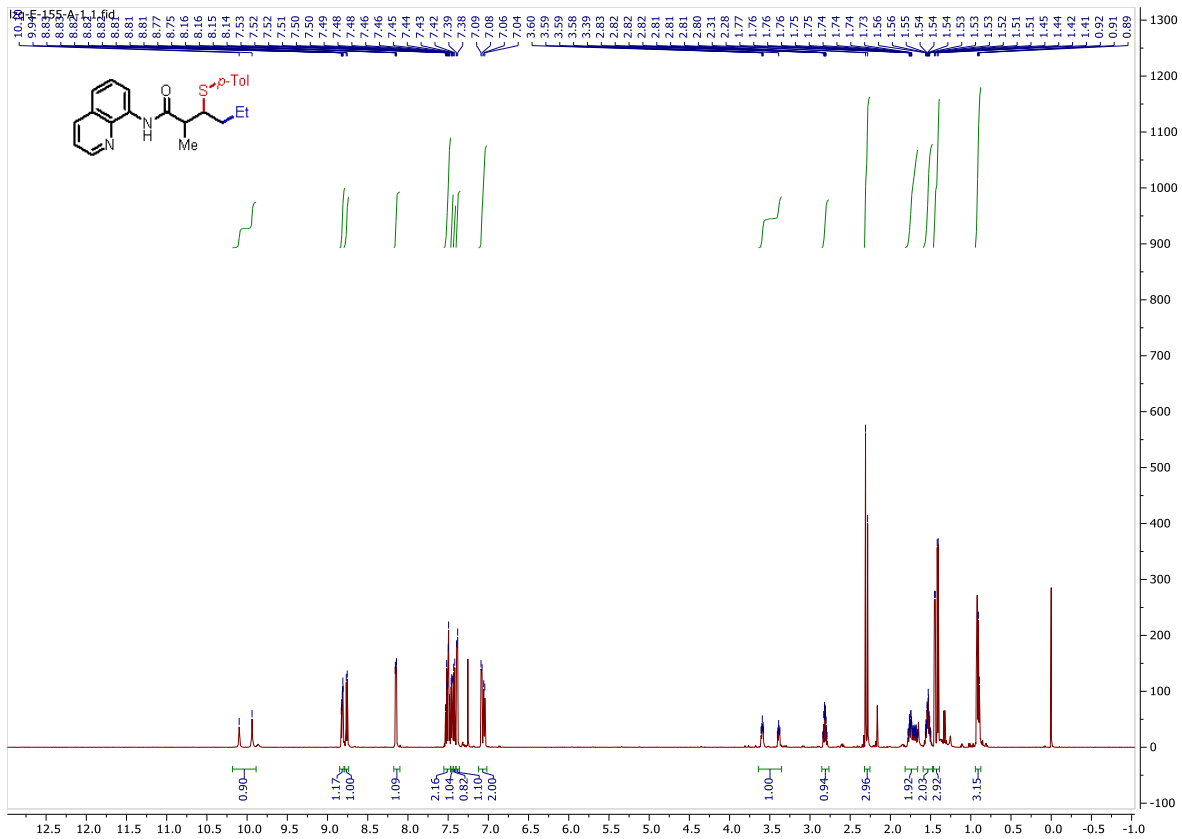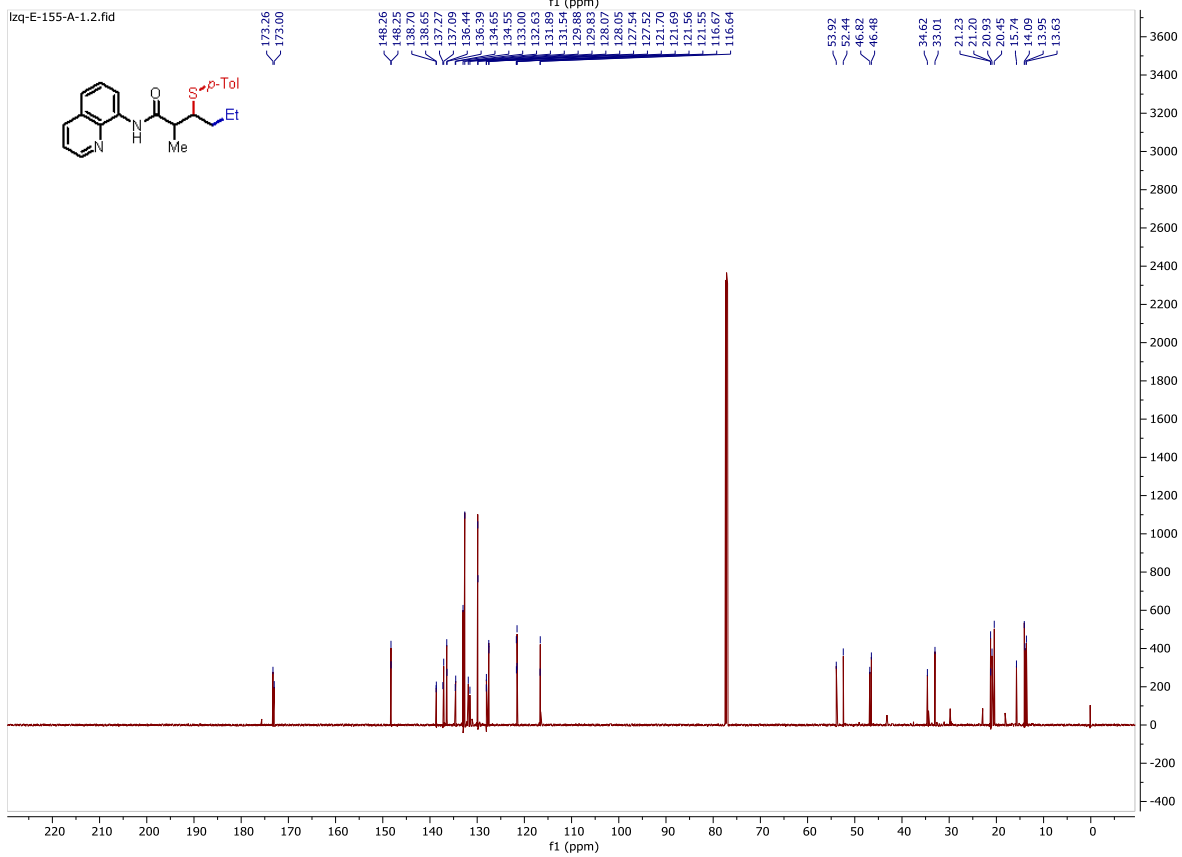

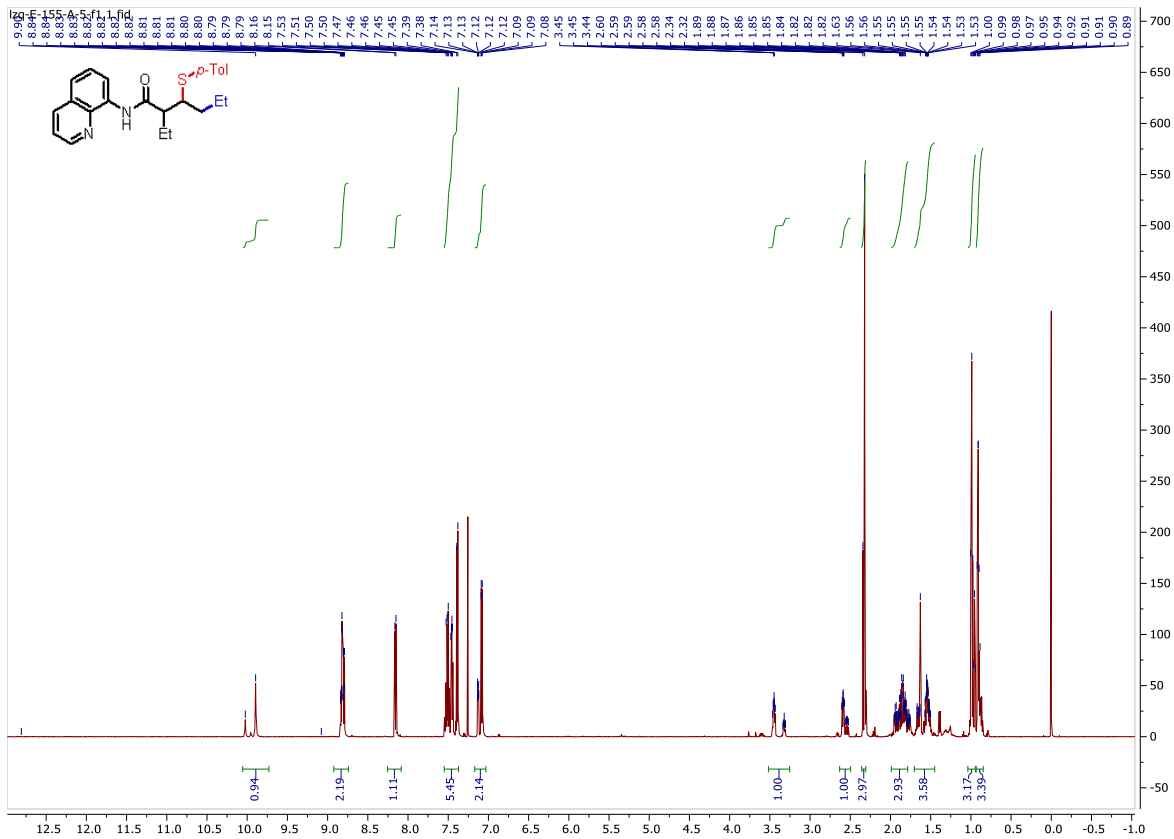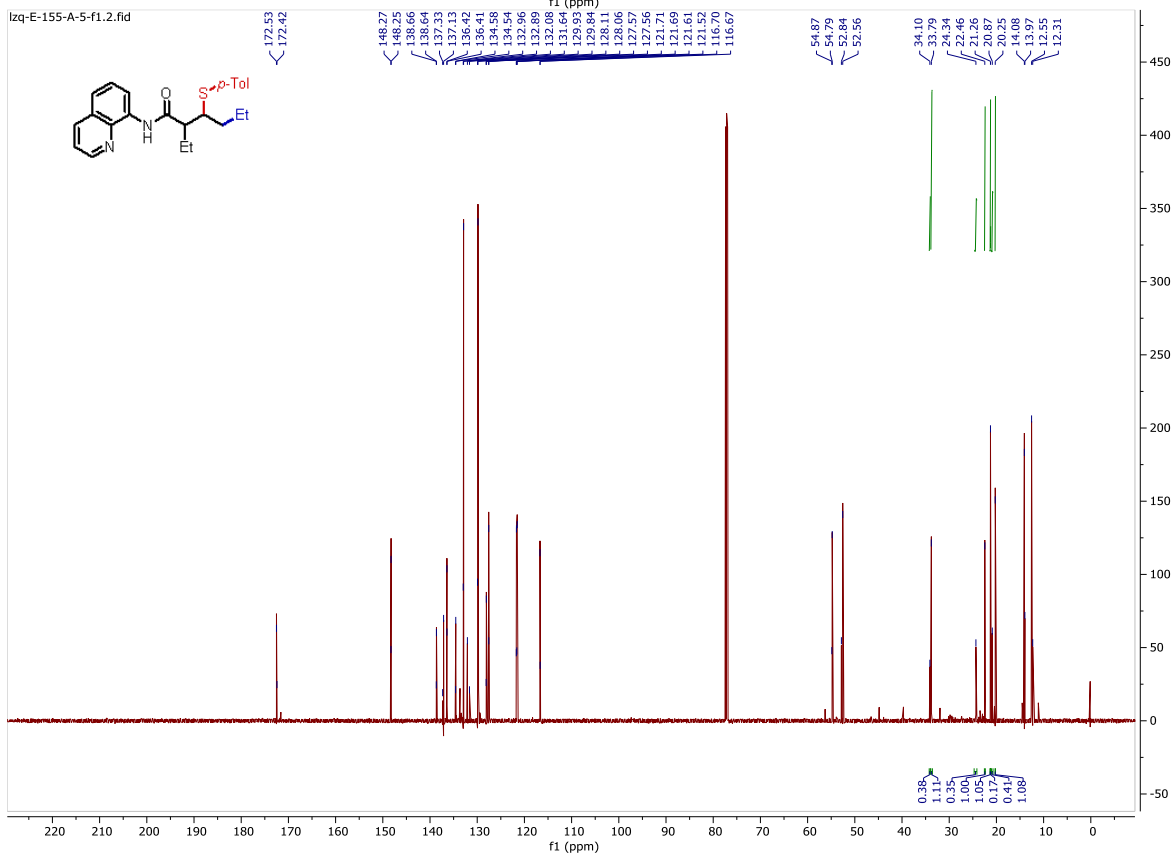



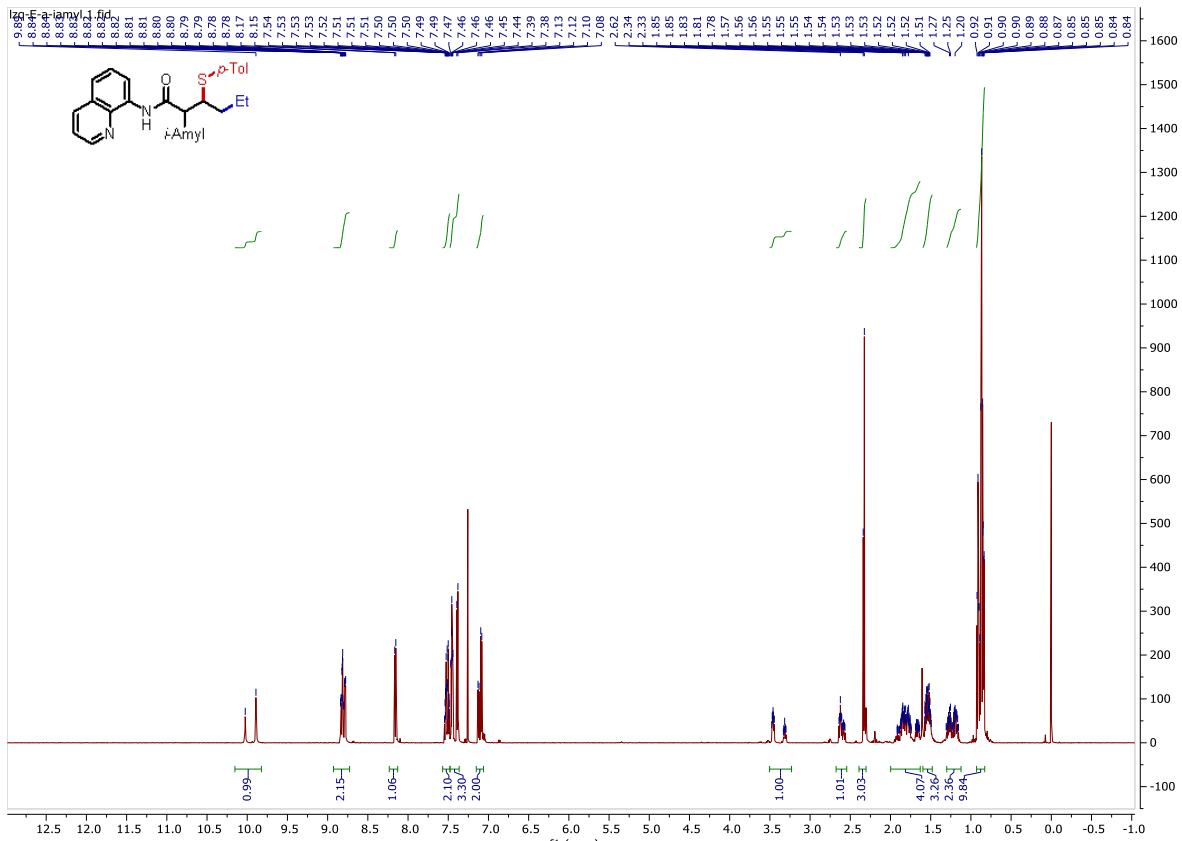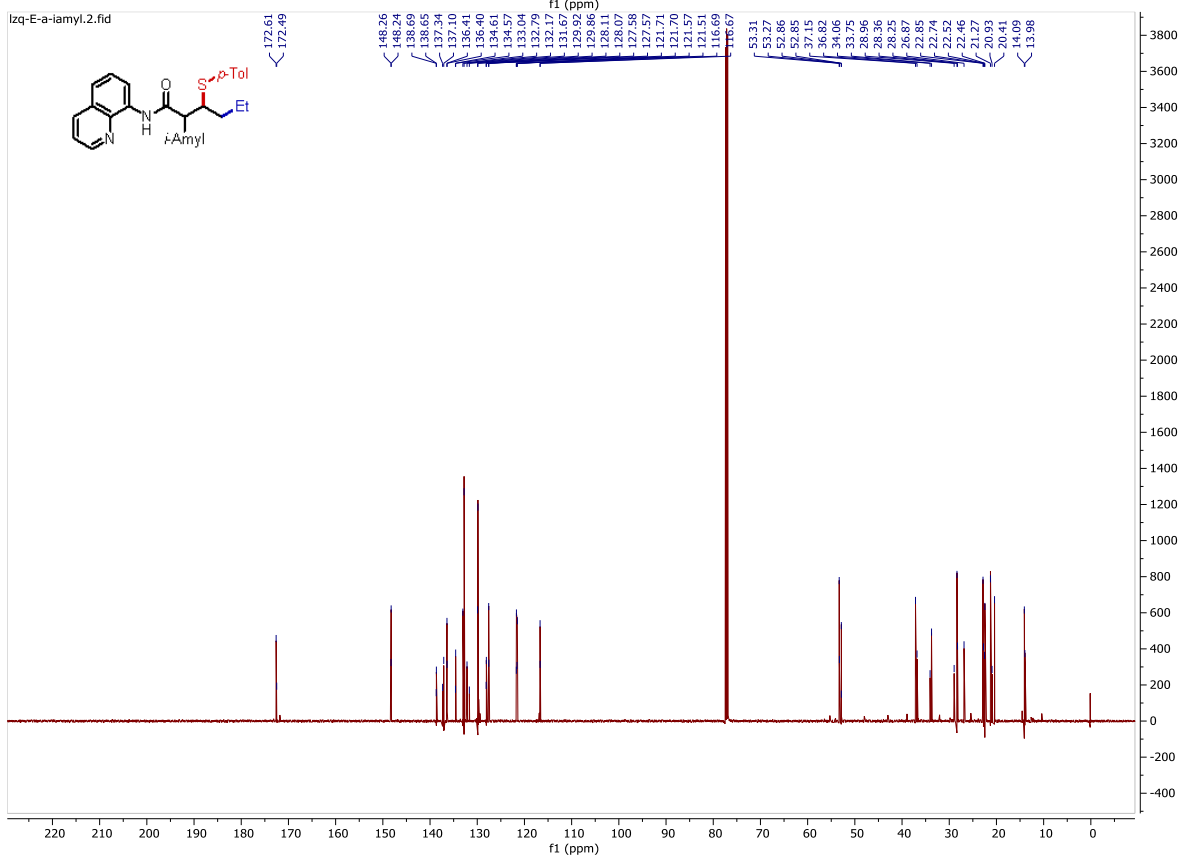

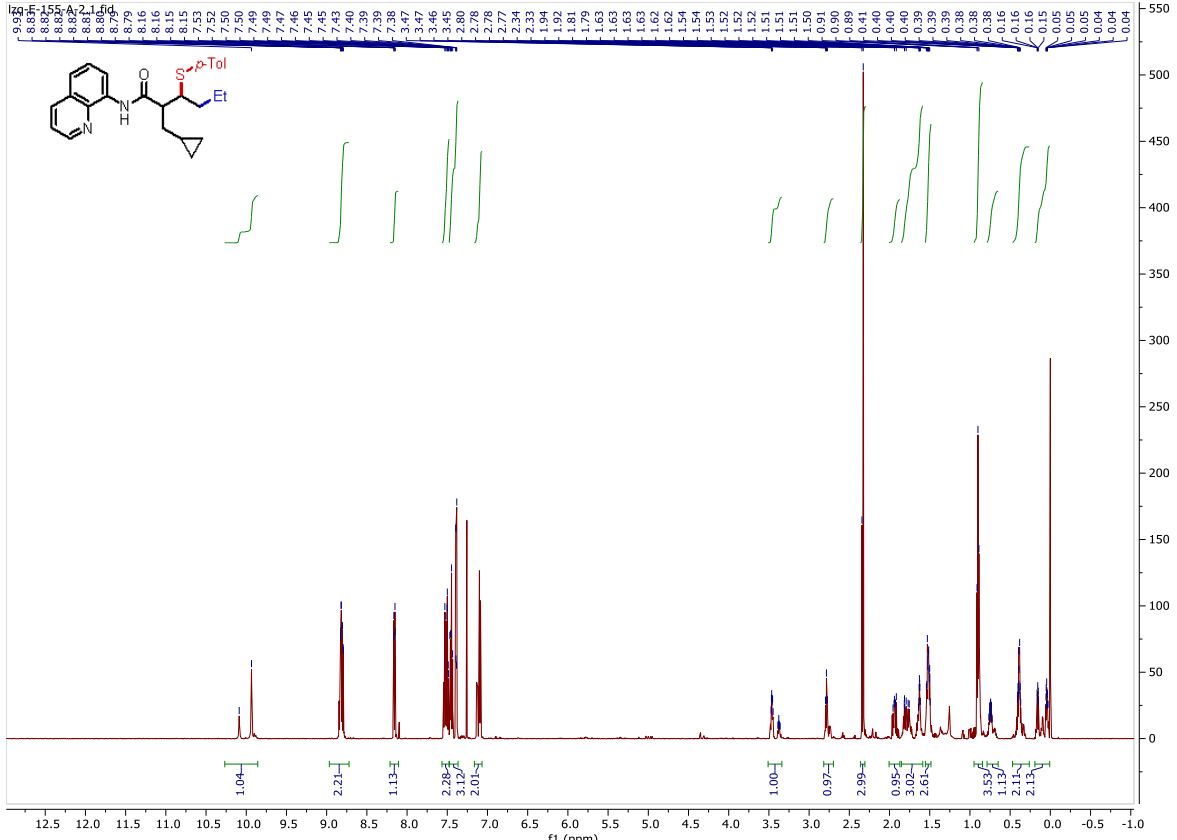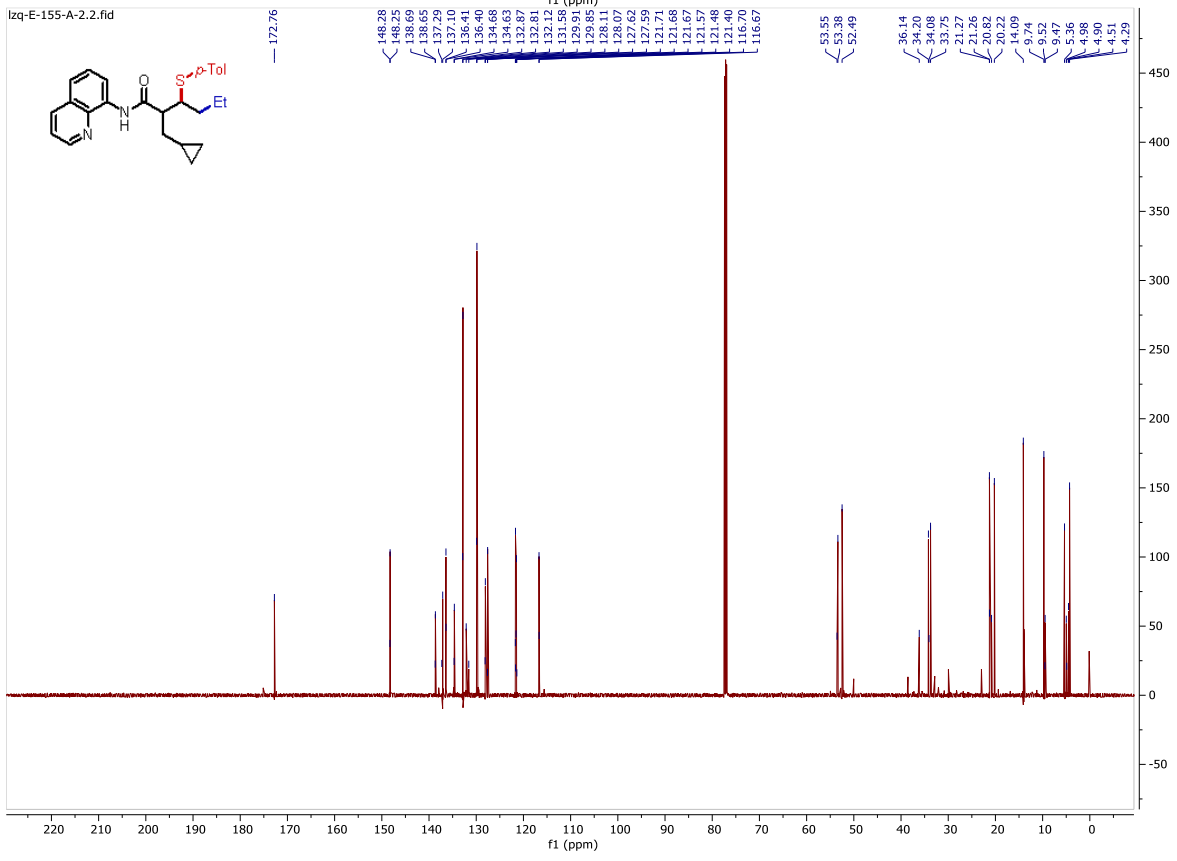

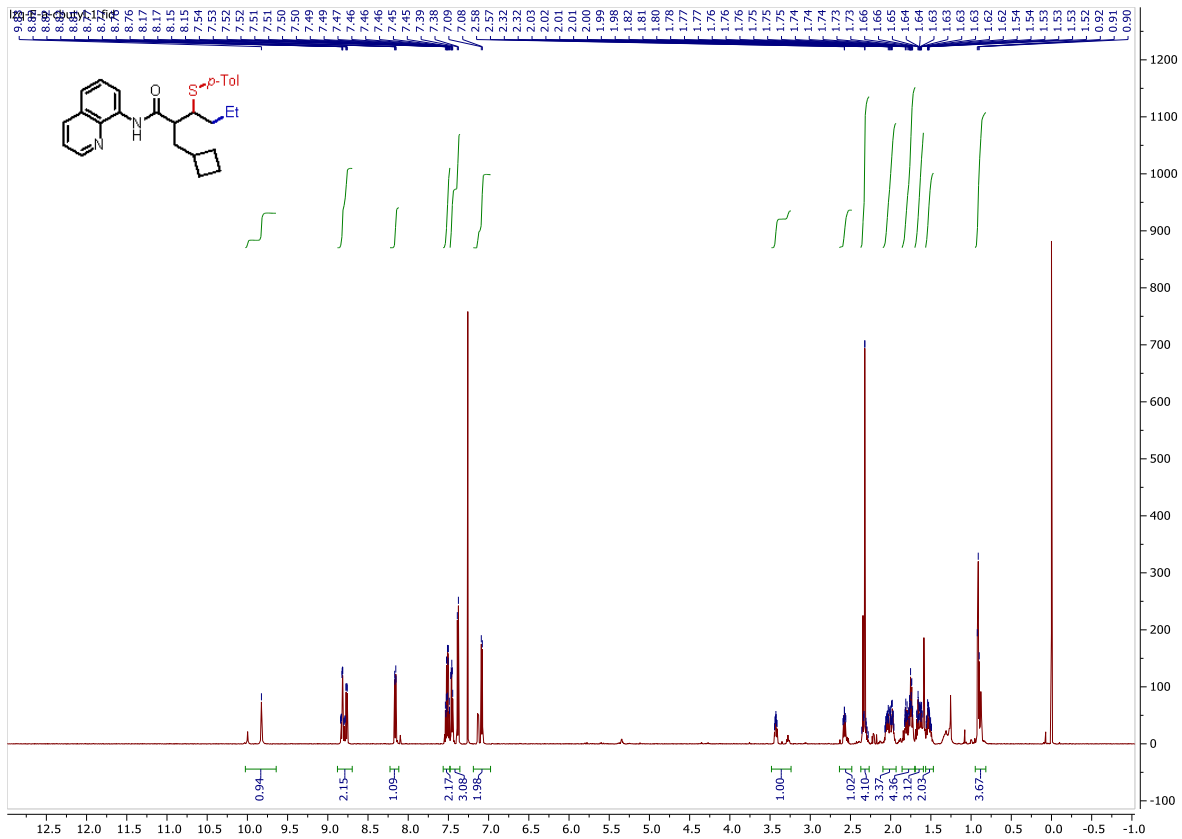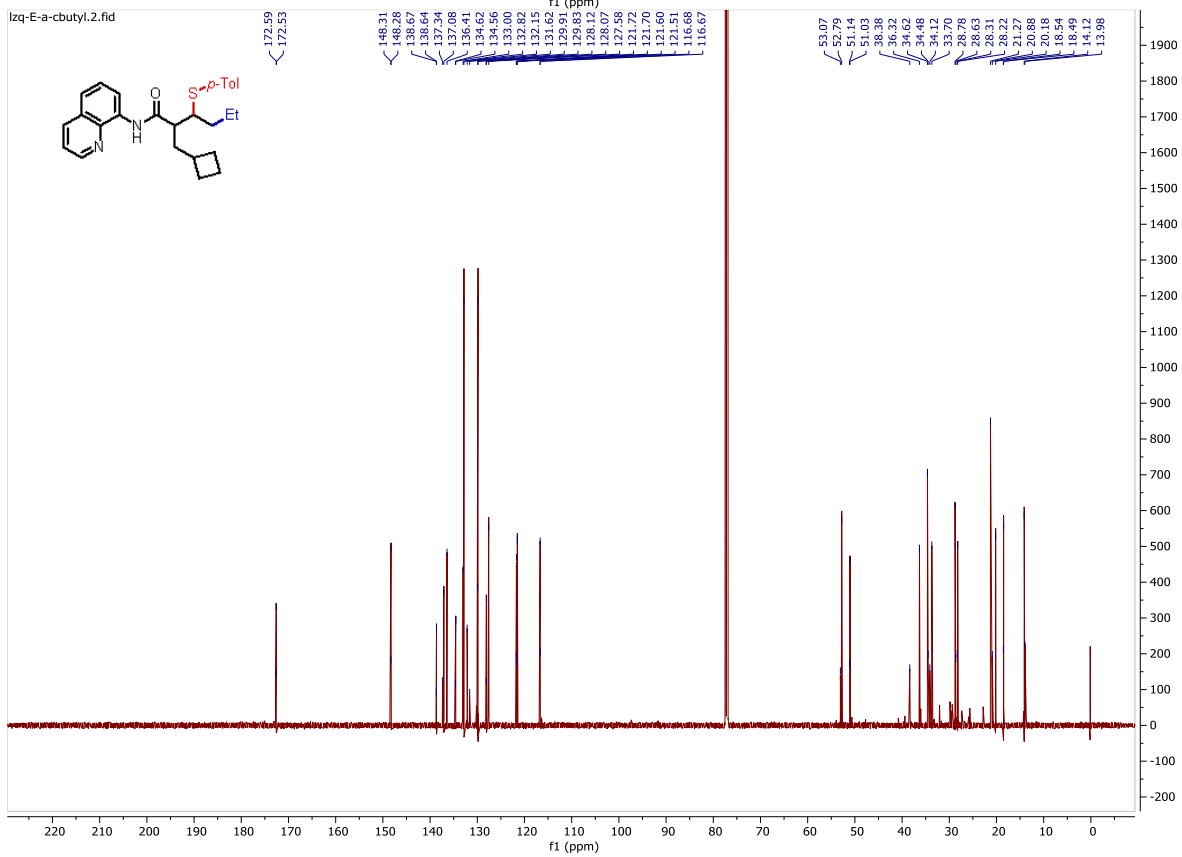

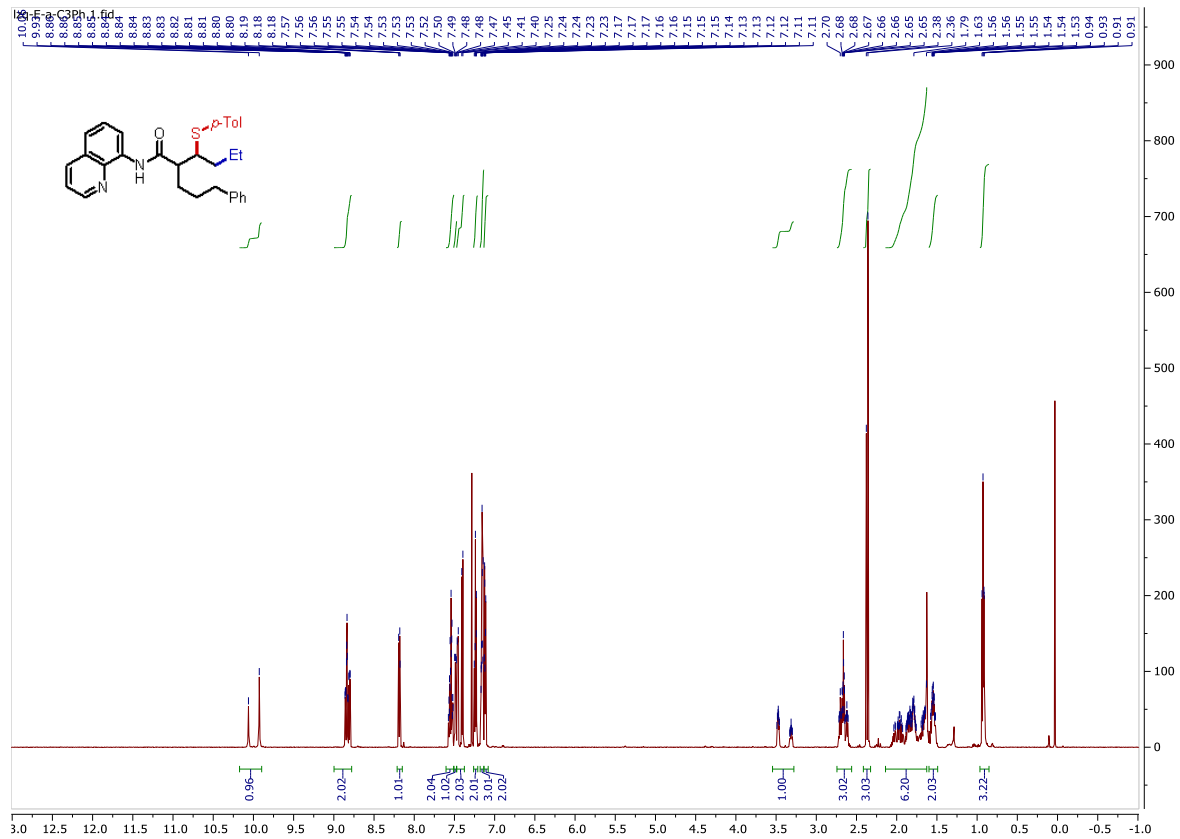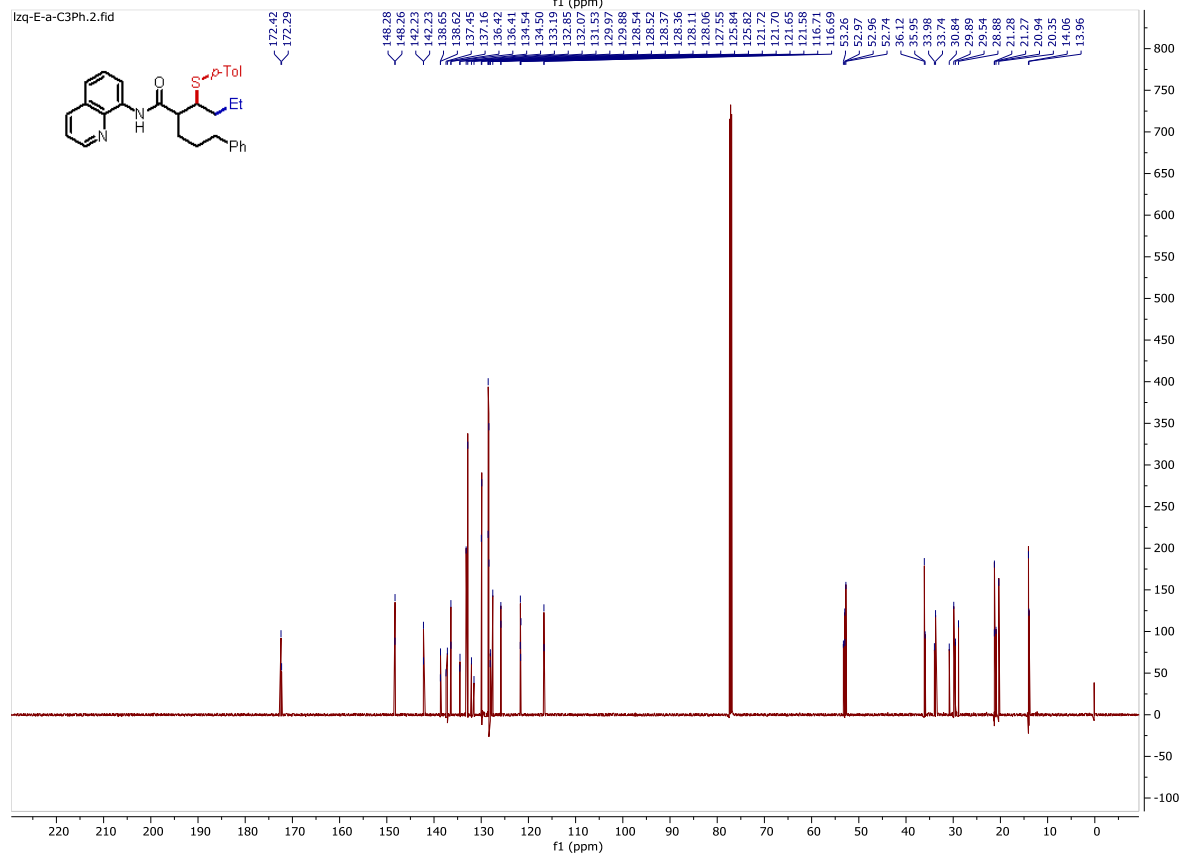

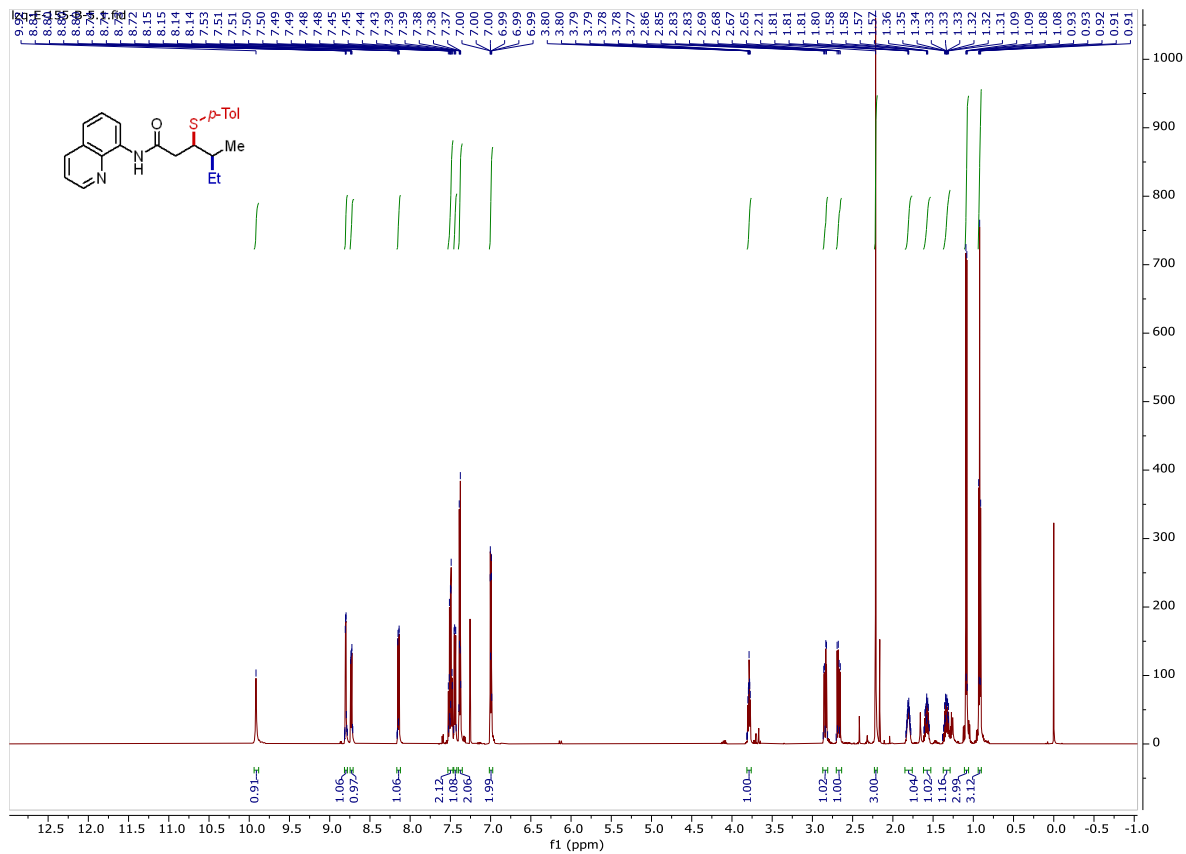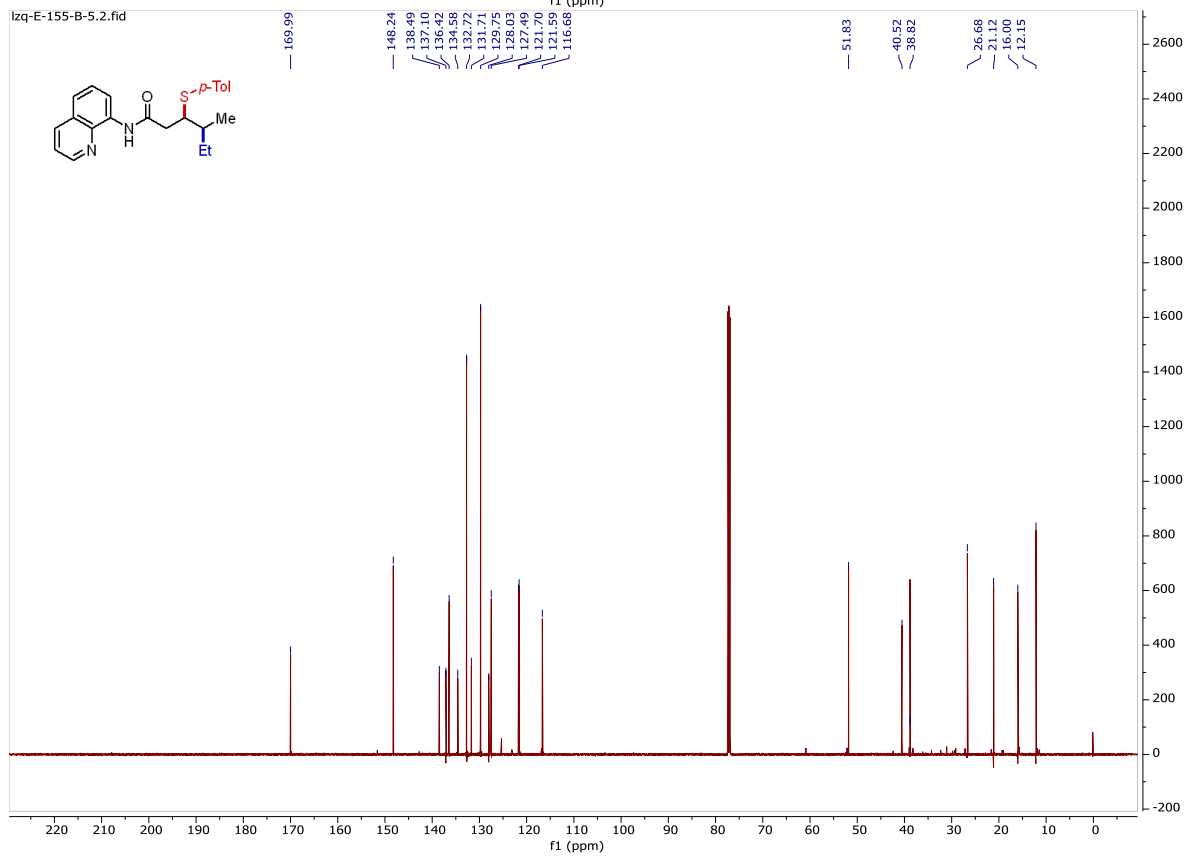

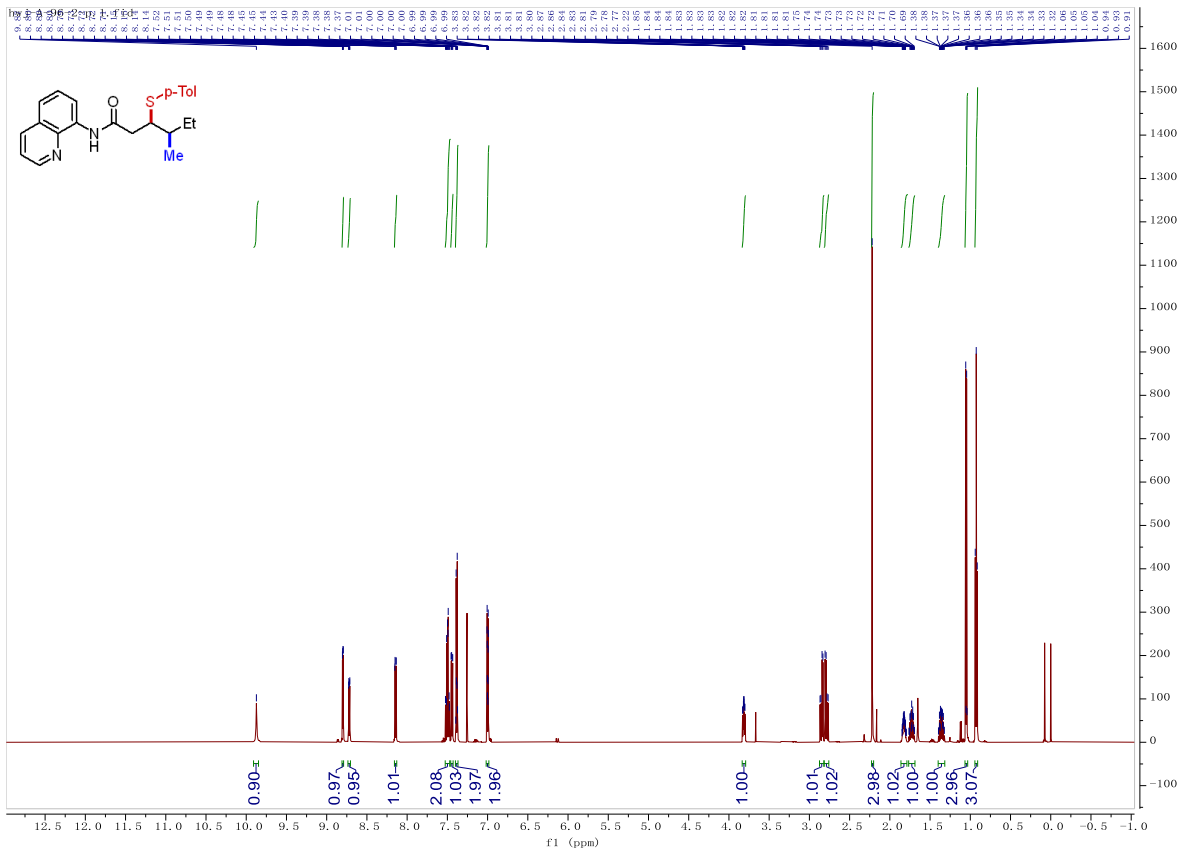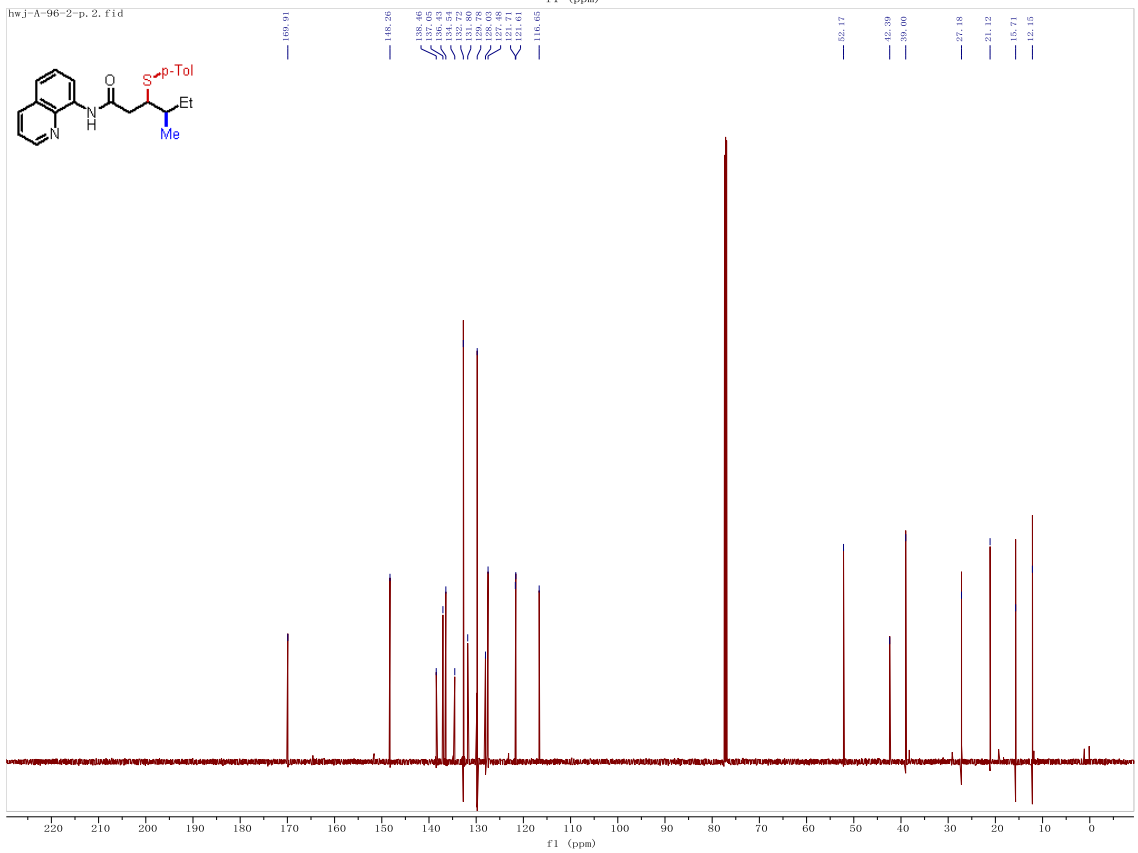

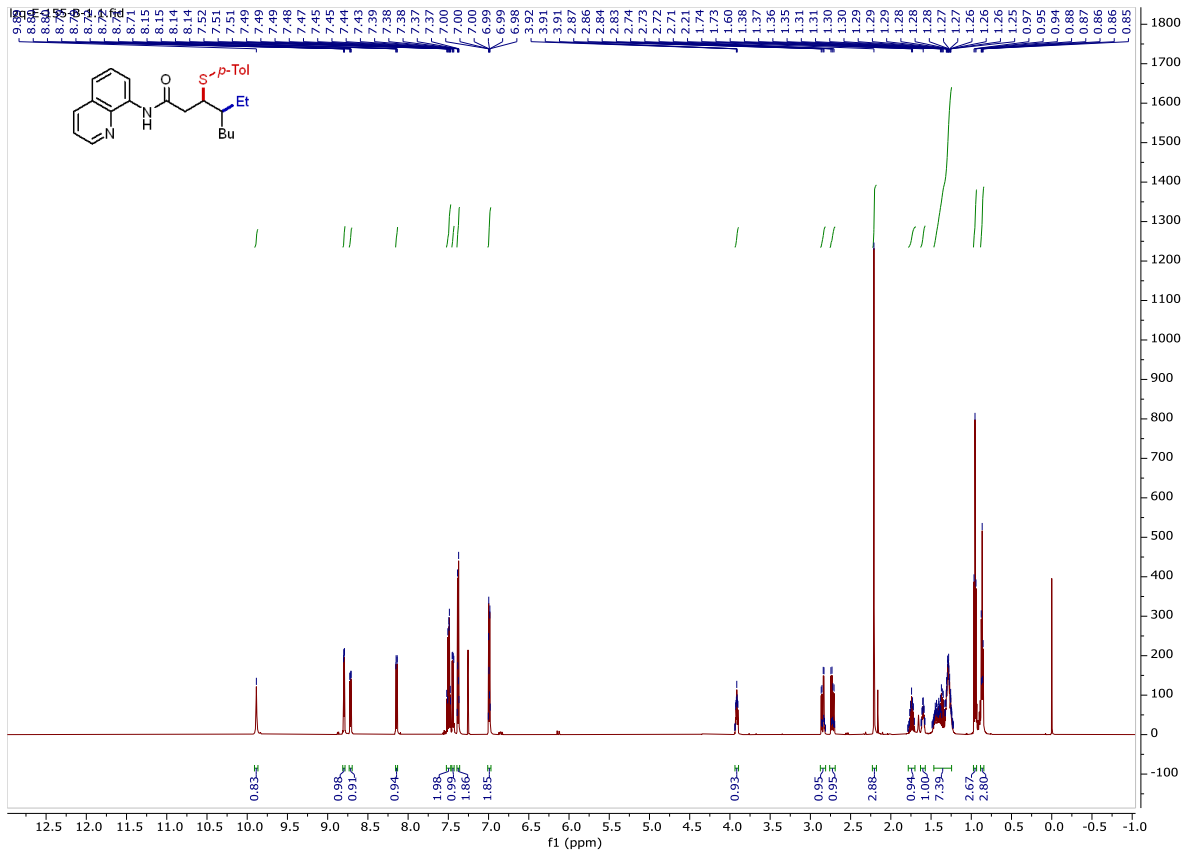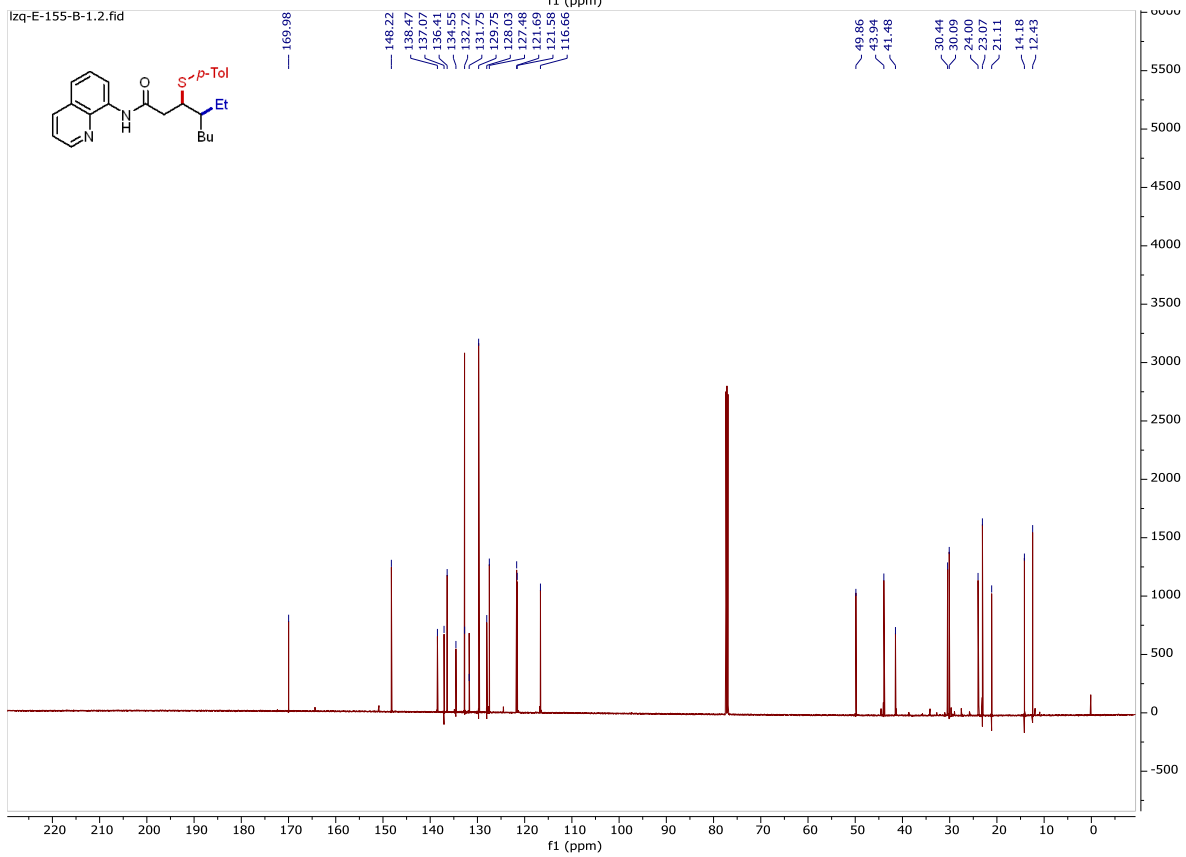

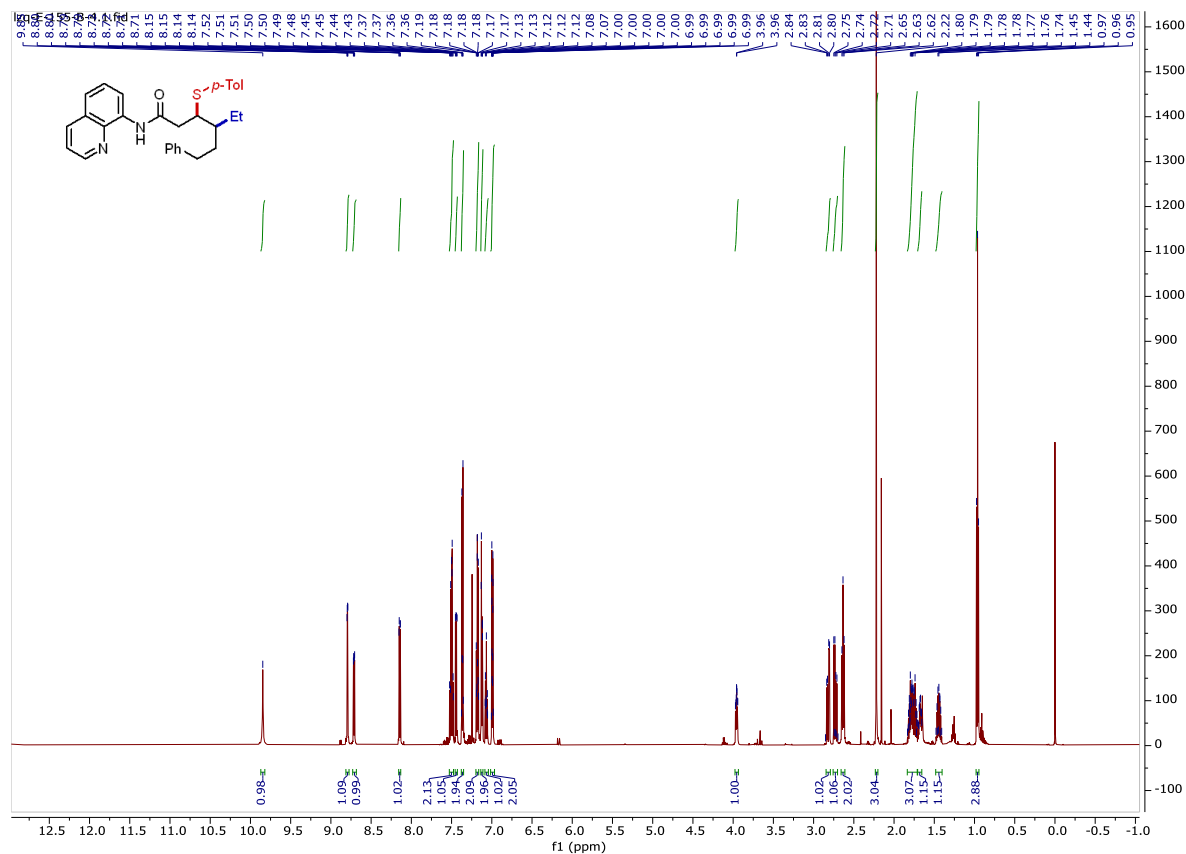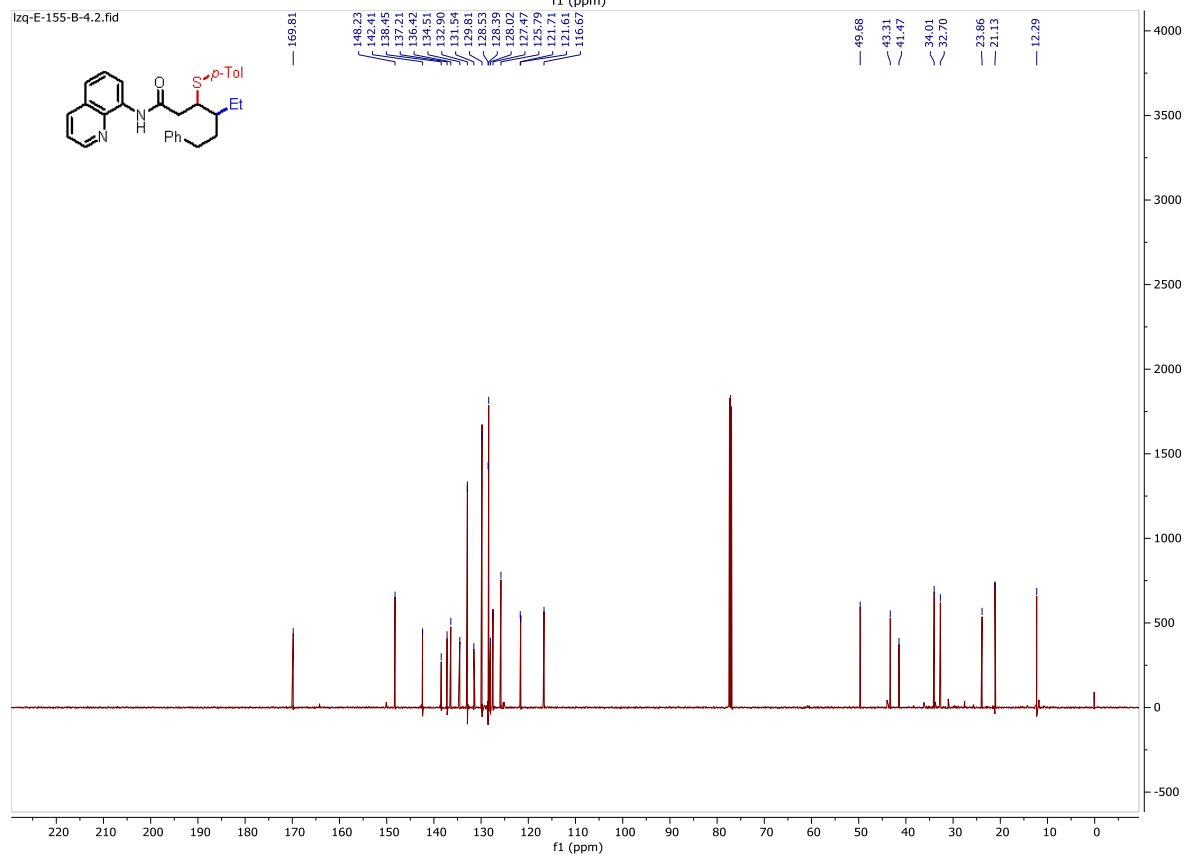



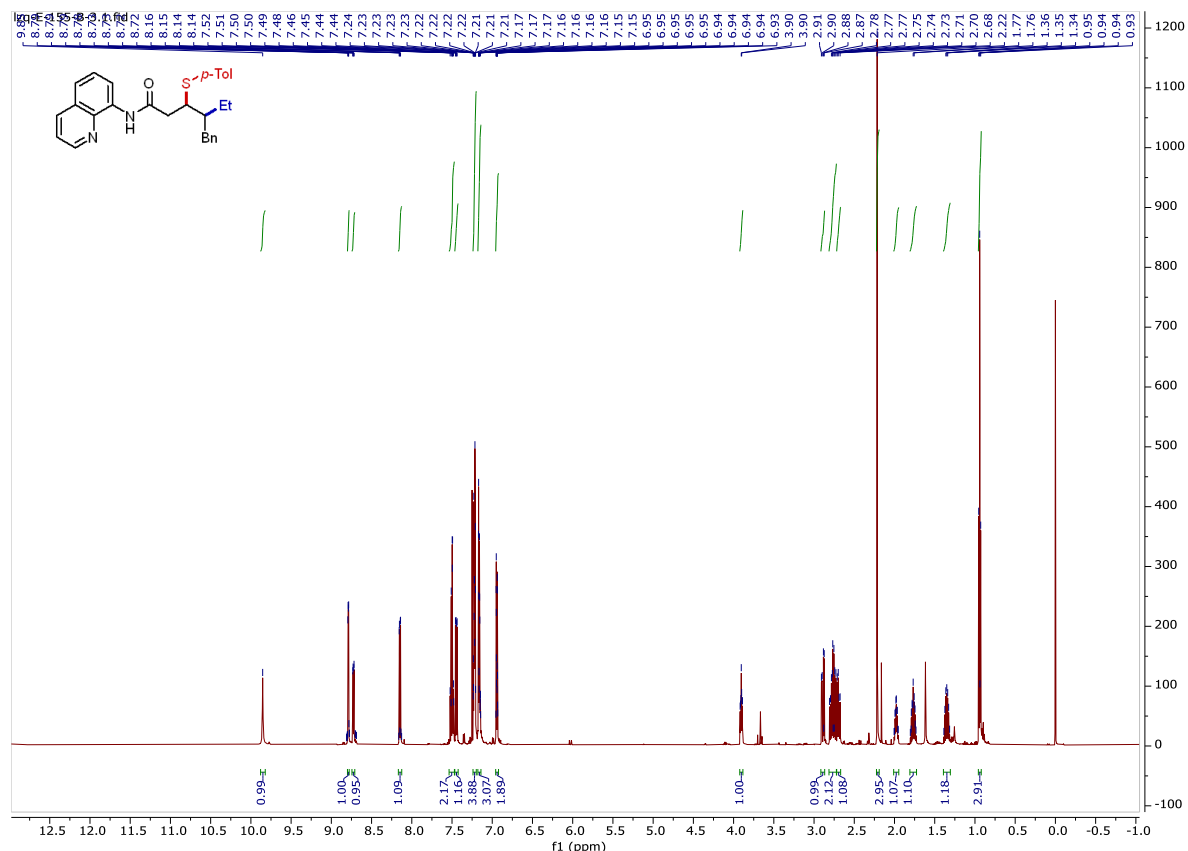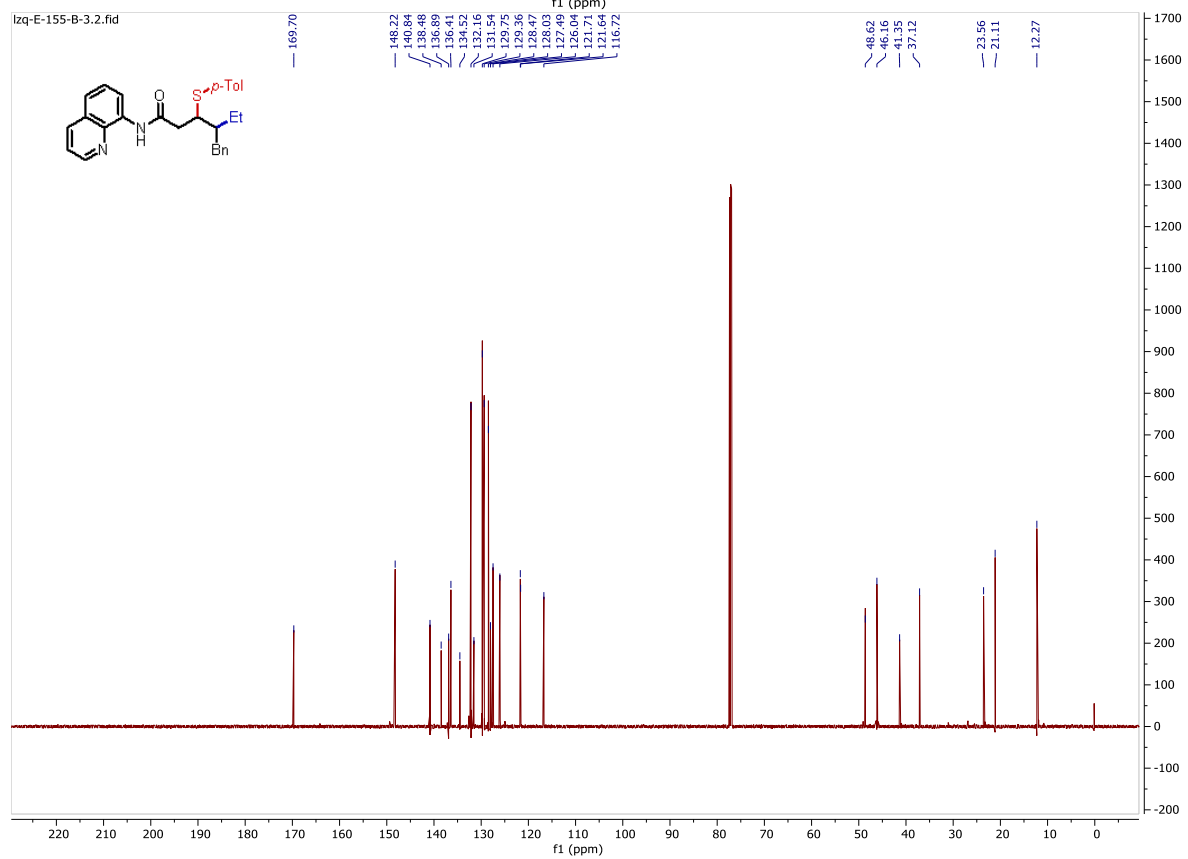

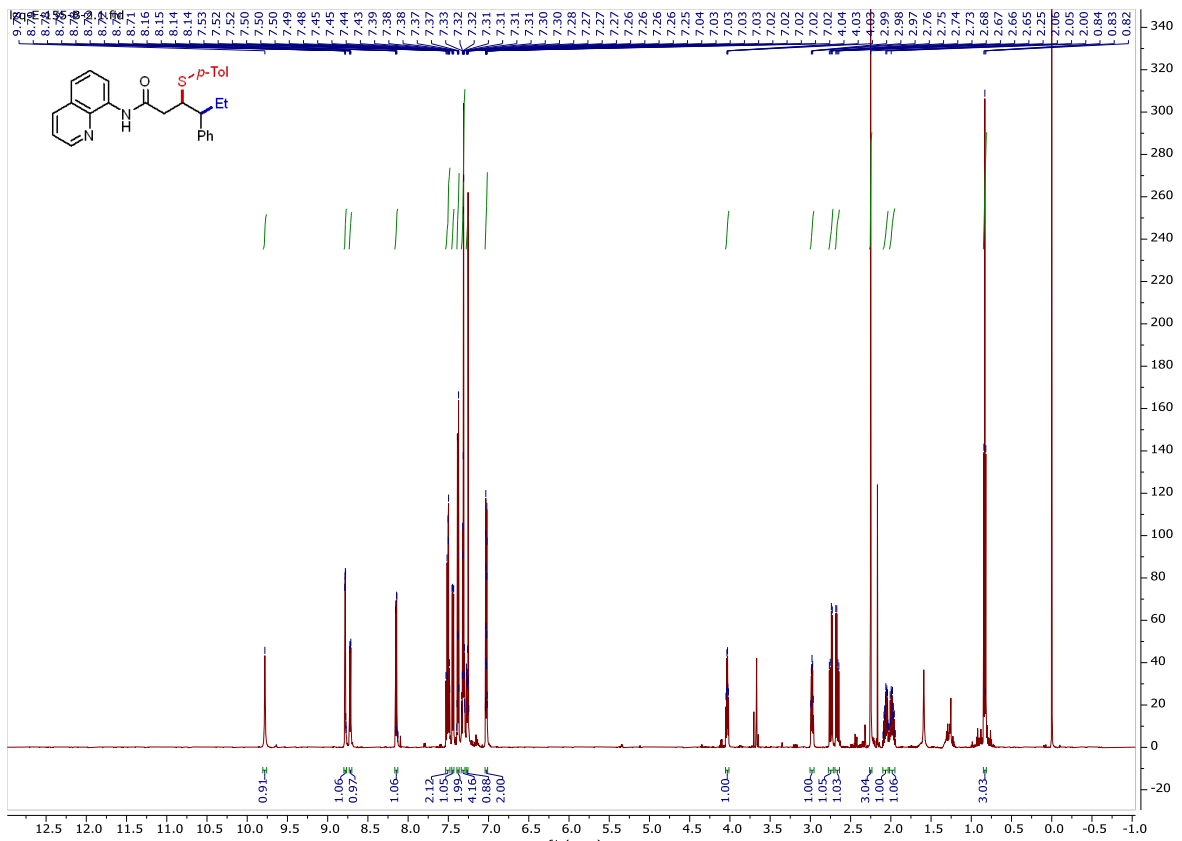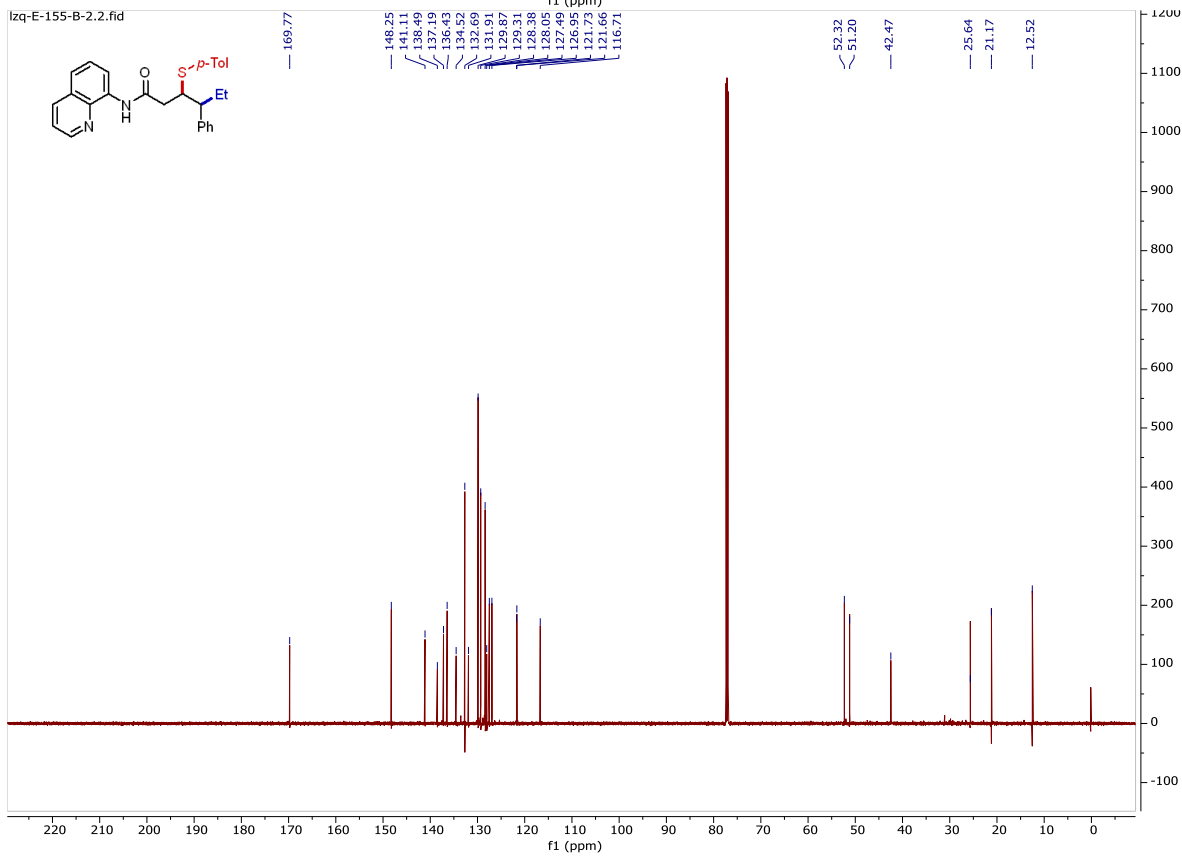

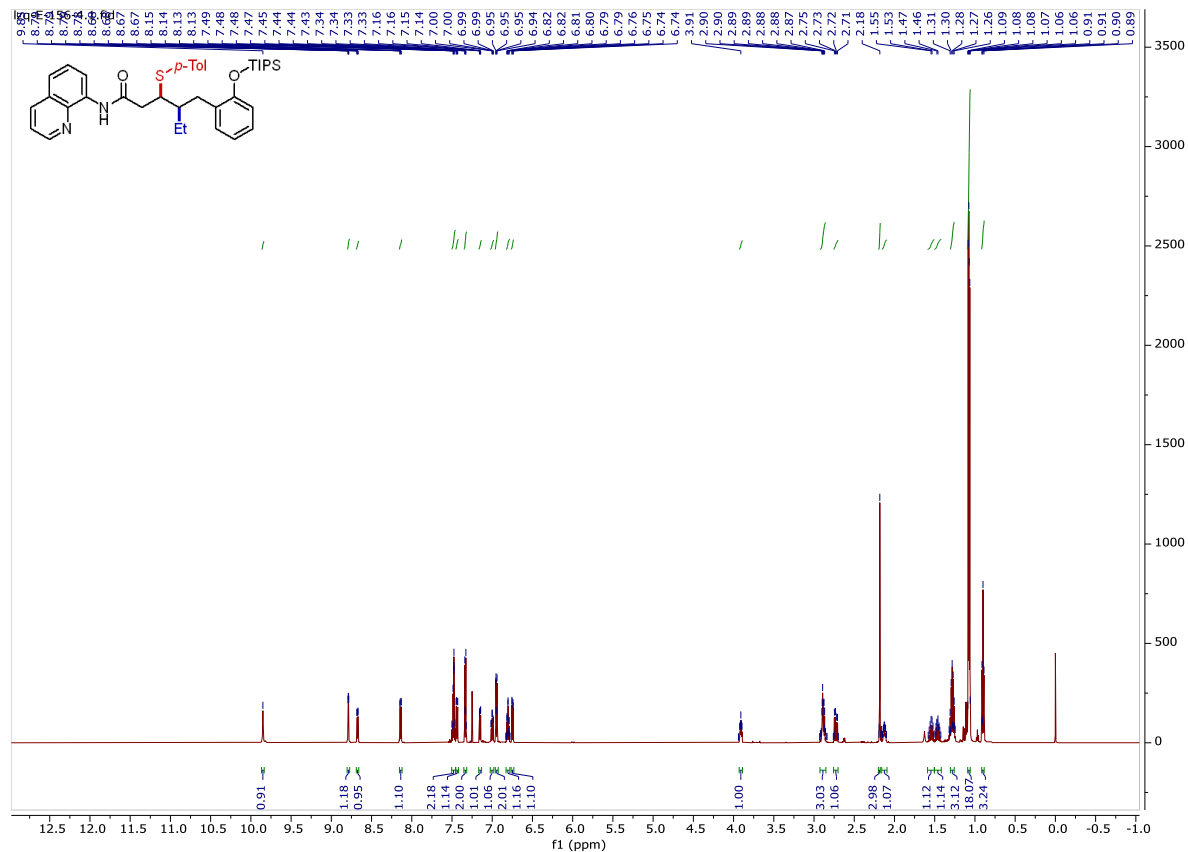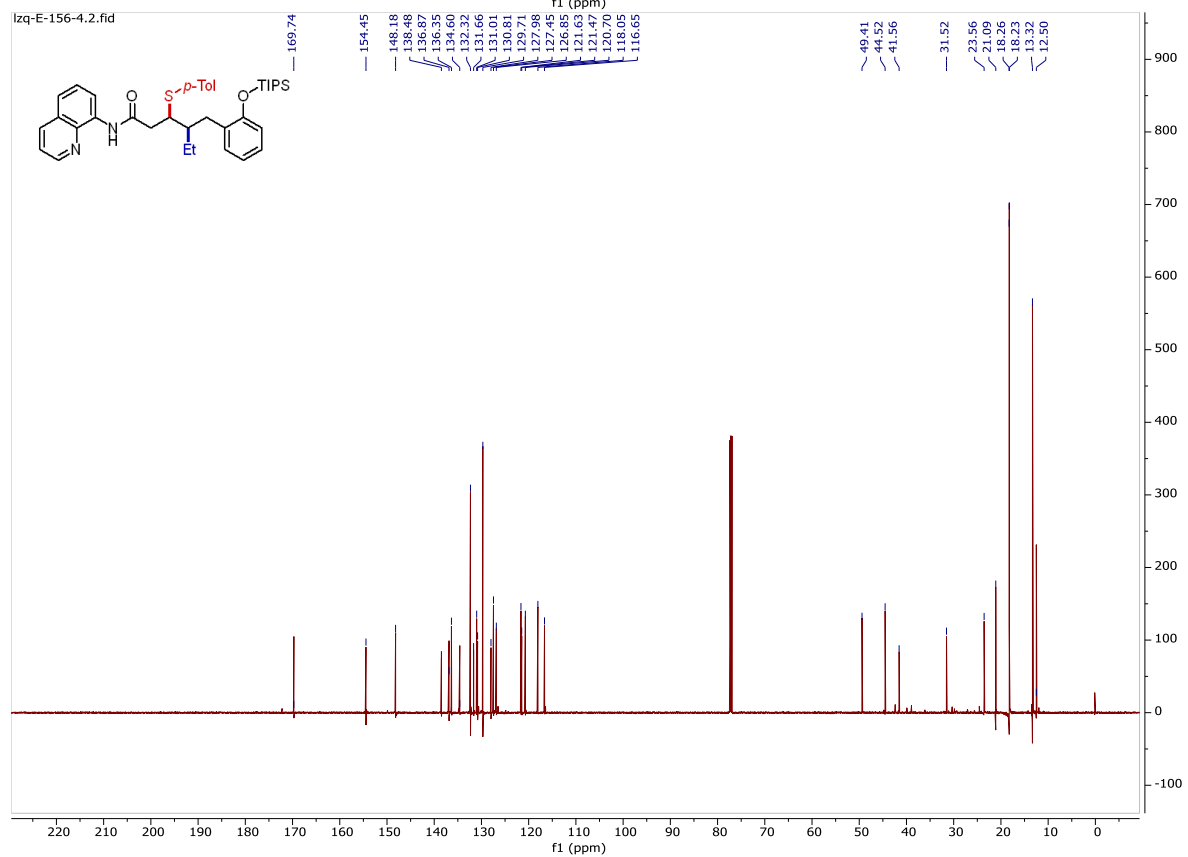

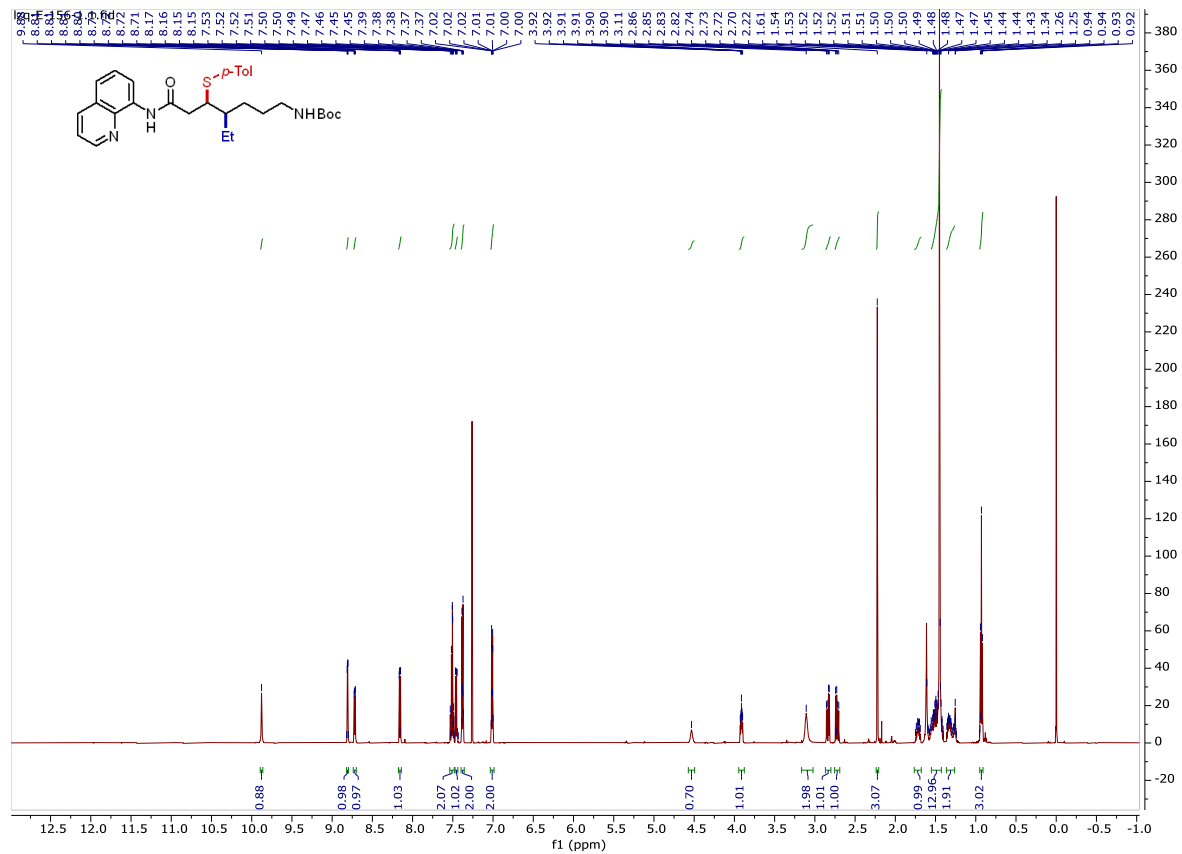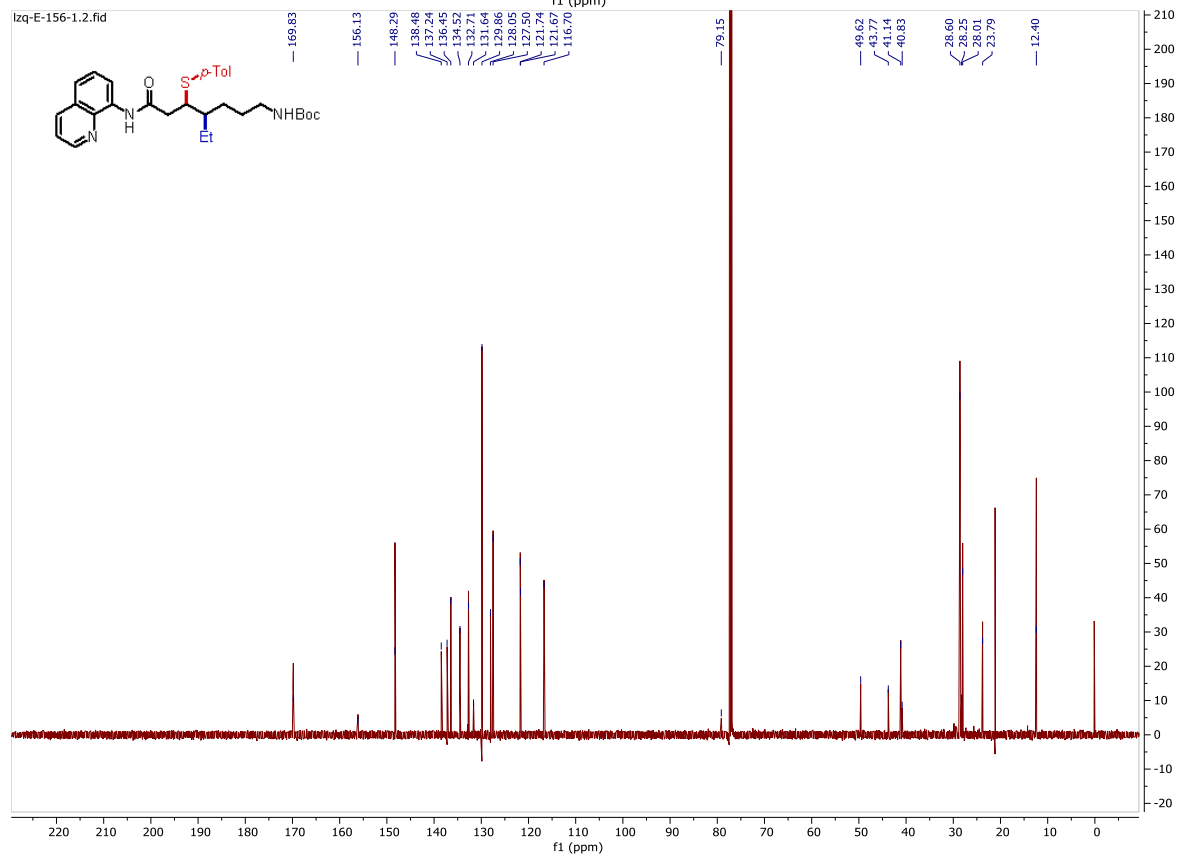

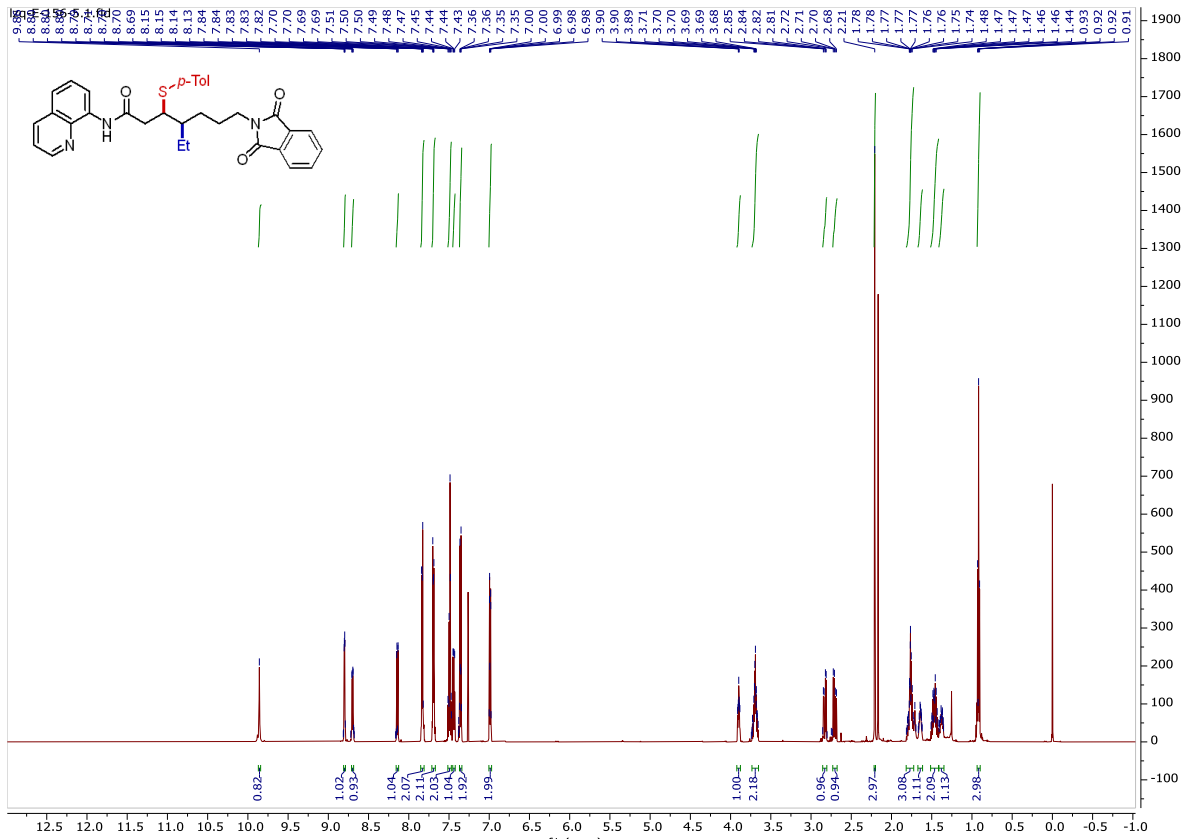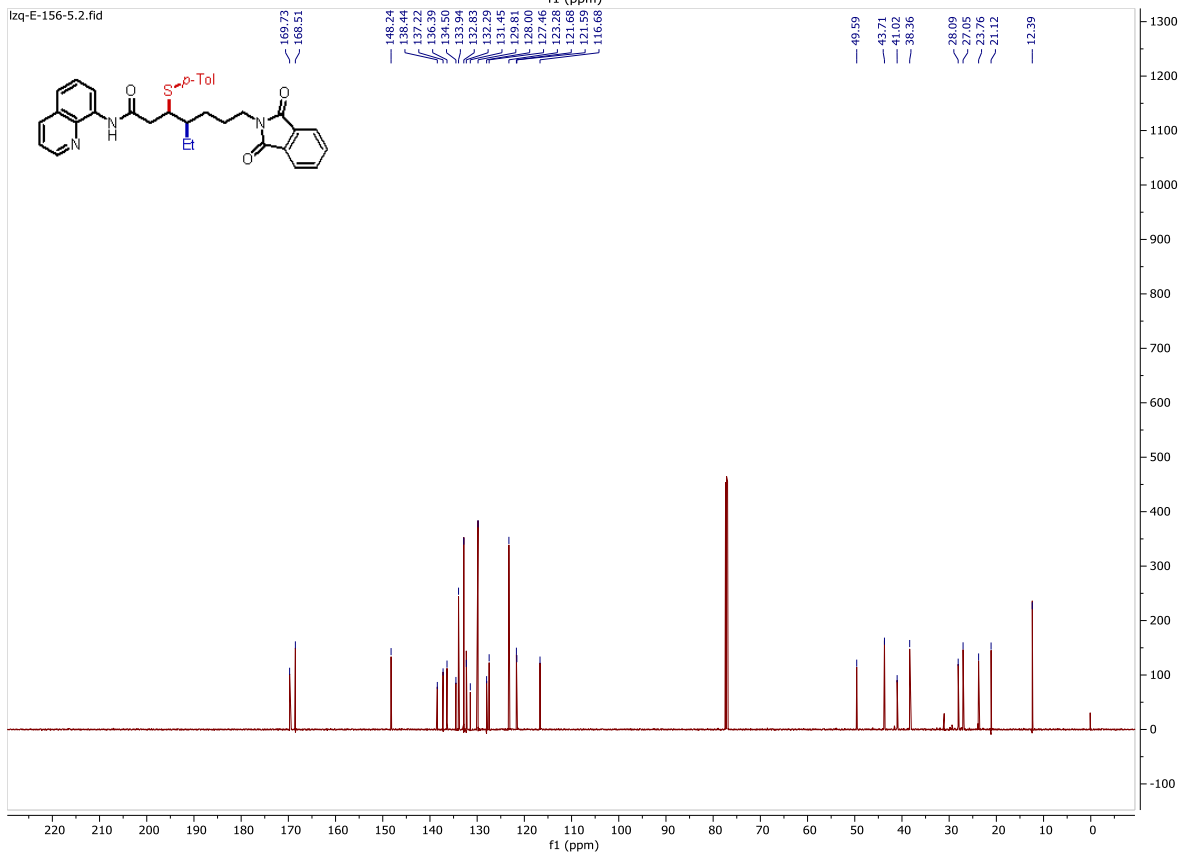

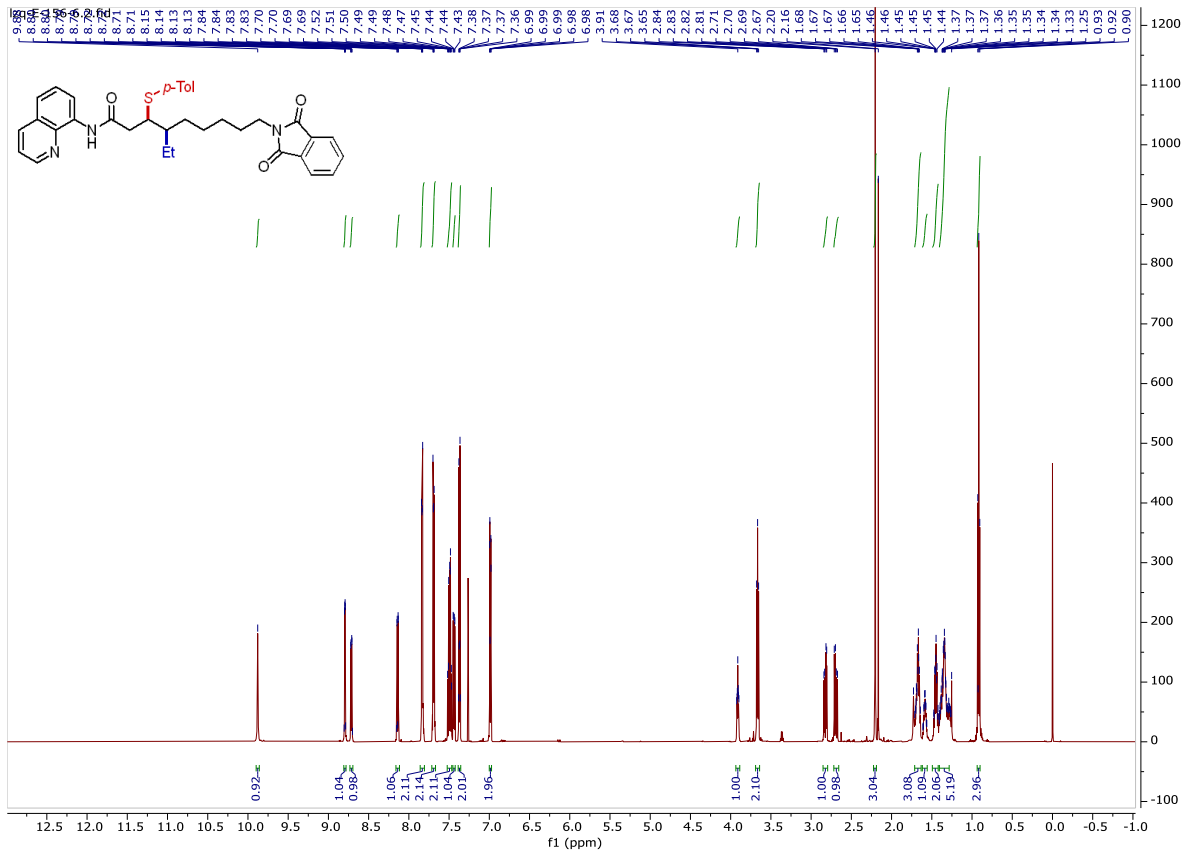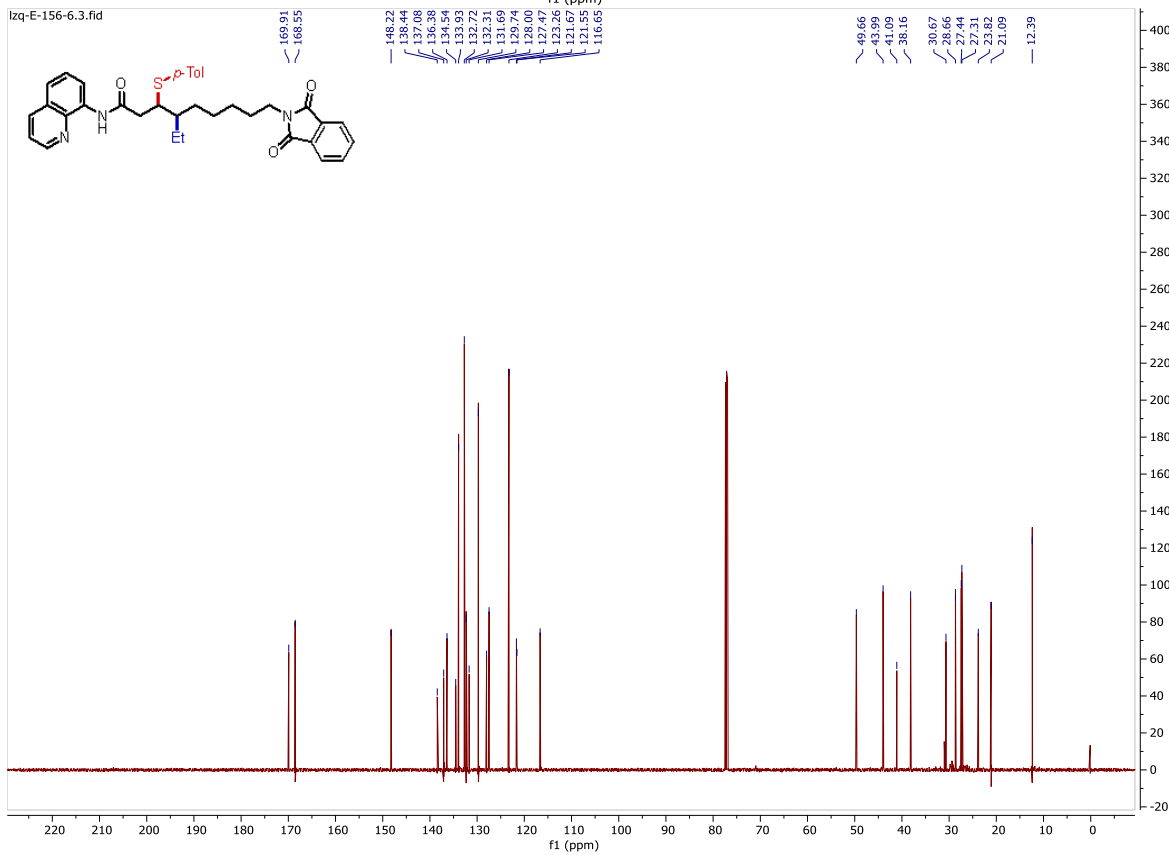

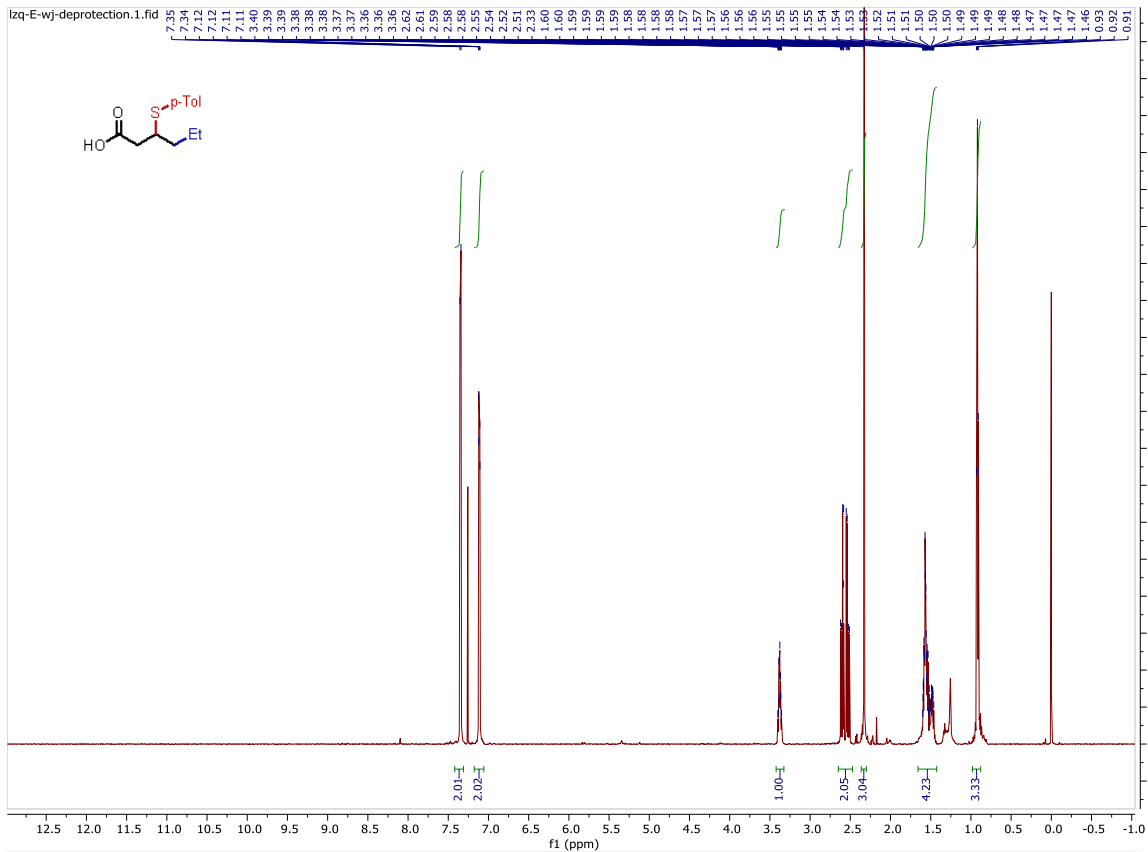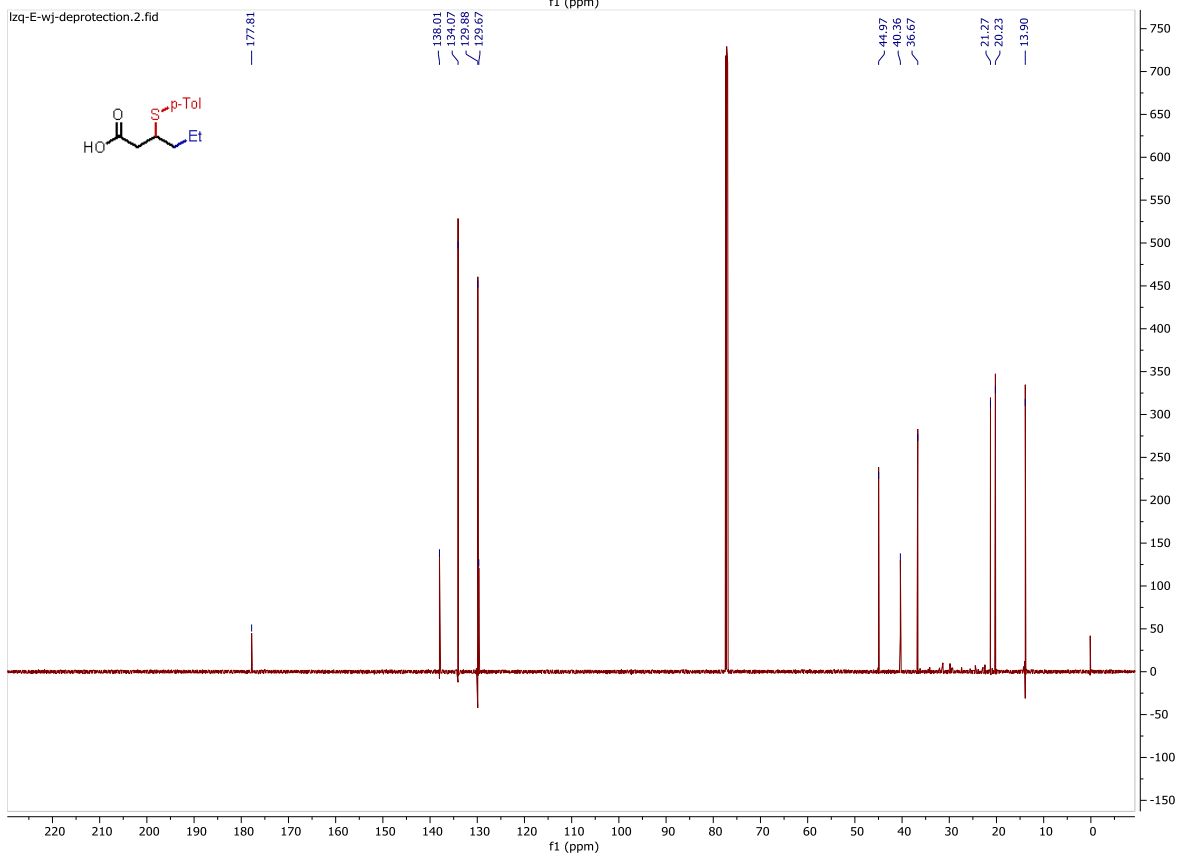

Supplement: d2sc01563c2.pdf [file d2sc01563c2.pdf]
